# Supplementary material for: A systems approach implicates nuclear receptor targeting in the Atp7b−/− mouse model of Wilson's disease
Source: Royal Society of Chemistry journal article supplement (doi:10.1039/c2mt20017a), 2012-01-01
Supplement: c2mt20017a.zip [file c2mt20017a.zip]

## Sheet: main_copy
												Wild type	Wild type	Wild type	Wild type	Atp7b-/-	Atp7b-/-	Atp7b-/-	Wild type	Wild type	Wild type	Wild type	Atp7b-/-	Atp7b-/-	Atp7b-/-	Wild type	Wild type	Wild type	Wild type	Atp7b-/-	Atp7b-/-	Atp7b-/-	Wild type	Wild type	Wild type	Wild type	Atp7b-/-	Atp7b-/-	Atp7b-/-	2.5		0.33	3	2					-1.645
																										Un-norm	Un-norm	Un-norm	Un-norm	Un-norm	Un-norm	Un-norm	Norm	Norm	Norm	Norm	Norm	Norm	Norm										1.645
	1352											Total	Total	Total	Total	Total	Total	Total	Unique	Unique	Unique	Unique	Unique	Unique	Unique	Corrected	Corrected	Corrected	Corrected	Corrected	Corrected	Corrected	Corrected	Corrected	Corrected	Corrected	Corrected	Corrected	Corrected
ProtGroup	Counter	Accession	Link	Filter	Coverage	SeqLength	MW	Description	CountsTot	UniqueTot	UniqFrac	BUK546_digest1_20090515	BUK546_digest2_20091015	BUK546_digest3_20091113	BUK546_digest4_20091119	BUK546_digest5_20090515	BUK546_digest6_20091018	BUK546_digest7_20091116	BUK546_digest1_20090515	BUK546_digest2_20091015	BUK546_digest3_20091113	BUK546_digest4_20091119	BUK546_digest5_20090515	BUK546_digest6_20091018	BUK546_digest7_20091116	BUK546_digest1_20090515	BUK546_digest2_20091015	BUK546_digest3_20091113	BUK546_digest4_20091119	BUK546_digest5_20090515	BUK546_digest6_20091018	BUK546_digest7_20091116	BUK546_digest1_20090515	BUK546_digest2_20091015	BUK546_digest3_20091113	BUK546_digest4_20091119	BUK546_digest5_20090515	BUK546_digest6_20091018	BUK546_digest7_20091116	Norm Ave All	Meets Ave thresh	Meets min uniqfrac	in how many 1to4	in how many 5to7	Meets missing data	Ave 1to4	Ave 5to7	Log2 Ratio 1to4/5to7	Z score
387	1	H4_MOUSE	H4_MOUSE		61.2	103	11368	Histone H4 OS=Mus musculus GN=Hist1h4a PE=1 SV=2	12884	12884	1	3501	1216	898	2437	2847	1070	915	3501	1216	898	2437	2847	1070	915	3501	1216	898	2437	2847	1070	915	1861.07	1861.07	1861.07	1861.07	1861.07	1861.07	1039.61	1743.72	TRUE	TRUE	4	3	TRUE	1861.07	1587.25	0.229604	0.627926
132	1	ROA2_MOUSE	ROA2_MOUSE		86.4	353	37404	Heterogeneous nuclear ribonucleoproteins A2/B1 OS=Mus musculus GN=Hnrnpa2b1 PE=1 SV=2	8338	8313	0.997	1719	919	847	1194	1782	926	951	1714	914	842	1192	1781	925	945	1717.63	917.378	845.571	1193.29	1781.69	925.717	949.248	1272.71	1039.61	1272.71	1272.71	1039.61	1272.71	1272.71	1206.11	TRUE	TRUE	4	3	TRUE	1214.43	1195.01	0.0232629	-0.0760081
166	1	H2AZ_MOUSE	H2AZ_MOUSE		53.9	128	13554	Histone H2A.Z OS=Mus musculus GN=H2afz PE=1 SV=2	7627	1518	0.199	1117	833	610	856	2244	891	1076	88	216	267	49	214	245	439	1021.53	795.956	595.419	719.22	2188.64	858.267	1058.51	860.374	860.374	860.374	860.374	1272.71	1039.61	1861.07	1087.84	TRUE	FALSE	4	3	TRUE	860.374	1391.13	-0.693221	-2.5203
170	1	H2B1M_MOUSE	H2B1M_MOUSE		53.2	126	13937	Histone H2B type 1-M OS=Mus musculus GN=Hist1h2bm PE=1 SV=2	10204	32	0.003	2166	1398	1218	1278	1741	993	1410	3	7	3	4	7	5	3	1300.8	1088.89	732	641	1355.67	828.333	706.5	1039.61	1272.71	1039.61	610.939	860.374	860.374	860.374	934.856	TRUE	FALSE	4	3	TRUE	990.716	860.374	0.203507	0.538897
291	1	LMNA_MOUSE	LMNA_MOUSE		65.7	665	74239	Lamin-A/C OS=Mus musculus GN=Lmna PE=1 SV=2	4291	4189	0.976	880	533	562	780	594	443	499	864	522	545	762	579	428	489	873.315	527.564	553.484	772.123	586.417	435.304	494.01	610.939	593.638	697.773	1039.61	429.836	564.232	593.638	647.095	TRUE	TRUE	4	3	TRUE	735.49	529.236	0.474795	1.4644
1178	1	HNRPM_MOUSE	HNRPM_MOUSE		60.2	729	77650	Heterogeneous nuclear ribonucleoprotein M OS=Mus musculus GN=Hnrnpm PE=1 SV=3	4258	4258	1	765	628	535	612	680	552	486	765	628	535	612	680	552	486	765	628	535	612	680	552	486	564.232	697.773	610.939	532.019	593.638	697.773	564.232	608.658	TRUE	TRUE	4	3	TRUE	601.241	618.548	-0.0409423	-0.295045
1332	1	H2AY_MOUSE	H2AY_MOUSE		57.5	372	39736	Core histone macro-H2A.1 OS=Mus musculus GN=H2afy PE=1 SV=3	4148	3944	0.951	957	540	333	705	783	447	383	929	508	305	670	761	415	356	956.643	539.023	332.111	704.844	782.942	446.695	382.479	697.773	610.939	429.836	697.773	697.773	593.638	443.584	595.902	TRUE	TRUE	4	3	TRUE	609.08	578.332	0.0747353	0.0995904
119	1	DHX9_MOUSE	DHX9_MOUSE		37.2	1380	149476	ATP-dependent RNA helicase A OS=Mus musculus GN=Dhx9 PE=1 SV=2	3495	3495	1	583	473	499	400	588	425	527	583	473	499	400	588	425	527	583	473	499	400	588	425	527	465.979	532.019	593.638	346	443.584	532.019	610.939	503.454	TRUE	TRUE	4	3	TRUE	484.409	528.847	-0.126626	-0.587353
927	1	HNRPL_MOUSE	HNRPL_MOUSE		53.2	586	63965	Heterogeneous nuclear ribonucleoprotein L OS=Mus musculus GN=Hnrnpl PE=1 SV=2	3409	3409	1	560	477	472	362	634	464	440	560	477	472	362	634	464	440	560	477	472	362	634	464	440	429.836	564.232	532.019	330.464	465.979	610.939	465.979	485.635	TRUE	TRUE	4	3	TRUE	464.138	514.299	-0.148053	-0.660455
169	1	H2B1F_MOUSE	H2B1F_MOUSE		53.2	126	13937	Histone H2B type 1-F/J/L OS=Mus musculus GN=Hist1h2bf PE=1 SV=2	10188	16	0.002	2165	1393	1217	1278	1736	989	1410	2	2	2	4	2	1	3	867.2	311.111	488	641	387.333	165.667	706.5	593.638	393.589	564.232	593.638	288.495	226.025	697.773	479.627	TRUE	FALSE	4	3	TRUE	536.275	404.098	0.408268	1.23744
770	1	ROA3_MOUSE	ROA3_MOUSE		59.4	379	39653	Heterogeneous nuclear ribonucleoprotein A3 OS=Mus musculus GN=Hnrnpa3 PE=1 SV=1	3252	3053	0.939	578	362	356	561	703	320	372	536	340	326	532	673	297	349	567.692	354.423	347.263	554.338	697.236	315.132	363.807	443.584	465.979	446.859	446.859	610.939	429.836	429.836	467.699	TRUE	TRUE	4	3	TRUE	450.82	490.204	-0.12083	-0.567583
404	1	HSP7C_MOUSE	HSP7C_MOUSE		52.8	646	70872	Heat shock cognate 71 kDa protein OS=Mus musculus GN=Hspa8 PE=1 SV=1	3273	2662	0.813	578	338	323	631	668	340	395	473	278	260	503	544	284	320	572.607	333.385	315.251	624.321	657.133	332.427	383.802	446.859	429.836	380.834	564.232	532.019	465.979	446.859	466.66	TRUE	TRUE	4	3	TRUE	455.44	481.619	-0.0806301	-0.403578
358	1	HNRPK_MOUSE	HNRPK_MOUSE		53.1	463	50977	Heterogeneous nuclear ribonucleoprotein K OS=Mus musculus GN=Hnrnpk PE=1 SV=1	3215	3215	1	617	323	351	567	674	329	354	617	323	351	567	674	329	354	617	323	351	567	674	329	354	486	409.848	465.979	465.979	564.232	443.584	409.848	463.638	TRUE	TRUE	4	3	TRUE	456.951	472.555	-0.0484407	-0.291443
989	1	HNRPU_MOUSE	HNRPU_MOUSE		41.9	800	87919	Heterogeneous nuclear ribonucleoprotein U OS=Mus musculus GN=Hnrnpu PE=1 SV=1	2972	2972	1	519	345	328	482	521	329	448	519	345	328	482	521	329	448	519	345	328	482	521	329	448	409.848	446.859	409.848	393.589	393.589	446.859	486	426.656	TRUE	TRUE	4	3	TRUE	415.036	442.149	-0.0912977	-0.716085
164	1	NUCL_MOUSE	NUCL_MOUSE		42.6	707	76724	Nucleolin OS=Mus musculus GN=Ncl PE=1 SV=2	2745	2745	1	443	227	306	518	641	282	328	443	227	306	518	641	282	328	443	227	306	518	641	282	328	346	282.178	375.497	429.836	486	380.834	380.834	383.026	TRUE	TRUE	4	3	TRUE	358.378	415.889	-0.214718	-1.169
600	1	DDX5_MOUSE	DDX5_MOUSE		55.2	614	69321	Probable ATP-dependent RNA helicase DDX5 OS=Mus musculus GN=Ddx5 PE=1 SV=1	2875	1771	0.616	449	330	387	484	512	342	371	251	219	259	291	274	220	257	403.411	291.163	345.709	435.592	450.249	303.154	330.965	320.201	380.834	443.584	375.497	330.464	409.848	393.589	379.145	TRUE	TRUE	4	3	TRUE	380.029	377.967	0.00784847	-0.184482
1109	1	PRP8_MOUSE	PRP8_MOUSE		46.4	2335	273617	Pre-mRNA-processing-splicing factor 8 OS=Mus musculus GN=Prpf8 PE=1 SV=2	2202	2202	1	199	389	403	187	237	336	451	199	389	403	187	237	336	451	199	389	403	187	237	336	451	184.791	486	486	184.791	187.384	486	532.019	363.855	TRUE	TRUE	4	3	TRUE	335.396	401.801	-0.260617	-1.38673
271	1	H14_MOUSE	H14_MOUSE		38.4	219	21978	Histone H1.4 OS=Mus musculus GN=Hist1h1e PE=1 SV=2	2635	1116	0.424	520	367	234	572	398	299	245	259	127	80	284	186	101	79	506.413	338.815	224.429	553.391	385.368	276.186	233.207	375.497	443.584	254.569	443.584	282.178	375.497	226.025	342.991	TRUE	TRUE	4	3	TRUE	379.308	294.567	0.364777	1.42788
1377	1	HNRPC_MOUSE	HNRPC_MOUSE		69.3	313	34386	Heterogeneous nuclear ribonucleoproteins C1/C2 OS=Mus musculus GN=Hnrnpc PE=1 SV=1	2442	2442	1	511	212	232	443	596	199	249	511	212	232	443	596	199	249	511	212	232	443	596	199	249	393.589	254.569	272.277	380.834	446.859	247.766	254.569	321.495	TRUE	TRUE	4	3	TRUE	325.317	316.398	0.040108	0.000760581
190	1	LMNB1_MOUSE	LMNB1_MOUSE		61.4	588	66787	Lamin-B1 OS=Mus musculus GN=Lmnb1 PE=1 SV=3	2204	2054	0.932	364	299	333	371	336	235	266	346	277	305	349	316	216	245	350.847	285.927	315.882	355.99	322.716	221.602	253.044	297.738	375.497	393.589	303.825	254.569	263.132	263.132	307.355	TRUE	TRUE	4	3	TRUE	342.663	260.278	0.396737	1.35989
171	1	H10_MOUSE	H10_MOUSE		21.1	194	20862	Histone H1.0 OS=Mus musculus GN=H1f0 PE=2 SV=4	2365	2365	1	634	212	142	568	525	137	147	634	212	142	568	525	137	147	634	212	142	568	525	137	147	532.019	247.766	137.927	486	409.848	164.477	140.707	302.678	TRUE	TRUE	4	3	TRUE	350.928	238.344	0.558131	1.97689
688	1	SFRS1_MOUSE	SFRS1_MOUSE		52.4	248	27746	Splicing factor, arginine/serine-rich 1 OS=Mus musculus GN=Sfrs1 PE=1 SV=3	2019	2019	1	356	238	222	357	349	249	248	356	238	222	357	349	249	248	356	238	222	357	349	249	248	303.825	303.825	236.753	320.201	272.277	330.464	247.766	287.873	TRUE	TRUE	4	3	TRUE	291.151	283.502	0.0384059	0.0751277
1205	1	NOP56_MOUSE	NOP56_MOUSE		62.4	580	64465	Nucleolar protein 56 OS=Mus musculus GN=Nop56 PE=1 SV=2	2032	2032	1	307	222	247	341	449	225	241	307	222	247	341	449	225	241	307	222	247	341	449	225	241	282.178	263.132	297.738	288.495	320.201	282.178	236.753	281.525	TRUE	TRUE	4	3	TRUE	282.886	279.71	0.0162858	-0.0138215
1045	1	SF3B3_MOUSE	SF3B3_MOUSE		41.9	1217	135551	Splicing factor 3B subunit 3 OS=Mus musculus GN=Sf3b3 PE=2 SV=1	1838	1838	1	274	269	265	285	245	216	284	274	269	265	285	245	216	284	274	269	265	285	245	216	284	247.766	346	346	254.569	196.597	258.813	303.825	279.081	TRUE	TRUE	4	3	TRUE	298.584	253.078	0.238551	0.785676
1154	1	CENPV_MOUSE	CENPV_MOUSE		64.3	252	27542	Centromere protein V OS=Mus musculus GN=Cenpv PE=2 SV=2	2133	2133	1	442	203	220	348	499	228	193	442	203	220	348	499	228	193	442	203	220	348	499	228	193	330.464	229.798	226.025	297.738	380.834	288.495	193.239	278.085	TRUE	TRUE	4	3	TRUE	271.006	287.523	-0.0853497	-0.275913
998	1	SFPQ_MOUSE	SFPQ_MOUSE		42.8	699	75443	Splicing factor, proline- and glutamine-rich OS=Mus musculus GN=Sfpq PE=1 SV=1	1923	1817	0.945	276	238	266	343	285	228	287	259	227	254	325	265	217	270	268.328	232.561	260.485	334.638	275.392	221.832	278.76	236.753	297.738	320.201	282.178	226.025	272.277	297.738	276.13	TRUE	TRUE	4	3	TRUE	284.217	265.347	0.0991161	0.362678
913	1	MATR3_MOUSE	MATR3_MOUSE		35.8	846	94631	Matrin-3 OS=Mus musculus GN=Matr3 PE=1 SV=1	1771	1771	1	273	241	239	239	248	246	285	273	241	239	239	248	246	285	273	241	239	239	248	246	285	242.995	330.464	288.495	217.853	203.041	320.201	320.201	274.75	TRUE	TRUE	4	3	TRUE	269.952	281.148	-0.0586247	-0.130831
212	1	LMNB2_MOUSE	LMNB2_MOUSE		60.9	596	67319	Lamin-B2 OS=Mus musculus GN=Lmnb2 PE=1 SV=2	1896	1746	0.921	292	255	270	266	296	254	263	274	233	242	244	276	235	242	277.838	240.509	250.634	248.887	281.866	241.094	249.946	254.569	320.201	303.825	229.798	236.753	303.825	258.813	272.541	TRUE	TRUE	4	3	TRUE	277.098	266.464	0.0564583	0.151011
1076	1	NONO_MOUSE	NONO_MOUSE		55.2	473	54542	Non-POU domain-containing octamer-binding protein OS=Mus musculus GN=Nono PE=1 SV=3	1815	1709	0.942	230	233	228	300	265	288	271	213	222	216	282	245	277	254	220.672	227.439	221.515	290.362	254.608	283.168	262.24	200.855	288.495	229.798	258.813	213.294	393.589	282.178	266.718	TRUE	TRUE	4	3	TRUE	244.49	296.354	-0.277542	-0.833158
607	1	NPM_MOUSE	NPM_MOUSE		47.9	292	32561	Nucleophosmin OS=Mus musculus GN=Npm1 PE=1 SV=1	1857	1857	1	216	176	210	225	458	265	307	216	176	210	225	458	265	307	216	176	210	225	458	265	307	193.239	213.294	217.853	200.855	346	346	330.464	263.958	TRUE	TRUE	4	3	TRUE	206.311	340.821	-0.724199	-2.20731
237	1	H2AX_MOUSE	H2AX_MOUSE		44.1	143	15144	Histone H2A.x OS=Mus musculus GN=H2afx PE=1 SV=2	8256	58	0.007	1502	814	576	1187	2467	831	879	8	8	9	10	6	9	8	507.422	90.08	154.47	516.78	492.364	125.411	113.512	380.834	85.0309	159.777	409.848	375.497	145.895	94.6279	235.93	TRUE	FALSE	4	3	TRUE	258.872	205.34	0.334225	1.16112
570	1	HNRPD_MOUSE	HNRPD_MOUSE		31.8	355	38355	Heterogeneous nuclear ribonucleoprotein D0 OS=Mus musculus GN=Hnrnpd PE=1 SV=2	1840	1159	0.63	353	200	186	365	320	195	221	226	123	118	217	216	111	148	319.694	173.439	159.088	321.371	278.511	167.416	194.875	288.495	196.597	164.477	272.277	229.798	229.798	203.041	226.355	TRUE	TRUE	4	3	TRUE	230.461	220.879	0.061268	0.445687
1067	1	ROAA_MOUSE	ROAA_MOUSE		36.8	285	30832	Heterogeneous nuclear ribonucleoprotein A/B OS=Mus musculus GN=Hnrnpab PE=1 SV=1	1754	1444	0.823	277	209	209	294	356	179	230	222	175	176	228	295	145	203	248.258	193.77	194.207	260.085	328.386	162.927	217.09	229.798	226.025	203.041	236.753	258.813	213.294	213.294	225.86	TRUE	TRUE	4	3	TRUE	223.904	228.467	-0.029105	0.170776
1102	1	SF3B1_MOUSE	SF3B1_MOUSE		51.8	1304	145817	Splicing factor 3B subunit 1 OS=Mus musculus GN=Sf3b1 PE=1 SV=1	1397	1397	1	113	225	262	177	166	177	277	113	225	262	177	166	177	277	113	225	262	177	166	177	277	115.72	272.277	330.464	174.472	145.895	236.753	288.495	223.44	TRUE	TRUE	4	3	TRUE	223.233	223.714	-0.00310545	0.257332
1273	1	RBP2_MOUSE	RBP2_MOUSE		40.1	3053	341092	E3 SUMO-protein ligase RanBP2 OS=Mus musculus GN=Ranbp2 PE=1 SV=1	1372	1372	1	109	219	229	78	182	233	322	109	219	229	78	182	233	322	109	219	229	78	182	233	322	111.883	258.813	258.813	85.0309	159.777	297.738	346	216.865	TRUE	TRUE	4	3	TRUE	178.635	267.839	-0.584348	-1.48944
728	1	MBB1A_MOUSE	MBB1A_MOUSE		48	1344	152038	Myb-binding protein 1A OS=Mus musculus GN=Mybbp1a PE=1 SV=2	1419	1419	1	121	153	230	142	236	211	326	121	153	230	142	236	211	326	121	153	230	142	236	211	326	126.517	159.777	263.132	145.895	184.791	254.569	375.497	215.74	TRUE	TRUE	4	3	TRUE	173.83	271.619	-0.643905	-1.67274
200	1	PTBP1_MOUSE	PTBP1_MOUSE		47.8	527	56479	Polypyrimidine tract-binding protein 1 OS=Mus musculus GN=Ptbp1 PE=1 SV=2	1597	1470	0.92	291	196	189	250	335	113	223	269	185	174	219	311	104	208	289.061	192.757	184.875	248.137	333.217	110.039	218.685	263.132	217.853	193.239	226.025	263.132	126.517	217.853	215.393	TRUE	TRUE	4	3	TRUE	225.062	202.501	0.152398	0.556837
1040	1	TADBP_MOUSE	TADBP_MOUSE		51.2	414	44549	TAR DNA-binding protein 43 OS=Mus musculus GN=Tardbp PE=1 SV=1	1527	1527	1	279	163	187	266	311	129	192	279	163	187	266	311	129	192	279	163	187	266	311	129	192	258.813	184.791	200.855	247.766	247.766	155.504	187.384	211.84	TRUE	TRUE	4	3	TRUE	223.057	196.884	0.18006	0.636791
436	1	HNRH2_MOUSE	HNRH2_MOUSE		41.6	449	49281	Heterogeneous nuclear ribonucleoprotein H2 OS=Mus musculus GN=Hnrnph2 PE=1 SV=1	1823	739	0.405	353	195	218	257	387	198	215	128	97	111	82	116	100	105	295.785	163.724	185.434	203.777	294.982	163.055	169.825	272.277	187.384	196.597	196.597	242.995	217.853	155.504	209.887	TRUE	TRUE	4	3	TRUE	213.214	205.451	0.0535073	0.305179
74	1	U5S1_MOUSE	U5S1_MOUSE		52.5	971	109362	116 kDa U5 small nuclear ribonucleoprotein component OS=Mus musculus GN=Eftud2 PE=2 SV=1	1346	1322	0.982	182	207	223	148	166	159	261	178	205	220	146	164	154	255	182	206.99	222.986	148	166	158.968	260.953	168.681	236.753	242.995	155.504	143.576	200.855	272.277	202.949	TRUE	TRUE	4	3	TRUE	200.983	205.57	-0.0325524	-0.00479525
256	1	FBRL_MOUSE	FBRL_MOUSE		45.9	327	34308	rRNA 2'-O-methyltransferase fibrillarin OS=Mus musculus GN=Fbl PE=1 SV=2	1448	1146	0.791	149	148	179	137	394	194	247	117	129	141	106	346	177	130	149	148	178.732	137	394	194	247	149.82	155.504	184.791	137.927	297.738	242.995	242.995	201.682	TRUE	TRUE	4	3	TRUE	157.01	261.243	-0.734532	-2.13073
471	1	HNRL2_MOUSE	HNRL2_MOUSE		39.2	745	85001	Heterogeneous nuclear ribonucleoprotein U-like protein 2 OS=Mus musculus GN=Hnrnpul2 PE=1 SV=1	1414	1414	1	243	159	164	293	228	157	170	243	159	164	293	228	157	170	243	159	164	293	228	157	170	217.853	174.472	174.472	263.132	180.347	193.239	159.777	194.756	TRUE	TRUE	4	3	TRUE	207.482	177.788	0.22283	0.725236
658	1	NOP58_MOUSE	NOP58_MOUSE		51.7	536	60344	Nucleolar protein 58 OS=Mus musculus GN=Nop58 PE=1 SV=1	1251	1251	1	91	207	234	141	179	158	241	91	207	234	141	179	158	241	91	207	234	141	179	158	241	101	242.995	282.178	143.576	151.903	196.597	229.798	192.578	TRUE	TRUE	4	3	TRUE	192.437	192.766	-0.00246279	0.103676
1375	1	UAP56_MOUSE	UAP56_MOUSE		47.9	428	49036	Spliceosome RNA helicase Bat1 OS=Mus musculus GN=Bat1 PE=1 SV=1	1421	658	0.463	210	161	187	258	251	144	210	70	80	76	125	144	68	95	189.512	137.857	154.111	238.095	240.3	126.727	186.807	180.347	145.895	155.504	213.294	193.239	149.82	184.791	174.699	TRUE	TRUE	4	3	TRUE	173.76	175.95	-0.0180704	-0.0153049
179	1	K2C8_MOUSE	K2C8_MOUSE		75.1	490	54566	Keratin, type II cytoskeletal 8 OS=Mus musculus GN=Krt8 PE=1 SV=4	1220	1036	0.849	201	175	225	184	197	109	129	181	144	184	168	168	83	108	200.814	174.347	224.362	183.918	195.449	108.009	128.146	187.384	200.855	247.766	180.347	168.681	120.285	117.449	174.681	TRUE	TRUE	4	3	TRUE	204.088	135.472	0.591201	1.54198
231	1	U2AF2_MOUSE	U2AF2_MOUSE		44.8	475	53518	Splicing factor U2AF 65 kDa subunit OS=Mus musculus GN=U2af2 PE=1 SV=3	1227	1227	1	246	110	129	262	246	111	123	246	110	129	262	246	111	123	246	110	129	262	246	111	123	226.025	114.045	123.576	242.995	200.855	127.733	110.224	163.636	TRUE	TRUE	4	3	TRUE	176.66	146.271	0.272337	0.671002
1387	1	HNRPF_MOUSE	HNRPF_MOUSE		43.6	415	45731	Heterogeneous nuclear ribonucleoprotein F OS=Mus musculus GN=Hnrnpf PE=1 SV=3	1455	669	0.46	280	153	164	239	335	114	170	97	97	107	87	123	57	101	216.854	132.86	143.111	193.148	258.476	83.136	138.472	196.597	140.707	140.707	187.384	217.853	85.0309	129.135	156.773	TRUE	TRUE	4	3	TRUE	166.349	144.006	0.208079	0.40698
543	1	DDX17_MOUSE	DDX17_MOUSE		45.1	650	72400	Probable ATP-dependent RNA helicase DDX17 OS=Mus musculus GN=Ddx17 PE=2 SV=1	1843	739	0.401	272	227	248	290	334	222	250	74	116	120	97	96	100	136	118.934	154.223	160.174	145.197	157.751	137.797	175.141	120.285	164.477	168.681	151.903	136.138	174.472	168.681	154.948	TRUE	TRUE	4	3	TRUE	151.336	159.764	-0.0781794	-0.450055
923	1	SF3A1_MOUSE	SF3A1_MOUSE		43.1	791	88546	Splicing factor 3A subunit 1 OS=Mus musculus GN=Sf3a1 PE=1 SV=1	1105	1105	1	236	124	139	115	215	140	136	236	124	139	115	215	140	136	236	124	139	115	215	140	136	213.294	127.733	129.135	118.894	174.472	180.347	121.934	152.258	TRUE	TRUE	4	3	TRUE	147.264	158.918	-0.109875	-0.438244
451	1	SFRS3_MOUSE	SFRS3_MOUSE		34.1	164	19331	Splicing factor, arginine/serine-rich 3 OS=Mus musculus GN=Sfrs3 PE=2 SV=1	1268	755	0.595	270	125	142	227	227	135	142	154	82	92	140	101	87	99	221.411	108.313	123.293	193.421	174.138	114.84	126.288	203.041	111.883	121.934	193.239	149.82	136.138	115.05	147.301	TRUE	TRUE	4	3	TRUE	157.524	133.669	0.236907	0.578785
1287	1	DDX21_MOUSE	DDX21_MOUSE		49.8	851	93583	Nucleolar RNA helicase 2 OS=Mus musculus GN=Ddx21 PE=1 SV=2	965	965	1	98	125	154	92	180	143	173	98	125	154	92	180	143	173	98	125	154	92	180	143	173	104.515	133.422	151.903	101.53	155.504	184.791	164.477	142.306	TRUE	TRUE	4	3	TRUE	122.843	168.257	-0.453856	-1.48519
438	1	ELAV1_MOUSE	ELAV1_MOUSE		49.1	326	36070	ELAV-like protein 1 OS=Mus musculus GN=Elavl1 PE=1 SV=1	962	962	1	116	163	174	122	128	75	184	116	163	174	122	128	75	184	116	163	174	122	128	75	184	117.449	180.347	180.347	127.733	115.05	74.4286	180.347	139.386	TRUE	TRUE	4	3	TRUE	151.469	123.275	0.29714	0.74451
484	1	TOP1_MOUSE	TOP1_MOUSE		36	767	90877	DNA topoisomerase 1 OS=Mus musculus GN=Top1 PE=1 SV=2	937	937	1	117	114	152	100	145	145	164	117	114	152	100	145	145	164	117	114	152	100	145	145	164	118.894	118.894	149.82	110.224	127.733	187.384	149.82	137.538	TRUE	TRUE	4	3	TRUE	124.458	154.979	-0.316411	-1.18779
154	1	K1C18_MOUSE	K1C18_MOUSE		66.9	423	47539	Keratin, type I cytoskeletal 18 OS=Mus musculus GN=Krt18 PE=1 SV=5	922	888	0.963	121	142	209	109	129	102	110	113	135	198	109	126	98	109	119.642	141.71	208.338	109	128.259	101.941	110	121.934	151.903	213.294	114.045	118.894	108.592	91.5699	131.462	TRUE	TRUE	4	3	TRUE	150.294	106.352	0.498943	1.38596
1237	1	ECHP_MOUSE	ECHP_MOUSE		48.1	718	78244	Peroxisomal bifunctional enzyme OS=Mus musculus GN=Ehhadh PE=1 SV=3	864	864	1	110	175	180	83	81	108	127	110	175	180	83	81	108	127	110	175	180	83	81	108	127	112.903	203.041	187.384	91.5699	82.2967	118.894	115.72	130.258	TRUE	TRUE	4	3	TRUE	148.724	105.637	0.493526	1.25901
1323	1	PO210_MOUSE	PO210_MOUSE		33.1	1886	204102	Nuclear pore membrane glycoprotein 210 OS=Mus musculus GN=Nup210 PE=1 SV=2	862	862	1	100	126	141	118	105	135	137	100	126	141	118	105	135	137	100	126	141	118	105	135	137	106.809	136.138	136.138	121.934	101.53	159.777	126.517	126.978	TRUE	TRUE	4	3	TRUE	125.255	129.275	-0.0455775	-0.414767
343	1	ACTB_MOUSE	ACTB_MOUSE		50.4	375	41738	Actin, cytoplasmic 1 OS=Mus musculus GN=Actb PE=1 SV=1	983	563	0.573	152	137	135	166	128	110	155	95	74	78	85	77	47	107	142	117.714	113.11	164.025	117.776	102.868	136.349	140.707	121.934	114.045	164.477	106.809	111.883	123.576	126.204	TRUE	TRUE	4	3	TRUE	135.291	114.089	0.2459	0.463995
645	1	TOP2B_MOUSE	TOP2B_MOUSE		38.8	1612	181910	DNA topoisomerase 2-beta OS=Mus musculus GN=Top2b PE=1 SV=2	821	646	0.787	60	155	145	86	77	118	180	52	122	112	67	63	86	144	59.849	155	145	86	77	118	179.507	70.8327	168.681	143.576	94.6279	76.8989	140.707	174.472	124.256	TRUE	TRUE	4	3	TRUE	119.429	130.693	-0.130021	-0.653406
1315	1	SON_MOUSE	SON_MOUSE		24.8	2404	261432	Protein SON OS=Mus musculus GN=Son PE=1 SV=1	795	795	1	90	127	112	61	129	137	139	90	127	112	61	129	137	139	90	127	112	61	129	137	139	98.321	137.927	111.883	72.7443	120.285	168.681	133.422	120.466	TRUE	TRUE	4	3	TRUE	105.219	140.796	-0.420211	-1.51622
502	1	HP1B3_MOUSE	HP1B3_MOUSE		50.9	554	60868	Heterochromatin protein 1-binding protein 3 OS=Mus musculus GN=Hp1bp3 PE=1 SV=1	840	840	1	122	117	104	145	127	103	122	122	117	104	145	127	103	122	122	117	104	145	127	103	122	129.135	120.285	101	149.82	114.045	112.903	108.592	119.397	TRUE	TRUE	4	3	TRUE	125.06	111.846	0.161098	0.188392
1278	1	DKC1_MOUSE	DKC1_MOUSE		36.9	509	57503	H/ACA ribonucleoprotein complex subunit 4 OS=Mus musculus GN=Dkc1 PE=1 SV=3	837	837	1	110	110	145	94	153	77	148	110	110	145	94	153	77	148	110	110	145	94	153	77	148	114.045	115.05	145.895	104.515	133.422	75.3866	143.576	118.841	TRUE	TRUE	4	3	TRUE	119.876	117.461	0.0293612	-0.169285
378	1	SMD2_MOUSE	SMD2_MOUSE		54.2	118	13528	Small nuclear ribonucleoprotein Sm D2 OS=Mus musculus GN=Snrpd2 PE=2 SV=1	864	864	1	150	92	75	176	189	102	80	150	92	75	176	189	102	80	150	92	75	176	189	102	80	151.903	90.529	69.5597	168.681	164.477	109.228	60.8936	116.467	TRUE	TRUE	4	3	TRUE	120.168	111.533	0.107589	0.00351301
616	1	SNRPA_MOUSE	SNRPA_MOUSE		27.9	287	31836	U1 small nuclear ribonucleoprotein A OS=Mus musculus GN=Snrpa PE=2 SV=3	801	706	0.881	132	98	99	66	130	163	113	126	82	79	51	127	145	96	131.953	95.253	95.989	65.167	129.886	161.111	110.442	133.422	94.6279	91.5699	75.3866	121.934	203.041	92.7456	116.104	TRUE	TRUE	4	3	TRUE	98.7515	139.24	-0.4957	-1.92136
846	1	RBM14_MOUSE	RBM14_MOUSE		42.2	669	69450	RNA-binding protein 14 OS=Mus musculus GN=Rbm14 PE=1 SV=1	807	807	1	121	111	121	131	128	97	98	121	111	121	131	128	97	98	121	111	121	131	128	97	98	127.733	115.72	118.894	133.422	117.449	102.399	85.0309	114.378	TRUE	TRUE	4	3	TRUE	123.942	101.626	0.286393	0.579658
273	1	H15_MOUSE	H15_MOUSE		30	223	22577	Histone H1.5 OS=Mus musculus GN=Hist1h1b PE=1 SV=2	910	809	0.889	155	105	73	238	172	85	82	137	85	66	218	159	70	74	143.227	92.915	69.164	226.685	164.978	75.988	77.847	143.576	92.7456	59.1663	203.041	140.707	74.9387	59.5173	110.527	TRUE	TRUE	4	3	TRUE	124.632	91.721	0.442354	1.24569
513	1	FUBP2_MOUSE	FUBP2_MOUSE		49.2	748	76811	Far upstream element-binding protein 2 OS=Mus musculus GN=Khsrp PE=1 SV=1	758	749	0.988	85	138	133	159	59	88	96	85	135	132	158	58	88	93	85	137.873	132.974	158.972	58.928	88	95.847	96.1667	149.82	127.733	159.777	62.9924	91.5699	84.393	110.35	TRUE	TRUE	4	3	TRUE	133.374	79.6518	0.743701	2.45974
295	1	ROA1_MOUSE	ROA1_MOUSE		55.6	320	34197	Heterogeneous nuclear ribonucleoprotein A1 OS=Mus musculus GN=Hnrnpa1 PE=1 SV=2	957	756	0.79	155	121	124	157	171	91	138	113	99	93	128	141	68	114	119.681	103.2	99.165	133.375	146.078	72.151	118.944	123.576	108.592	94.6279	136.138	129.135	70.8327	102.399	109.328	TRUE	TRUE	4	3	TRUE	115.733	100.789	0.19947	0.414832
520	1	PUF60_MOUSE	PUF60_MOUSE		39	564	60250	Poly(U)-binding-splicing factor PUF60 OS=Mus musculus GN=Puf60 PE=2 SV=2	772	772	1	111	103	111	119	124	85	119	111	103	111	119	124	85	119	111	103	111	119	124	85	119	115.05	106.809	109.228	123.576	111.883	89.0204	103.537	108.443	TRUE	TRUE	4	3	TRUE	113.666	101.48	0.163601	0.306837
1289	1	ACINU_MOUSE	ACINU_MOUSE		25.8	1338	150692	Apoptotic chromatin condensation inducer in the nucleus OS=Mus musculus GN=Acin1 PE=1 SV=2	733	733	1	82	102	109	99	108	102	131	82	102	109	99	108	102	131	82	102	109	99	108	102	131	94.6279	103.537	108.592	109.228	103.537	110.224	120.285	107.147	TRUE	TRUE	4	3	TRUE	103.996	111.348	-0.0985543	-0.719687
90	1	HNRPG_MOUSE	HNRPG_MOUSE		36.3	388	42235	Heterogeneous nuclear ribonucleoprotein G OS=Mus musculus GN=Rbmx PE=1 SV=1	732	725	0.99	106	102	105	112	107	99	101	105	101	104	111	106	98	100	105.868	101.711	105	112	106.848	98.731	100.685	109.228	101.53	101.53	115.05	102.399	103.537	88.0116	103.041	TRUE	TRUE	4	3	TRUE	106.835	97.9823	0.124785	0.0116878
1047	1	TOIP1_MOUSE	TOIP1_MOUSE		52.5	520	58416	Torsin-1A-interacting protein 1 OS=Mus musculus GN=Tor1aip1 PE=1 SV=1	688	688	1	134	121	91	42	87	115	98	134	121	91	42	87	115	98	134	121	91	42	87	115	98	136.138	126.517	86.715	54.8413	86.715	137.927	86.715	102.224	TRUE	TRUE	4	3	TRUE	101.053	103.786	-0.0384988	-0.448798
546	1	TR150_MOUSE	TR150_MOUSE		26.9	951	108179	Thyroid hormone receptor-associated protein 3 OS=Mus musculus GN=Thrap3 PE=1 SV=1	683	674	0.987	65	109	114	92	60	126	117	65	107	113	92	60	121	116	65	108.456	113.753	92	60	124.805	116.716	75.3866	112.903	115.05	101	63.9553	143.576	98.321	101.456	TRUE	TRUE	4	3	TRUE	101.085	101.951	-0.0123062	-0.231323
1081	1	PRP19_MOUSE	PRP19_MOUSE		46.2	504	55240	Pre-mRNA-processing factor 19 OS=Mus musculus GN=Prpf19 PE=2 SV=1	714	714	1	97	91	103	103	111	92	117	97	91	103	103	111	92	117	97	91	103	103	111	92	117	103.537	89.0204	98.321	111.883	104.515	94.6279	101	100.415	TRUE	TRUE	4	3	TRUE	100.69	100.048	0.00923647	-0.16833
757	1	SAFB2_MOUSE	SAFB2_MOUSE		30.6	991	111839	Scaffold attachment factor B2 OS=Mus musculus GN=Safb2 PE=1 SV=2	751	751	1	175	73	77	112	160	84	70	175	73	77	112	160	84	70	175	73	77	112	160	84	70	164.477	69.5597	74.4286	115.72	137.927	88.0116	52.2963	100.346	TRUE	TRUE	4	3	TRUE	106.046	92.745	0.193352	0.409941
429	1	IMB1_MOUSE	IMB1_MOUSE		39.6	876	97153	Importin subunit beta-1 OS=Mus musculus GN=Kpnb1 PE=1 SV=1	698	698	1	92	96	141	65	82	97	125	92	96	141	65	82	97	125	92	96	141	65	82	97	125	101.53	95.2719	133.422	74.4286	83.1039	101.53	112.903	100.313	TRUE	TRUE	4	3	TRUE	101.163	99.1789	0.0285787	-0.0175881
402	1	UBIQ_MOUSE	UBIQ_MOUSE		61.8	76	8566	Ubiquitin OS=Mus musculus GN=Rps27a PE=1 SV=1	740	740	1	138	84	79	137	144	81	77	138	84	79	137	144	81	77	138	84	79	137	144	81	77	137.927	78.5714	77.4976	140.707	126.517	81.6616	58.7143	100.228	TRUE	TRUE	4	3	TRUE	108.676	88.9642	0.288733	0.820727
1100	1	SRRT_MOUSE	SRRT_MOUSE		31	875	100453	Serrate RNA effector molecule homolog OS=Mus musculus GN=Srrt PE=1 SV=1	677	677	1	73	124	113	70	77	109	111	73	124	113	70	77	109	111	73	124	113	70	77	109	111	83.1039	129.135	112.903	78.5714	77.4976	123.576	93.5714	99.7653	TRUE	TRUE	4	3	TRUE	100.928	98.2149	0.0393141	0.0808963
657	1	CDC5L_MOUSE	CDC5L_MOUSE		41.5	802	92191	Cell division cycle 5-related protein OS=Mus musculus GN=Cdc5l PE=1 SV=2	693	693	1	105	92	99	97	128	82	90	105	92	99	97	128	82	90	105	92	99	97	128	82	90	108.592	91.5699	93.5714	106.809	115.72	83.6824	78.5714	96.9308	TRUE	TRUE	4	3	TRUE	100.135	92.658	0.111965	0.419825
1001	1	IF4A3_MOUSE	IF4A3_MOUSE		60.3	411	46841	Eukaryotic initiation factor 4A-III OS=Mus musculus GN=Eif4a3 PE=1 SV=3	663	544	0.821	61	102	109	94	77	99	121	54	77	85	89	75	70	94	61	102	108.448	94	77	99	120.438	72.1143	102.399	106.809	103.537	77.2857	104.515	106.809	96.2098	TRUE	TRUE	4	3	TRUE	96.2146	96.2032	0.000171019	0.136215
805	1	SFRS7_MOUSE	SFRS7_MOUSE		21.7	267	30819	Splicing factor, arginine/serine-rich 7 OS=Mus musculus GN=Sfrs7 PE=1 SV=1	1012	499	0.493	227	95	105	175	199	111	100	111	52	55	88	73	63	57	159.589	68.687	73.707	121.579	125.862	83.16	72.712	155.504	63.9553	66.9744	126.517	112.903	86.715	55.8031	95.4816	TRUE	TRUE	4	3	TRUE	103.238	85.1402	0.278055	1.05402
202	1	UDB17_MOUSE	UDB17_MOUSE		33.4	530	60857	UDP-glucuronosyltransferase 2B17 OS=Mus musculus GN=Ugt2b17 PE=2 SV=1	688	545	0.792	36	92	138	54	96	112	160	36	61	102	53	89	88	116	36	77.21	123.051	53.869	94.465	105.041	146.49	51.5499	72.7443	120.285	67.4711	94.6279	115.72	137.927	94.3322	TRUE	TRUE	4	3	TRUE	78.0125	116.092	-0.573487	-1.6775
689	1	CHD4_MOUSE	CHD4_MOUSE		37	1915	217752	Chromodomain-helicase-DNA-binding protein 4 OS=Mus musculus GN=Chd4 PE=1 SV=1	625	625	1	22	119	131	20	54	113	166	22	119	131	20	54	113	166	22	119	131	20	54	113	166	32.7143	123.576	126.517	32.4506	59.1663	133.422	151.903	94.2499	TRUE	TRUE	4	3	TRUE	78.8144	114.831	-0.542976	-1.42878
991	1	RBM39_MOUSE	RBM39_MOUSE		35.3	530	59495	RNA-binding protein 39 OS=Mus musculus GN=Rbm39 PE=1 SV=1	661	661	1	82	91	93	115	95	65	120	82	91	93	115	95	65	120	82	91	93	115	95	65	120	93.5714	88.0116	88.0116	120.285	96.1667	62.9924	104.515	93.3648	TRUE	TRUE	4	3	TRUE	97.4699	87.8914	0.149234	0.724863
624	1	RU17_MOUSE	RU17_MOUSE		42	448	51993	U1 small nuclear ribonucleoprotein 70 kDa OS=Mus musculus GN=Snrnp70 PE=1 SV=2	648	648	1	72	97	77	81	121	109	91	72	97	77	81	121	109	91	72	97	77	81	121	109	91	81.6616	96.1667	73.5903	89.0204	108.592	121.934	80.0117	92.9966	TRUE	TRUE	4	3	TRUE	85.1098	103.512	-0.282406	-0.623226
379	1	SMD3_MOUSE	SMD3_MOUSE		47.6	126	13917	Small nuclear ribonucleoprotein Sm D3 OS=Mus musculus GN=Snrpd3 PE=1 SV=1	626	626	1	69	63	80	88	61	71	194	69	63	80	88	61	71	194	69	63	80	88	61	71	194	78.5714	58.7143	78.5714	98.321	64.8309	69.1649	200.855	92.7184	TRUE	TRUE	4	3	TRUE	78.5445	111.617	-0.506974	-1.30001
167	1	EF1A1_MOUSE	EF1A1_MOUSE		39.8	462	50115	Elongation factor 1-alpha 1 OS=Mus musculus GN=Eef1a1 PE=1 SV=3	627	627	1	32	137	118	94	57	65	124	32	137	118	94	57	65	124	32	137	118	94	57	65	124	46.2204	143.576	117.449	102.399	61.2857	62.5714	111.883	92.1978	TRUE	TRUE	4	3	TRUE	102.411	78.58	0.382138	1.45523
233	1	RSMB_MOUSE	RSMB_MOUSE		19.5	231	23657	Small nuclear ribonucleoprotein-associated protein B OS=Mus musculus GN=Snrpb PE=1 SV=1	677	677	1	165	57	76	123	133	58	65	165	57	76	123	133	58	65	165	57	76	123	133	58	65	159.777	50.0393	71.2957	129.135	123.576	54.8413	50.0393	91.2433	TRUE	TRUE	4	3	TRUE	102.562	76.1521	0.429537	1.73226
795	1	NUP93_MOUSE	NUP93_MOUSE		50.7	819	93282	Nuclear pore complex protein Nup93 OS=Mus musculus GN=Nup93 PE=2 SV=1	570	570	1	40	112	86	34	56	96	146	40	112	86	34	56	96	146	40	112	86	34	56	96	146	54.8413	117.449	84.393	45.7143	60.2294	98.321	136.138	85.2981	TRUE	TRUE	4	3	TRUE	75.5995	98.2295	-0.377779	-0.698949
362	1	PP1A_MOUSE	PP1A_MOUSE		56.7	330	37541	Serine/threonine-protein phosphatase PP1-alpha catalytic subunit OS=Mus musculus GN=Ppp1ca PE=1 SV=1	662	105	0.159	44	115	99	53	60	146	145	10	21	15	8	13	22	16	40.909	103.727	71.4	48	49.412	127.417	116.333	56.6173	109.228	62.9924	62.9924	56.6173	151.903	96.1667	85.2168	TRUE	FALSE	4	3	TRUE	72.9575	101.562	-0.477239	-0.330154
97	1	HNRH1_MOUSE	HNRH1_MOUSE		41.6	449	49200	Heterogeneous nuclear ribonucleoprotein H OS=Mus musculus GN=Hnrnph1 PE=1 SV=3	1836	253	0.138	370	172	180	312	409	183	210	25	35	36	24	29	47	57	82.361	69.416	69.455	84.075	94.542	93.809	107.703	95.2719	64.8309	60.2079	92.7456	95.2719	96.1667	90.529	85.0034	TRUE	FALSE	4	3	TRUE	78.264	93.9892	-0.264145	-0.000725975
1201	1	SF3A3_MOUSE	SF3A3_MOUSE		37.9	501	58843	Splicing factor 3A subunit 3 OS=Mus musculus GN=Sf3a3 PE=2 SV=2	586	586	1	75	86	100	63	58	78	126	75	86	100	63	58	78	126	75	86	100	63	58	78	126	85.0309	80.5804	96.1667	73.5903	62.5714	77.2857	114.045	84.1815	TRUE	TRUE	4	3	TRUE	83.8421	84.6341	-0.0135654	0.423303
1103	1	NU155_MOUSE	NU155_MOUSE		30.2	1391	155119	Nuclear pore complex protein Nup155 OS=Mus musculus GN=Nup155 PE=1 SV=1	556	556	1	30	95	105	28	31	106	161	30	95	105	28	31	106	161	30	95	105	28	31	106	161	44.511	93.5714	102.399	40.1184	38.8089	117.449	145.895	83.2505	TRUE	TRUE	4	3	TRUE	70.1499	100.718	-0.521807	-0.312534
1186	1	NH2L1_MOUSE	NH2L1_MOUSE		46.9	128	14175	NHP2-like protein 1 OS=Mus musculus GN=Nhp2l1 PE=2 SV=4	590	590	1	55	77	85	85	121	78	89	55	77	85	85	121	78	89	55	77	85	85	121	78	89	66.1556	72.1143	83.1039	93.5714	109.228	76.8989	77.4976	82.6528	TRUE	TRUE	4	3	TRUE	78.7363	87.8748	-0.15842	0.17423
1376	1	ILF3_MOUSE	ILF3_MOUSE		44.9	898	96022	Interleukin enhancer-binding factor 3 OS=Mus musculus GN=Ilf3 PE=1 SV=2	583	431	0.739	74	91	108	68	71	82	89	56	67	76	53	51	65	63	73.684	90.304	106.025	68	71	81.014	86.07	83.6824	86.715	103.537	77.2857	72.9667	82.2967	71.2957	82.5398	TRUE	TRUE	4	3	TRUE	87.8049	75.5197	0.217449	0.724662
1007	1	MGST1_MOUSE	MGST1_MOUSE		26.5	155	17553	Microsomal glutathione S-transferase 1 OS=Mus musculus GN=Mgst1 PE=1 SV=3	582	582	1	72	62	114	76	79	61	118	72	62	114	76	79	61	118	72	62	114	76	79	61	118	82.2967	57.178	115.72	82.2967	80.0117	58.7143	101.53	82.5354	TRUE	TRUE	4	3	TRUE	84.3729	80.0854	0.0752407	0.438328
686	1	SMRC2_MOUSE	SMRC2_MOUSE		27.8	1213	132605	SWI/SNF complex subunit SMARCC2 OS=Mus musculus GN=Smarcc2 PE=1 SV=2	568	424	0.746	49	91	88	62	75	109	94	42	61	64	54	60	75	68	48.255	88.727	85.943	61.714	74.286	104.31	90.667	60.8936	83.1039	83.6824	72.9667	74.9387	115.05	78.9424	81.3683	TRUE	TRUE	4	3	TRUE	75.1616	89.6438	-0.254207	-0.0686421
1030	1	PRP6_MOUSE	PRP6_MOUSE		39.7	941	106723	Pre-mRNA-processing factor 6 OS=Mus musculus GN=Prpf6 PE=2 SV=1	548	548	1	32	97	112	37	62	79	129	32	97	112	37	62	79	129	32	97	112	37	62	79	129	47.625	98.321	110.224	47.625	66.9744	78.5714	118.894	81.1764	TRUE	TRUE	4	3	TRUE	75.9488	88.1467	-0.21488	0.0271779
1080	1	NEUA_MOUSE	NEUA_MOUSE		41	432	48059	N-acylneuraminate cytidylyltransferase OS=Mus musculus GN=Cmas PE=1 SV=2	569	569	1	49	62	73	76	94	93	122	49	62	73	76	94	93	122	49	62	73	76	94	93	122	62.1429	57.5714	66.1556	83.1039	93.5714	95.2719	109.228	81.0064	TRUE	TRUE	4	3	TRUE	67.2434	99.357	-0.563229	-0.466505
194	1	H12_MOUSE	H12_MOUSE		43.9	212	21268	Histone H1.2 OS=Mus musculus GN=Hist1h1c PE=1 SV=2	2950	12	0.004	659	328	213	636	608	286	220	0	4	0	0	1	6	1	0	102.495	0	0	401.058	103.207	56.945	0	104.515	0	0	303.825	114.045	41.1053	80.4987	TRUE	FALSE	4	3	TRUE	26.1288	152.992	-2.54974	-3.43606
126	1	ZN326_MOUSE	ZN326_MOUSE		33.8	580	65226	Zinc finger protein 326 OS=Mus musculus GN=Znf326 PE=1 SV=1	570	570	1	66	90	100	80	67	82	85	66	90	100	80	67	82	85	66	90	100	80	67	82	85	76.8989	83.6824	95.2719	86.715	69.5597	83.1039	66.1556	80.1982	TRUE	TRUE	4	3	TRUE	85.642	72.9397	0.231615	0.629716
109	1	BAF_MOUSE	BAF_MOUSE		56.2	89	10104	Barrier-to-autointegration factor OS=Mus musculus GN=Banf1 PE=1 SV=1	580	580	1	189	66	38	43	92	97	55	189	66	38	43	92	97	55	189	66	38	43	92	97	55	174.472	62.1429	30.65	56.6173	90.529	101	38.6009	79.1446	TRUE	TRUE	4	3	TRUE	80.9705	76.71	0.0779833	0.391894
410	1	HMGB1_MOUSE	HMGB1_MOUSE		31.2	215	24895	High mobility group protein B1 OS=Mus musculus GN=Hmgb1 PE=1 SV=2	541	442	0.817	9	47	72	50	98	70	195	8	34	55	38	79	57	171	8.889	44.78	69.385	49.4	97.531	68.4	193.674	14.459	37.851	59.5173	64.8309	98.321	66.1556	196.597	76.8188	TRUE	TRUE	4	3	TRUE	44.1645	120.358	-1.44637	-1.84595
65	1	THOC4_MOUSE	THOC4_MOUSE		50.6	255	26941	THO complex subunit 4 OS=Mus musculus GN=Thoc4 PE=1 SV=3	544	264	0.485	63	69	79	114	61	63	95	23	40	48	45	14	34	60	63	67.619	77.76	114	61	61.389	92.813	73.5903	62.9924	76.8989	117.449	64.2857	59.5173	80.5804	76.4735	TRUE	TRUE	4	3	TRUE	82.7328	68.1278	0.280215	0.593344
251	1	LA_MOUSE	LA_MOUSE		39.8	415	47757	Lupus La protein homolog OS=Mus musculus GN=Ssb PE=2 SV=1	537	537	1	60	72	75	105	78	62	85	60	72	75	105	78	62	85	60	72	75	105	78	62	85	71.2957	67.9446	69.1649	112.903	78.5714	60.2079	66.9744	75.2945	TRUE	TRUE	4	3	TRUE	80.3269	68.5846	0.228	0.524971
1156	1	ILF2_MOUSE	ILF2_MOUSE		46.4	390	43063	Interleukin enhancer-binding factor 2 OS=Mus musculus GN=Ilf2 PE=1 SV=1	539	539	1	109	63	85	86	75	51	70	109	63	85	86	75	51	70	109	63	85	86	75	51	70	110.224	59.5173	82.2967	95.2719	75.3866	47.8571	52.576	74.7328	TRUE	TRUE	4	3	TRUE	86.8275	58.6066	0.567089	0.976454
646	1	H2A2B_MOUSE	H2A2B_MOUSE		63.1	130	14014	Histone H2A type 2-B OS=Mus musculus GN=Hist2h2ab PE=1 SV=3	3655	38	0.01	764	417	403	594	647	424	406	0	16	6	0	0	6	10	0	168.08	107.111	0	0	88.787	138.155	0.428571	193.239	104.515	0.642857	0.428571	92.7456	127.733	74.2476	TRUE	FALSE	4	3	TRUE	74.7065	73.6356	0.02083	0.208985
596	1	EWS_MOUSE	EWS_MOUSE		15.1	655	68419	RNA-binding protein EWS OS=Mus musculus GN=Ewsr1 PE=1 SV=1	517	517	1	59	78	74	56	69	101	80	59	78	74	56	69	101	80	59	78	74	56	69	101	80	70.2824	72.9667	67.4711	68.6657	70.8327	106.809	61.447	74.0678	TRUE	TRUE	4	3	TRUE	69.8465	79.6962	-0.190323	-0.0890068
1140	1	SMC1A_MOUSE	SMC1A_MOUSE		39.7	1233	143217	Structural maintenance of chromosomes protein 1A OS=Mus musculus GN=Smc1a PE=1 SV=3	488	488	1	32	104	94	42	41	80	95	32	104	94	42	41	80	95	32	104	94	42	41	80	95	48.2857	110.224	90.529	55.4286	48.5187	80.5804	83.6824	73.8927	TRUE	TRUE	4	3	TRUE	76.1168	70.9272	0.101877	0.314989
1037	1	SP16H_MOUSE	SP16H_MOUSE		29.9	1047	119826	FACT complex subunit SPT16 OS=Mus musculus GN=Supt16h PE=1 SV=2	508	508	1	56	79	97	40	66	85	85	56	79	97	40	66	85	85	56	79	97	40	66	85	85	67.9446	73.5903	92.7456	50.0393	68.6657	90.529	69.1649	73.2399	TRUE	TRUE	4	3	TRUE	71.0799	76.1199	-0.0988306	-0.00730928
333	1	RU2A_MOUSE	RU2A_MOUSE		54.9	255	28358	U2 small nuclear ribonucleoprotein A' OS=Mus musculus GN=Snrpa1 PE=1 SV=2	518	518	1	72	80	82	77	58	66	83	72	80	82	77	58	66	83	72	80	82	77	58	66	83	80.5804	74.4286	80.0117	83.6824	62.1429	63.9553	64.8309	72.8046	TRUE	TRUE	4	3	TRUE	79.6758	63.643	0.324139	0.730751
619	1	RU1C_MOUSE	RU1C_MOUSE		24.5	159	17365	U1 small nuclear ribonucleoprotein C OS=Mus musculus GN=Snrpc PE=2 SV=1	519	519	1	82	65	58	71	94	61	88	82	65	58	71	94	61	88	82	65	58	71	94	61	88	92.7456	60.8936	47.8571	80.0117	92.7456	57.178	74.4286	72.2657	TRUE	TRUE	4	3	TRUE	70.377	74.784	-0.0876265	-0.27636
77	1	HDAC1_MOUSE	HDAC1_MOUSE		32.6	482	55076	Histone deacetylase 1 OS=Mus musculus GN=Hdac1 PE=1 SV=1	560	364	0.65	80	68	95	62	88	87	80	55	44	61	36	62	54	52	77.541	59.529	84.568	58.829	82.15	73.161	69.756	86.715	54.4506	81.6616	70.8327	83.6824	72.1143	51.9391	71.628	TRUE	TRUE	4	3	TRUE	73.415	69.2453	0.0843583	0.147476
373	1	RUXE_MOUSE	RUXE_MOUSE		52.2	92	10805	Small nuclear ribonucleoprotein E OS=Mus musculus GN=Snrpe PE=2 SV=1	517	517	1	144	43	44	98	105	40	43	144	43	44	98	105	40	43	144	43	44	98	105	40	43	145.895	36.627	36.378	108.592	101	36.8536	29.5617	70.701	TRUE	TRUE	4	3	TRUE	81.873	55.8051	0.552991	1.6557
1343	1	PR40A_MOUSE	PR40A_MOUSE		24.2	953	108482	Pre-mRNA-processing factor 40 homolog A OS=Mus musculus GN=Prpf40a PE=1 SV=1	488	488	1	49	64	74	50	89	78	84	49	64	74	50	89	78	84	49	64	74	50	89	78	84	62.9924	60.2294	67.9446	66.1556	88.0116	77.4976	65.5714	69.7718	TRUE	TRUE	4	3	TRUE	64.3305	77.0269	-0.259859	-1.14764
634	1	RALY_MOUSE	RALY_MOUSE		60.9	312	33159	RNA-binding protein Raly OS=Mus musculus GN=Raly PE=1 SV=2	483	483	1	80	68	78	78	61	66	52	80	68	78	78	61	66	52	80	68	78	78	61	66	52	91.5699	63.5714	77.2857	84.393	65.5714	64.2857	36.8536	69.0758	TRUE	TRUE	4	3	TRUE	79.205	55.5702	0.511279	1.57903
1052	1	GLYR1_MOUSE	GLYR1_MOUSE		44	546	59717	Putative oxidoreductase GLYR1 OS=Mus musculus GN=Glyr1 PE=2 SV=1	471	471	1	57	83	75	44	50	74	88	57	83	75	44	50	74	88	57	83	75	44	50	74	88	69.1649	77.4976	70.8327	60.2079	57.178	73.5903	74.9387	69.0586	TRUE	TRUE	4	3	TRUE	69.4258	68.569	0.0179144	-0.0198818
690	1	SNR40_MOUSE	SNR40_MOUSE		46.9	358	39277	U5 small nuclear ribonucleoprotein 40 kDa protein OS=Mus musculus GN=Snrnp40 PE=2 SV=1	476	476	1	68	83	68	29	50	89	89	68	83	68	29	50	89	89	68	83	68	29	50	89	89	77.2857	77.2857	57.5714	41	56.8067	93.5714	77.2857	68.6867	TRUE	TRUE	4	3	TRUE	63.2857	75.888	-0.261991	-1.06729
985	1	RCC1_MOUSE	RCC1_MOUSE		39.4	421	44932	Regulator of chromosome condensation OS=Mus musculus GN=Rcc1 PE=1 SV=1	491	491	1	93	63	53	49	92	61	80	93	63	53	49	92	61	80	93	63	53	49	92	61	80	102.399	59.1663	42.6954	63.9553	91.5699	58.3	62.5714	68.6653	TRUE	TRUE	4	3	TRUE	67.054	70.8138	-0.0787071	-0.451337
1388	1	SNUT1_MOUSE	SNUT1_MOUSE		46.5	806	90886	U4/U6.U5 tri-snRNP-associated protein 1 OS=Mus musculus GN=Sart1 PE=2 SV=1	465	465	1	48	75	82	46	56	71	87	48	75	82	46	56	71	87	48	75	82	46	56	71	87	60.2294	71.2957	80.5804	61.447	60.8936	70.2824	72.9667	68.2422	TRUE	TRUE	4	3	TRUE	68.3881	68.0476	0.00720254	-0.173351
59	1	RBM25_MOUSE	RBM25_MOUSE		31.3	841	99927	RNA-binding protein 25 OS=Mus musculus GN=Rbm25 PE=1 SV=1	485	485	1	80	61	70	38	80	67	89	80	61	70	38	80	67	89	80	61	70	38	80	67	89	89.0204	55.4286	60.8936	48.5187	80.5804	65.4517	76.8989	68.1132	TRUE	TRUE	4	3	TRUE	63.4653	74.3103	-0.227594	-1.04976
1286	1	DAZP1_MOUSE	DAZP1_MOUSE		26.6	406	43215	DAZ-associated protein 1 OS=Mus musculus GN=Dazap1 PE=2 SV=2	463	463	1	46	101	86	58	42	52	78	46	101	86	58	42	52	78	46	101	86	58	42	52	78	59.5173	101	85.0309	70.2824	51.5499	48.8401	60.2294	68.0643	TRUE	TRUE	4	3	TRUE	78.9576	53.5398	0.560467	1.54867
1161	1	GAR1_MOUSE	GAR1_MOUSE		30.3	231	23475	H/ACA ribonucleoprotein complex subunit 1 OS=Mus musculus GN=Gar1 PE=2 SV=1	475	475	1	20	90	93	40	51	66	115	20	90	93	40	51	66	115	20	90	93	40	51	66	115	30.8417	84.393	89.0204	50.5783	57.5714	64.8309	95.2719	67.5011	TRUE	TRUE	4	3	TRUE	63.7084	72.558	-0.187653	-0.927689
726	1	DEK_MOUSE	DEK_MOUSE		35.8	380	43160	Protein DEK OS=Mus musculus GN=Dek PE=1 SV=1	480	480	1	69	62	58	72	73	60	86	69	62	58	72	73	60	86	69	62	58	72	73	60	86	78.9424	56.6173	48.2857	81.6616	74.4286	56.6173	70.2824	66.6908	TRUE	TRUE	4	3	TRUE	66.3767	67.1094	-0.0158375	-0.35185
1036	1	SMCA5_MOUSE	SMCA5_MOUSE		33.4	1051	121628	SWI/SNF-related matrix-associated actin-dependent regulator of chromatin subfamily A member 5 OS=Mus musculus GN=Smarca5 PE=1 SV=1	453	453	1	36	84	77	33	55	74	94	36	84	77	33	55	74	94	36	84	77	33	55	74	94	51.9391	78.9424	74.9387	44.9953	59.5173	72.9667	82.2967	66.5138	TRUE	TRUE	4	3	TRUE	62.7039	71.5936	-0.191275	-0.837371
342	1	PCBP1_MOUSE	PCBP1_MOUSE		54.5	356	37499	Poly(rC)-binding protein 1 OS=Mus musculus GN=Pcbp1 PE=1 SV=1	561	360	0.642	85	79	68	92	100	71	66	54	55	39	62	64	44	42	71.082	70.172	54.493	80.058	84.571	59.231	56.609	80.0117	66.9744	43.6576	88.0116	84.393	55.8031	41	65.6931	TRUE	TRUE	4	3	TRUE	69.6638	60.3987	0.205892	0.514086
875	1	CCAR1_MOUSE	CCAR1_MOUSE		23.7	1146	132061	Cell division cycle and apoptosis regulator protein 1 OS=Mus musculus GN=Ccar1 PE=1 SV=1	459	459	1	49	65	72	41	69	69	94	49	65	72	41	69	69	94	49	65	72	41	69	69	94	61.447	61.447	64.2857	51.7389	71.2957	67.4711	81.6616	65.621	TRUE	TRUE	4	3	TRUE	59.7296	73.4761	-0.298829	-1.23375
174	1	PARP1_MOUSE	PARP1_MOUSE		26.8	1013	113101	Poly [ADP-ribose] polymerase 1 OS=Mus musculus GN=Parp1 PE=1 SV=3	457	457	1	56	86	67	48	42	70	88	56	86	67	48	42	70	88	56	86	67	48	42	70	88	66.9744	80.0117	56.6173	62.5714	49.6203	68.6657	73.5903	65.4359	TRUE	TRUE	4	3	TRUE	66.5437	63.9588	0.0571604	0.117772
545	1	DDX46_MOUSE	DDX46_MOUSE		33.8	1032	117449	Probable ATP-dependent RNA helicase DDX46 OS=Mus musculus GN=Ddx46 PE=1 SV=2	454	454	1	53	83	73	50	43	74	78	53	83	73	50	43	74	78	53	83	73	50	43	74	78	64.8309	76.8989	65.5714	65.5714	51.7389	72.7443	60.2079	65.3662	TRUE	TRUE	4	3	TRUE	68.2181	61.5637	0.148076	0.395719
583	1	LAP2B_MOUSE	LAP2B_MOUSE		41.4	452	50296	Lamina-associated polypeptide 2, isoforms beta/delta/epsilon/gamma OS=Mus musculus GN=Tmpo PE=1 SV=3	547	321	0.587	85	64	79	93	81	61	84	58	36	47	62	45	33	40	78.338	50.609	63.899	86.025	66.892	47	60.952	88.0116	43.9801	52.8427	96.1667	69.1649	46	44.9953	63.023	TRUE	TRUE	4	3	TRUE	70.2503	53.3867	0.396023	1.34493
623	1	TIF1B_MOUSE	TIF1B_MOUSE		48	834	88848	Transcription intermediary factor 1-beta OS=Mus musculus GN=Trim28 PE=1 SV=3	437	437	1	74	80	75	57	42	50	59	74	80	75	57	42	50	59	74	80	75	57	42	50	59	84.393	74.9387	70.2824	69.5597	50.5714	47	43.9801	62.9608	TRUE	TRUE	4	3	TRUE	74.7935	47.1839	0.664619	2.31759
1141	1	SMC3_MOUSE	SMC3_MOUSE		38.8	1217	141557	Structural maintenance of chromosomes protein 3 OS=Mus musculus GN=Smc3 PE=1 SV=2	429	429	1	52	75	71	60	42	67	62	52	75	71	60	42	67	62	52	75	71	60	42	67	62	64.2857	70.8327	62.5714	72.1143	50.5783	65.5714	47.3001	61.8934	TRUE	TRUE	4	3	TRUE	67.451	54.4833	0.308027	0.976923
223	1	PPIB_MOUSE	PPIB_MOUSE		50.5	216	23714	Peptidyl-prolyl cis-trans isomerase B OS=Mus musculus GN=Ppib PE=2 SV=2	444	444	1	54	51	61	71	81	51	75	54	51	61	71	81	51	75	54	51	61	71	81	51	75	65.5714	44.511	51.9391	78.9424	81.6616	47.625	57.178	61.0612	TRUE	TRUE	4	3	TRUE	60.241	62.1549	-0.0451214	-0.205662
84	1	DHX15_MOUSE	DHX15_MOUSE		34.5	795	91008	Putative pre-mRNA-splicing factor ATP-dependent RNA helicase DHX15 OS=Mus musculus GN=Dhx15 PE=2 SV=2	418	371	0.888	30	73	78	44	34	81	78	29	61	71	39	32	70	69	29.967	72.262	76.988	44	33.882	79.625	76.482	43.6576	69.1649	72.1143	59.1663	40.9047	78.9424	58.3	60.3214	TRUE	TRUE	4	3	TRUE	61.0258	59.3824	0.0393832	0.19722
374	1	RUXF_MOUSE	RUXF_MOUSE		40.7	86	9726	Small nuclear ribonucleoprotein F OS=Mus musculus GN=Snrpf PE=2 SV=1	428	428	1	62	58	60	37	71	80	60	62	58	60	37	71	80	60	62	58	60	37	71	80	60	72.7443	52.576	50.0393	47	72.7443	80.0117	44.6786	59.9706	TRUE	TRUE	4	3	TRUE	55.5899	65.8115	-0.243518	-0.764832
579	1	RBBP4_MOUSE	RBBP4_MOUSE		24.2	425	47656	Histone-binding protein RBBP4 OS=Mus musculus GN=Rbbp4 PE=1 SV=4	573	107	0.187	71	64	84	73	102	91	88	12	10	22	12	12	19	20	53.647	40	64.625	68.308	89.143	63.129	53.171	65.4517	33.5016	54.4506	77.4976	89.0204	61.447	38.1673	59.9337	TRUE	FALSE	4	3	TRUE	57.7254	62.8782	-0.123356	-0.337385
638	1	SF01_MOUSE	SF01_MOUSE		22.1	653	70409	Splicing factor 1 OS=Mus musculus GN=Sf1 PE=1 SV=5	419	419	1	44	67	70	38	54	61	85	44	67	70	38	54	61	85	44	67	70	38	54	61	85	58.7143	62.5714	61.2857	48.8401	58.7143	57.5714	67.4711	59.3098	TRUE	TRUE	4	3	TRUE	57.8529	61.2523	-0.0823746	-0.100421
818	1	SRRM2_MOUSE	SRRM2_MOUSE		19.6	2703	294676	Serine/arginine repetitive matrix protein 2 OS=Mus musculus GN=Srrm2 PE=1 SV=2	416	416	1	49	65	58	43	57	60	84	49	65	58	43	57	60	84	49	65	58	43	57	60	84	61.2857	61.2857	48.5187	58.3	61.447	56.8067	65.4517	59.0137	TRUE	TRUE	4	3	TRUE	57.3475	61.2351	-0.0946284	-0.161429
218	1	CBX3_MOUSE	CBX3_MOUSE		42.6	183	20856	Chromobox protein homolog 3 OS=Mus musculus GN=Cbx3 PE=1 SV=2	470	310	0.66	65	62	64	75	81	47	76	61	30	41	52	51	34	41	64.297	52.909	54.463	67.532	71.132	43.208	63.127	74.9387	45.6234	43.4031	76.8989	73.5903	41.5314	48.8401	57.8323	TRUE	TRUE	4	3	TRUE	60.216	54.654	0.139822	0.652066
493	1	SSRP1_MOUSE	SSRP1_MOUSE		30.8	708	80861	FACT complex subunit SSRP1 OS=Mus musculus GN=Ssrp1 PE=1 SV=2	405	405	1	34	72	63	33	54	69	80	34	72	63	33	54	69	80	34	72	63	33	54	69	80	50.5783	68.6657	52.576	44.2536	58.3	66.9744	61.2857	57.5191	TRUE	TRUE	4	3	TRUE	54.0184	62.1867	-0.203156	-0.439638
389	1	RAN_MOUSE	RAN_MOUSE		27.8	216	24424	GTP-binding nuclear protein Ran OS=Mus musculus GN=Ran PE=1 SV=3	402	402	1	63	53	57	57	61	54	57	63	53	57	57	61	54	57	63	53	57	57	61	54	57	74.4286	45.7143	45.7143	69.1649	65.4517	50.5783	41.5314	56.0833	TRUE	TRUE	4	3	TRUE	58.7555	52.5205	0.161844	0.87269
1116	1	DECR_MOUSE	DECR_MOUSE		44.2	335	36215	2,4-dienoyl-CoA reductase, mitochondrial OS=Mus musculus GN=Decr1 PE=1 SV=1	381	381	1	30	57	65	44	78	43	64	30	57	65	44	78	43	64	30	57	65	44	78	43	64	44.6786	51.7389	55.4286	60.2294	78.9424	41	49.6203	54.5197	TRUE	TRUE	4	3	TRUE	53.0189	56.5209	-0.092279	0.0759453
403	1	TRA2B_MOUSE	TRA2B_MOUSE		29.2	288	33667	Transformer-2 protein homolog beta OS=Mus musculus GN=Tra2b PE=1 SV=1	407	389	0.956	19	59	52	56	122	29	70	17	54	49	54	119	28	68	18.214	57.333	51.042	55.612	121.568	28.5	69.172	27.5947	51.9391	41.1053	67.9446	110.224	24.8297	51.7389	53.6252	TRUE	TRUE	4	3	TRUE	47.1459	62.2642	-0.401269	-1.23642
1341	1	SF13A_MOUSE	SF13A_MOUSE		26	262	31302	Splicing factor, arginine/serine-rich 13A OS=Mus musculus GN=Sfrs13a PE=1 SV=2	381	381	1	19	55	55	32	70	46	104	19	55	55	32	70	46	104	19	55	55	32	70	46	104	28.8516	48.2857	44.511	43.6576	72.1143	44.9953	89.0204	53.0623	TRUE	TRUE	4	3	TRUE	41.3265	68.71	-0.733454	-2.51671
564	1	A1CF_MOUSE	A1CF_MOUSE		44.4	595	65726	APOBEC1 complementation factor OS=Mus musculus GN=A1cf PE=2 SV=1	364	364	1	23	70	77	29	38	46	81	23	70	77	29	38	46	81	23	70	77	29	38	46	81	34.4059	65.5714	72.7443	40.9047	46.5	44.511	62.9924	52.5185	TRUE	TRUE	4	3	TRUE	53.4066	51.3345	0.0570892	0.863461
229	1	UBF1_MOUSE	UBF1_MOUSE		24.3	765	89510	Nucleolar transcription factor 1 OS=Mus musculus GN=Ubtf PE=1 SV=1	362	362	1	17	71	73	19	21	66	95	17	71	73	19	21	66	95	17	71	73	19	21	66	95	25.5714	67.4711	65.4517	30.4649	28.8516	63.5714	83.1039	52.0694	TRUE	TRUE	4	3	TRUE	47.2398	58.509	-0.308655	-0.739866
900	1	ZBT20_MOUSE	ZBT20_MOUSE		49.8	741	81035	Zinc finger and BTB domain-containing protein 20 OS=Mus musculus GN=Zbtb20 PE=1 SV=1	355	355	1	33	46	71	15	49	69	72	33	46	71	15	49	69	72	33	46	71	15	49	69	72	50.0393	40.3011	62.1429	25.4286	55.4286	67.9446	55.4286	50.9591	TRUE	TRUE	4	3	TRUE	44.478	59.6006	-0.422235	-1.18488
1361	1	BUB3_MOUSE	BUB3_MOUSE		39.3	326	36986	Mitotic checkpoint protein BUB3 OS=Mus musculus GN=Bub3 PE=2 SV=1	344	344	1	40	45	43	47	41	40	88	40	45	43	47	41	40	88	40	45	43	47	41	40	88	55.4286	38.9296	35.9489	62.1429	49.1114	38.1673	75.3866	50.7307	TRUE	TRUE	4	3	TRUE	48.1125	54.2218	-0.172461	-0.289121
904	1	NAT10_MOUSE	NAT10_MOUSE		32.1	1024	115420	N-acetyltransferase 10 OS=Mus musculus GN=Nat10 PE=2 SV=1	350	350	1	20	62	70	20	25	73	80	20	62	70	20	25	73	80	20	62	70	20	25	73	80	30.4649	56.8067	61.447	32.7143	33.5016	71.2957	62.1429	49.7676	TRUE	TRUE	4	3	TRUE	45.3582	55.6467	-0.294933	-0.751147
1074	1	NXF1_MOUSE	NXF1_MOUSE		43.7	618	70302	Nuclear RNA export factor 1 OS=Mus musculus GN=Nxf1 PE=1 SV=2	347	347	1	24	69	72	21	27	53	81	24	69	72	21	27	53	81	24	69	72	21	27	53	81	35.9489	64.2857	64.8309	34.4059	34.7143	49.6203	63.9553	49.6802	TRUE	TRUE	4	3	TRUE	49.8678	49.43	0.0127237	0.093148
891	1	ELYS_MOUSE	ELYS_MOUSE		28.5	2243	247647	Protein ELYS OS=Mus musculus GN=Ahctf1 PE=1 SV=1	344	344	1	37	70	51	23	33	55	75	37	70	51	23	33	55	75	37	70	51	23	33	55	75	52.8427	66.1556	41	35.6831	40.1184	52.8427	57.5714	49.4591	TRUE	TRUE	4	3	TRUE	48.9204	50.1775	-0.0366063	-0.0507476
608	1	PCBP2_MOUSE	PCBP2_MOUSE		43.4	362	38223	Poly(rC)-binding protein 2 OS=Mus musculus GN=Pcbp2 PE=1 SV=1	461	260	0.564	75	56	63	71	84	61	51	44	32	34	41	48	34	27	57.918	40.828	47.507	52.942	63.429	45.769	36.391	69.5597	34.6897	38.9296	66.9744	67.4711	44.2536	24.3351	49.459	TRUE	TRUE	4	3	TRUE	52.5384	45.3533	0.212164	0.641172
1349	1	RUVB2_MOUSE	RUVB2_MOUSE		44.3	463	51114	RuvB-like 2 OS=Mus musculus GN=Ruvbl2 PE=2 SV=3	342	342	1	31	62	64	31	43	50	61	31	62	64	31	43	50	61	31	62	64	31	43	50	61	46	58.3	53.578	42.4356	52.2963	47.3001	46.2204	49.4472	TRUE	TRUE	4	3	TRUE	50.0784	48.6056	0.0430652	0.187472
377	1	SMD1_MOUSE	SMD1_MOUSE		27.7	119	13283	Small nuclear ribonucleoprotein Sm D1 OS=Mus musculus GN=Snrpd1 PE=2 SV=1	353	353	1	22	70	50	20	85	19	87	22	70	50	20	85	19	87	22	70	50	20	85	19	87	32.4506	65.4517	40.5306	31.8263	85.0309	16.4286	72.7443	49.209	TRUE	TRUE	4	3	TRUE	42.5648	58.0679	-0.448081	-1.21902
1216	1	RL4_MOUSE	RL4_MOUSE		37.9	419	47155	60S ribosomal protein L4 OS=Mus musculus GN=Rpl4 PE=1 SV=3	339	339	1	23	58	57	43	37	52	69	23	58	57	43	37	52	69	23	58	57	43	37	52	69	34.7143	53.578	47	58.7143	45.7143	48.5187	51.5499	48.5413	TRUE	TRUE	4	3	TRUE	48.5016	48.5943	-0.00275306	-0.0541885
375	1	RUXG_MOUSE	RUXG_MOUSE		25	76	8497	Small nuclear ribonucleoprotein G OS=Mus musculus GN=Snrpg PE=1 SV=1	348	348	1	56	33	42	83	69	32	33	56	33	42	83	69	32	33	56	33	42	83	69	32	33	67.4711	28	34.6897	90.529	70.2824	27.5947	21.1989	48.538	TRUE	TRUE	4	3	TRUE	55.1725	39.692	0.4751	1.34498
94	1	PININ_MOUSE	PININ_MOUSE		35.7	725	82437	Pinin OS=Mus musculus GN=Pnn PE=1 SV=4	340	340	1	34	56	61	42	29	59	59	34	56	61	42	29	59	59	34	56	61	42	29	59	59	50.5714	48.8401	51.5499	52.8427	35.9489	55.4286	43.6576	48.4056	TRUE	TRUE	4	3	TRUE	50.951	45.0117	0.178812	0.435345
341	1	RUVB1_MOUSE	RUVB1_MOUSE		53.1	456	50215	RuvB-like 1 OS=Mus musculus GN=Ruvbl1 PE=1 SV=1	335	335	1	51	36	41	49	56	41	61	51	36	41	49	56	41	61	51	36	41	49	56	41	61	63.9553	30.0067	33.3661	63.5714	60.2079	38.9296	45.6234	47.9515	TRUE	TRUE	4	3	TRUE	47.7249	48.2536	-0.0158952	-0.171905
1379	1	MECP2_MOUSE	MECP2_MOUSE		45.7	484	52308	Methyl-CpG-binding protein 2 OS=Mus musculus GN=Mecp2 PE=1 SV=1	324	324	1	40	53	67	44	31	42	47	40	53	67	44	31	42	47	40	53	67	44	31	42	47	55.8031	47	56.8067	60.8936	38.9296	40.1184	32.7143	47.4665	TRUE	TRUE	4	3	TRUE	55.1259	37.2541	0.56533	1.60002
323	1	CYB5_MOUSE	CYB5_MOUSE		41	134	15242	Cytochrome b5 OS=Mus musculus GN=Cyb5a PE=1 SV=2	335	335	1	80	46	46	60	34	27	42	80	46	46	60	34	27	42	80	46	46	60	34	27	42	90.529	39.5117	37.7143	71.2957	41	23.2053	28.6173	47.4105	TRUE	TRUE	4	3	TRUE	59.7627	30.9409	0.949732	2.78641
208	1	GRP78_MOUSE	GRP78_MOUSE		34.4	655	72423	78 kDa glucose-regulated protein OS=Mus musculus GN=Hspa5 PE=1 SV=3	739	290	0.392	114	70	92	136	152	76	99	32	33	48	36	53	38	50	37.189	36.892	54.784	42.679	61.689	42.308	56.358	53.578	30.8417	43.9801	55.8031	66.1556	40.3011	40.9047	47.3663	TRUE	TRUE	4	3	TRUE	46.0508	49.1205	-0.0930999	-0.415627
591	1	HCFC1_MOUSE	HCFC1_MOUSE		27	2045	210538	Host cell factor 1 OS=Mus musculus GN=Hcfc1 PE=1 SV=1	331	331	1	21	54	77	20	30	55	74	21	54	77	20	30	55	74	21	54	77	20	30	55	74	31.6137	47.625	72.9667	32.4071	37.7143	51.9391	56.6173	47.269	TRUE	TRUE	4	3	TRUE	46.1531	48.7569	-0.0791776	-0.285023
722	1	HNRPQ_MOUSE	HNRPQ_MOUSE		41.4	623	69634	Heterogeneous nuclear ribonucleoprotein Q OS=Mus musculus GN=Syncrip PE=1 SV=2	324	324	1	28	54	60	29	24	44	85	28	54	60	29	24	44	85	28	54	60	29	24	44	85	42.6954	47.8571	50.5714	41.1053	32.4506	42.12	67.9446	46.3921	TRUE	TRUE	4	3	TRUE	45.5573	47.505	-0.0603979	-0.267846
1094	1	CSTF3_MOUSE	CSTF3_MOUSE		31	717	82878	Cleavage stimulation factor subunit 3 OS=Mus musculus GN=Cstf3 PE=1 SV=1	325	325	1	46	51	52	40	39	44	53	46	51	52	40	39	44	53	46	51	52	40	39	44	53	59.1663	44.6786	42.12	50.5714	47.3001	42.4356	37.851	46.3033	TRUE	TRUE	4	3	TRUE	49.1341	42.5289	0.20828	0.456774
1051	1	NOP2_MOUSE	NOP2_MOUSE		31.7	793	86753	Putative ribosomal RNA methyltransferase NOP2 OS=Mus musculus GN=Nop2 PE=2 SV=1	318	318	1	27	44	48	27	59	63	50	27	44	48	27	59	63	50	27	44	48	27	59	63	50	41	37.7143	39.3707	39.3707	63.5714	61.2857	34.7143	45.2896	TRUE	TRUE	4	3	TRUE	39.3639	53.1905	-0.434294	-1.34251
110	1	PGRC1_MOUSE	PGRC1_MOUSE		56.9	195	21695	Membrane-associated progesterone receptor component 1 OS=Mus musculus GN=Pgrmc1 PE=1 SV=4	318	289	0.909	57	35	37	42	47	55	45	52	30	31	39	44	51	42	56.906	33.947	36.314	42	47	54.849	44.681	68.6657	28.8516	29.1877	53.578	54.4506	51.5499	30.65	45.2762	TRUE	TRUE	4	3	TRUE	45.0708	45.5501	-0.0152641	-0.162785
784	1	ROD1_MOUSE	ROD1_MOUSE		42.1	523	56702	Regulator of differentiation 1 OS=Mus musculus GN=Rod1 PE=2 SV=1	425	298	0.701	48	82	69	45	48	47	86	26	71	54	14	24	38	71	27.939	73.977	57.375	15.863	25.714	40.206	74.647	41.7881	70.2824	47.625	26.2881	33.9439	38.6009	56.8067	45.0479	TRUE	TRUE	4	3	TRUE	46.4959	43.1171	0.108843	0.201032
1259	1	CPSF1_MOUSE	CPSF1_MOUSE		21.7	1441	160819	Cleavage and polyadenylation specificity factor subunit 1 OS=Mus musculus GN=Cpsf1 PE=1 SV=1	318	318	1	24	56	59	19	28	62	70	24	56	59	19	28	62	70	24	56	59	19	28	62	70	36.8536	49.6203	48.8401	30.8417	35.5753	60.2294	52.8427	44.9719	TRUE	TRUE	4	3	TRUE	41.5389	49.5491	-0.254396	-0.644086
584	1	LAP2A_MOUSE	LAP2A_MOUSE		40.1	693	75333	Lamina-associated polypeptide 2, isoforms alpha/zeta OS=Mus musculus GN=Tmpo PE=1 SV=3	444	218	0.491	46	61	74	49	65	61	88	19	33	42	18	29	33	44	25.662	46.391	57.101	24.975	43.108	47	67.048	38.8089	41	47.3001	36.8536	52.576	46.2204	50.5783	44.7625	TRUE	TRUE	4	3	TRUE	40.9906	49.7916	-0.280607	-0.714495
617	1	SF3A2_MOUSE	SF3A2_MOUSE		26.7	475	49912	Splicing factor 3A subunit 2 OS=Mus musculus GN=Sf3a2 PE=2 SV=2	315	315	1	33	50	49	37	34	35	77	33	50	49	37	34	35	77	33	50	49	37	34	35	77	49.6203	43.4031	40.1184	47.3001	41.5314	31.6137	59.1663	44.6791	TRUE	TRUE	4	3	TRUE	45.1105	44.1038	0.03256	0.147445
330	1	FUS_MOUSE	FUS_MOUSE		14.7	518	52674	RNA-binding protein FUS OS=Mus musculus GN=Fus PE=2 SV=1	306	306	1	32	46	42	35	38	55	58	32	46	42	35	38	55	58	32	46	42	35	38	55	58	47	39.7726	34.4059	46	46	51.7389	42.6954	43.9447	TRUE	TRUE	4	3	TRUE	41.7946	46.8114	-0.163544	-0.299979
277	1	RAGP1_MOUSE	RAGP1_MOUSE		46.3	589	63617	Ran GTPase-activating protein 1 OS=Mus musculus GN=Rangap1 PE=1 SV=1	305	305	1	26	48	40	23	42	63	63	26	48	40	23	42	63	63	26	48	40	23	42	63	63	38.9296	42.12	31.8263	35.5753	50.0393	60.8936	47.625	43.8584	TRUE	TRUE	4	3	TRUE	37.1128	52.8526	-0.510059	-1.49178
982	1	DDX39_MOUSE	DDX39_MOUSE		32.1	427	49068	ATP-dependent RNA helicase DDX39 OS=Mus musculus GN=Ddx39 PE=2 SV=1	921	158	0.172	152	113	143	155	123	96	139	12	32	32	22	16	20	24	32.488	55.143	64.889	41.905	26.7	37.273	47.193	48.5187	48.5187	54.8413	52.2963	34.4059	34.248	32.835	43.6663	TRUE	FALSE	4	3	TRUE	51.0438	33.8296	0.593447	2.25819
1150	1	RBM8A_MOUSE	RBM8A_MOUSE		42	174	19889	RNA-binding protein 8A OS=Mus musculus GN=Rbm8a PE=1 SV=3	300	300	1	36	53	47	30	39	43	52	36	53	47	30	39	43	52	36	53	47	30	39	43	52	52.2963	46.5	38.8089	41.7881	47.625	41.1053	37.3121	43.6337	TRUE	TRUE	4	3	TRUE	44.8483	42.0141	0.0941789	0.53169
665	1	SR140_MOUSE	SR140_MOUSE		23.6	1029	118247	U2-associated protein SR140 OS=Mus musculus GN=Sr140 PE=1 SV=2	310	310	1	14	57	72	11	15	55	86	14	57	72	11	15	55	86	14	57	72	11	15	55	86	21.9796	50.5783	63.9553	20.3771	22.5714	52.576	69.5597	43.0853	TRUE	TRUE	4	3	TRUE	39.2226	48.2357	-0.298418	-0.761564
1378	1	BAZ1B_MOUSE	BAZ1B_MOUSE		25.7	1479	170652	Tyrosine-protein kinase BAZ1B OS=Mus musculus GN=Baz1b PE=1 SV=2	308	308	1	15	80	56	13	16	61	67	15	80	56	13	16	61	67	15	80	56	13	16	61	67	24.1724	75.3866	44.9953	22.874	24	59.1663	50.5714	43.0237	TRUE	TRUE	4	3	TRUE	41.8571	44.5792	-0.0909006	-0.191054
476	1	TERA_MOUSE	TERA_MOUSE		49.4	806	89323	Transitional endoplasmic reticulum ATPase OS=Mus musculus GN=Vcp PE=1 SV=4	302	302	1	43	56	52	30	21	36	64	43	56	52	30	21	36	64	43	56	52	30	21	36	64	57.5714	49.1114	41.5314	41.5314	29.5617	32.4506	49.1114	42.9813	TRUE	TRUE	4	3	TRUE	47.4364	37.0412	0.356863	1.25548
452	1	H32_MOUSE	H32_MOUSE		44.1	136	15389	Histone H3.2 OS=Mus musculus GN=Hist1h3b PE=1 SV=2	1312	60	0.046	222	181	126	225	223	219	116	0	14	10	0	0	23	13	0	87.063	62.727	0	0	111.392	50.194	0	81.6616	52.2963	0.285714	0	129.135	35.6831	42.723	TRUE	FALSE	4	3	TRUE	33.5609	54.9392	-0.711056	-2.22099
1342	1	MTA2_MOUSE	MTA2_MOUSE		44	668	75031	Metastasis-associated protein MTA2 OS=Mus musculus GN=Mta2 PE=1 SV=1	296	271	0.916	24	39	78	17	37	43	58	22	33	71	16	35	39	55	23.375	37.5	77.539	16.889	36.75	42.714	57.578	34.9513	31.8263	75.3866	27.9841	44.6786	40.5306	41.7881	42.4494	TRUE	TRUE	4	3	TRUE	42.5371	42.3324	0.00695745	-0.167033
339	1	PM14_MOUSE	PM14_MOUSE		45.6	125	14586	Pre-mRNA branch site protein p14 OS=Mus musculus GN=Sf3b14 PE=2 SV=1	286	286	1	31	49	40	43	35	47	41	31	49	40	43	35	47	41	31	49	40	43	35	47	41	45.6234	42.4356	32.1429	57.178	43.4031	45.7143	27.9841	42.0688	TRUE	TRUE	4	3	TRUE	44.345	39.0339	0.184044	0.067504
1368	1	NU160_MOUSE	NU160_MOUSE		25.8	1402	158233	Nuclear pore complex protein Nup160 OS=Mus musculus GN=Nup160 PE=1 SV=2	296	296	1	19	49	69	16	13	44	86	19	49	69	16	13	44	86	19	49	69	16	13	44	86	29.1877	42.6954	58.7143	27.5947	20.4286	42.6954	70.8327	41.7356	TRUE	TRUE	4	3	TRUE	39.548	44.6522	-0.175126	-0.546622
1214	1	U2AF1_MOUSE	U2AF1_MOUSE		34.3	239	27816	Splicing factor U2AF 35 kDa subunit OS=Mus musculus GN=U2af1 PE=2 SV=4	297	297	1	14	58	65	23	18	38	81	14	58	65	23	18	38	81	14	58	65	23	18	38	81	22.6866	52.8427	55.8031	35.9489	25.5714	34.7143	64.2857	41.6932	TRUE	TRUE	4	3	TRUE	41.8203	41.5238	0.0102653	-0.272838
535	1	NCBP1_MOUSE	NCBP1_MOUSE		29	790	91928	Nuclear cap-binding protein subunit 1 OS=Mus musculus GN=Ncbp1 PE=1 SV=2	286	286	1	27	43	57	21	30	45	63	27	43	57	21	30	45	63	27	43	57	21	30	45	63	40.9047	36.8536	46	33.5016	37.3121	43.4031	48.2857	40.8944	TRUE	TRUE	4	3	TRUE	39.315	43.0003	-0.129269	-0.469272
85	1	SFRS5_MOUSE	SFRS5_MOUSE		25.2	270	30946	Splicing factor, arginine/serine-rich 5 OS=Mus musculus GN=Sfrs5 PE=1 SV=1	328	232	0.707	47	40	42	54	55	39	51	34	32	32	31	36	32	35	41.246	36.339	36.923	41.485	46.857	36.392	43.615	57.178	30.65	29.3074	51.9391	53.578	33.229	30.0067	40.8412	TRUE	TRUE	4	3	TRUE	42.2686	38.9379	0.118413	-0.0153434
594	1	ZN638_MOUSE	ZN638_MOUSE		21	1960	218135	Zinc finger protein 638 OS=Mus musculus GN=Znf638 PE=1 SV=2	292	292	1	17	62	68	11	22	57	55	17	62	68	11	22	57	55	17	62	68	11	22	57	55	26.2881	55.8031	57.178	20.1939	30.4649	54.4506	38.8089	40.4553	TRUE	TRUE	4	3	TRUE	39.8658	41.2414	-0.0489432	-0.303747
449	1	ERH_MOUSE	ERH_MOUSE		33.7	104	12260	Enhancer of rudimentary homolog OS=Mus musculus GN=Erh PE=1 SV=1	273	273	1	50	36	39	43	38	36	31	50	36	39	43	38	36	31	50	36	39	43	38	36	31	63.5714	30.0857	31.4	57.5714	46.2204	32.4071	19.5654	40.1174	TRUE	TRUE	4	3	TRUE	45.6571	32.731	0.480183	0.554337
161	1	RPB1_MOUSE	RPB1_MOUSE		29.8	1970	217177	DNA-directed RNA polymerase II subunit RPB1 OS=Mus musculus GN=Polr2a PE=1 SV=3	284	284	1	27	54	61	16	30	38	58	27	54	61	16	30	38	58	27	54	61	16	30	38	58	40.3011	47.3001	51.7389	26.5714	37.1497	34.6897	42.4356	40.0267	TRUE	TRUE	4	3	TRUE	41.4779	38.0917	0.122867	-0.0898151
1137	1	SNW1_MOUSE	SNW1_MOUSE		41.2	536	61476	SNW domain-containing protein 1 OS=Mus musculus GN=Snw1 PE=1 SV=3	280	280	1	24	64	57	19	27	27	62	24	64	57	19	27	27	62	24	64	57	19	27	27	62	36.627	60.2079	46.5	30.65	34.9513	23.7143	47	39.9501	TRUE	TRUE	4	3	TRUE	43.4962	35.2219	0.304419	0.268504
633	1	UD11_MOUSE	UD11_MOUSE		27.7	535	60124	UDP-glucuronosyltransferase 1-1 OS=Mus musculus GN=Ugt1a1 PE=2 SV=1	446	198	0.444	75	84	74	77	24	45	67	54	37	25	54	3	11	14	68.175	57.442	34.701	71.25	4.864	16.394	20.276	77.4976	52.2963	28.221	80.5804	8.36629	13.7659	12.8966	39.0891	TRUE	TRUE	4	3	TRUE	59.6488	11.6762	2.35292	3.6716
611	1	SFRS2_MOUSE	SFRS2_MOUSE		18.1	221	25477	Splicing factor, arginine/serine-rich 2 OS=Mus musculus GN=Sfrs2 PE=1 SV=4	266	266	1	41	26	30	65	34	32	38	41	26	30	65	34	32	38	41	26	30	65	34	32	38	56.8067	20.5397	24.3661	74.9387	41.1053	27.9841	25.4286	38.7385	TRUE	TRUE	4	3	TRUE	44.1628	31.506	0.487206	0.51919
526	1	SMU1_MOUSE	SMU1_MOUSE		29.4	513	57545	WD40 repeat-containing protein SMU1 OS=Mus musculus GN=Smu1 PE=2 SV=2	263	263	1	36	40	45	28	40	35	39	36	40	45	28	40	35	39	36	40	45	28	40	35	39	51.7389	33.3661	37.3121	39.7726	47.8571	31.4	26.7143	38.3087	TRUE	TRUE	4	3	TRUE	40.5474	35.3238	0.198969	0.0478658
1134	1	NHP2_MOUSE	NHP2_MOUSE		49	153	17248	H/ACA ribonucleoprotein complex subunit 2 OS=Mus musculus GN=Nhp2 PE=2 SV=1	250	250	1	49	19	25	49	64	20	24	49	19	25	49	64	20	24	49	19	25	49	64	20	24	62.5714	15	20.9611	64.2857	67.9446	18	15.2857	37.7212	TRUE	TRUE	4	3	TRUE	40.7046	33.7434	0.270584	0.12533
664	1	RRP5_MOUSE	RRP5_MOUSE		29.9	1862	207780	Protein RRP5 homolog OS=Mus musculus GN=Pdcd11 PE=2 SV=2	276	276	1	15	38	57	5	34	55	72	15	38	57	5	34	55	72	15	38	57	5	34	55	72	23.5407	32.1429	46.2204	12.2857	41.7881	52.2963	54.8413	37.5879	TRUE	TRUE	4	3	TRUE	28.5474	49.6419	-0.798198	-1.69023
1285	1	NUP50_MOUSE	NUP50_MOUSE		51.7	466	49496	Nuclear pore complex protein Nup50 OS=Mus musculus GN=Nup50 PE=1 SV=1	255	255	1	31	35	41	26	47	37	38	31	35	41	26	47	37	38	31	35	41	26	47	37	38	45.7143	29.7336	33.9439	38.1673	54.8413	33.9439	26.0924	37.4909	TRUE	TRUE	4	3	TRUE	36.8897	38.2925	-0.0538427	-0.206293
597	1	RAD21_MOUSE	RAD21_MOUSE		42.2	635	72024	Double-strand-break repair protein rad21 homolog OS=Mus musculus GN=Rad21 PE=1 SV=2	263	263	1	26	53	52	21	17	44	50	26	53	52	21	17	44	50	26	53	52	21	17	44	50	39.5117	46	41.7881	33.5973	24.4816	41.7881	34.6897	37.4081	TRUE	TRUE	4	3	TRUE	40.2243	33.6531	0.257326	0.16609
541	1	PDS5B_MOUSE	PDS5B_MOUSE		30.8	1446	164420	Sister chromatid cohesion protein PDS5 homolog B OS=Mus musculus GN=Pds5b PE=1 SV=1	276	245	0.888	17	53	61	16	21	44	64	17	49	55	14	19	37	54	17	52.015	59.342	15.647	20.357	41.981	61.5	26.1973	44.9953	49.6203	26.0924	28.4494	39.3707	46.5	37.3179	TRUE	TRUE	4	3	TRUE	36.7263	38.1067	-0.0532308	-0.237865
988	1	SFRS4_MOUSE	SFRS4_MOUSE		24.7	489	55980	Splicing factor, arginine/serine-rich 4 OS=Mus musculus GN=Sfrs4 PE=2 SV=1	296	200	0.676	40	35	43	60	46	26	46	27	27	33	37	27	19	30	32.754	30.661	38.077	49.515	35.143	21.608	37.385	48.8401	24.9006	31.267	65.4517	43.6576	19.2119	25.1806	36.9299	TRUE	TRUE	4	3	TRUE	42.6149	29.35	0.537996	0.564822
257	1	CALX_MOUSE	CALX_MOUSE		33.8	591	67279	Calnexin OS=Mus musculus GN=Canx PE=1 SV=1	269	269	1	4	47	53	24	17	64	60	4	47	53	24	17	64	60	4	47	53	24	17	64	60	7.19043	41.5314	42.4356	36.378	24.1724	62.1429	44.511	36.9088	TRUE	TRUE	4	3	TRUE	31.8839	43.6088	-0.451792	-0.675821
1104	1	AAAD_MOUSE	AAAD_MOUSE		35.7	398	45251	Arylacetamide deacetylase OS=Mus musculus GN=Aadac PE=1 SV=3	257	257	1	27	46	54	27	20	28	55	27	46	54	27	20	28	55	27	46	54	27	20	28	55	41.1053	40.5306	43.0377	39.5117	28	24.5714	39.3707	36.5896	TRUE	TRUE	4	3	TRUE	41.0463	30.6474	0.421489	0.463381
58	1	THOC2_MOUSE	THOC2_MOUSE		16.5	1594	182774	THO complex subunit 2 OS=Mus musculus GN=Thoc2 PE=3 SV=1	260	260	1	13	50	45	18	14	48	72	13	50	45	18	14	48	72	13	50	45	18	14	48	72	20.3771	43.0377	36.8536	29.1877	20.6974	46.5	54.4506	35.872	TRUE	TRUE	4	3	TRUE	32.364	40.5493	-0.325287	-0.438515
297	1	HNF4A_MOUSE	HNF4A_MOUSE		28.3	474	52685	Hepatocyte nuclear factor 4-alpha OS=Mus musculus GN=Hnf4a PE=1 SV=2	250	250	1	24	44	41	27	19	47	48	24	44	41	27	19	47	48	24	44	41	27	19	47	48	35.6831	37.3121	33.229	38.6009	26.0924	45.6234	33.229	35.6814	TRUE	TRUE	4	3	TRUE	36.2063	34.9816	0.0496431	0.161974
181	1	RL7A_MOUSE	RL7A_MOUSE		31.2	266	29978	60S ribosomal protein L7a OS=Mus musculus GN=Rpl7a PE=2 SV=2	247	247	1	30	40	36	41	35	33	32	30	40	36	41	35	33	32	30	40	36	41	35	33	32	43.9801	33.229	28.6173	51.5499	43.0377	28.7143	19.8713	35.5714	TRUE	TRUE	4	3	TRUE	39.3441	30.5411	0.365394	0.716792
1224	1	PRP4_MOUSE	PRP4_MOUSE		38	521	58371	U4/U6 small nuclear ribonucleoprotein Prp4 OS=Mus musculus GN=Prpf4 PE=2 SV=1	242	242	1	28	30	40	38	41	26	39	28	30	40	38	41	26	39	28	30	40	38	41	26	39	43.0377	24.5714	32.4506	49.1114	48.8401	22.6866	26.8571	35.365	TRUE	TRUE	4	3	TRUE	37.2928	32.7946	0.185437	0.464163
855	1	MYEF2_MOUSE	MYEF2_MOUSE		37.9	591	63296	Myelin expression factor 2 OS=Mus musculus GN=Myef2 PE=1 SV=1	260	260	1	3	29	28	1	43	71	85	3	29	28	1	43	71	85	3	29	28	1	43	71	85	6.16471	24	22.4286	4.33043	51.9391	69.5597	68.6657	35.2983	TRUE	TRUE	4	3	TRUE	14.2309	63.3882	-2.15518	-3.5555
1271	1	XPO2_MOUSE	XPO2_MOUSE		32	971	110456	Exportin-2 OS=Mus musculus GN=Cse1l PE=2 SV=1	251	251	1	19	45	60	32	19	31	45	19	45	60	32	19	31	45	19	45	60	32	19	31	45	28.7143	38.8089	50.5783	43.4031	26.8571	27.1429	31.4	35.2721	TRUE	TRUE	4	3	TRUE	40.3761	28.4667	0.50423	0.944355
782	1	NU107_MOUSE	NU107_MOUSE		32.5	926	106718	Nuclear pore complex protein Nup107 OS=Mus musculus GN=Nup107 PE=2 SV=1	256	256	1	10	47	56	32	15	40	56	10	47	56	32	15	40	56	10	47	56	32	15	40	56	16.4286	41.7881	44.6786	43.0377	22.7909	37.851	40.3011	35.268	TRUE	TRUE	4	3	TRUE	36.4832	33.6477	0.116728	0.333885
679	1	XPO1_MOUSE	XPO1_MOUSE		39.3	1071	123094	Exportin-1 OS=Mus musculus GN=Xpo1 PE=1 SV=1	263	263	1	4	57	55	9	11	46	81	4	57	55	9	11	46	81	4	57	55	9	11	46	81	7.47957	51.5499	44.2536	18	16.4286	44.6786	63.5714	35.1374	TRUE	TRUE	4	3	TRUE	30.3207	41.5595	-0.454874	-0.633667
930	1	NU133_MOUSE	NU133_MOUSE		40.2	1155	128688	Nuclear pore complex protein Nup133 OS=Mus musculus GN=Nup133 PE=1 SV=1	245	245	1	22	53	43	14	19	42	52	22	53	43	14	19	42	52	22	53	43	14	19	42	52	33.229	46.2204	35.6831	24.3661	26.5714	39.5117	37.1497	34.6759	TRUE	TRUE	4	3	TRUE	34.8747	34.411	0.0193121	0.200655
1127	1	NOP10_MOUSE	NOP10_MOUSE		57.8	64	7707	H/ACA ribonucleoprotein complex subunit 3 OS=Mus musculus GN=Nop10 PE=2 SV=1	240	240	1	23	31	30	25	44	32	55	23	31	30	25	44	32	55	23	31	30	25	44	32	55	34.7143	25.5714	24.5714	37.1497	52.8427	28.221	39.5117	34.6546	TRUE	TRUE	4	3	TRUE	30.5017	40.1918	-0.398011	-0.568733
495	1	ZCH18_MOUSE	ZCH18_MOUSE		28.8	948	105695	Zinc finger CCCH domain-containing protein 18 OS=Mus musculus GN=Zc3h18 PE=1 SV=1	236	236	1	30	36	32	24	41	34	39	30	36	32	24	41	34	39	30	36	32	24	41	34	39	44.2536	30.2827	26.0924	36.627	48.2857	30.0857	26.5714	34.5998	TRUE	TRUE	4	3	TRUE	34.3139	34.981	-0.0277753	0.131569
642	1	CP3AB_MOUSE	CP3AB_MOUSE		35.9	504	57856	Cytochrome P450 3A11 OS=Mus musculus GN=Cyp3a11 PE=1 SV=1	249	113	0.454	26	52	72	16	18	28	37	16	21	29	8	9	12	18	24.81	46.75	72	14.8	18	28	37	37.3121	41.1053	63.5714	24.8297	25.5714	24.5714	24.5714	34.5047	TRUE	TRUE	4	3	TRUE	41.7046	24.9048	0.743786	1.27542
915	1	DDX18_MOUSE	DDX18_MOUSE		43.3	660	74182	ATP-dependent RNA helicase DDX18 OS=Mus musculus GN=Ddx18 PE=2 SV=1	238	238	1	32	31	36	12	49	34	44	32	31	36	12	49	34	44	32	31	36	12	49	34	44	47.3001	25.4071	28.8516	22	55.8031	30.2827	30.4649	34.3014	TRUE	TRUE	4	3	TRUE	30.8897	38.8502	-0.330797	-0.450754
453	1	H33_MOUSE	H33_MOUSE		43.4	136	15329	Histone H3.3 OS=Mus musculus GN=H3f3a PE=1 SV=2	1302	50	0.038	222	181	125	225	223	213	113	0	14	9	0	0	17	10	0	87.063	56.455	0	0	82.333	38.611	0	82.2967	45.6234	0.285714	0	84.393	26.2881	34.1267	TRUE	FALSE	4	3	TRUE	32.0515	36.8937	-0.202985	-0.230112
1370	1	HNRDL_MOUSE	HNRDL_MOUSE		29.9	301	33560	Heterogeneous nuclear ribonucleoprotein D-like OS=Mus musculus GN=Hnrpdl PE=1 SV=1	851	170	0.2	144	96	93	172	132	103	111	17	19	25	24	28	19	38	24.048	26.791	33.705	35.543	36.103	28.657	50.035	37.1497	21.2559	27.5947	46.2204	44.2536	25.1806	34.9513	33.8009	TRUE	FALSE	4	3	TRUE	33.0552	34.7951	-0.0740096	-0.0569897
628	1	UD19_MOUSE	UD19_MOUSE		18.6	528	60009	UDP-glucuronosyltransferase 1-9 OS=Mus musculus GN=Ugt1a9 PE=1 SV=2	409	161	0.394	47	64	84	38	42	56	78	26	17	35	15	21	22	25	32.825	26.392	48.582	19.792	34.049	32.789	36.207	49.1114	21.1989	39.5117	31.267	42.4356	28.4494	24.1724	33.7352	TRUE	TRUE	4	3	TRUE	35.2722	31.6858	0.154697	0.18923
290	1	PROX1_MOUSE	PROX1_MOUSE		42.5	737	83127	Prospero homeobox protein 1 OS=Mus musculus GN=Prox1 PE=1 SV=2	248	248	1	9	57	51	6	8	54	63	9	57	51	6	8	54	63	9	57	51	6	8	54	63	14.8989	50.5714	40.9047	13.7659	12.2857	50.5714	47.8571	32.9793	TRUE	TRUE	4	3	TRUE	30.0352	36.9048	-0.297152	-0.885185
1212	1	FIP1_MOUSE	FIP1_MOUSE		26.7	581	64960	Pre-mRNA 3'-end-processing factor FIP1 OS=Mus musculus GN=Fip1l1 PE=1 SV=1	221	221	1	26	33	31	20	34	19	58	26	33	31	20	34	19	58	26	33	31	20	34	19	58	39.7726	28.6173	25.5714	32.835	42.12	16.9024	43.4031	32.746	TRUE	TRUE	4	3	TRUE	31.6991	34.1419	-0.107101	-0.422597
1193	1	SARNP_MOUSE	SARNP_MOUSE		38.1	210	23534	SAP domain-containing ribonucleoprotein OS=Mus musculus GN=Sarnp PE=1 SV=3	224	224	1	22	38	33	36	32	33	30	22	38	33	36	32	33	30	22	38	33	36	32	33	30	33.5016	32.4071	27.4149	46.5	39.7726	29.5617	19.2857	32.6348	TRUE	TRUE	4	3	TRUE	34.9559	29.54	0.242866	0.356606
505	1	SNUT2_MOUSE	SNUT2_MOUSE		27	564	65147	U4/U6.U5 tri-snRNP-associated protein 2 OS=Mus musculus GN=Usp39 PE=2 SV=2	231	231	1	20	37	45	21	19	36	53	20	37	45	21	19	36	53	20	37	45	21	19	36	53	29.5714	31.267	37.1497	33.3661	26.2881	32.7143	37.7143	32.5816	TRUE	TRUE	4	3	TRUE	32.8386	32.2389	0.0265886	-0.175953
873	1	CHERP_MOUSE	CHERP_MOUSE		22.9	936	106170	Calcium homeostasis endoplasmic reticulum protein OS=Mus musculus GN=Cherp PE=1 SV=1	233	233	1	14	40	49	16	23	33	58	14	40	49	16	23	33	58	14	40	49	16	23	33	58	22	33.9439	40.3011	27.1429	31.8263	28.8516	43.0377	32.4433	TRUE	TRUE	4	3	TRUE	30.847	34.5719	-0.16447	-0.743985
299	1	DHI1_MOUSE	DHI1_MOUSE		20.9	292	32365	Corticosteroid 11-beta-dehydrogenase isozyme 1 OS=Mus musculus GN=Hsd11b1 PE=1 SV=3	214	214	1	32	35	34	45	13	23	32	32	35	34	45	13	23	32	32	35	34	45	13	23	32	46.5	29.5617	27.9841	61.2857	19.1076	20.1949	20.1939	32.1183	TRUE	TRUE	4	3	TRUE	41.3329	19.8321	1.05945	2.38467
750	1	SYMPK_MOUSE	SYMPK_MOUSE		27.7	1284	142285	Symplekin OS=Mus musculus GN=Sympk PE=1 SV=1	227	227	1	20	39	41	9	16	43	59	20	39	41	9	16	43	59	20	39	41	9	16	43	59	30.0857	32.835	33.5016	18.0354	23.4621	40.9047	44.2536	31.8683	TRUE	TRUE	4	3	TRUE	28.6144	36.2068	-0.339518	-1.19384
1056	1	PRPF3_MOUSE	PRPF3_MOUSE		32.5	683	77456	U4/U6 small nuclear ribonucleoprotein Prp3 OS=Mus musculus GN=Prpf3 PE=1 SV=1	206	206	1	43	25	29	18	38	27	26	43	25	29	18	38	27	26	43	25	29	18	38	27	26	58.3	19.6857	23.4621	30.0067	47	23.625	16.4286	31.2154	TRUE	TRUE	4	3	TRUE	32.8636	29.0179	0.179551	0.17251
613	1	DDX3X_MOUSE	DDX3X_MOUSE		40.8	662	73102	ATP-dependent RNA helicase DDX3X OS=Mus musculus GN=Ddx3x PE=1 SV=3	741	30	0.04	125	97	112	102	120	100	85	2	4	8	1	0	5	10	18.654	45.614	59.116	20.211	0	37.541	49.893	27.704	39.3707	49.1114	33.229	0.428571	34.4059	33.9439	31.1705	TRUE	FALSE	4	3	TRUE	37.3538	22.9261	0.704264	1.57341
666	1	CPSF6_MOUSE	CPSF6_MOUSE		23.8	551	59154	Cleavage and polyadenylation specificity factor subunit 6 OS=Mus musculus GN=Cpsf6 PE=1 SV=1	210	210	1	19	27	30	44	29	23	38	19	27	30	44	29	23	38	19	27	30	44	29	23	38	28.221	21.6271	24.4816	59.5173	36.378	20.3771	25.5714	30.8819	TRUE	TRUE	4	3	TRUE	33.4618	27.4422	0.286117	0.362116
897	1	BCLF1_MOUSE	BCLF1_MOUSE		26.2	919	106003	Bcl-2-associated transcription factor 1 OS=Mus musculus GN=Bclaf1 PE=1 SV=2	224	215	0.96	17	42	38	18	19	43	47	17	40	37	18	19	38	46	17	40.544	37.247	18	19	39.195	46.284	26.5714	34.248	29.7336	29.7336	26.4286	35.9489	31.8263	30.6415	TRUE	TRUE	4	3	TRUE	30.0716	31.4012	-0.0624178	-0.56094
99	1	API5_MOUSE	API5_MOUSE		33.7	504	56772	Apoptosis inhibitor 5 OS=Mus musculus GN=Api5 PE=2 SV=1	208	208	1	28	28	30	34	31	28	29	28	28	30	34	31	28	29	28	28	30	34	31	28	29	42.12	22.2857	23.7143	45.6234	38.1673	24	18	30.5587	TRUE	TRUE	4	3	TRUE	33.4359	26.7224	0.323345	0.475006
209	1	VIME_MOUSE	VIME_MOUSE		47.6	466	53689	Vimentin OS=Mus musculus GN=Vim PE=1 SV=3	223	188	0.843	18	48	39	29	16	36	37	13	41	34	24	11	33	32	15.955	46.093	37.64	28.8	13.871	34.53	34.342	24.3351	40.9047	30.2827	40.3011	20.553	30.65	23.0229	30.0071	TRUE	TRUE	4	3	TRUE	33.9559	24.742	0.456704	0.759856
848	1	RAE1L_MOUSE	RAE1L_MOUSE		35.3	368	40966	mRNA export factor OS=Mus musculus GN=Rae1 PE=1 SV=1	218	218	1	11	46	47	8	11	45	50	11	46	47	8	11	45	50	11	46	47	8	11	45	50	17.8571	40.1184	38.6009	16.5047	16.7143	43.6576	34.7143	29.7382	TRUE	TRUE	4	3	TRUE	28.2703	31.6954	-0.164986	-0.972753
1070	1	PSIP1_MOUSE	PSIP1_MOUSE		29.9	528	59698	PC4 and SFRS1-interacting protein OS=Mus musculus GN=Psip1 PE=1 SV=1	203	199	0.98	21	33	30	21	22	33	43	21	33	30	21	22	33	39	21	33	30	21	22	33	41.889	32.1429	28.4494	24.5714	34.248	30.8417	29.1877	28.304	29.6779	TRUE	TRUE	4	3	TRUE	29.8529	29.4445	0.0198755	-0.397186
1120	1	CPSF5_MOUSE	CPSF5_MOUSE		57.3	227	26241	Cleavage and polyadenylation specificity factor subunit 5 OS=Mus musculus GN=Nudt21 PE=2 SV=1	197	197	1	24	31	31	37	29	21	24	24	31	31	37	29	21	24	24	31	31	37	29	21	24	36.378	25.5714	25.5714	47.8571	36.8536	18.604	15.2857	29.4459	TRUE	TRUE	4	3	TRUE	33.8445	23.5811	0.521291	0.754439
384	1	ACTA_MOUSE	ACTA_MOUSE		35.3	377	42010	Actin, aortic smooth muscle OS=Mus musculus GN=Acta2 PE=1 SV=1	580	160	0.276	57	95	105	82	56	69	116	0	32	48	1	5	6	68	0	50.903	69.606	1.93	7.648	13.132	86.651	0	44.2536	60.2294	5.70429	11.9701	10.6379	72.1143	29.2728	TRUE	FALSE	4	3	TRUE	27.5468	31.5741	-0.196856	-1.04104
1374	1	RED_MOUSE	RED_MOUSE		36.8	557	65518	Protein Red OS=Mus musculus GN=Ik PE=2 SV=1	211	211	1	6	50	46	16	9	42	42	6	50	46	16	9	42	42	6	50	46	16	9	42	42	11.9701	43.6576	37.851	27.704	14.459	39.7726	28.8516	29.1808	TRUE	TRUE	4	3	TRUE	30.2957	27.6944	0.129519	-0.148269
268	1	ACSL1_MOUSE	ACSL1_MOUSE		32	699	77924	Long-chain-fatty-acid--CoA ligase 1 OS=Mus musculus GN=Acsl1 PE=1 SV=1	224	155	0.692	7	40	75	13	16	34	39	2	31	60	6	6	24	26	4.5	38.154	74.754	13	12.667	32.889	36.563	8.78571	32.4506	68.6657	22.4286	18.8763	28.6173	24.3661	29.17	TRUE	TRUE	4	3	TRUE	33.0826	23.9532	0.465854	0.781784
867	1	RPB2_MOUSE	RPB2_MOUSE		28.4	1174	133912	DNA-directed RNA polymerase II subunit RPB2 OS=Mus musculus GN=Polr2b PE=2 SV=2	204	204	1	20	40	43	11	16	39	35	20	40	43	11	16	39	35	20	40	43	11	16	39	35	30.2827	33.5973	35.5753	20.5397	23.5156	35.5753	23.5407	28.9467	TRUE	TRUE	4	3	TRUE	29.9988	27.5439	0.123172	-0.0116226
625	1	SPT6H_MOUSE	SPT6H_MOUSE		32.6	1726	199087	Transcription elongation factor SPT6 OS=Mus musculus GN=Supt6h PE=1 SV=2	217	217	1	15	45	47	2	15	38	55	15	45	47	2	15	38	55	15	45	47	2	15	38	55	23.5156	38.1673	38.1673	6.42857	22.4286	34.7143	38.9296	28.9073	TRUE	TRUE	4	3	TRUE	26.5697	32.0241	-0.269379	-1.05246
353	1	MGN_MOUSE	MGN_MOUSE		37.7	146	17165	Protein mago nashi homolog OS=Mus musculus GN=Magoh PE=2 SV=1	200	200	1	19	33	30	27	23	34	34	19	33	30	27	23	34	34	19	33	30	27	23	34	34	28	27.9841	24.1724	38.8089	31.4	30.0067	21.9411	28.9019	TRUE	TRUE	4	3	TRUE	29.7414	27.7826	0.0982879	-0.0816394
264	1	RL18_MOUSE	RL18_MOUSE		23.9	188	21646	60S ribosomal protein L18 OS=Mus musculus GN=Rpl18 PE=2 SV=3	196	196	1	21	29	30	42	21	23	30	21	29	30	42	21	23	30	21	29	30	42	21	23	30	31.267	23.7143	24	54.4506	29.1877	20.1939	19	28.8305	TRUE	TRUE	4	3	TRUE	33.358	22.7939	0.549386	1.14309
130	1	ZFR_MOUSE	ZFR_MOUSE		35.4	1074	116860	Zinc finger RNA-binding protein OS=Mus musculus GN=Zfr PE=1 SV=2	210	210	1	16	44	41	12	18	35	44	16	44	41	12	18	35	44	16	44	41	12	18	35	44	24.3661	37.1497	32.7143	21.1989	25.4286	30.8417	30.0857	28.8264	TRUE	TRUE	4	3	TRUE	28.8573	28.7853	0.0035999	-0.221713
1010	1	NCOA5_MOUSE	NCOA5_MOUSE		35.6	579	65320	Nuclear receptor coactivator 5 OS=Mus musculus GN=Ncoa5 PE=1 SV=1	200	200	1	14	35	31	17	31	35	37	14	35	31	17	31	35	37	14	35	31	17	31	35	37	22.4286	29.5714	25.4286	28.4494	38.6009	31.8263	24.8297	28.7336	TRUE	TRUE	4	3	TRUE	26.4695	31.7523	-0.26253	-0.8654
272	1	H11_MOUSE	H11_MOUSE		22.5	213	21786	Histone H1.1 OS=Mus musculus GN=Hist1h1a PE=2 SV=2	648	131	0.202	116	105	64	130	87	82	64	22	29	11	32	16	11	10	29.359	42.775	17.407	41.924	21.596	17.619	16	43.4031	36.378	13.4867	52.576	30.2827	14.716	9.71429	28.651	TRUE	FALSE	4	3	TRUE	36.461	18.2377	0.999432	2.23936
578	1	IMA1_MOUSE	IMA1_MOUSE		22.7	538	60184	Importin subunit alpha-1 OS=Mus musculus GN=Kpna1 PE=1 SV=2	281	59	0.21	24	52	50	22	27	54	52	4	14	8	6	5	12	10	17.333	40.6	29	18	17.222	40	34.706	26.7619	34.4059	23.2053	29.5714	25.1806	37.3121	23.2053	28.5203	TRUE	FALSE	4	3	TRUE	28.4861	28.566	-0.00404056	-0.00504395
83	1	CPSF2_MOUSE	CPSF2_MOUSE		37.1	782	88384	Cleavage and polyadenylation specificity factor subunit 2 OS=Mus musculus GN=Cpsf2 PE=1 SV=1	205	205	1	22	39	33	9	11	41	50	22	39	33	9	11	41	50	22	39	33	9	11	41	50	32.4071	32.7143	26.5714	17.7947	16.421	38.8089	34.248	28.4236	TRUE	TRUE	4	3	TRUE	27.3719	29.826	-0.123873	-0.345413
862	1	PABP2_MOUSE	PABP2_MOUSE		28.8	302	32298	Polyadenylate-binding protein 2 OS=Mus musculus GN=Pabpn1 PE=2 SV=3	181	181	1	39	20	19	33	37	14	19	39	20	19	33	37	14	19	39	20	19	33	37	14	19	54.4506	15.2857	15.2494	44.511	45.6234	11.2219	11.8571	28.3142	TRUE	TRUE	4	3	TRUE	32.3742	22.9008	0.499445	1.15328
434	1	HDAC2_MOUSE	HDAC2_MOUSE		24.4	488	55303	Histone deacetylase 2 OS=Mus musculus GN=Hdac2 PE=1 SV=1	345	149	0.432	31	48	61	31	44	72	58	6	24	27	5	18	39	30	8.459	32.471	37.432	8.171	23.85	52.839	40.244	14.3513	27.234	30.0067	17.1673	32.4071	49.1114	27.5947	28.2675	TRUE	TRUE	4	3	TRUE	22.1898	36.3711	-0.712894	-1.71464
1018	1	RBM47_MOUSE	RBM47_MOUSE		24.2	590	64063	RNA-binding protein 47 OS=Mus musculus GN=Rbm47 PE=2 SV=1	189	189	1	25	27	25	33	20	25	34	25	27	25	33	20	25	34	25	27	25	33	20	25	34	37.7143	21.9411	20.7766	44.6786	27.9841	22	22.6866	28.2545	TRUE	TRUE	4	3	TRUE	31.2776	24.2236	0.36872	0.93596
819	1	NUP54_MOUSE	NUP54_MOUSE		34.5	510	55733	Nuclear pore complex protein Nup54 OS=Mus musculus GN=Nup54 PE=1 SV=1	202	202	1	14	42	33	14	20	31	48	14	42	33	14	20	31	48	14	42	33	14	20	31	48	22	35.6831	26.8571	24.3351	27.5947	26.8571	33.3661	28.0991	TRUE	TRUE	4	3	TRUE	27.2189	29.2727	-0.104948	-0.210888
447	1	CBX1_MOUSE	CBX1_MOUSE		45.9	185	21419	Chromobox protein homolog 1 OS=Mus musculus GN=Cbx1 PE=1 SV=1	296	146	0.493	17	41	52	48	55	27	56	13	12	30	25	25	14	27	13.703	20.286	39.296	32.468	34.868	17.792	38.515	21.4576	15.815	31.6137	43.9801	42.6954	14.8989	26.1973	28.094	TRUE	TRUE	4	3	TRUE	28.2166	27.9305	0.0147019	0.0779091
241	1	CELF1_MOUSE	CELF1_MOUSE		18.3	486	52108	CUGBP Elav-like family member 1 OS=Mus musculus GN=Celf1 PE=1 SV=2	213	163	0.765	12	45	43	10	16	37	50	10	35	33	10	5	30	40	12	42.447	41.919	10	14.167	36.563	48.511	18.604	35.9489	34.248	19.1076	21.7271	33.3661	33.5016	28.0719	TRUE	TRUE	4	3	TRUE	26.9771	29.5316	-0.130525	-0.259523
580	1	RBBP7_MOUSE	RBBP7_MOUSE		25.6	425	47791	Histone-binding protein RBBP7 OS=Mus musculus GN=Rbbp7 PE=1 SV=1	525	59	0.112	64	62	72	62	92	84	89	5	8	10	1	2	12	21	22.353	32	29.375	5.692	14.857	39.871	55.829	33.5973	26.7143	23.625	13.169	21.9796	36.378	40.1184	27.9402	TRUE	FALSE	4	3	TRUE	24.2764	32.8253	-0.435256	-1.0269
631	1	NUP62_MOUSE	NUP62_MOUSE		23	526	53256	Nuclear pore glycoprotein p62 OS=Mus musculus GN=Nup62 PE=1 SV=2	201	201	1	13	24	26	15	12	40	71	13	24	26	15	12	40	71	13	24	26	15	12	40	71	20.6974	18.5	21.1989	25.4286	18.2369	37.7143	53.578	27.9077	TRUE	TRUE	4	3	TRUE	21.4562	36.5097	-0.766885	-1.8213
1172	1	SK2L2_MOUSE	SK2L2_MOUSE		26.5	1040	117637	Superkiller viralicidic activity 2-like 2 OS=Mus musculus GN=Skiv2l2 PE=2 SV=1	197	197	1	12	31	42	11	20	39	42	12	31	42	11	20	39	42	12	31	42	11	20	39	42	19.6857	25.9234	34.9513	20.7766	28.221	35.6831	28.7143	27.7079	TRUE	TRUE	4	3	TRUE	25.3342	30.8728	-0.285248	-0.676437
326	1	CP2AC_MOUSE	CP2AC_MOUSE		36.6	492	56174	Cytochrome P450 2A12 OS=Mus musculus GN=Cyp2a12 PE=1 SV=1	210	160	0.762	15	35	45	22	10	35	48	15	24	34	17	10	28	32	15	31.543	44.389	22	10	33.444	41.846	23.2053	26.2881	36.627	34.7143	15	29.7336	28.221	27.6842	TRUE	TRUE	4	3	TRUE	30.2087	24.3182	0.312927	0.734314
975	1	HNRL1_MOUSE	HNRL1_MOUSE		31.3	859	96003	Heterogeneous nuclear ribonucleoprotein U-like protein 1 OS=Mus musculus GN=Hnrnpul1 PE=1 SV=1	203	203	1	9	45	35	14	9	30	61	9	45	35	14	9	30	61	9	45	35	14	9	30	61	15.3277	38.6009	28.4494	24.4816	14	26.4286	46	27.6126	TRUE	TRUE	4	3	TRUE	26.7149	28.8095	-0.108902	-0.311855
871	1	TCRG1_MOUSE	TCRG1_MOUSE		25.3	1100	123789	Transcription elongation regulator 1 OS=Mus musculus GN=Tcerg1 PE=1 SV=2	200	195	0.975	13	37	42	16	18	33	41	12	36	42	16	17	32	40	12.099	36.254	42	16	17.136	32.239	40.274	19.8713	30.4649	34.7143	26.8571	24.8297	28.304	27.704	27.535	TRUE	TRUE	4	3	TRUE	27.9769	26.9459	0.0541697	0.162983
1002	1	MK67I_MOUSE	MK67I_MOUSE		30.6	317	36266	MKI67 FHA domain-interacting nucleolar phosphoprotein OS=Mus musculus GN=Mki67ip PE=2 SV=1	186	186	1	19	29	23	26	32	28	29	19	29	23	26	32	28	29	19	29	23	26	32	28	29	28.6173	24.1724	19.1076	37.851	39.5117	24.5714	18.5	27.4759	TRUE	TRUE	4	3	TRUE	27.4371	27.5277	-0.00475832	-0.0489521
956	1	NUP53_MOUSE	NUP53_MOUSE		51.7	325	34787	Nucleoporin NUP53 OS=Mus musculus GN=Nup35 PE=1 SV=2	184	184	1	19	21	23	21	36	30	34	19	21	23	21	36	30	34	19	21	23	21	36	30	34	28.4494	16.4286	19	33.9439	43.9801	26.2881	22.5714	27.2374	TRUE	TRUE	4	3	TRUE	24.4555	30.9466	-0.339623	-0.905439
1384	1	ACL6A_MOUSE	ACL6A_MOUSE		33.3	429	47449	Actin-like protein 6A OS=Mus musculus GN=Actl6a PE=1 SV=2	182	182	1	18	29	30	22	21	29	33	18	29	30	22	21	29	33	18	29	30	22	21	29	33	27.234	24.3661	24.9006	34.9513	30.0857	25.5714	21.7271	26.9766	TRUE	TRUE	4	3	TRUE	27.863	25.7948	0.111272	0.210687
1257	1	NMNA1_MOUSE	NMNA1_MOUSE		42.5	285	32356	Nicotinamide mononucleotide adenylyltransferase 1 OS=Mus musculus GN=Nmnat1 PE=1 SV=2	179	179	1	30	34	24	14	17	19	41	30	34	24	14	17	19	41	30	34	24	14	17	19	41	44.9953	29.3074	20.1949	24.5714	24.5714	16.9591	28	26.9428	TRUE	TRUE	4	3	TRUE	29.7673	23.1769	0.361041	0.719593
1138	1	RPR1B_MOUSE	RPR1B_MOUSE		41.1	326	36885	Regulation of nuclear pre-mRNA domain-containing protein 1B OS=Mus musculus GN=Rprd1b PE=2 SV=2	182	170	0.934	20	33	27	37	16	25	24	20	31	25	36	16	22	20	20	32.722	26.923	37	16	24.87	23.333	30.65	27.4149	21.7271	48.2857	23.7143	21.6271	15.1333	26.9361	TRUE	TRUE	4	3	TRUE	32.0194	20.1582	0.667578	1.41393
252	1	CP2F2_MOUSE	CP2F2_MOUSE		36.5	491	55950	Cytochrome P450 2F2 OS=Mus musculus GN=Cyp2f2 PE=2 SV=1	207	206	0.995	2	33	69	4	7	40	52	2	33	68	4	7	40	52	2	33	68.618	4	7	40	52	3.75	27.5947	58.3	10.2857	10.8571	36.627	36.627	26.2917	TRUE	TRUE	4	3	TRUE	24.9826	28.037	-0.16641	-0.616396
1079	1	RBM10_MOUSE	RBM10_MOUSE		28.5	930	103495	RNA-binding protein 10 OS=Mus musculus GN=Rbm10 PE=1 SV=1	179	179	1	16	27	32	17	21	30	36	16	27	32	17	21	30	36	16	27	32	17	21	30	36	25.4286	21.9796	26.2881	28.6173	29.7336	26.5714	24	26.0884	TRUE	TRUE	4	3	TRUE	25.5784	26.7683	-0.0656017	-0.322535
204	1	HMGN1_MOUSE	HMGN1_MOUSE		34.4	96	10153	Non-histone chromosomal protein HMG-14 OS=Mus musculus GN=Hmgn1 PE=1 SV=2	169	169	1	28	20	30	40	25	11	15	28	20	30	40	25	11	15	28	20	30	40	25	11	15	42.4356	15.2494	23.7143	49.6203	33.3661	8.72243	9	26.0154	TRUE	TRUE	4	3	TRUE	32.7549	17.0295	0.943672	1.66905
792	1	CSTF2_MOUSE	CSTF2_MOUSE		29.1	580	61342	Cleavage stimulation factor subunit 2 OS=Mus musculus GN=Cstf2 PE=1 SV=2	182	107	0.588	19	30	31	26	25	26	25	16	15	15	19	21	14	7	18.182	28.235	29.118	26	24.652	23.882	25	27.4149	23.4621	23.5407	37.7143	32.835	20.6974	16.0944	25.9656	TRUE	TRUE	4	3	TRUE	28.033	23.209	0.272445	0.367249
793	1	ZC3HE_MOUSE	ZC3HE_MOUSE		44.1	735	82410	Zinc finger CCCH domain-containing protein 14 OS=Mus musculus GN=Zc3h14 PE=1 SV=1	183	183	1	12	32	33	12	15	39	40	12	32	33	12	15	39	40	12	32	33	12	15	39	40	19.2857	26.8571	26.7619	21.9411	22.874	34.9513	27.4149	25.7266	TRUE	TRUE	4	3	TRUE	23.7115	28.4134	-0.260986	-0.714137
876	1	SLTM_MOUSE	SLTM_MOUSE		22.5	1031	116920	SAFB-like transcription modulator OS=Mus musculus GN=Sltm PE=1 SV=1	187	187	1	14	30	42	8	13	29	51	14	30	42	8	13	29	51	14	30	42	8	13	29	51	22.2857	24.5714	34.7143	16.7143	19.6694	25.4286	36.378	25.6802	TRUE	TRUE	4	3	TRUE	24.5714	27.1587	-0.144431	-0.549267
91	1	S27A2_MOUSE	S27A2_MOUSE		30.2	620	70367	Very long-chain acyl-CoA synthetase OS=Mus musculus GN=Slc27a2 PE=1 SV=1	177	175	0.989	27	34	38	15	9	25	29	27	32	38	15	9	25	29	27	34	38	15	9	25	29	40.1184	29.1877	30.4649	24.9006	13.4301	21.7271	18	25.4041	TRUE	TRUE	4	3	TRUE	31.1679	17.7191	0.814756	1.02113
145	1	CP1A2_MOUSE	CP1A2_MOUSE		38.8	513	58185	Cytochrome P450 1A2 OS=Mus musculus GN=Cyp1a2 PE=1 SV=1	193	193	1	8	31	49	5	15	35	50	8	31	49	5	15	35	50	8	31	49	5	15	35	50	13.4486	25.1806	39.7726	11.5714	22	31.267	34.4059	25.378	TRUE	TRUE	4	3	TRUE	22.4933	29.2243	-0.377673	-0.994741
1145	1	CTBL1_MOUSE	CTBL1_MOUSE		24.5	563	64981	Beta-catenin-like protein 1 OS=Mus musculus GN=Ctnnbl1 PE=1 SV=1	169	169	1	25	28	33	17	15	20	31	25	28	33	17	15	20	31	25	28	33	17	15	20	31	38.1673	22.5714	27.234	28.7143	23.0229	18	19.6694	25.3399	TRUE	TRUE	4	3	TRUE	29.1718	20.2308	0.528021	0.482752
669	1	ZC11A_MOUSE	ZC11A_MOUSE		40.5	792	86493	Zinc finger CCCH domain-containing protein 11A OS=Mus musculus GN=Zc3h11a PE=1 SV=1	175	175	1	23	32	31	6	17	37	29	23	32	31	6	17	37	29	23	32	31	6	17	37	29	34.6897	26.7619	25.4071	14	24.5714	33.5016	18.4156	25.3353	TRUE	TRUE	4	3	TRUE	25.2147	25.4962	-0.0160179	-0.43995
480	1	NFIA_MOUSE	NFIA_MOUSE		40.8	532	58554	Nuclear factor 1 A-type OS=Mus musculus GN=Nfia PE=1 SV=1	201	131	0.652	30	35	42	27	17	18	32	24	24	29	11	14	8	21	27.512	30.372	36.932	18.743	15.313	12.724	26.949	41.5314	24.8297	29.5617	30.2827	23.2053	10.1034	16.8499	25.1949	TRUE	TRUE	4	3	TRUE	31.5514	16.7195	0.91617	0.739718
1308	1	PNKP_MOUSE	PNKP_MOUSE		47.5	522	57224	Bifunctional polynucleotide phosphatase/kinase OS=Mus musculus GN=Pnkp PE=1 SV=2	177	177	1	4	25	26	6	24	45	47	4	25	26	6	24	45	47	4	25	26	6	24	45	47	8.46429	19.8713	21.4576	14.716	32.7143	43.9801	32.4506	24.8077	TRUE	TRUE	4	3	TRUE	16.1273	36.3817	-1.17371	-1.93228
691	1	TRA2A_MOUSE	TRA2A_MOUSE		23.8	281	32317	Transformer-2 protein homolog alpha OS=Mus musculus GN=Tra2a PE=1 SV=1	188	170	0.904	13	32	26	15	23	29	50	11	27	23	13	20	28	48	11.786	28.667	23.958	13.388	20.432	28.5	48.828	18.5409	23.5407	19.5654	23.2053	28.6173	24.9006	33.5973	24.5668	TRUE	TRUE	4	3	TRUE	21.2131	29.0384	-0.453007	-1.0508
775	1	PDIP3_MOUSE	PDIP3_MOUSE		50.5	420	46133	Polymerase delta-interacting protein 3 OS=Mus musculus GN=Poldip3 PE=2 SV=1	167	167	1	21	33	27	12	15	27	32	21	33	27	12	15	27	32	21	33	27	12	15	27	32	31.8263	28.304	22	21.7271	22.6866	23.4621	20.4286	24.3478	TRUE	TRUE	4	3	TRUE	25.9644	22.1924	0.226465	-0.110892
310	1	PON1_MOUSE	PON1_MOUSE		22.8	355	39566	Serum paraoxonase/arylesterase 1 OS=Mus musculus GN=Pon1 PE=1 SV=2	155	155	1	27	25	21	43	12	14	13	27	25	21	43	12	14	13	27	25	21	43	12	14	13	40.5306	19.2857	16.8317	56.8067	17.8571	11.1429	7.57143	24.2894	TRUE	TRUE	4	3	TRUE	33.3637	12.1905	1.45252	1.39063
240	1	APEX1_MOUSE	APEX1_MOUSE		41.6	317	35491	DNA-(apurinic or apyrimidinic site) lyase OS=Mus musculus GN=Apex1 PE=1 SV=2	178	178	1	6	42	41	20	9	20	40	6	42	41	20	9	20	40	6	42	41	20	9	20	40	10.8571	35.5753	32.835	31.6137	13.7659	17.1673	27.234	24.1498	TRUE	TRUE	4	3	TRUE	27.7203	19.389	0.5157	0.361388
1097	1	RNPS1_MOUSE	RNPS1_MOUSE		8.9	305	34209	RNA-binding protein with serine-rich domain 1 OS=Mus musculus GN=Rnps1 PE=2 SV=1	148	148	1	32	13	14	31	33	12	13	32	13	14	31	33	12	13	32	13	14	31	33	12	13	47.8571	10.1429	10.8571	42.12	40.3011	9.73657	8	24.145	TRUE	TRUE	4	3	TRUE	27.7443	19.3459	0.520162	0.346508
947	1	PSPC1_MOUSE	PSPC1_MOUSE		40	523	58759	Paraspeckle component 1 OS=Mus musculus GN=Pspc1 PE=1 SV=1	177	177	1	6	31	31	16	10	27	56	6	31	31	16	10	27	56	6	31	31	16	10	27	56	11.392	25.4286	25.4286	27.234	15.2857	23.5407	40.5306	24.12	TRUE	TRUE	4	3	TRUE	22.3708	26.4523	-0.241779	-0.432438
538	1	DDX49_MOUSE	DDX49_MOUSE		7.9	480	54095	Probable ATP-dependent RNA helicase DDX49 OS=Mus musculus GN=Ddx49 PE=2 SV=1	146	146	1	37	8	19	29	32	6	15	37	8	19	29	32	6	15	37	8	19	29	32	6	15	52.576	5.42857	15.0286	40.5306	39.3707	4.57143	9.01343	23.7885	TRUE	TRUE	4	3	TRUE	28.3909	17.6519	0.68561	0.591846
519	1	LBR_MOUSE	LBR_MOUSE		15	626	71441	Lamin-B receptor OS=Mus musculus GN=Lbr PE=1 SV=2	160	160	1	20	26	28	27	20	16	23	20	26	28	27	20	16	23	20	26	28	27	20	16	23	29.7336	20.4286	22.2857	38.9296	27.4149	12.8966	14.3837	23.7247	TRUE	TRUE	4	3	TRUE	27.8444	18.2317	0.610935	0.530173
641	1	CP2CT_MOUSE	CP2CT_MOUSE		38.6	490	55731	Cytochrome P450 2C29 OS=Mus musculus GN=Cyp2c29 PE=1 SV=1	184	71	0.386	15	51	84	8	5	14	7	2	16	42	3	2	6	0	10.714	41.249	80.305	7.3	4.667	13.5	0	16.9591	34.9513	78.9424	15.7101	8.24914	10.7857	0	23.6568	TRUE	TRUE	4	3	TRUE	36.6408	6.34495	2.52977	2.60058
895	1	SPF45_MOUSE	SPF45_MOUSE		31.9	405	45305	Splicing factor 45 OS=Mus musculus GN=Rbm17 PE=1 SV=1	161	161	1	15	24	22	17	27	26	30	15	24	22	17	27	26	30	15	24	22	17	27	26	30	23.7143	18.5409	17.8571	28.221	34.7143	22.5714	19.2119	23.5473	TRUE	TRUE	4	3	TRUE	22.0833	25.4992	-0.207494	-0.249501
587	1	PRP4B_MOUSE	PRP4B_MOUSE		15	1007	116949	Serine/threonine-protein kinase PRP4 homolog OS=Mus musculus GN=Prpf4b PE=1 SV=2	162	162	1	16	37	30	16	12	28	23	16	37	30	16	12	28	23	16	37	30	16	12	28	23	24.5714	31.4	24.3351	26.7619	18.0354	24.4816	14.716	23.4716	TRUE	TRUE	4	3	TRUE	26.7671	19.0777	0.488576	0.452937
1000	1	RBM42_MOUSE	RBM42_MOUSE		23.6	474	49876	RNA-binding protein 42 OS=Mus musculus GN=Rbm42 PE=1 SV=1	155	155	1	22	25	20	11	25	29	23	22	25	20	11	25	29	23	22	25	20	11	25	29	23	33.3661	19.6694	16.4286	20.553	33.5973	25.4286	14.9643	23.4296	TRUE	TRUE	4	3	TRUE	22.5043	24.6634	-0.132171	-0.291359
749	1	VRK1_MOUSE	VRK1_MOUSE		35.9	440	49742	Serine/threonine-protein kinase VRK1 OS=Mus musculus GN=Vrk1 PE=1 SV=2	170	170	1	8	14	20	2	29	36	61	8	14	20	2	29	36	61	8	14	20	2	29	36	61	13.8706	10.7857	16.4286	6.53186	36.627	32.835	45.7143	23.2561	TRUE	TRUE	4	3	TRUE	11.9042	38.3921	-1.68934	-1.79952
457	1	BOP1_MOUSE	BOP1_MOUSE		29.5	732	82547	Ribosome biogenesis protein BOP1 OS=Mus musculus GN=Bop1 PE=1 SV=1	180	180	1	4	28	35	2	12	52	47	4	28	35	2	12	52	47	4	28	35	2	12	52	47	7.28571	22.4286	28.304	6.28571	18	48.2857	32.1429	23.2475	TRUE	TRUE	4	3	TRUE	16.076	32.8095	-1.02921	-1.08972
1061	1	WBP11_MOUSE	WBP11_MOUSE		25.6	641	69876	WW domain-binding protein 11 OS=Mus musculus GN=Wbp11 PE=1 SV=2	153	153	1	25	23	33	8	22	19	23	25	23	33	8	22	19	23	25	23	33	8	22	19	23	37.851	17.8571	27.1429	16.8499	30.65	16.8317	15	23.1689	TRUE	TRUE	4	3	TRUE	24.9252	20.8272	0.259134	0.389524
742	1	PP1RA_MOUSE	PP1RA_MOUSE		28.5	888	94373	Serine/threonine-protein phosphatase 1 regulatory subunit 10 OS=Mus musculus GN=Ppp1r10 PE=1 SV=1	166	166	1	18	25	32	6	10	37	38	18	25	32	6	10	37	38	18	25	32	6	10	37	38	27.1429	19.5419	26.1973	14	15.2857	33.5973	25.9234	23.0983	TRUE	TRUE	4	3	TRUE	21.7205	24.9355	-0.199142	-0.0661243
466	1	FMO5_MOUSE	FMO5_MOUSE		21.6	533	60031	Dimethylaniline monooxygenase [N-oxide-forming] 5 OS=Mus musculus GN=Fmo5 PE=2 SV=3	169	169	1	3	25	29	14	20	32	46	3	25	29	14	20	32	46	3	25	29	14	20	32	46	5.85714	19.4623	22.874	24	27.234	27.704	31.6137	22.6779	TRUE	TRUE	4	3	TRUE	18.0484	28.8506	-0.676732	-0.595907
910	1	PAF1_MOUSE	PAF1_MOUSE		34.4	535	60519	RNA polymerase II-associated factor 1 homolog OS=Mus musculus GN=Paf1 PE=2 SV=1	156	156	1	22	24	28	12	13	23	34	22	24	28	12	13	23	34	22	24	28	12	13	23	34	32.835	18.5714	22.5714	21.9796	19.6857	20.4286	22.4286	22.6429	TRUE	TRUE	4	3	TRUE	23.9894	20.8476	0.202512	0.438431
491	1	LYAR_MOUSE	LYAR_MOUSE		29.1	388	43737	Cell growth-regulating nucleolar protein OS=Mus musculus GN=Lyar PE=1 SV=2	155	155	1	14	21	14	12	37	30	27	14	21	14	12	37	30	27	14	21	14	12	37	30	27	21.9411	16.2494	10.4286	21.6271	44.9953	25.9234	17	22.595	TRUE	TRUE	4	3	TRUE	17.5616	29.3062	-0.738786	-0.580381
1098	1	NOG1_MOUSE	NOG1_MOUSE		28.4	634	74114	Nucleolar GTP-binding protein 1 OS=Mus musculus GN=Gtpbp4 PE=2 SV=3	163	163	1	5	26	37	8	19	33	35	5	26	37	8	19	33	35	5	26	37	8	19	33	35	10.1429	20.8571	29.5714	16.9024	26.7143	29.3074	23.7143	22.4586	TRUE	TRUE	4	3	TRUE	19.3685	26.5787	-0.456559	-0.133313
286	1	RL13_MOUSE	RL13_MOUSE		35.1	211	24306	60S ribosomal protein L13 OS=Mus musculus GN=Rpl13 PE=2 SV=3	149	149	1	16	29	22	16	19	28	19	16	29	22	16	19	28	19	16	29	22	16	19	28	19	24.5714	24	17.8571	26.7143	25.9234	24.1724	11.5714	22.1157	TRUE	TRUE	4	3	TRUE	23.2857	20.5558	0.179902	0.978226
1183	1	DYL2_MOUSE	DYL2_MOUSE		57.3	89	10351	Dynein light chain 2, cytoplasmic OS=Mus musculus GN=Dynll2 PE=1 SV=1	143	121	0.846	25	16	18	20	21	18	25	25	13	14	18	21	15	15	25	15.438	17.5	19.8	21	17.368	22.895	38.6009	12.14	13.5571	31.4	30.0067	14.5191	14.2707	22.0707	TRUE	TRUE	4	3	TRUE	23.9245	19.5989	0.287719	1.20415
456	1	DNLI3_MOUSE	DNLI3_MOUSE		26	1015	113019	DNA ligase 3 OS=Mus musculus GN=Lig3 PE=1 SV=1	160	160	1	9	18	14	2	26	40	51	9	18	14	2	26	40	51	9	18	14	2	26	40	51	15.0956	13.8706	10.3214	6.27571	34.248	37.1497	35.9489	21.8443	TRUE	TRUE	4	3	TRUE	11.3908	35.7822	-1.65137	-2.21697
173	1	CO1A1_MOUSE	CO1A1_MOUSE		6.6	1453	138033	Collagen alpha-1(I) chain OS=Mus musculus GN=Col1a1 PE=1 SV=4	144	144	1	23	19	15	12	27	28	20	23	19	15	12	27	28	20	23	19	15	12	27	28	20	33.9439	14.2234	11.173	21.2121	34.6897	24	12.4286	21.6672	TRUE	TRUE	4	3	TRUE	20.1381	23.7061	-0.23533	0.265677
62	1	LEG9_MOUSE	LEG9_MOUSE		22.4	353	40037	Galectin-9 OS=Mus musculus GN=Lgals9 PE=1 SV=1	157	157	1	10	32	23	7	15	27	43	10	32	23	7	15	27	43	10	32	23	7	15	27	43	15.7101	26.4286	18.4156	15	22	22.874	29.1877	21.3737	TRUE	TRUE	4	3	TRUE	18.8886	24.6872	-0.386252	0.0985636
952	1	THOC1_MOUSE	THOC1_MOUSE		34.7	657	75437	THO complex subunit 1 OS=Mus musculus GN=Thoc1 PE=1 SV=1	151	151	1	12	26	21	6	16	34	36	12	26	21	6	16	34	36	12	26	21	6	16	34	36	19.5419	20.6974	17	14	23.625	30.4649	24	21.3327	TRUE	TRUE	4	3	TRUE	17.8098	26.03	-0.5475	-0.0806194
1058	1	PLRG1_MOUSE	PLRG1_MOUSE		31.2	513	56939	Pleiotropic regulator 1 OS=Mus musculus GN=Plrg1 PE=2 SV=1	152	152	1	8	26	26	10	13	32	37	8	26	26	10	13	32	37	8	26	26	10	13	32	37	14	20.7766	21.2559	19.5654	20.1949	28	24.9006	21.2419	TRUE	TRUE	4	3	TRUE	18.8995	24.3651	-0.366473	0.168811
734	1	NU214_MOUSE	NU214_MOUSE		28.1	2085	212980	Nuclear pore complex protein Nup214 OS=Mus musculus GN=Nup214 PE=1 SV=2	147	147	1	20	19	27	9	13	25	34	20	19	27	9	13	25	34	20	19	27	9	13	25	34	30.0067	14.5191	22	18	19.5654	21.9796	22	21.153	TRUE	TRUE	4	3	TRUE	21.1315	21.1817	-0.00342337	0.644188
1073	1	SMRD2_MOUSE	SMRD2_MOUSE		33.6	456	52283	SWI/SNF-related matrix-associated actin-dependent regulator of chromatin subfamily D member 2 OS=Mus musculus GN=Smarcd2 PE=2 SV=1	148	98	0.662	15	18	22	5	23	21	44	15	7	14	3	14	11	34	15	16.625	21.467	5	23	21	43.444	23.7143	12.6607	17.2497	12.8571	32.1429	18.5714	29.7336	20.99	TRUE	TRUE	4	3	TRUE	16.6205	26.816	-0.690131	-0.255643
354	1	RL27_MOUSE	RL27_MOUSE		41.9	136	15799	60S ribosomal protein L27 OS=Mus musculus GN=Rpl27 PE=2 SV=2	149	149	1	10	27	12	17	14	24	45	10	27	12	17	14	24	45	10	27	12	17	14	24	45	16.2494	21.4576	8.46429	28	20.7766	20.8571	30.8417	20.9495	TRUE	TRUE	4	3	TRUE	18.5428	24.1585	-0.381669	0.253274
283	1	RL6_MOUSE	RL6_MOUSE		34.1	296	33511	60S ribosomal protein L6 OS=Mus musculus GN=Rpl6 PE=1 SV=3	156	156	1	4	33	27	10	7	36	39	4	33	27	10	7	36	39	4	33	27	10	7	36	39	7.28571	27.704	21.9796	19.2119	10.8571	32.1429	26.4286	20.8014	TRUE	TRUE	4	3	TRUE	19.0453	23.1429	-0.281133	0.331676
659	1	SMCA2_MOUSE	SMCA2_MOUSE		25.3	1577	180254	Probable global transcription activator SNF2L2 OS=Mus musculus GN=Smarca2 PE=1 SV=1	169	113	0.669	13	32	35	16	14	23	36	13	19	19	15	14	11	22	13	26.485	28.806	15.833	14	16.739	31.935	20.7766	21.2121	22.6866	26.1973	20.9611	13.8199	19.8479	20.7859	TRUE	TRUE	4	3	TRUE	22.7181	18.2096	0.319144	1.00889
1261	1	PESC_MOUSE	PESC_MOUSE		28.4	584	67797	Pescadillo homolog OS=Mus musculus GN=Pes1 PE=1 SV=1	143	143	1	7	29	23	6	20	33	25	7	29	23	6	20	33	25	7	29	23	6	20	33	25	12.9196	24.3351	19.2857	14.459	28.304	29.5714	16.2494	20.732	TRUE	TRUE	4	3	TRUE	17.7499	24.7083	-0.477188	0.0862571
1233	1	RRMJ3_MOUSE	RRMJ3_MOUSE		29.2	838	95533	Putative rRNA methyltransferase 3 OS=Mus musculus GN=Ftsj3 PE=1 SV=1	144	144	1	5	23	21	8	33	22	32	5	23	21	8	33	22	32	5	23	21	8	33	22	32	10.3214	18	17.1616	17	40.5306	19.8713	20.6974	20.5118	TRUE	TRUE	4	3	TRUE	15.6207	27.0331	-0.791263	-0.354522
203	1	HS71B_MOUSE	HS71B_MOUSE		44.5	642	70177	Heat shock 70 kDa protein 1B OS=Mus musculus GN=Hspa1b PE=1 SV=3	476	109	0.229	52	52	51	64	82	76	99	2	5	7	0	24	31	40	2.203	9.723	11.965	0	30.177	44.264	57.84	5.17186	6.53186	8.42357	0	37.851	43.0377	42.12	20.448	TRUE	FALSE	4	3	TRUE	5.03182	41.0029	-3.02657	-3.0081
72	1	TCOF_MOUSE	TCOF_MOUSE		19.2	1320	135002	Treacle protein OS=Mus musculus GN=Tcof1 PE=1 SV=1	137	137	1	17	16	16	14	25	24	25	17	16	16	14	25	24	25	17	16	16	14	25	24	25	25.5714	12.2857	11.8571	23.4621	33.229	20.7766	15.4286	20.3729	TRUE	TRUE	4	3	TRUE	18.2941	23.1447	-0.339304	0.170018
1251	1	NB5R3_MOUSE	NB5R3_MOUSE		36.5	301	34129	NADH-cytochrome b5 reductase 3 OS=Mus musculus GN=Cyb5r3 PE=1 SV=3	136	136	1	14	23	17	11	16	25	30	14	23	17	11	16	25	30	14	23	17	11	16	25	30	22.7909	18	13.272	20.8571	24	22.4286	19.2857	20.0906	TRUE	TRUE	4	3	TRUE	18.73	21.9048	-0.225894	0.274296
263	1	RL12_MOUSE	RL12_MOUSE		45.5	165	17806	60S ribosomal protein L12 OS=Mus musculus GN=Rpl12 PE=1 SV=2	141	141	1	16	17	19	11	20	16	42	16	17	19	11	20	16	42	16	17	19	11	20	16	42	24.4816	12.8571	14.9643	19.8479	27.1429	12.8571	28.4494	20.0858	TRUE	TRUE	4	3	TRUE	18.0377	22.8165	-0.339059	0.0985172
707	1	WDR43_MOUSE	WDR43_MOUSE		22.6	677	75382	WD repeat-containing protein 43 OS=Mus musculus GN=Wdr43 PE=1 SV=2	143	143	1	6	22	23	11	14	30	37	6	22	23	11	14	30	37	6	22	23	11	14	30	37	11.2219	17	18.5714	20.4286	21.1989	26.0924	24.5714	19.8692	TRUE	TRUE	4	3	TRUE	16.8055	23.9542	-0.511351	-0.0980526
536	1	SRBD1_MOUSE	SRBD1_MOUSE		26.8	1015	114093	S1 RNA-binding domain-containing protein 1 OS=Mus musculus GN=Srbd1 PE=1 SV=2	150	150	1	4	13	6	1	7	56	63	4	13	6	1	7	56	63	4	13	6	1	7	56	63	7.28571	9.73657	4.20886	3.90443	11.1429	53.578	48.5187	19.7679	TRUE	TRUE	4	3	TRUE	6.28389	37.7465	-2.58661	-2.4185
1249	1	SYF1_MOUSE	SYF1_MOUSE		29.7	855	99989	Pre-mRNA-splicing factor SYF1 OS=Mus musculus GN=Xab2 PE=2 SV=1	135	135	1	16	31	18	7	8	21	34	16	31	18	7	8	21	34	16	31	18	7	8	21	34	25.4286	26.0924	14.3513	15.2857	12.8571	19	22.7909	19.4009	TRUE	TRUE	4	3	TRUE	20.2895	18.216	0.155527	0.48772
1090	1	CSTF1_MOUSE	CSTF1_MOUSE		37.6	431	48383	Cleavage stimulation factor subunit 1 OS=Mus musculus GN=Cstf1 PE=2 SV=1	136	136	1	8	32	24	14	7	23	28	8	32	24	14	7	23	28	8	32	24	14	7	23	28	14	27.1429	19.8713	24.5714	11.5714	20.5397	17.8571	19.3648	TRUE	TRUE	4	3	TRUE	21.3964	16.6561	0.361317	0.665928
357	1	WDR5_MOUSE	WDR5_MOUSE		33.8	334	36589	WD repeat-containing protein 5 OS=Mus musculus GN=Wdr5 PE=2 SV=1	130	130	1	15	25	25	13	13	21	18	15	25	25	13	13	21	18	15	25	25	13	13	21	18	23.4621	19.2857	20.4286	22.6866	19.2119	18.5	11.1429	19.2454	TRUE	TRUE	4	3	TRUE	21.4657	16.2849	0.398501	0.674725
226	1	CDK11_MOUSE	CDK11_MOUSE		19	784	91514	Cell division protein kinase 11 OS=Mus musculus GN=Cdk11 PE=1 SV=2	145	145	1	7	29	24	5	9	31	40	7	29	24	5	9	31	40	7	29	24	5	9	31	40	12.2619	23.625	19.6694	11.5714	13.5571	26.7143	27.1429	19.2203	TRUE	TRUE	4	3	TRUE	16.7819	22.4714	-0.421183	-0.215224
1196	1	SPF27_MOUSE	SPF27_MOUSE		52.4	225	26132	Pre-mRNA-splicing factor SPF27 OS=Mus musculus GN=Bcas2 PE=2 SV=1	144	144	1	4	28	41	6	8	14	43	4	28	41	6	8	14	43	4	28	41	6	8	14	43	8.19643	22.7909	33.5973	14.3513	12.8571	11.5714	29.5714	18.9908	TRUE	TRUE	4	3	TRUE	19.734	18	0.132684	0.312392
675	1	INT1_MOUSE	INT1_MOUSE		17.4	2195	245169	Integrator complex subunit 1 OS=Mus musculus GN=Ints1 PE=1 SV=2	141	141	1	10	22	26	3	10	31	39	10	22	26	3	10	31	39	10	22	26	3	10	31	39	16.4286	16.9591	21.2121	8.948	15.2857	26.7619	26.7619	18.9082	TRUE	TRUE	4	3	TRUE	15.887	22.9365	-0.5298	-0.686464
1291	1	RPF2_MOUSE	RPF2_MOUSE		19.3	306	35365	Ribosome production factor 2 homolog OS=Mus musculus GN=Rpf2 PE=2 SV=2	138	138	1	6	33	29	3	7	27	33	6	33	29	3	7	27	33	6	33	29	3	7	27	33	11.6796	28.7143	23.5156	9.71429	11.8571	23.7143	21.6271	18.6889	TRUE	TRUE	4	3	TRUE	18.4059	19.0662	-0.0508461	-0.0324924
556	1	LC7L3_MOUSE	LC7L3_MOUSE		21.3	432	51451	Luc7-like protein 3 OS=Mus musculus GN=Luc7l3 PE=1 SV=1	136	136	1	12	32	25	8	4	22	33	12	32	25	8	4	22	33	12	32	25	8	4	22	33	18.8763	26.5714	20.553	16.4286	7.31614	19.4623	21.2121	18.6314	TRUE	TRUE	4	3	TRUE	20.6073	15.9969	0.365369	0.560718
445	1	PHF5A_MOUSE	PHF5A_MOUSE		40.9	110	12406	PHD finger-like domain-containing protein 5A OS=Mus musculus GN=Phf5a PE=2 SV=1	131	131	1	9	24	25	10	11	28	24	9	24	25	10	11	28	24	9	24	25	10	11	28	24	15.0286	18.4156	20.5397	19.4623	16.4286	24.3661	15.2857	18.5038	TRUE	TRUE	4	3	TRUE	18.3615	18.6935	-0.0258481	0.0114827
242	1	RXRA_MOUSE	RXRA_MOUSE		29.3	467	51218	Retinoic acid receptor RXR-alpha OS=Mus musculus GN=Rxra PE=1 SV=1	130	101	0.777	17	29	36	8	7	14	19	17	21	25	8	7	14	9	17	29	36	8	7	14	19	25.9234	23.7143	28.7143	16.4286	10.8571	11	11.5714	18.3156	TRUE	TRUE	4	3	TRUE	23.6951	11.1429	1.08847	1.47124
468	1	RLA2_MOUSE	RLA2_MOUSE		69.6	115	11652	60S acidic ribosomal protein P2 OS=Mus musculus GN=Rplp2 PE=1 SV=3	116	116	1	20	13	17	18	19	13	16	20	13	17	18	19	13	16	20	13	17	18	19	13	16	29.5617	9.72071	12.6984	29.3074	26.1973	10.2857	9.71429	18.2122	TRUE	TRUE	4	3	TRUE	20.3221	15.3991	0.400202	0.62327
397	1	RL31_MOUSE	RL31_MOUSE		26.4	125	14464	60S ribosomal protein L31 OS=Mus musculus GN=Rpl31 PE=2 SV=1	108	108	1	26	13	10	14	23	11	11	26	13	10	14	23	11	11	26	13	10	14	23	11	11	39.3707	9.71429	7.28571	23.7143	31.6137	8.78157	6.42857	18.1298	TRUE	TRUE	4	3	TRUE	20.0213	15.608	0.359251	0.563741
488	1	CP2E1_MOUSE	CP2E1_MOUSE		25.6	493	56806	Cytochrome P450 2E1 OS=Mus musculus GN=Cyp2e1 PE=1 SV=1	125	125	1	14	22	33	12	10	18	16	14	22	33	12	10	18	16	14	22	33	12	10	18	16	21.7271	16.8499	26.7143	21.4576	15.1333	15.0956	9.71429	18.0989	TRUE	TRUE	4	3	TRUE	21.6872	13.3144	0.703859	1.31023
828	1	UD2A3_MOUSE	UD2A3_MOUSE		29	534	61120	UDP-glucuronosyltransferase 2A3 OS=Mus musculus GN=Ugt2a3 PE=2 SV=1	135	129	0.956	11	27	32	9	7	19	30	11	26	31	8	7	17	29	11	26.299	31.233	8.131	7	17.324	29.2	17.8571	20.9611	25.9234	17.1616	11.392	14.459	18.604	18.0512	TRUE	TRUE	4	3	TRUE	20.4758	14.8183	0.466538	0.615143
1255	1	MET7B_MOUSE	MET7B_MOUSE		43.9	244	28050	Methyltransferase-like protein 7B OS=Mus musculus GN=Mettl7b PE=2 SV=2	126	126	1	7	25	21	12	9	18	34	7	25	21	12	9	18	34	7	25	21	12	9	18	34	12.8966	19.8479	17.1673	22.2857	14.2707	15.7101	22.874	17.8646	TRUE	TRUE	4	3	TRUE	18.0494	17.6183	0.0348739	-0.390416
1194	1	SEC13_MOUSE	SEC13_MOUSE		32	322	35567	Protein SEC13 homolog OS=Mus musculus GN=Sec13 PE=2 SV=3	120	120	1	13	21	18	6	17	16	29	13	21	18	6	17	16	29	13	21	18	6	17	16	29	21.1989	16.5047	14.3053	14.3053	24.5714	13.5571	18.5714	17.5734	TRUE	TRUE	4	3	TRUE	16.5785	18.9	-0.18907	-0.500599
670	1	RBM26_MOUSE	RBM26_MOUSE		18.5	1012	114144	RNA-binding protein 26 OS=Mus musculus GN=Rbm26 PE=1 SV=2	115	102	0.887	24	13	11	8	29	12	18	22	11	9	5	27	11	17	23.833	11.917	10	6.5	28.588	11.688	17.68	35.5753	8.66943	7.28571	14.8989	35.6831	9.24114	10.9543	17.4726	TRUE	TRUE	4	3	TRUE	16.6073	18.6262	-0.165513	-0.453493
916	1	VRK3_MOUSE	VRK3_MOUSE		35.5	453	50831	Serine/threonine-protein kinase VRK3 OS=Mus musculus GN=Vrk3 PE=2 SV=2	128	128	1	8	25	23	2	13	24	33	8	25	23	2	13	24	33	8	25	23	2	13	24	33	14	19.5654	19	7.02143	19.8479	21.2121	21.4576	17.4435	TRUE	TRUE	4	3	TRUE	14.8967	20.8392	-0.484305	-0.892391
1239	1	XRN2_MOUSE	XRN2_MOUSE		22.7	951	108688	5'-3' exoribonuclease 2 OS=Mus musculus GN=Xrn2 PE=1 SV=1	131	131	1	10	28	22	2	3	21	45	10	28	22	2	3	21	45	10	28	22	2	3	21	45	16.8499	22.874	18.0354	7.44086	6.75929	18.8763	31.267	17.4432	TRUE	TRUE	4	3	TRUE	16.3	18.9675	-0.218656	-0.408247
367	1	1433E_MOUSE	1433E_MOUSE		57.6	255	29175	14-3-3 protein epsilon OS=Mus musculus GN=Ywhae PE=1 SV=1	124	97	0.782	14	29	17	16	6	22	20	8	25	14	11	4	17	18	12.364	28.03	16	15.231	5	20.864	19.333	20.1949	23.2053	12.2619	25.9234	8.72243	18.4156	12.3333	17.2938	TRUE	TRUE	4	3	TRUE	20.3964	13.1571	0.63247	0.793274
191	1	RLA0_MOUSE	RLA0_MOUSE		33.8	317	34217	60S acidic ribosomal protein P0 OS=Mus musculus GN=Rplp0 PE=1 SV=3	111	111	1	19	14	12	12	23	14	17	19	14	12	12	23	14	17	19	14	12	12	23	14	17	27.9841	10.4286	8.42857	21.2559	31.267	10.8571	10.2857	17.2153	TRUE	TRUE	4	3	TRUE	17.0243	17.47	-0.0372814	-0.092966
305	1	DHB4_MOUSE	DHB4_MOUSE		33.7	735	79483	Peroxisomal multifunctional enzyme type 2 OS=Mus musculus GN=Hsd17b4 PE=1 SV=3	130	130	1	3	18	38	5	12	28	26	3	18	38	5	12	28	26	3	18	38	5	12	28	26	5.42857	13.8199	30.8417	11.5714	17.8571	24.3351	16.4286	17.1832	TRUE	TRUE	4	3	TRUE	15.4154	19.5403	-0.34208	-0.505792
217	1	H2A1_MOUSE	H2A1_MOUSE		37.7	130	14136	Histone H2A type 1 OS=Mus musculus GN=Hist1h2ab PE=1 SV=3	8045	6	0.001	1484	798	549	1144	2397	814	859	1	1	0	0	0	2	2	62.053	10.885	0	0	0	26.536	26.822	72.9667	7.555	0	0	0	22.7909	16.8317	17.1635	TRUE	FALSE	4	3	TRUE	20.1304	13.2075	0.608018	0.997917
87	1	IMA3_MOUSE	IMA3_MOUSE		22.5	521	57774	Importin subunit alpha-3 OS=Mus musculus GN=Kpna3 PE=1 SV=1	144	86	0.597	11	26	31	26	5	13	32	7	14	17	21	5	6	16	9.8	19.6	26.52	25.375	5	9.231	22.564	15.5629	15.1333	21.6271	37.3121	8.42857	7.60443	14.2234	17.1274	TRUE	TRUE	4	3	TRUE	22.4089	10.0855	1.15179	1.96418
1159	1	CA077_MOUSE	CA077_MOUSE		24.9	249	26586	Uncharacterized protein C1orf77 homolog OS=Mus musculus GN=MNCb-1706 PE=2 SV=2	114	114	1	12	28	19	16	6	16	17	12	28	19	16	6	16	17	12	28	19	16	6	16	17	19.6694	22.6866	15.2857	27.4149	10.4286	13.4867	10.8571	17.1184	TRUE	TRUE	4	3	TRUE	21.2641	11.5908	0.875441	1.61442
426	1	H31_MOUSE	H31_MOUSE		43.4	136	15405	Histone H3.1 OS=Mus musculus GN=Hist1h3a PE=1 SV=2	1283	31	0.024	222	171	119	225	223	207	116	0	4	3	0	0	11	13	0	24.875	18.818	0	0	53.275	50.194	0	19.2119	14.8534	0.142857	0	50.0393	35.5753	17.1175	TRUE	FALSE	4	3	TRUE	8.55204	28.5382	-1.73855	-2.57361
548	1	NPA1P_MOUSE	NPA1P_MOUSE		13.8	2274	254615	Nucleolar pre-ribosomal-associated protein 1 OS=Mus musculus GN=Urb1 PE=2 SV=2	126	126	1	4	17	29	5	17	24	30	4	17	29	5	17	24	30	4	17	29	5	17	24	30	7.28571	12.8571	23.0229	12.2296	24.3351	20.9611	19	17.0988	TRUE	TRUE	4	3	TRUE	13.8488	21.4321	-0.63001	-0.853609
864	1	NUP88_MOUSE	NUP88_MOUSE		20.7	753	84939	Nuclear pore complex protein Nup88 OS=Mus musculus GN=Nup88 PE=2 SV=1	114	114	1	13	15	16	6	14	29	21	13	15	16	6	14	29	21	13	15	16	6	14	29	21	20.9611	11.5714	12.3333	14	21.2559	25.4071	13.8129	17.0488	TRUE	TRUE	4	3	TRUE	14.7165	20.1586	-0.453966	-0.599114
331	1	EXOSX_MOUSE	EXOSX_MOUSE		17.9	887	100973	Exosome component 10 OS=Mus musculus GN=Exosc10 PE=1 SV=1	138	138	1	3	26	30	1	8	32	38	3	26	30	1	8	32	38	3	26	30	1	8	32	38	5.523	20.1949	24	3.60957	12.2857	27.4149	25.4071	16.9193	TRUE	TRUE	4	3	TRUE	13.3319	21.7026	-0.702988	-1.03919
967	1	DHB13_MOUSE	DHB13_MOUSE		28.6	304	33519	17-beta-hydroxysteroid dehydrogenase 13 OS=Mus musculus GN=Hsd17b13 PE=1 SV=1	117	97	0.829	16	20	25	6	5	24	21	16	16	22	6	5	17	15	16	19.2	24.64	6	5	24	20.294	25.1806	15.0286	20.3771	14	9.23814	21.2559	12.9196	16.8571	TRUE	TRUE	4	3	TRUE	18.6466	14.4712	0.365727	0.581371
420	1	CSK2B_MOUSE	CSK2B_MOUSE		33.5	215	24943	Casein kinase II subunit beta OS=Mus musculus GN=Csnk2b PE=1 SV=1	121	121	1	11	19	20	8	8	20	35	11	19	20	8	8	20	35	11	19	20	8	8	20	35	17.1673	14.3837	16.421	16.4286	12.3333	17.3941	23.4621	16.7986	TRUE	TRUE	4	3	TRUE	16.1001	17.7299	-0.139107	-0.203852
881	1	P66A_MOUSE	P66A_MOUSE		37.7	629	67335	Transcriptional repressor p66 alpha OS=Mus musculus GN=Gatad2a PE=1 SV=2	115	114	0.991	19	15	20	1	20	18	22	19	15	19	1	20	18	22	19	15	19.731	1	20	18	22	28.304	11.5714	15.815	4.57143	27.704	15.2857	14	16.7502	TRUE	TRUE	4	3	TRUE	15.0655	18.9966	-0.334494	-0.499777
390	1	RL23_MOUSE	RL23_MOUSE		43.6	140	14866	60S ribosomal protein L23 OS=Mus musculus GN=Rpl23 PE=2 SV=1	105	105	1	16	8	11	14	21	20	15	16	8	11	14	21	20	15	16	8	11	14	21	20	15	24.5714	5.40471	8	23.7143	29.3074	17.2497	9	16.7497	TRUE	TRUE	4	3	TRUE	15.4226	18.519	-0.263963	-0.431423
88	1	IMA7_MOUSE	IMA7_MOUSE		30.2	536	59965	Importin subunit alpha-7 OS=Mus musculus GN=Kpna6 PE=1 SV=2	257	35	0.136	22	44	50	18	26	48	49	2	6	8	2	4	6	7	8.667	17.4	29	6	13.778	20	24.294	14.3837	13.5571	22.7909	13.4301	20.5397	17.1616	15.3277	16.7416	TRUE	FALSE	4	3	TRUE	16.0405	17.6763	-0.140103	-0.186662
802	1	K0020_MOUSE	K0020_MOUSE		26.7	647	72801	Pumilio domain-containing protein KIAA0020 OS=Mus musculus GN=Kiaa0020 PE=2 SV=2	130	130	1	6	23	28	1	8	30	34	6	23	28	1	8	30	34	6	23	28	1	8	30	34	11.2756	17.8571	22.4286	4.28571	12.6607	26.1973	22.2857	16.713	TRUE	TRUE	4	3	TRUE	13.9618	20.3812	-0.545762	-0.775528
1234	1	RPN2_MOUSE	RPN2_MOUSE		28.4	631	69064	Dolichyl-diphosphooligosaccharide--protein glycosyltransferase subunit 2 OS=Mus musculus GN=Rpn2 PE=2 SV=1	113	113	1	17	20	23	5	11	11	26	17	20	23	5	11	11	26	17	20	23	5	11	11	26	26.7143	15.3277	19.2119	12.9196	17	9	16.5047	16.6683	TRUE	TRUE	4	3	TRUE	18.5434	14.1682	0.388242	0.989643
284	1	RLA1_MOUSE	RLA1_MOUSE		51.8	114	11476	60S acidic ribosomal protein P1 OS=Mus musculus GN=Rplp1 PE=1 SV=1	106	106	1	23	14	17	13	13	13	13	23	14	17	13	13	13	13	23	14	17	13	13	13	13	34.248	10.4286	12.6607	22.5714	19	10.1429	7.555	16.6581	TRUE	TRUE	4	3	TRUE	19.9772	12.2326	0.70762	1.84411
172	1	TCP4_MOUSE	TCP4_MOUSE		37	127	14428	Activated RNA polymerase II transcriptional coactivator p15 OS=Mus musculus GN=Sub1 PE=1 SV=3	110	110	1	8	12	14	22	15	16	23	8	12	14	22	15	16	23	8	12	14	22	15	16	23	13.4867	8.74286	10.092	34.6897	22.2857	12.8571	14.3053	16.6371	TRUE	TRUE	4	3	TRUE	16.7528	16.4827	0.0234503	0.199291
769	1	ACTBL_MOUSE	ACTBL_MOUSE		14.1	376	42005	Beta-actin-like protein 2 OS=Mus musculus GN=Actbl2 PE=1 SV=1	334	71	0.213	73	42	37	48	58	41	35	38	1	1	2	29	0	0	48	1.383	1.283	3.045	36.577	0	0	60.2079	0.626143	0.897571	9.72071	44.511	0	0	16.5662	TRUE	FALSE	4	3	TRUE	17.8631	14.837	0.267781	0.752065
101	1	LSM2_MOUSE	LSM2_MOUSE		47.4	95	10836	U6 snRNA-associated Sm-like protein LSm2 OS=Mus musculus GN=Lsm2 PE=2 SV=1	112	112	1	10	17	16	16	18	10	25	10	17	16	16	18	10	25	10	17	16	16	18	10	25	15.815	12.8571	11.916	26.4286	25.4286	7.877	15.5629	16.555	TRUE	TRUE	4	3	TRUE	16.7542	16.2895	0.0405807	0.151798
464	1	NFIB_MOUSE	NFIB_MOUSE		38.6	570	63508	Nuclear factor 1 B-type OS=Mus musculus GN=Nfib PE=1 SV=2	136	105	0.772	15	31	24	20	9	14	23	9	27	21	10	6	12	20	10.317	28.609	21.788	13.289	6.563	12.686	21.094	16.9024	23.5156	17.3941	23.0229	10.7029	10.092	13.8706	16.5001	TRUE	TRUE	4	3	TRUE	20.2088	11.5551	0.806445	2.28854
1247	1	PRP17_MOUSE	PRP17_MOUSE		39.6	579	65462	Pre-mRNA-processing factor 17 OS=Mus musculus GN=Cdc40 PE=1 SV=1	131	131	1	5	28	32	1	1	17	47	5	28	32	1	1	17	47	5	28	32	1	1	17	47	10.4286	23.0229	26.4286	5.28914	3.322	14.3513	32.4071	16.4642	TRUE	TRUE	4	3	TRUE	16.2923	16.6935	-0.0350954	-0.153709
118	1	SPT5H_MOUSE	SPT5H_MOUSE		29.6	1082	120665	Transcription elongation factor SPT5 OS=Mus musculus GN=Supt5h PE=1 SV=1	123	123	1	12	28	27	2	9	19	26	12	28	27	2	9	19	26	12	28	27	2	9	19	26	18.5714	22.4286	21.9411	5.85714	13.4486	16.4286	16.421	16.4423	TRUE	TRUE	4	3	TRUE	17.1996	15.4327	0.156381	0.168387
727	1	INT3_MOUSE	INT3_MOUSE		20.3	1041	117939	Integrator complex subunit 3 OS=Mus musculus GN=Ints3 PE=1 SV=2	122	122	1	10	23	25	2	12	16	34	10	23	25	2	12	16	34	10	23	25	2	12	16	34	16.4286	17.8571	20.6974	6.51943	18.4156	13.169	21.9796	16.4381	TRUE	TRUE	4	3	TRUE	15.3756	17.8547	-0.215658	-0.616429
363	1	PP1B_MOUSE	PP1B_MOUSE		48.6	327	37188	Serine/threonine-protein phosphatase PP1-beta catalytic subunit OS=Mus musculus GN=Ppp1cb PE=1 SV=3	512	28	0.055	35	90	79	46	49	119	94	1	2	10	1	4	2	8	4.091	9.333	37.6	6	14.588	11	36.667	8.72729	6.47614	30.0857	13.8199	21.9411	8.74286	24.4816	16.3249	TRUE	FALSE	4	3	TRUE	14.7773	18.3885	-0.315428	-0.858681
951	1	NOP14_MOUSE	NOP14_MOUSE		19.2	860	98775	Nucleolar protein 14 OS=Mus musculus GN=Nop14 PE=1 SV=1	105	105	1	16	6	11	5	21	20	26	16	6	11	5	21	20	26	16	6	11	5	21	20	26	24.9006	4.14286	8.00929	12.855	29.5714	17.8571	16.4286	16.2521	TRUE	TRUE	4	3	TRUE	12.4769	21.2857	-0.770623	-1.79094
199	1	HMGA1_MOUSE	HMGA1_MOUSE		48.6	107	11615	High mobility group protein HMG-I/HMG-Y OS=Mus musculus GN=Hmga1 PE=1 SV=4	107	107	1	10	16	15	14	21	14	17	10	16	15	14	21	14	17	10	16	15	14	21	14	17	16.0944	12.2857	11.2219	23.5407	28.7143	10.8571	10.2857	16.1428	TRUE	TRUE	4	3	TRUE	15.7857	16.619	-0.0742214	-0.36772
859	1	PRP31_MOUSE	PRP31_MOUSE		24.2	499	55403	U4/U6 small nuclear ribonucleoprotein Prp31 OS=Mus musculus GN=Prpf31 PE=2 SV=2	109	109	1	16	21	18	3	14	18	19	16	21	18	3	14	18	19	16	21	18	3	14	18	19	24.8297	16.4286	14	9.01343	21.2121	15.2857	11.8571	16.0895	TRUE	TRUE	4	3	TRUE	16.0679	16.1183	-0.00451862	-0.22004
1381	1	MBD2_MOUSE	MBD2_MOUSE		23.7	414	43544	Methyl-CpG-binding domain protein 2 OS=Mus musculus GN=Mbd2 PE=2 SV=1	109	109	1	11	17	18	9	7	21	26	11	17	18	9	7	21	26	11	17	18	9	7	21	26	18.2369	13.4867	14.459	18.5714	11.8571	19.1076	16.7143	16.0619	TRUE	TRUE	4	3	TRUE	16.1885	15.893	0.0265778	-0.149669
761	1	DDX42_MOUSE	DDX42_MOUSE		32.5	929	101966	ATP-dependent RNA helicase DDX42 OS=Mus musculus GN=Ddx42 PE=1 SV=3	127	127	1	1	37	24	1	7	24	33	1	37	24	1	7	24	33	1	37	24	1	7	24	33	2.36729	31.6137	19.8479	4.20886	11.2219	21.1989	21.2559	15.9592	TRUE	TRUE	4	3	TRUE	14.5094	17.8922	-0.302339	-0.781382
1219	1	EBP2_MOUSE	EBP2_MOUSE		37.3	306	34704	Probable rRNA-processing protein EBP2 OS=Mus musculus GN=Ebna1bp2 PE=2 SV=1	114	114	1	8	27	19	3	8	23	26	8	27	19	3	8	23	26	8	27	19	3	8	23	26	14	22	15.2857	9.71429	12.8571	20.553	16.4286	15.8341	TRUE	TRUE	4	3	TRUE	15.25	16.6129	-0.123495	-0.404498
577	1	PML_MOUSE	PML_MOUSE		27.8	885	98243	Probable transcription factor PML OS=Mus musculus GN=Pml PE=1 SV=3	108	108	1	6	41	18	18	3	11	11	6	41	18	18	3	11	11	6	41	18	18	3	11	11	11.2197	34.7143	13.8571	29.5617	5.85714	8.948	6.42857	15.7981	TRUE	TRUE	4	3	TRUE	22.3382	7.0779	1.65812	3.21414
1198	1	STAG1_MOUSE	STAG1_MOUSE		13.3	1258	144661	Cohesin subunit SA-1 OS=Mus musculus GN=Stag1 PE=1 SV=2	146	73	0.5	15	30	28	7	8	27	31	12	11	14	4	7	11	14	14.118	17.967	20.533	5.714	7.875	19	23.154	22.874	13.7659	16.5047	13.272	12.14	16.8499	15.0956	15.786	TRUE	TRUE	4	3	TRUE	16.6041	14.6951	0.176204	0.157026
573	1	KHDR1_MOUSE	KHDR1_MOUSE		23	443	48372	KH domain-containing, RNA-binding, signal transduction-associated protein 1 OS=Mus musculus GN=Khdrbs1 PE=1 SV=2	97	94	0.969	12	11	13	22	18	12	9	12	10	13	22	17	12	8	12	10.5	13	22	17.85	12	8.571	19	7.47957	9.41071	34.7143	25.4071	9.51886	4.79586	15.7609	TRUE	TRUE	4	3	TRUE	17.6511	13.2406	0.414791	0.547871
778	1	HTSF1_MOUSE	HTSF1_MOUSE		21.9	757	86241	HIV Tat-specific factor 1 homolog OS=Mus musculus GN=Htatsf1 PE=1 SV=1	110	110	1	11	24	23	7	9	16	20	11	24	23	7	9	16	20	11	24	23	7	9	16	20	17.8571	18.5	18.604	15.2494	14	13.272	12.6607	15.7348	TRUE	TRUE	4	3	TRUE	17.5526	13.3109	0.39908	0.395555
1337	1	YLPM1_MOUSE	YLPM1_MOUSE		15.9	1386	155132	YLP motif-containing protein 1 OS=Mus musculus GN=Ylpm1 PE=2 SV=1	116	116	1	4	24	23	2	3	25	35	4	24	23	2	3	25	35	4	24	23	2	3	25	35	8.59914	19	19.2857	7.57143	6.85714	22.4286	23.7143	15.3509	TRUE	TRUE	4	3	TRUE	13.6141	17.6667	-0.375931	-0.817649
844	1	CPSM_MOUSE	CPSM_MOUSE		18.8	1500	164619	Carbamoyl-phosphate synthase [ammonia], mitochondrial OS=Mus musculus GN=Cps1 PE=1 SV=2	103	103	1	17	22	12	2	12	22	16	17	22	12	2	12	22	16	17	22	12	2	12	22	16	26.4286	17.1616	8.78157	6.85714	18.5	19.6857	9.94643	15.3373	TRUE	TRUE	4	3	TRUE	14.8072	16.044	-0.115738	-0.564918
1187	1	PPIL1_MOUSE	PPIL1_MOUSE		29.5	166	18238	Peptidyl-prolyl cis-trans isomerase-like 1 OS=Mus musculus GN=Ppil1 PE=2 SV=1	101	101	1	11	17	19	14	7	17	16	11	17	19	14	7	17	16	11	17	19	14	7	17	16	18.0354	13.4301	15.2857	24.5714	11.5714	14.3053	10.1429	15.3346	TRUE	TRUE	4	3	TRUE	17.8307	12.0065	0.570543	0.4236
1023	1	TM205_MOUSE	TM205_MOUSE		13.8	189	21181	Transmembrane protein 205 OS=Mus musculus GN=Tmem205 PE=1 SV=1	98	98	1	11	14	14	11	13	19	16	11	14	14	11	13	19	16	11	14	14	11	13	19	16	17.8571	10.8571	10.8571	20.6974	20.1939	16.7143	10.1034	15.3258	TRUE	TRUE	4	3	TRUE	15.0672	15.6705	-0.0566407	-0.464804
586	1	REQU_MOUSE	REQU_MOUSE		45.8	391	44231	Zinc finger protein ubi-d4 OS=Mus musculus GN=Dpf2 PE=1 SV=1	106	90	0.849	11	21	18	5	13	16	22	10	17	15	5	12	14	17	11	21	18	5	13	16	22	17.7947	16.4286	13.8706	12.2857	19.2857	12.9664	14	15.2331	TRUE	TRUE	4	3	TRUE	15.0949	15.4174	-0.0304972	-0.373565
589	1	CTCF_MOUSE	CTCF_MOUSE		25.1	736	83746	Transcriptional repressor CTCF OS=Mus musculus GN=Ctcf PE=1 SV=2	123	123	1	3	33	22	2	1	18	44	3	33	22	2	1	18	44	3	33	22	2	1	18	44	5.85714	28.221	17.8571	6.42857	2.42857	15.1747	30.2827	15.1786	TRUE	TRUE	4	3	TRUE	14.591	15.962	-0.129566	-0.562549
632	1	EST31_MOUSE	EST31_MOUSE		16.5	571	63319	Liver carboxylesterase 31 OS=Mus musculus GN=Es31 PE=1 SV=2	124	39	0.315	1	8	40	4	19	27	25	0	0	15	2	6	7	9	0	0	40	4	17.143	24.5	25	0.428571	0	32.4071	10.8571	24.9006	21.4576	15.815	15.1237	TRUE	FALSE	4	3	TRUE	10.9232	20.7244	-0.923932	-1.65644
329	1	CP240_MOUSE	CP240_MOUSE		28.5	491	55781	Cytochrome P450 2C40 OS=Mus musculus GN=Cyp2c40 PE=2 SV=1	105	105	1	4	41	1	32	2	6	19	4	41	1	32	2	6	19	4	41	1	32	2	6	19	7.28571	34.7143	0.571429	42.6954	4.14286	4.57143	11.5714	15.0789	TRUE	TRUE	4	3	TRUE	21.3167	6.7619	1.65648	2.15253
159	1	ENPL_MOUSE	ENPL_MOUSE		27.9	802	92477	Endoplasmin OS=Mus musculus GN=Hsp90b1 PE=1 SV=2	111	94	0.847	7	17	22	10	10	15	30	5	16	21	5	6	13	28	6.667	16.889	21.875	8.571	10	14.625	29.867	12.14	12.6984	17.7947	17.3941	14.8534	11.6796	18.8763	15.0624	TRUE	TRUE	4	3	TRUE	15.0068	15.1364	-0.0124064	-0.326757
978	1	K1967_MOUSE	K1967_MOUSE		30.7	922	103003	Protein KIAA1967 homolog OS=Mus musculus PE=1 SV=2	99	99	1	16	31	18	6	8	8	12	16	31	18	6	8	8	12	16	31	18	6	8	8	12	25.4071	25.4286	14	14	12.855	6.46	7.28571	15.0623	TRUE	TRUE	4	3	TRUE	19.7089	8.8669	1.15235	1.41632
539	1	S27A5_MOUSE	S27A5_MOUSE		30.6	689	76204	Bile acyl-CoA synthetase OS=Mus musculus GN=Slc27a5 PE=2 SV=2	97	97	1	21	21	24	9	5	7	10	21	21	24	9	5	7	10	21	21	24	9	5	7	10	31.4	16.421	19.6857	17.8571	8.78571	5.42857	5.85714	15.0622	TRUE	TRUE	4	3	TRUE	21.341	6.69048	1.67344	2.1768
766	1	WDR82_MOUSE	WDR82_MOUSE		38.3	313	35080	WD repeat-containing protein 82 OS=Mus musculus GN=Wdr82 PE=1 SV=1	103	103	1	13	17	18	9	5	18	23	13	17	18	9	5	18	23	13	17	18	9	5	18	23	20.8571	12.9196	14	18.2369	9	15.2857	14.8989	15.0283	TRUE	TRUE	4	3	TRUE	16.5034	13.0615	0.337439	0.254532
816	1	TM209_MOUSE	TM209_MOUSE		39.6	561	62983	Transmembrane protein 209 OS=Mus musculus GN=Tmem209 PE=2 SV=1	107	107	1	9	20	18	3	10	25	22	9	20	18	3	10	25	22	9	20	18	3	10	25	22	15.2857	15.2857	14	9	15.2857	22	14	14.9796	TRUE	TRUE	4	3	TRUE	13.3929	17.0952	-0.352131	-0.715743
460	1	FMO3_MOUSE	FMO3_MOUSE		36.3	534	60517	Dimethylaniline monooxygenase [N-oxide-forming] 3 OS=Mus musculus GN=Fmo3 PE=1 SV=1	91	91	1	11	60	0	20	0	0	0	11	60	0	20	0	0	0	11	60	0	20	0	0	0	17.2497	54.8413	0	32.1429	0	0	0	14.8906	TRUE	TRUE	3	0	TRUE	26.0585	0		-0.208348
847	1	TBL3_MOUSE	TBL3_MOUSE		30.5	801	88267	Transducin beta-like protein 3 OS=Mus musculus GN=Tbl3 PE=2 SV=1	107	107	1	12	10	19	2	11	19	34	12	10	19	2	11	19	34	12	10	19	2	11	19	34	19.4623	7.28571	15.1747	6.85714	16.5047	16.4286	22.4286	14.8774	TRUE	TRUE	4	3	TRUE	12.195	18.454	-0.597644	-1.09389
336	1	GGLO_MOUSE	GGLO_MOUSE		19.1	440	50493	L-gulonolactone oxidase OS=Mus musculus GN=Gulo PE=1 SV=2	113	113	1	4	23	34	6	4	17	25	4	23	34	6	4	17	25	4	23	34	6	4	17	25	7.28571	17.8571	28	13.8129	7.28571	13.8571	15.7101	14.8298	TRUE	TRUE	4	3	TRUE	16.7389	12.2843	0.446388	0.400938
365	1	RS8_MOUSE	RS8_MOUSE		36.1	208	24206	40S ribosomal protein S8 OS=Mus musculus GN=Rps8 PE=1 SV=2	109	109	1	2	26	23	9	6	25	18	2	26	23	9	6	25	18	2	26	23	9	6	25	18	3.90443	20.3771	18.5	17.8571	9.71429	21.9411	11.1547	14.7784	TRUE	TRUE	4	3	TRUE	15.1597	14.27	0.087249	-0.106162
603	1	ATRX_MOUSE	ATRX_MOUSE		9.7	2476	278605	Transcriptional regulator ATRX OS=Mus musculus GN=Atrx PE=1 SV=2	103	103	1	9	20	18	3	13	22	18	9	20	18	3	13	22	18	9	20	18	3	13	22	18	15.1333	15.2857	14	8.78157	19.4623	19.5654	11.173	14.7716	TRUE	TRUE	4	3	TRUE	13.3001	16.7336	-0.331304	-0.77538
544	1	SRRM1_MOUSE	SRRM1_MOUSE		15.9	946	106893	Serine/arginine repetitive matrix protein 1 OS=Mus musculus GN=Srrm1 PE=1 SV=1	99	99	1	13	11	17	14	9	12	23	13	11	17	14	9	12	23	13	11	17	14	9	12	23	20.553	8	12.855	24	14	9.42857	14.5191	14.7651	TRUE	TRUE	4	3	TRUE	16.352	12.6492	0.370417	0.423469
315	1	CEBPZ_MOUSE	CEBPZ_MOUSE		20.2	1052	120263	CCAAT/enhancer-binding protein zeta OS=Mus musculus GN=Cebpz PE=2 SV=2	114	114	1	3	22	20	3	11	22	33	3	22	20	3	11	22	33	3	22	20	3	11	22	33	5.49557	16.8317	16.2494	8.05114	16.4286	19.2857	20.9611	14.7576	TRUE	TRUE	4	3	TRUE	11.657	18.8918	-0.696569	-1.45871
909	1	BRD3_MOUSE	BRD3_MOUSE		21.8	726	79763	Bromodomain-containing protein 3 OS=Mus musculus GN=Brd3 PE=1 SV=2	121	60	0.496	15	21	21	11	13	19	21	8	10	10	4	8	11	9	11.5	15.789	16.875	9.6	10.857	17.656	15.75	18.5	12.2296	12.5536	18.8763	16.2494	14.8534	9.65471	14.7024	TRUE	TRUE	4	3	TRUE	15.5399	13.5859	0.193868	0.0996959
537	1	PR38A_MOUSE	PR38A_MOUSE		20.5	312	37438	Pre-mRNA-splicing factor 38A OS=Mus musculus GN=Prpf38a PE=1 SV=1	107	107	1	8	22	18	6	9	15	29	8	22	18	6	9	15	29	8	22	18	6	9	15	29	13.8129	16.9024	13.8199	13.8571	14	12.2857	18.2369	14.7021	TRUE	TRUE	4	3	TRUE	14.5981	14.8409	-0.0237966	-0.0352058
892	1	CDC73_MOUSE	CDC73_MOUSE		37.1	531	60578	Parafibromin OS=Mus musculus GN=Cdc73 PE=2 SV=1	100	100	1	9	19	13	5	16	14	24	9	19	13	5	16	14	24	9	19	13	5	16	14	24	15.2857	14.716	9.71429	12.711	23.5407	11.2756	15.2857	14.647	TRUE	TRUE	4	3	TRUE	13.1067	16.7007	-0.349596	-0.659579
1316	1	LSM4_MOUSE	LSM4_MOUSE		31.4	137	15077	U6 snRNA-associated Sm-like protein LSm4 OS=Mus musculus GN=Lsm4 PE=2 SV=1	86	86	1	12	12	10	18	13	11	10	12	12	10	18	13	11	10	12	12	10	18	13	11	10	19.8479	9.28571	7.60443	30.0857	20.3771	9.01343	6.14286	14.6224	TRUE	TRUE	4	3	TRUE	16.7059	11.8445	0.496146	0.996194
1245	1	NVL_MOUSE	NVL_MOUSE		30.8	855	94477	Nuclear valosin-containing protein-like OS=Mus musculus GN=Nvl PE=2 SV=1	94	94	1	13	24	13	6	12	15	11	13	24	13	6	12	15	11	13	24	13	6	12	15	11	21.2121	19	9.73814	14.3837	18.604	12.6607	6.53186	14.5901	TRUE	TRUE	4	3	TRUE	16.0835	12.5989	0.352289	0.716893
1155	1	RL11_MOUSE	RL11_MOUSE		21.9	178	20253	60S ribosomal protein L11 OS=Mus musculus GN=Rpl11 PE=1 SV=4	89	89	1	12	10	12	12	19	10	14	12	10	12	12	19	10	14	12	10	12	12	19	10	14	19.5654	7.28571	9	22	26.7619	8.36629	8.78157	14.5373	TRUE	TRUE	4	3	TRUE	14.4628	14.6366	-0.0172322	-0.0883549
48	1	PPIG_MOUSE	PPIG_MOUSE		11.4	752	88326	Peptidyl-prolyl cis-trans isomerase G OS=Mus musculus GN=Ppig PE=1 SV=1	111	111	1	4	21	19	8	4	22	33	4	21	19	8	4	22	33	4	21	19	8	4	22	33	6.85714	16.0944	14.8989	16.0944	7.28571	19.2857	20.8571	14.4819	TRUE	TRUE	4	3	TRUE	13.4862	15.8095	-0.229308	-0.538605
1181	1	MRT4_MOUSE	MRT4_MOUSE		41.8	239	27547	mRNA turnover protein 4 homolog OS=Mus musculus GN=Mrto4 PE=2 SV=1	107	107	1	2	21	22	4	9	20	29	2	21	22	4	9	20	29	2	21	22	4	9	20	29	4.57143	16.4286	18	11.2219	14	18.0354	18.5409	14.3997	TRUE	TRUE	4	3	TRUE	12.5555	16.8588	-0.425183	-0.882349
386	1	RS6_MOUSE	RS6_MOUSE		22.9	249	28682	40S ribosomal protein S6 OS=Mus musculus GN=Rps6 PE=1 SV=1	96	96	1	11	17	15	14	10	15	14	11	17	15	14	10	15	14	11	17	15	14	10	15	14	17.1616	12.8571	11.2857	23.625	15.0286	12.14	8.42357	14.3602	TRUE	TRUE	4	3	TRUE	16.2324	11.864	0.452276	0.879397
93	1	STAG2_MOUSE	STAG2_MOUSE		24.3	1231	141344	Cohesin subunit SA-2 OS=Mus musculus GN=Stag2 PE=1 SV=2	140	67	0.479	8	38	30	6	2	27	29	5	19	16	3	1	11	12	5.882	31.033	23.467	4.286	1.125	19	19.846	10.5546	26.1973	19.4623	11.4447	3.73214	16.4286	12.4066	14.318	TRUE	TRUE	4	3	TRUE	16.9147	10.8558	0.639818	1.29847
238	1	PDIA3_MOUSE	PDIA3_MOUSE		33.7	505	56679	Protein disulfide-isomerase A3 OS=Mus musculus GN=Pdia3 PE=1 SV=2	110	110	1	3	30	31	6	3	14	23	3	30	31	6	3	14	23	3	30	31	6	3	14	23	5.42857	24.5714	25.1806	13.4867	5.49557	10.9543	14.3513	14.2098	TRUE	TRUE	4	3	TRUE	17.1668	10.267	0.741602	1.52133
562	1	UTP20_MOUSE	UTP20_MOUSE		13.8	2788	317745	Small subunit processome component 20 homolog OS=Mus musculus GN=Utp20 PE=2 SV=2	102	102	1	8	7	15	2	17	21	32	8	7	15	2	17	21	32	8	7	15	2	17	21	32	13.8199	4.57143	11.5714	6.33329	24.3661	18.5	20.1949	14.1939	TRUE	TRUE	4	3	TRUE	9.074	21.0203	-1.21197	-2.01871
868	1	AQR_MOUSE	AQR_MOUSE		17.6	1481	170295	Intron-binding protein aquarius OS=Mus musculus GN=Aqr PE=2 SV=2	103	103	1	7	18	23	5	3	19	28	7	18	23	5	3	19	28	7	18	23	5	3	19	28	12.711	14	18.8763	12.6984	6.16471	16.5047	17.8571	14.116	TRUE	TRUE	4	3	TRUE	14.5714	13.5089	0.109237	0.201491
656	1	PDS5A_MOUSE	PDS5A_MOUSE		24.7	1332	150329	Sister chromatid cohesion protein PDS5 homolog A OS=Mus musculus GN=Pds5a PE=2 SV=2	122	91	0.746	9	20	27	5	11	22	28	9	16	21	3	9	15	18	9	16.985	22.658	3.353	9.643	17.019	20.5	15.2494	12.855	18.2369	9.79914	14.716	14.3837	12.9664	14.0295	TRUE	TRUE	4	3	TRUE	14.0351	14.022	0.00134304	0.116454
395	1	RL30_MOUSE	RL30_MOUSE		40.9	115	12785	60S ribosomal protein L30 OS=Mus musculus GN=Rpl30 PE=2 SV=2	85	85	1	13	7	9	15	15	10	16	13	7	9	15	15	10	16	13	7	9	15	15	10	16	20.4286	4.42443	6.42857	25.4071	22.4286	8	9.71429	13.8331	TRUE	TRUE	4	3	TRUE	14.1722	13.381	0.0828807	0.298369
409	1	CRNL1_MOUSE	CRNL1_MOUSE		16.7	690	83417	Crooked neck-like protein 1 OS=Mus musculus GN=Crnkl1 PE=2 SV=1	97	97	1	9	20	15	4	12	18	19	9	20	15	4	12	18	19	9	20	15	4	12	18	19	15	15.2857	11.392	10.5546	17.8571	15.0286	11.5714	13.8128	TRUE	TRUE	4	3	TRUE	13.0581	14.819	-0.182511	-0.0284533
483	1	ATPA_MOUSE	ATPA_MOUSE		21.9	553	59754	ATP synthase subunit alpha, mitochondrial OS=Mus musculus GN=Atp5a1 PE=1 SV=1	81	81	1	18	12	7	10	14	9	11	18	12	7	10	14	9	11	18	12	7	10	14	9	11	26.8571	9	4.89614	19.5419	20.8571	7.28571	6.42857	13.5524	TRUE	TRUE	4	3	TRUE	15.0738	11.5238	0.387424	0.806209
1352	1	MD1L1_MOUSE	MD1L1_MOUSE		29.8	717	83542	Mitotic spindle assembly checkpoint protein MAD1 OS=Mus musculus GN=Mad1l1 PE=2 SV=1	92	92	1	7	22	14	1	14	19	15	7	22	14	1	14	19	15	7	22	14	1	14	19	15	12.9664	17.2497	10.9543	5.42857	21.6271	17	9.41071	13.5196	TRUE	TRUE	4	3	TRUE	11.6498	16.0126	-0.45891	-0.443965
1060	1	SF3B5_MOUSE	SF3B5_MOUSE		45.3	86	10120	Splicing factor 3B subunit 5 OS=Mus musculus GN=Sf3b5 PE=2 SV=1	78	78	1	14	9	8	15	14	8	10	14	9	8	15	14	8	10	14	9	8	15	14	8	10	22.5714	6.42857	6.06457	25.5714	21.4576	6.53186	6	13.5179	TRUE	TRUE	4	3	TRUE	15.159	11.3298	0.420051	0.765553
1326	1	DNJA2_MOUSE	DNJA2_MOUSE		35.9	412	45747	DnaJ homolog subfamily A member 2 OS=Mus musculus GN=Dnaja2 PE=1 SV=1	96	96	1	6	20	18	7	4	14	27	6	20	18	7	4	14	27	6	20	18	7	4	14	27	11.8571	15.5629	14.3837	15.3277	8.00929	11.5714	17.3941	13.4438	TRUE	TRUE	4	3	TRUE	14.2829	12.325	0.212703	0.493558
561	1	THOC6_MOUSE	THOC6_MOUSE		24.9	341	37316	THO complex subunit 6 homolog OS=Mus musculus GN=Thoc6 PE=2 SV=1	92	92	1	12	17	12	7	7	17	20	12	17	12	7	7	17	20	12	17	12	7	7	17	20	19	12.8966	8.71429	15.1747	11.1547	14	12.5239	13.352	TRUE	TRUE	4	3	TRUE	13.9464	12.5595	0.15111	0.409797
1015	1	CP4CA_MOUSE	CP4CA_MOUSE		33.1	508	58332	Cytochrome P450 4A12A OS=Mus musculus GN=Cyp4a12a PE=2 SV=1	104	81	0.779	0	2	30	0	16	21	35	0	0	23	0	12	17	29	0	0	30	0	16	21	35	1	0	24.5714	1.42857	23.7143	18.5409	23.625	13.2686	TRUE	TRUE	2	3	TRUE	6.75	21.96	-1.70192	-2.2459
1175	1	SFRS9_MOUSE	SFRS9_MOUSE		38.3	222	25662	Splicing factor, arginine/serine-rich 9 OS=Mus musculus GN=Sfrs9 PE=1 SV=1	87	87	1	15	14	13	5	5	15	20	15	14	13	5	5	15	20	15	14	13	5	5	15	20	24	11	9.73657	12.8966	9.28571	12.5239	12.8571	13.1857	TRUE	TRUE	4	3	TRUE	14.4083	11.5556	0.31831	0.733337
210	1	CP2A5_MOUSE	CP2A5_MOUSE		50.6	494	56742	Cytochrome P450 2A5 OS=Mus musculus GN=Cyp2a5 PE=2 SV=1	275	27	0.098	25	56	18	27	21	45	83	0	5	2	0	0	6	14	0	24.753	7.611	0	0	31.167	55.408	0	19.1076	5.57086	0	0	27.234	39.7726	13.0979	TRUE	FALSE	4	3	TRUE	6.16961	22.3355	-1.85609	-2.70304
779	1	MAK16_MOUSE	MAK16_MOUSE		20.3	296	35186	Protein MAK16 homolog OS=Mus musculus GN=Mak16 PE=2 SV=1	94	94	1	4	15	15	6	10	17	27	4	15	15	6	10	17	27	4	15	15	6	10	17	27	7.60443	11.5714	11.5714	14	15.2857	14	17.1616	13.0278	TRUE	TRUE	4	3	TRUE	11.1868	15.4824	-0.468832	-0.462025
1017	1	U3IP2_MOUSE	U3IP2_MOUSE		34.9	475	52108	U3 small nucleolar RNA-interacting protein 2 OS=Mus musculus GN=Rrp9 PE=1 SV=1	91	91	1	3	16	18	5	9	20	20	3	16	18	5	9	20	20	3	16	18	5	9	20	20	6.33329	12.4066	14.2234	12.8571	14	17.8571	12.8571	12.9335	TRUE	TRUE	4	3	TRUE	11.4551	14.9048	-0.379782	-0.324657
324	1	ATPB_MOUSE	ATPB_MOUSE		27.6	529	56301	ATP synthase subunit beta, mitochondrial OS=Mus musculus GN=Atp5b PE=1 SV=2	87	87	1	7	9	13	10	12	15	21	7	9	13	10	12	15	21	7	9	13	10	12	15	21	12.2857	6.04757	9.28571	19.2857	17.8571	11.9701	13.4486	12.8829	TRUE	TRUE	4	3	TRUE	11.7262	14.4253	-0.298867	-0.236214
382	1	RS4X_MOUSE	RS4X_MOUSE		28.5	263	29599	40S ribosomal protein S4, X isoform OS=Mus musculus GN=Rps4x PE=2 SV=2	87	87	1	7	15	19	11	9	9	17	7	15	19	11	9	9	17	7	15	19	11	9	9	17	12.2857	11.4447	15	19.8713	13.8199	7.28571	10.4286	12.8766	TRUE	TRUE	4	3	TRUE	14.6504	10.5114	0.478991	1.03841
1146	1	NUP37_MOUSE	NUP37_MOUSE		28.5	326	36727	Nucleoporin Nup37 OS=Mus musculus GN=Nup37 PE=2 SV=1	101	101	1	2	24	24	2	3	17	29	2	24	24	2	3	17	29	2	24	24	2	3	17	29	4.57143	18.8763	20.1939	7.28571	6.43371	14.2707	18.5	12.876	TRUE	TRUE	4	3	TRUE	12.7318	13.0681	-0.0376153	0.238308
185	1	RL7_MOUSE	RL7_MOUSE		37	270	31421	60S ribosomal protein L7 OS=Mus musculus GN=Rpl7 PE=2 SV=2	95	95	1	3	26	14	10	7	14	21	3	26	14	10	7	14	21	3	26	14	10	7	14	21	5.39986	20.1939	10.1429	19	10.8221	10.8571	13.272	12.8126	TRUE	TRUE	4	3	TRUE	13.6841	11.6504	0.232122	0.722306
926	1	SF3B4_MOUSE	SF3B4_MOUSE		16.5	424	44357	Splicing factor 3B subunit 4 OS=Mus musculus GN=Sf3b4 PE=2 SV=1	76	76	1	10	12	8	17	11	9	9	10	12	8	17	11	9	9	10	12	8	17	11	9	9	16.4286	9.12214	6	28.304	16.8499	7.31614	5.42857	12.7785	TRUE	TRUE	4	3	TRUE	14.9637	9.86486	0.601095	1.23744
1165	1	RRS1_MOUSE	RRS1_MOUSE		20.5	365	41553	Ribosome biogenesis regulatory protein homolog OS=Mus musculus GN=Rrs1 PE=2 SV=1	101	101	1	1	27	22	0	3	29	19	1	27	22	0	3	29	19	1	27	22	0	3	29	19	2.85714	22	18	2.19043	6.44671	25.5714	12.2857	12.7645	TRUE	TRUE	3	3	TRUE	11.2619	14.768	-0.39102	-0.326185
1320	1	CPSF3_MOUSE	CPSF3_MOUSE		23	684	77530	Cleavage and polyadenylation specificity factor subunit 3 OS=Mus musculus GN=Cpsf3 PE=1 SV=1	95	95	1	1	12	30	3	4	21	24	1	12	30	3	4	21	24	1	12	30	3	4	21	24	3.14357	9.28571	24.8297	9.71429	8	19	15.2857	12.7513	TRUE	TRUE	4	3	TRUE	11.7433	14.0952	-0.263367	-0.24847
1149	1	DDX47_MOUSE	DDX47_MOUSE		39.1	455	50640	Probable ATP-dependent RNA helicase DDX47 OS=Mus musculus GN=Ddx47 PE=2 SV=2	84	84	1	6	11	16	8	10	16	17	6	11	16	8	10	16	17	6	11	16	8	10	16	17	11.5714	8.24914	12.4286	16.9591	15.7101	13.4486	10.8571	12.7463	TRUE	TRUE	4	3	TRUE	12.3021	13.3386	-0.116708	0.155836
706	1	NU188_MOUSE	NU188_MOUSE		17.7	1759	196697	Nucleoporin NUP188 homolog OS=Mus musculus GN=Nup188 PE=1 SV=2	105	105	1	3	26	20	0	4	17	35	3	26	20	0	4	17	35	3	26	20	0	4	17	35	5.92857	20.553	16.4286	0.857143	7.34743	14	23.5156	12.6615	TRUE	TRUE	3	3	TRUE	10.9418	14.9543	-0.450711	-0.544685
836	1	CQ085_MOUSE	CQ085_MOUSE		26.8	615	70044	Uncharacterized protein C17orf85 homolog OS=Mus musculus PE=1 SV=1	82	82	1	12	10	17	5	11	12	15	12	10	17	5	11	12	15	12	10	17	5	11	12	15	19.2857	7.28571	12.8571	12.4286	16.4286	9.71429	9.12214	12.446	TRUE	TRUE	4	3	TRUE	12.9643	11.755	0.141268	0.450965
527	1	HDGR2_MOUSE	HDGR2_MOUSE		24.8	669	74292	Hepatoma-derived growth factor-related protein 2 OS=Mus musculus GN=Hdgfrp2 PE=1 SV=1	81	77	0.951	17	7	17	5	13	7	15	17	7	17	5	13	7	11	17	7	17	5	13	7	11.815	26.0924	4.57143	12.711	12.14	19.2857	5.42857	6.75929	12.4269	TRUE	TRUE	4	3	TRUE	13.8787	10.4912	0.403696	0.817502
86	1	IMA4_MOUSE	IMA4_MOUSE		22.3	521	57924	Importin subunit alpha-4 OS=Mus musculus GN=Kpna4 PE=2 SV=1	126	68	0.54	7	28	22	8	8	14	39	3	16	8	3	8	7	23	4.2	22.4	12.48	3.625	8	10.769	32.436	8.74286	17.3941	9.12214	9.94643	12.2296	8.66943	20.7766	12.4116	TRUE	TRUE	4	3	TRUE	11.3014	13.8919	-0.297739	-0.307976
1268	1	TFP11_MOUSE	TFP11_MOUSE		25.8	838	96306	Tuftelin-interacting protein 11 OS=Mus musculus GN=Tfip11 PE=1 SV=1	91	91	1	2	20	12	3	7	20	27	2	20	12	3	7	20	27	2	20	12	3	7	20	27	4.71071	15.4286	9	9.71429	11.6796	18.2369	17.2497	12.2885	TRUE	TRUE	4	3	TRUE	9.71339	15.722	-0.694742	-0.850402
1046	1	DDX27_MOUSE	DDX27_MOUSE		19.7	760	85912	Probable ATP-dependent RNA helicase DDX27 OS=Mus musculus GN=Ddx27 PE=1 SV=2	91	91	1	3	18	25	1	6	20	18	3	18	25	1	6	20	18	3	18	25	1	6	20	18	6.42857	14	20.8571	4.57143	10.2857	17.8571	11.2857	12.1837	TRUE	TRUE	4	3	TRUE	11.4643	13.1429	-0.197132	-0.135316
614	1	SSRD_MOUSE	SSRD_MOUSE		19.8	172	18938	Translocon-associated protein subunit delta OS=Mus musculus GN=Ssr4 PE=2 SV=1	79	79	1	8	12	14	14	8	7	16	8	12	14	14	8	7	16	8	12	14	14	8	7	16	13.8571	9	10.4286	24.1724	12.4286	5.523	9.71429	12.1606	TRUE	TRUE	4	3	TRUE	14.3645	9.22195	0.639367	1.1054
1024	1	WRIP1_MOUSE	WRIP1_MOUSE		27.3	660	71795	ATPase WRNIP1 OS=Mus musculus GN=Wrnip1 PE=1 SV=2	88	88	1	8	24	19	4	2	9	22	8	24	19	4	2	9	22	8	24	19	4	2	9	22	14	18.604	15.2857	11.1429	4.58929	7.5	14	12.1603	TRUE	TRUE	4	3	TRUE	14.7581	8.69643	0.763016	1.38704
701	1	NSMA3_MOUSE	NSMA3_MOUSE		25.2	823	93277	Sphingomyelin phosphodiesterase 4 OS=Mus musculus GN=Smpd4 PE=2 SV=2	96	96	1	4	18	18	1	5	18	32	4	18	18	1	5	18	32	4	18	18	1	5	18	32	7.5	14	14	4.14286	9	15.2494	20.3771	12.0385	TRUE	TRUE	4	3	TRUE	9.91071	14.8755	-0.58588	-0.714418
566	1	XRCC1_MOUSE	XRCC1_MOUSE		24.7	631	68972	DNA repair protein XRCC1 OS=Mus musculus GN=Xrcc1 PE=1 SV=2	90	90	1	3	8	5	2	12	22	38	3	8	5	2	12	22	38	3	8	5	2	12	22	38	5.85714	5.42857	3.556	6.42857	18	19.5419	25.4286	12.0344	TRUE	TRUE	4	3	TRUE	5.31757	20.9901	-1.98087	-2.79384
950	1	PP1R8_MOUSE	PP1R8_MOUSE		26.5	351	38529	Nuclear inhibitor of protein phosphatase 1 OS=Mus musculus GN=Ppp1r8 PE=1 SV=1	75	75	1	10	12	17	7	11	9	9	10	12	17	7	11	9	9	10	12	17	7	11	9	9	16.5047	9.19043	12.9196	15.2857	16.9024	7.44086	5.42857	11.9532	TRUE	TRUE	4	3	TRUE	13.4751	9.92395	0.44131	0.811522
676	1	ABCF1_MOUSE	ABCF1_MOUSE		20.5	837	94946	ATP-binding cassette sub-family F member 1 OS=Mus musculus GN=Abcf1 PE=1 SV=1	92	92	1	2	12	10	3	5	22	38	2	12	10	3	5	22	38	2	12	10	3	5	22	38	4.14286	9	7.28571	9	9	19.6694	25.5714	11.9528	TRUE	TRUE	4	3	TRUE	7.35714	18.0803	-1.2972	-1.75199
50	1	LAS1L_MOUSE	LAS1L_MOUSE		33.1	776	89415	Protein LAS1 homolog OS=Mus musculus GN=Las1l PE=2 SV=1	89	89	1	5	13	18	8	5	9	31	5	13	18	8	5	9	31	5	13	18	8	5	9	31	9	9.42857	13.7659	16.2494	8.42357	7.02143	19.5419	11.9187	TRUE	TRUE	4	3	TRUE	12.111	11.6623	0.0544632	0.267383
461	1	RPB3_MOUSE	RPB3_MOUSE		36	275	31312	DNA-directed RNA polymerase II subunit RPB3 OS=Mus musculus GN=Polr2c PE=2 SV=1	79	79	1	11	16	15	8	6	13	10	11	16	15	8	6	13	10	11	16	15	8	6	13	10	17.3941	12.2857	11.4447	16.4286	9.72071	10.2467	5.85714	11.9111	TRUE	TRUE	4	3	TRUE	14.3883	8.60819	0.741113	1.27636
572	1	CSK21_MOUSE	CSK21_MOUSE		22.5	391	45163	Casein kinase II subunit alpha OS=Mus musculus GN=Csnk2a1 PE=2 SV=1	94	86	0.915	4	13	23	3	3	17	31	4	11	23	3	3	17	25	4	12.833	23	3	3	17	30.769	7.31614	9.40471	18.5409	8.71429	5.85714	14	19.4623	11.8993	TRUE	TRUE	4	3	TRUE	10.994	13.1065	-0.253563	-0.199871
506	1	SMCA4_MOUSE	SMCA4_MOUSE		18.6	1613	181428	Transcription activator BRG1 OS=Mus musculus GN=Smarca4 PE=1 SV=1	117	61	0.521	7	27	28	4	4	24	23	7	14	12	3	4	12	9	7	19.515	18.194	3.167	4	18.261	13.065	12.3654	15.0956	14.5191	9.73814	7.28571	16.0944	8.00929	11.8725	TRUE	TRUE	4	3	TRUE	12.9296	10.4631	0.305358	0.582903
432	1	NFIX_MOUSE	NFIX_MOUSE		27.3	488	53395	Nuclear factor 1 X-type OS=Mus musculus GN=Nfix PE=1 SV=2	133	61	0.459	10	21	27	20	11	18	26	4	10	13	5	8	7	14	4.585	12.875	17.14	8.281	8.75	11.6	18.744	8.93114	9.41071	13.4486	17.2497	13.169	9.22857	11.392	11.8328	TRUE	TRUE	4	3	TRUE	12.26	11.2632	0.122348	0.328617
163	1	PDIA1_MOUSE	PDIA1_MOUSE		25	509	57145	Protein disulfide-isomerase OS=Mus musculus GN=P4hb PE=1 SV=1	81	81	1	5	13	14	7	12	16	14	5	13	14	7	12	16	14	5	13	14	7	12	16	14	9	9.71429	9.97614	15.0286	17.7947	12.855	8.19643	11.795	TRUE	TRUE	4	3	TRUE	10.9298	12.9487	-0.244548	-0.170243
602	1	CBX5_MOUSE	CBX5_MOUSE		32.5	191	22187	Chromobox protein homolog 5 OS=Mus musculus GN=Cbx5 PE=1 SV=1	84	74	0.881	10	14	14	11	5	12	18	10	11	13	11	5	12	12	10	11.805	13.241	11	5	12	13.358	16.4286	8.59914	9.79914	20.1949	8.93114	9.65471	8.05114	11.6655	TRUE	TRUE	4	3	TRUE	13.7554	8.879	0.631532	1.27046
107	1	SMCE1_MOUSE	SMCE1_MOUSE		28.5	411	46639	SWI/SNF-related matrix-associated actin-dependent regulator chromatin subfamily E member 1 OS=Mus musculus GN=Smarce1 PE=1 SV=1	76	76	1	9	8	14	8	13	11	13	9	8	14	8	13	11	13	9	8	14	8	13	11	13	14.716	5.17186	9.94643	16.421	19	8.71429	7.5	11.6385	TRUE	TRUE	4	3	TRUE	11.5638	11.7381	-0.0215801	0.280903
114	1	IF6_MOUSE	IF6_MOUSE		36.7	245	26512	Eukaryotic translation initiation factor 6 OS=Mus musculus GN=Eif6 PE=1 SV=2	91	91	1	3	12	16	4	7	6	43	3	12	16	4	7	6	43	3	12	16	4	7	6	43	5.33543	8.72729	11.9701	10.1429	10.7857	4.57143	29.3074	11.5486	TRUE	TRUE	4	3	TRUE	9.04393	14.8882	-0.719147	-1.09625
565	1	SIN3A_MOUSE	SIN3A_MOUSE		16.1	1282	146183	Paired amphipathic helix protein Sin3a OS=Mus musculus GN=Sin3a PE=1 SV=2	82	82	1	5	13	20	5	3	19	17	5	13	20	5	3	19	17	5	13	20	5	3	19	17	9.41071	9.73814	16.4286	12.2619	5.85714	16.4286	10.7029	11.5468	TRUE	TRUE	4	3	TRUE	11.9598	10.9962	0.121192	0.541031
869	1	RBM28_MOUSE	RBM28_MOUSE		18.3	750	84205	RNA-binding protein 28 OS=Mus musculus GN=Rbm28 PE=1 SV=3	86	86	1	3	18	15	1	8	22	19	3	18	15	1	8	22	19	3	18	15	1	8	22	19	6.21429	14	11.5714	4.46829	12.711	19.8479	11.916	11.5327	TRUE	TRUE	4	3	TRUE	9.0635	14.825	-0.709887	-1.24241
266	1	CHD1_MOUSE	CHD1_MOUSE		11.1	1711	196412	Chromodomain-helicase-DNA-binding protein 1 OS=Mus musculus GN=Chd1 PE=1 SV=2	93	84	0.903	4	21	24	3	1	19	21	2	17	23	3	1	18	20	3	20.238	23.793	3	1	18.947	20.741	5.42857	15.7101	19.5419	8.00929	2.28571	16.421	13.169	11.5094	TRUE	TRUE	4	3	TRUE	12.1725	10.6252	0.196126	0.721427
856	1	DIDO1_MOUSE	DIDO1_MOUSE		18	2256	247177	Death-inducer obliterator 1 OS=Mus musculus GN=Dido1 PE=1 SV=4	79	79	1	15	13	15	1	6	14	15	15	13	15	1	6	14	15	15	13	15	1	6	14	15	23.625	10.1429	11.5714	4.42443	10.1429	11.2197	9.145	11.4673	TRUE	TRUE	4	3	TRUE	12.4409	10.1692	0.290889	0.91922
1122	1	RU2B_MOUSE	RU2B_MOUSE		33.3	225	25324	U2 small nuclear ribonucleoprotein B'' OS=Mus musculus GN=Snrpb2 PE=2 SV=1	169	74	0.438	7	33	34	18	8	35	34	1	17	14	3	5	17	17	1.047	19.747	17.011	3.833	5.114	18.889	19.558	3.29243	15.1747	13.4301	9.97614	9.51886	16.2494	12.3654	11.4296	TRUE	TRUE	4	3	TRUE	10.4684	12.7112	-0.28007	-0.317835
1250	1	PK1IP_MOUSE	PK1IP_MOUSE		26.4	382	42117	p21-activated protein kinase-interacting protein 1 OS=Mus musculus GN=Pak1ip1 PE=2 SV=2	84	84	1	7	18	14	0	8	15	22	7	18	14	0	8	15	22	7	18	14	0	8	15	22	12.8571	14	10.8571	2.35714	12.8966	12.6984	14	11.3809	TRUE	TRUE	3	3	TRUE	10.0179	13.1983	-0.397782	-0.523056
684	1	INT6_MOUSE	INT6_MOUSE		27.9	883	99662	Integrator complex subunit 6 OS=Mus musculus GN=Ints6 PE=2 SV=1	89	89	1	5	27	12	2	2	15	26	5	27	12	2	2	15	26	5	27	12	2	2	15	26	9.65471	21.7271	8.72243	6.43614	4.26529	12.3333	16.4286	11.3668	TRUE	TRUE	4	3	TRUE	11.6351	11.009	0.0797948	0.56683
1032	1	SSF1_MOUSE	SSF1_MOUSE		29.4	470	52726	Suppressor of SWI4 1 homolog OS=Mus musculus GN=Ppan PE=2 SV=1	80	80	1	3	15	12	7	4	18	21	3	15	12	7	4	18	21	3	15	12	7	4	18	21	6.42857	11.5714	9	15.2857	7.898	15.4286	13.8571	11.3528	TRUE	TRUE	4	3	TRUE	10.5714	12.3946	-0.229538	-0.019839
309	1	IMA2_MOUSE	IMA2_MOUSE		25.9	529	57929	Importin subunit alpha-2 OS=Mus musculus GN=Kpna2 PE=1 SV=2	88	88	1	6	11	13	0	10	27	21	6	11	13	0	10	27	21	6	11	13	0	10	27	21	10.8571	7.70357	9.24114	0	14.9643	23.0229	13.4301	11.317	TRUE	TRUE	3	3	TRUE	6.95046	17.1391	-1.30211	-2.12585
435	1	TIAR_MOUSE	TIAR_MOUSE		18.9	392	43390	Nucleolysin TIAR OS=Mus musculus GN=Tial1 PE=2 SV=1	79	79	1	3	14	16	7	11	13	15	3	14	16	7	11	13	15	3	14	16	7	11	13	15	5.64871	10.5546	12.2857	15.1333	16.4286	10.1429	9	11.3134	TRUE	TRUE	4	3	TRUE	10.9056	11.8571	-0.120691	0.167361
882	1	GNL3_MOUSE	GNL3_MOUSE		45.2	538	60787	Guanine nucleotide-binding protein-like 3 OS=Mus musculus GN=Gnl3 PE=1 SV=2	78	78	1	4	9	18	4	12	12	19	4	9	18	4	12	12	19	4	9	18	4	12	12	19	7.70357	6.16471	14	10.8571	18.5409	9.71429	11.9701	11.2787	TRUE	TRUE	4	3	TRUE	9.68136	13.4084	-0.469859	-0.58707
335	1	GCFC_MOUSE	GCFC_MOUSE		21.4	917	104602	GC-rich sequence DNA-binding factor homolog OS=Mus musculus GN=Gcfc PE=1 SV=2	85	85	1	6	11	16	3	6	16	27	6	11	16	3	6	16	27	6	11	16	3	6	16	27	10.8571	7.898	12.2296	8.11257	9.71429	12.8571	16.9591	11.2326	TRUE	TRUE	4	3	TRUE	9.77432	13.1769	-0.430938	-0.321527
1232	1	PELP1_MOUSE	PELP1_MOUSE		16.1	1123	118070	Proline-, glutamic acid- and leucine-rich protein 1 OS=Mus musculus GN=Pelp1 PE=1 SV=2	80	80	1	1	16	19	3	9	15	17	1	16	19	3	9	15	17	1	16	19	3	9	15	17	2.85714	12.5239	15.3277	9.71429	14.2234	12.5536	10.8571	11.151	TRUE	TRUE	4	3	TRUE	10.1058	12.5447	-0.311903	-0.224925
1132	1	RL14_MOUSE	RL14_MOUSE		25.3	217	23565	60S ribosomal protein L14 OS=Mus musculus GN=Rpl14 PE=2 SV=3	71	71	1	11	15	13	6	6	5	15	11	15	13	6	6	5	15	11	15	13	6	6	5	15	18	11.8571	9.71429	14.2707	10.4286	4.22443	9.28571	11.1116	TRUE	TRUE	4	3	TRUE	13.4605	7.97957	0.754353	1.56138
1029	1	RPN1_MOUSE	RPN1_MOUSE		21.7	608	68529	Dolichyl-diphosphooligosaccharide--protein glycosyltransferase subunit 1 OS=Mus musculus GN=Rpn1 PE=2 SV=1	74	74	1	6	11	14	6	7	15	15	6	11	14	6	7	15	15	6	11	14	6	7	15	15	11.4447	8.11257	10.8571	14	11.5714	12.4286	9.24114	11.0937	TRUE	TRUE	4	3	TRUE	11.1036	11.0804	0.00302095	0.411013
376	1	LSM6_MOUSE	LSM6_MOUSE		43.8	80	9129	U6 snRNA-associated Sm-like protein LSm6 OS=Mus musculus GN=Lsm6 PE=2 SV=1	79	79	1	10	13	12	2	7	18	17	10	13	12	2	7	18	17	10	13	12	2	7	18	17	16.421	9.71429	8.59914	6.16471	10.9543	15	10.4286	11.0403	TRUE	TRUE	4	3	TRUE	10.2248	12.1276	-0.246226	0.0847869
490	1	IF2P_MOUSE	IF2P_MOUSE		11.2	1216	137617	Eukaryotic translation initiation factor 5B OS=Mus musculus GN=Eif5b PE=1 SV=2	77	77	1	5	12	12	5	6	20	17	5	12	12	5	6	20	17	5	12	12	5	6	20	17	9.28571	9	8.66943	11.916	9.74457	17.7947	10.535	10.9922	TRUE	TRUE	4	3	TRUE	9.71779	12.6914	-0.385155	-0.127765
940	1	CIR1A_MOUSE	CIR1A_MOUSE		17.8	686	76910	Cirhin OS=Mus musculus GN=Cirh1a PE=2 SV=3	77	77	1	1	10	12	4	13	17	20	1	10	12	4	13	17	20	1	10	12	4	13	17	20	2.85714	7.28571	8.78571	10.8571	19.8713	14	12.8571	10.9306	TRUE	TRUE	4	3	TRUE	7.44643	15.5761	-1.06472	-1.12996
812	1	RL24_MOUSE	RL24_MOUSE		25.5	157	17780	60S ribosomal protein L24 OS=Mus musculus GN=Rpl24 PE=2 SV=2	71	71	1	8	18	9	9	3	11	13	8	18	9	9	3	11	13	8	18	9	9	3	11	13	14	14	6.53186	18.4156	6.07143	9	7.91429	10.8476	TRUE	TRUE	4	3	TRUE	13.2369	7.6619	0.788786	1.60429
667	1	RPRD2_MOUSE	RPRD2_MOUSE		22.7	1469	156587	Regulation of nuclear pre-mRNA domain-containing protein 2 OS=Mus musculus GN=Rprd2 PE=1 SV=1	72	72	1	7	14	10	6	8	11	16	7	14	10	6	8	11	16	7	14	10	6	8	11	16	12.4286	10.7029	7.28571	13.8706	12.5239	9	9.72071	10.7903	TRUE	TRUE	4	3	TRUE	11.0719	10.4149	0.0882635	0.506887
738	1	RPAB1_MOUSE	RPAB1_MOUSE		28.1	210	24571	DNA-directed RNA polymerases I, II, and III subunit RPABC1 OS=Mus musculus GN=Polr2e PE=2 SV=1	68	68	1	7	12	12	5	12	11	9	7	12	12	5	12	11	9	7	12	12	5	12	11	9	12.5239	9	8.74286	12.3333	18.5	9	5.42857	10.7898	TRUE	TRUE	4	3	TRUE	10.65	10.9762	-0.043524	0.305067
811	1	AMPM1_MOUSE	AMPM1_MOUSE		41.5	386	43222	Methionine aminopeptidase 1 OS=Mus musculus GN=Metap1 PE=2 SV=1	90	90	1	2	8	18	0	3	27	32	2	8	18	0	3	27	32	2	8	18	0	3	27	32	4.14286	5.64871	14	1	6.06457	23.5156	20.5397	10.7016	TRUE	TRUE	3	3	TRUE	6.19789	16.7066	-1.43057	-1.9197
431	1	NFIC_MOUSE	NFIC_MOUSE		36.2	439	48769	Nuclear factor 1 C-type OS=Mus musculus GN=Nfic PE=1 SV=1	99	64	0.646	10	18	23	15	7	11	15	4	14	17	6	4	8	11	4.585	15.143	19.14	7.688	4.375	8.99	12.213	8.79786	11.9701	15.5629	15.815	8.19643	7.02	7.31614	10.6683	TRUE	TRUE	4	3	TRUE	13.0365	7.51086	0.795503	1.57405
958	1	NOL6_MOUSE	NOL6_MOUSE		15.1	1152	129229	Nucleolar protein 6 OS=Mus musculus GN=Nol6 PE=2 SV=2	88	88	1	1	9	19	0	7	15	37	1	9	19	0	7	15	37	1	9	19	0	7	15	37	2.85714	6.28571	15.2857	1.4	11.5714	12.3654	24.5714	10.6196	TRUE	TRUE	3	3	TRUE	6.45714	16.1694	-1.3243	-1.6946
780	1	SPF30_MOUSE	SPF30_MOUSE		38.2	238	26754	Survival of motor neuron-related-splicing factor 30 OS=Mus musculus GN=Smndc1 PE=2 SV=1	68	68	1	12	8	9	5	6	17	11	12	8	9	5	6	17	11	12	8	9	5	6	17	11	19.2119	5.555	6.47614	12.4066	10.1034	14	6.43371	10.5981	TRUE	TRUE	4	3	TRUE	10.9124	10.179	0.100365	0.524849
1112	1	NOP16_MOUSE	NOP16_MOUSE		51.1	178	21140	Nucleolar protein 16 OS=Mus musculus GN=Nop16 PE=2 SV=1	82	82	1	0	12	12	2	6	18	32	0	12	12	2	6	18	32	0	12	12	2	6	18	32	1.14286	9.22857	9	7.28571	10.3214	15.5629	20.553	10.4421	TRUE	TRUE	3	3	TRUE	6.66429	15.4791	-1.2158	-1.54318
1025	1	RBM5_MOUSE	RBM5_MOUSE		14.8	815	92312	RNA-binding protein 5 OS=Mus musculus GN=Rbm5 PE=1 SV=1	71	71	1	5	10	12	4	7	14	19	5	10	12	4	7	14	19	5	10	12	4	7	14	19	10.1034	7.28571	8.948	11.1547	11.5714	11.4447	12.2619	10.3957	TRUE	TRUE	4	3	TRUE	9.37296	11.7593	-0.327229	-0.15921
922	1	DDX54_MOUSE	DDX54_MOUSE		24	874	97749	ATP-dependent RNA helicase DDX54 OS=Mus musculus GN=Ddx54 PE=1 SV=1	81	81	1	3	19	17	1	3	17	21	3	19	17	1	3	17	21	3	19	17	1	3	17	21	6.28571	14.8534	12.8966	4.57143	6.21429	14	13.8199	10.3773	TRUE	TRUE	4	3	TRUE	9.65179	11.3447	-0.233152	-0.0617906
948	1	NUPL1_MOUSE	NUPL1_MOUSE		12.9	587	59446	Nucleoporin p58/p45 OS=Mus musculus GN=Nupl1 PE=1 SV=1	82	82	1	0	22	21	3	2	12	22	0	22	21	3	2	12	22	0	22	21	3	2	12	22	0.857143	17.1673	16.9591	9.145	4.57143	9.71429	14	10.3449	TRUE	TRUE	3	3	TRUE	11.0321	9.42857	0.226602	0.652271
898	1	FIBB_MOUSE	FIBB_MOUSE		25.6	481	54754	Fibrinogen beta chain OS=Mus musculus GN=Fgb PE=2 SV=1	65	65	1	3	17	6	8	11	14	6	3	17	6	8	11	14	6	3	17	6	8	11	14	6	6.23814	13.169	4.42443	16.8317	16.8317	11.2857	3.556	10.3338	TRUE	TRUE	4	3	TRUE	10.1658	10.5578	-0.0545837	0.312398
994	1	P66B_MOUSE	P66B_MOUSE		33.8	594	65412	Transcriptional repressor p66-beta OS=Mus musculus GN=Gatad2b PE=1 SV=1	64	63	0.984	14	9	8	1	12	13	7	14	9	7	1	12	13	7	14	9	7.269	1	12	13	7	22.4286	6.28571	5.49557	4.57143	18.5714	10.535	4.20414	10.2988	TRUE	TRUE	4	3	TRUE	9.69532	11.1035	-0.195657	0.0349183
360	1	TIM13_MOUSE	TIM13_MOUSE		61.1	95	10459	Mitochondrial import inner membrane translocase subunit Tim13 OS=Mus musculus GN=Timm13 PE=1 SV=1	75	75	1	2	19	13	7	5	17	12	2	19	13	7	5	17	12	2	19	13	7	5	17	12	3.88886	14.3053	9.28571	15.0956	8.71429	13.8706	6.92857	10.2984	TRUE	TRUE	4	3	TRUE	10.6439	9.83781	0.113612	0.553727
824	1	PWP2_MOUSE	PWP2_MOUSE		22.1	919	102911	Periodic tryptophan protein 2 homolog OS=Mus musculus GN=Pwp2 PE=1 SV=1	85	85	1	1	13	20	0	6	17	28	1	13	20	0	6	17	28	1	13	20	0	6	17	28	2.43871	10.092	16.4286	1	10.1429	14	17.8571	10.2799	TRUE	TRUE	3	3	TRUE	7.48982	14	-0.902424	-1.26407
1353	1	MAN1_MOUSE	MAN1_MOUSE		19.2	921	100308	Inner nuclear membrane protein Man1 OS=Mus musculus GN=Lemd3 PE=1 SV=2	65	65	1	7	15	10	4	5	15	9	7	15	10	4	5	15	9	7	15	10	4	5	15	9	13.169	11.916	7.64086	11.392	9.41071	12.711	5.70429	10.2777	TRUE	TRUE	4	3	TRUE	11.0295	9.27533	0.249892	0.710811
1281	1	CWC15_MOUSE	CWC15_MOUSE		28.4	229	26625	Protein CWC15 homolog OS=Mus musculus GN=Cwc15 PE=1 SV=1	61	61	1	13	10	10	2	11	8	7	13	10	10	2	11	8	7	13	10	10	2	11	8	7	21.2559	7.28571	7.57143	7.5	17.1673	6.83329	4.28571	10.2713	TRUE	TRUE	4	3	TRUE	10.9032	9.42876	0.209618	0.612561
1280	1	EXOS9_MOUSE	EXOS9_MOUSE		14.6	438	48938	Exosome complex exonuclease RRP45 OS=Mus musculus GN=Exosc9 PE=2 SV=1	63	63	1	8	9	9	3	11	14	9	8	9	9	3	11	14	9	8	9	9	3	11	14	9	14.2234	6.42857	6.85714	9.71429	17.1616	11.5714	5.64871	10.2293	TRUE	TRUE	4	3	TRUE	9.30586	11.4606	-0.300468	-0.33681
1101	1	WBS14_MOUSE	WBS14_MOUSE		25.3	864	94876	Williams-Beuren syndrome chromosomal region 14 protein homolog OS=Mus musculus GN=Mlxipl PE=1 SV=1	66	66	1	10	13	6	4	5	10	18	10	13	6	4	5	10	18	10	13	6	4	5	10	18	16.7143	10.2467	4.57143	11.2197	9.24114	8.24914	11.2857	10.2183	TRUE	TRUE	4	3	TRUE	10.688	9.592	0.156093	0.357643
1136	1	RRP44_MOUSE	RRP44_MOUSE		22	958	108839	Exosome complex exonuclease RRP44 OS=Mus musculus GN=Dis3 PE=2 SV=4	78	78	1	3	21	18	2	1	14	19	3	21	18	2	1	14	19	3	21	18	2	1	14	19	6.43614	16.4286	14.2707	7.28571	3.14357	11.5714	12.2857	10.2031	TRUE	TRUE	4	3	TRUE	11.1053	9.00024	0.303211	0.357166
677	1	RRP12_MOUSE	RRP12_MOUSE		24	1295	143132	RRP12-like protein OS=Mus musculus GN=Rrp12 PE=1 SV=1	71	71	1	4	7	14	1	13	20	12	4	7	14	1	13	20	12	4	7	14	1	13	20	12	7.44086	4.57143	10.535	4.14286	19.5419	17.8571	7.28571	10.1964	TRUE	TRUE	4	3	TRUE	6.67254	14.8949	-1.15851	-1.94745
943	1	SEH1_MOUSE	SEH1_MOUSE		24.4	360	39776	Nucleoporin SEH1 OS=Mus musculus GN=Seh1l PE=2 SV=1	78	78	1	1	12	21	3	4	9	28	1	12	21	3	4	9	28	1	12	21	3	4	9	28	2.85714	9.145	16.9024	9.12214	7.70357	7.34743	17.8571	10.1336	TRUE	TRUE	4	3	TRUE	9.50668	10.9694	-0.206469	-0.481972
127	1	RDH7_MOUSE	RDH7_MOUSE		28.2	316	35661	Retinol dehydrogenase 7 OS=Mus musculus GN=Rdh7 PE=2 SV=1	84	30	0.357	8	28	15	5	4	13	11	2	11	6	2	1	5	3	5	22.688	15	4	4	11.667	11	9	17.7947	11.1547	10.1429	7.28571	9.23814	6.28571	10.1288	TRUE	TRUE	4	3	TRUE	12.0231	7.60319	0.661129	0.83303
1334	1	ZRAB2_MOUSE	ZRAB2_MOUSE		26.1	330	37351	Zinc finger Ran-binding domain-containing protein 2 OS=Mus musculus GN=Zranb2 PE=1 SV=2	75	75	1	2	11	19	1	4	18	20	2	11	19	1	4	18	20	2	11	19	1	4	18	20	4.79586	8.42357	15.4286	5.39986	8.05114	15.815	12.8571	10.1102	TRUE	TRUE	4	3	TRUE	8.51196	12.2411	-0.524169	-0.892167
186	1	RSSA_MOUSE	RSSA_MOUSE		29.5	295	32839	40S ribosomal protein SA OS=Mus musculus GN=Rpsa PE=1 SV=4	72	72	1	11	13	15	2	6	14	11	11	13	15	2	6	14	11	11	13	15	2	6	14	11	17	9.71429	11.2197	5.90471	9.71429	10.8571	6.29386	10.1006	TRUE	TRUE	4	3	TRUE	10.9597	8.9551	0.291425	0.341869
472	1	CREB1_MOUSE	CREB1_MOUSE		15.2	341	36675	Cyclic AMP-responsive element-binding protein 1 OS=Mus musculus GN=Creb1 PE=1 SV=1	56	46	0.821	15	6	4	11	11	5	4	13	4	3	9	8	5	4	14.529	5.143	3.6	10.8	10.4	5	4	23.0229	3.322	2.37143	19.6857	16.0944	3.90443	2.28571	10.0981	TRUE	TRUE	4	3	TRUE	12.1005	7.42819	0.703984	0.845021
433	1	SURF6_MOUSE	SURF6_MOUSE		24.2	355	41236	Surfeit locus protein 6 OS=Mus musculus GN=Surf6 PE=2 SV=1	70	70	1	4	19	8	4	9	11	15	4	19	8	4	9	11	15	4	19	8	4	9	11	15	7.28571	14.459	5.85714	10.6379	13.8706	8.78571	9	9.98514	TRUE	TRUE	4	3	TRUE	9.55993	10.5521	-0.142458	-0.368751
296	1	PCY1A_MOUSE	PCY1A_MOUSE		37.9	367	41668	Choline-phosphate cytidylyltransferase A OS=Mus musculus GN=Pcyt1a PE=1 SV=1	69	69	1	5	12	9	5	10	6	22	5	12	9	5	10	6	22	5	12	9	5	10	6	22	9.145	8.78571	6.42857	11.5714	14.8989	4.57143	14	9.91443	TRUE	TRUE	4	3	TRUE	8.98268	11.1568	-0.312701	-0.634767
165	1	HMGN2_MOUSE	HMGN2_MOUSE		28.9	90	9424	Non-histone chromosomal protein HMG-17 OS=Mus musculus GN=Hmgn2 PE=1 SV=2	54	54	1	14	4	4	14	9	6	3	14	4	4	14	9	6	3	14	4	4	14	9	6	3	21.6271	2.23586	2.511	23.5156	13.4867	4.57143	1.42857	9.9109	TRUE	TRUE	4	3	TRUE	12.4724	6.49557	0.94121	1.10821
265	1	NCPR_MOUSE	NCPR_MOUSE		19.6	678	77045	NADPH--cytochrome P450 reductase OS=Mus musculus GN=Por PE=1 SV=2	67	67	1	9	22	18	5	3	6	4	9	22	18	5	3	6	4	9	22	18	5	3	6	4	14.8534	16.7143	13.8129	11.5714	5.523	4.57143	2.28571	9.90459	TRUE	TRUE	4	3	TRUE	14.238	4.12671	1.78668	2.18213
405	1	DNJA1_MOUSE	DNJA1_MOUSE		18.1	397	44869	DnaJ homolog subfamily A member 1 OS=Mus musculus GN=Dnaja1 PE=1 SV=1	75	75	1	1	19	13	4	6	15	17	1	19	13	4	6	15	17	1	19	13	4	6	15	17	2.21429	14.3513	9.40471	10.535	9.71429	12.2296	10.4286	9.83967	TRUE	TRUE	4	3	TRUE	9.12632	10.7908	-0.241698	-0.437219
760	1	TRRAP_MOUSE	TRRAP_MOUSE		15.6	2565	291558	Transformation/transcription domain-associated protein OS=Mus musculus GN=Trrap PE=1 SV=2	74	74	1	5	21	22	2	1	7	16	5	21	22	2	1	7	16	5	21	22	2	1	7	16	9.71429	16.4286	17.8571	6.57143	2.85714	5.64871	9.74457	9.83169	TRUE	TRUE	4	3	TRUE	12.6429	6.08348	1.05535	1.24555
79	1	NEP1_MOUSE	NEP1_MOUSE		37.7	244	26975	Probable ribosome biogenesis protein NEP1 OS=Mus musculus GN=Emg1 PE=1 SV=1	74	74	1	5	15	10	1	9	18	16	5	15	10	1	9	18	16	5	15	10	1	9	18	16	9	11.2857	7.19043	3.11729	13.272	14.9643	9.71429	9.792	TRUE	TRUE	4	3	TRUE	7.64836	12.6502	-0.725937	-1.23637
1279	1	GTF2I_MOUSE	GTF2I_MOUSE		21.6	998	112266	General transcription factor II-I OS=Mus musculus GN=Gtf2i PE=1 SV=3	66	66	1	6	10	7	6	2	12	23	6	10	7	6	2	12	23	6	10	7	6	2	12	23	11.5714	7.28571	5.42857	14.5191	4.89614	9.74457	15.0286	9.78202	TRUE	TRUE	4	3	TRUE	9.70121	9.88976	-0.0277705	-0.206331
555	1	UTP18_MOUSE	UTP18_MOUSE		26.3	552	61219	U3 small nucleolar RNA-associated protein 18 homolog OS=Mus musculus GN=Utp18 PE=1 SV=1	72	72	1	5	11	10	1	10	16	19	5	11	10	1	10	16	19	5	11	10	1	10	16	19	9.40471	8	7.28571	3.99629	15.1747	12.9196	11.5714	9.76463	TRUE	TRUE	4	3	TRUE	7.17168	13.2219	-0.882547	-1.41803
1276	1	BRD4_MOUSE	BRD4_MOUSE		13.1	1400	155924	Bromodomain-containing protein 4 OS=Mus musculus GN=Brd4 PE=1 SV=1	99	39	0.394	15	20	17	8	11	9	19	8	9	6	1	6	2	7	11.5	14.211	10.125	2.4	8.143	3.077	12.25	18.5	11.173	7.70357	7.91429	12.9196	2.511	7.34743	9.72412	TRUE	TRUE	4	3	TRUE	11.3227	7.59267	0.576541	0.678581
786	1	TBL1R_MOUSE	TBL1R_MOUSE		24.5	514	55662	F-box-like/WD repeat-containing protein TBL1XR1 OS=Mus musculus GN=Tbl1xr1 PE=2 SV=1	64	43	0.672	7	12	6	8	5	14	12	3	9	5	4	2	11	9	7	11.25	5.625	8	5	13.357	11.077	12.6984	8.46429	4.02429	16.4286	9	10.7029	6.652	9.71006	TRUE	TRUE	4	3	TRUE	10.4039	8.78495	0.244017	0.292272
183	1	RL27A_MOUSE	RL27A_MOUSE		22.3	148	16590	60S ribosomal protein L27a OS=Mus musculus GN=Rpl27a PE=2 SV=4	62	62	1	5	12	8	13	5	9	10	5	12	8	13	5	9	10	5	12	8	13	5	9	10	9.01343	8.78157	5.64871	22.4286	8.59914	7.28571	5.85714	9.65918	TRUE	TRUE	4	3	TRUE	11.4681	7.24733	0.662101	0.839246
1365	1	SNF5_MOUSE	SNF5_MOUSE		26.8	385	44142	SWI/SNF-related matrix-associated actin-dependent regulator of chromatin subfamily B member 1 OS=Mus musculus GN=Smarcb1 PE=1 SV=1	53	53	1	8	7	9	7	11	6	5	8	7	9	7	11	6	5	8	7	9	7	11	6	5	14.2707	4.85714	7.02143	15.5629	17.3941	5.02386	3	9.59002	TRUE	TRUE	4	3	TRUE	10.428	8.47267	0.299579	0.324656
1197	1	HYEP_MOUSE	HYEP_MOUSE		31.4	455	52577	Epoxide hydrolase 1 OS=Mus musculus GN=Ephx1 PE=1 SV=1	79	79	1	1	7	17	0	2	25	27	1	7	17	0	2	25	27	1	7	17	0	2	25	27	2.85714	4.71429	12.9664	2.28571	4.77686	22.2857	17.1673	9.57906	TRUE	TRUE	3	3	TRUE	5.70589	14.7433	-1.36953	-2.00515
837	1	SFR12_MOUSE	SFR12_MOUSE		18.4	494	56764	Splicing factor, arginine/serine-rich 12 OS=Mus musculus GN=Sfrs12 PE=2 SV=1	63	63	1	5	13	14	5	5	10	11	5	13	14	5	5	10	11	5	13	14	5	5	10	11	9.73814	10.1034	10.7029	12.5239	9.12214	8.11257	6.43614	9.53416	TRUE	TRUE	4	3	TRUE	10.7671	7.89029	0.448476	0.885795
1034	1	UIF_MOUSE	UIF_MOUSE		32.2	317	35888	UAP56-interacting factor OS=Mus musculus GN=Fyttd1 PE=1 SV=1	61	61	1	8	15	6	2	9	12	9	8	15	6	2	9	12	9	8	15	6	2	9	12	9	14	11.6796	4.57143	7.28571	14	9.72071	5.42857	9.52657	TRUE	TRUE	4	3	TRUE	9.38418	9.71643	-0.0501957	-0.0676842
763	1	MPP10_MOUSE	MPP10_MOUSE		15.6	681	78676	U3 small nucleolar ribonucleoprotein protein MPP10 OS=Mus musculus GN=Mphosph10 PE=1 SV=1	70	70	1	7	13	13	2	2	12	21	7	13	13	2	2	12	21	7	13	13	2	2	12	21	12.6607	9.94643	9.65471	6.652	4.28571	9.71429	13.5571	9.49586	TRUE	TRUE	4	3	TRUE	9.72846	9.18571	0.0828202	0.0902429
890	1	INT4_MOUSE	INT4_MOUSE		26.7	964	108194	Integrator complex subunit 4 OS=Mus musculus GN=Ints4 PE=2 SV=1	73	73	1	4	17	16	0	6	13	17	4	17	16	0	6	13	17	4	17	16	0	6	13	17	7.877	12.9664	12.3654	1.14286	10.1429	10.4286	10.8571	9.39718	TRUE	TRUE	3	3	TRUE	8.58793	10.4762	-0.286732	-0.476896
1028	1	RRP1B_MOUSE	RRP1B_MOUSE		24.7	724	80583	Ribosomal RNA processing protein 1 homolog B OS=Mus musculus GN=Rrp1b PE=2 SV=2	59	59	1	4	9	8	5	10	14	9	4	9	8	5	10	14	9	4	9	8	5	10	14	9	8	6.33329	6	12.8571	15.3277	11.5714	5.42857	9.35973	TRUE	TRUE	4	3	TRUE	8.29761	10.7759	-0.377042	-0.624266
678	1	SMHD1_MOUSE	SMHD1_MOUSE		13	2007	225649	Structural maintenance of chromosomes flexible hinge domain-containing protein 1 OS=Mus musculus GN=Smchd1 PE=2 SV=2	76	76	1	1	16	9	2	3	15	30	1	16	9	2	3	15	30	1	16	9	2	3	15	30	2.28571	12.3333	6.43614	6.43371	5.90471	12.2857	19.1076	9.25527	TRUE	TRUE	4	3	TRUE	6.87221	12.4327	-0.855289	-1.30171
1014	1	FUBP1_MOUSE	FUBP1_MOUSE		25.5	651	68541	Far upstream element-binding protein 1 OS=Mus musculus GN=Fubp1 PE=1 SV=1	66	57	0.864	2	12	8	10	10	11	13	2	9	7	9	9	11	10	2	9.127	7.026	9.028	9.072	11	10.153	4.47143	6.44671	5.43229	18.604	14.5191	9	6.16471	9.23404	TRUE	TRUE	4	3	TRUE	8.73861	9.89462	-0.179241	-0.465359
1209	1	RPB4_MOUSE	RPB4_MOUSE		34.5	142	16312	DNA-directed RNA polymerase II subunit RPB4 OS=Mus musculus GN=Polr2d PE=2 SV=2	51	51	1	6	5	8	9	11	4	8	6	5	8	9	11	4	8	6	5	8	9	11	4	8	11.5714	3.28571	6.16471	18.5409	16.9591	3.29043	4.71429	9.21808	TRUE	TRUE	4	3	TRUE	9.89068	8.32129	0.249263	0.103712
971	1	MYH9_MOUSE	MYH9_MOUSE		13.5	1960	226373	Myosin-9 OS=Mus musculus GN=Myh9 PE=1 SV=4	65	55	0.846	4	18	10	2	3	18	10	4	15	8	2	3	15	8	4	18	10	2	3	18	10	7.94286	14	7.44086	7.28571	6.29386	15.3277	5.98057	9.18165	TRUE	TRUE	4	3	TRUE	9.16736	9.20071	-0.00523999	-0.107705
421	1	RL22_MOUSE	RL22_MOUSE		50.8	128	14760	60S ribosomal protein L22 OS=Mus musculus GN=Rpl22 PE=2 SV=2	53	53	1	13	4	9	5	10	6	6	13	4	9	5	10	6	6	13	4	9	5	10	6	6	20.5397	2.28571	6.42857	11.8571	15.0956	4.57143	3.29914	9.1539	TRUE	TRUE	4	3	TRUE	10.2778	7.65538	0.424983	0.435182
783	1	WDR3_MOUSE	WDR3_MOUSE		27.9	942	105776	WD repeat-containing protein 3 OS=Mus musculus GN=Wdr3 PE=2 SV=1	74	74	1	5	13	9	0	4	9	34	5	13	9	0	4	9	34	5	13	9	0	4	9	34	9.71429	9.97614	6.51943	0.877571	7.5	7.28571	22	9.12473	TRUE	TRUE	3	3	TRUE	6.77186	12.2619	-0.85656	-1.08156
861	1	H2AW_MOUSE	H2AW_MOUSE		40.6	372	40093	Core histone macro-H2A.2 OS=Mus musculus GN=H2afy2 PE=1 SV=3	258	54	0.209	40	48	38	38	24	36	34	12	16	10	3	2	4	7	12.357	16.977	10.889	3.156	2.058	4.305	7.521	20.1939	12.711	7.877	9.73657	5.294	3.615	4.42443	9.12169	TRUE	FALSE	4	3	TRUE	12.6296	4.44448	1.50672	1.67462
1238	1	AKAP8_MOUSE	AKAP8_MOUSE		30.6	687	76295	A-kinase anchor protein 8 OS=Mus musculus GN=Akap8 PE=1 SV=1	57	57	1	15	10	15	2	1	7	7	15	10	15	2	1	7	7	15	10	15	2	1	7	7	24	7.28571	11.5714	7.34743	3.29043	5.98057	4.28571	9.10876	TRUE	TRUE	4	3	TRUE	12.5511	4.5189	1.47377	1.64362
955	1	NUP85_MOUSE	NUP85_MOUSE		29.9	656	74777	Nuclear pore complex protein Nup85 OS=Mus musculus GN=Nup85 PE=1 SV=1	64	64	1	4	11	13	4	3	14	15	4	11	13	4	3	14	15	4	11	13	4	3	14	15	7.91429	8.05114	9.71429	10.9543	6.28571	11.392	9.23814	9.07855	TRUE	TRUE	4	3	TRUE	9.1585	8.97195	0.0296894	-0.0156552
232	1	DHE3_MOUSE	DHE3_MOUSE		31.4	558	61338	Glutamate dehydrogenase 1, mitochondrial OS=Mus musculus GN=Glud1 PE=1 SV=1	62	62	1	6	19	15	10	0	7	5	6	19	15	10	0	7	5	6	19	15	10	0	7	5	10.8221	14.2707	11.2756	19	0	5.3	2.85714	9.07508	TRUE	TRUE	4	2	TRUE	13.8421	2.71905	2.34789	2.56793
1126	1	LSM7_MOUSE	LSM7_MOUSE		40.8	103	11637	U6 snRNA-associated Sm-like protein LSm7 OS=Mus musculus GN=Lsm7 PE=2 SV=1	45	45	1	11	2	7	9	10	3	3	11	2	7	9	10	3	3	11	2	7	9	10	3	3	18	1.14286	5.42857	18.5	15.5629	2.35714	1.85714	8.97837	TRUE	TRUE	4	3	TRUE	10.7679	6.59238	0.70786	0.673113
960	1	NDC1_MOUSE	NDC1_MOUSE		23.5	673	75410	Nucleoporin NDC1 OS=Mus musculus GN=Tmem48 PE=1 SV=1	64	64	1	9	8	13	1	3	10	20	9	8	13	1	3	10	20	9	8	13	1	3	10	20	15.2857	5.85714	9.71429	4.57143	6.28571	8.19643	12.8571	8.96684	TRUE	TRUE	4	3	TRUE	8.85714	9.1131	-0.0410998	-0.252961
854	1	UTP15_MOUSE	UTP15_MOUSE		20.3	528	59376	U3 small nucleolar RNA-associated protein 15 homolog OS=Mus musculus GN=Utp15 PE=2 SV=1	69	69	1	3	11	14	0	7	16	18	3	11	14	0	7	16	18	3	11	14	0	7	16	18	6.14286	8.04757	10.7857	1.14286	11.4447	13.4301	11.2219	8.88796	TRUE	TRUE	3	3	TRUE	6.52975	12.0322	-0.881805	-1.28084
817	1	PB1_MOUSE	PB1_MOUSE		14.6	1634	187219	Protein polybromo-1 OS=Mus musculus GN=Pbrm1 PE=1 SV=3	70	70	1	3	10	17	0	7	12	21	3	10	17	0	7	12	21	3	10	17	0	7	12	21	6.07143	7.28571	12.8571	1	11.2857	9.71429	13.7659	8.85431	TRUE	TRUE	3	3	TRUE	6.80357	11.5886	-0.768344	-1.09802
970	1	UTP6_MOUSE	UTP6_MOUSE		19.4	597	70430	U3 small nucleolar RNA-associated protein 6 homolog OS=Mus musculus GN=Utp6 PE=1 SV=1	70	70	1	2	13	10	0	6	17	22	2	13	10	0	6	17	22	2	13	10	0	6	17	22	4.28571	10.1429	7.34743	1.42857	10.2857	14.2234	14	8.81624	TRUE	TRUE	3	3	TRUE	5.80114	12.8364	-1.14583	-1.45567
313	1	RL10A_MOUSE	RL10A_MOUSE		25.3	217	24917	60S ribosomal protein L10a OS=Mus musculus GN=Rpl10a PE=1 SV=3	64	64	1	4	11	13	4	4	14	14	4	11	13	4	4	14	14	4	11	13	4	4	14	14	7.28571	7.877	9.28571	10.4286	7.28571	11.1547	8.36629	8.81196	TRUE	TRUE	4	3	TRUE	8.71925	8.93557	-0.0353559	-0.253672
1049	1	IMP3_MOUSE	IMP3_MOUSE		29.9	184	21778	U3 small nucleolar ribonucleoprotein protein IMP3 OS=Mus musculus GN=Imp3 PE=2 SV=1	54	54	1	7	6	7	3	10	8	13	7	6	7	3	10	8	13	7	6	7	3	10	8	13	12.8571	4.14286	5.39986	9.22857	15.4286	6.51943	8	8.79663	TRUE	TRUE	4	3	TRUE	7.90711	9.98267	-0.336275	-0.619123
850	1	CWC22_MOUSE	CWC22_MOUSE		10.2	908	104775	Pre-mRNA-splicing factor CWC22 homolog OS=Mus musculus GN=Cwc22 PE=1 SV=1	72	72	1	0	16	16	2	0	18	20	0	16	16	2	0	18	20	0	16	16	2	0	18	20	0.857143	12.3654	12.2857	6.92857	0.857143	15.2857	12.855	8.77639	TRUE	TRUE	3	2	TRUE	8.10921	9.66595	-0.25335	-0.493056
788	1	RBM22_MOUSE	RBM22_MOUSE		25.2	420	46897	Pre-mRNA-splicing factor RBM22 OS=Mus musculus GN=Rbm22 PE=2 SV=1	72	72	1	1	20	19	1	2	9	20	1	20	19	1	2	9	20	1	20	19	1	2	9	20	2.41171	15.2857	15.1333	4.22443	4.33043	7.28571	12.6984	8.7671	TRUE	TRUE	4	3	TRUE	9.26379	8.10486	0.192815	0.040923
368	1	RS14_MOUSE	RS14_MOUSE		27.8	151	16274	40S ribosomal protein S14 OS=Mus musculus GN=Rps14 PE=2 SV=3	49	49	1	9	6	7	9	9	6	3	9	6	7	9	9	6	3	9	6	7	9	9	6	3	14.9643	3.71543	4.79586	17.8571	13.8129	4.57143	1.42857	8.73508	TRUE	TRUE	4	3	TRUE	10.3332	6.60429	0.64581	0.564667
307	1	ADT2_MOUSE	ADT2_MOUSE		34.2	298	32932	ADP/ATP translocase 2 OS=Mus musculus GN=Slc25a5 PE=1 SV=3	74	74	1	0	17	21	3	0	16	17	0	17	21	3	0	16	17	0	17	21	3	0	16	17	0	12.8571	16.7143	8.04757	0	12.8571	10.3214	8.68537	TRUE	TRUE	3	2	TRUE	9.40475	7.72619	0.283632	0.388589
1162	1	SSU72_MOUSE	SSU72_MOUSE		27.8	194	22518	RNA polymerase II subunit A C-terminal domain phosphatase SSU72 OS=Mus musculus GN=Ssu72 PE=2 SV=1	55	55	1	4	10	9	7	5	9	11	4	10	9	7	5	9	11	4	10	9	7	5	9	11	8.11257	7.28571	6.75929	15.2857	9.28571	7.51943	6.47614	8.67494	TRUE	TRUE	4	3	TRUE	9.36082	7.76043	0.270499	0.392434
866	1	RCOR1_MOUSE	RCOR1_MOUSE		26.8	477	52274	REST corepressor 1 OS=Mus musculus GN=Rcor1 PE=1 SV=2	57	57	1	5	8	13	5	4	7	15	5	8	13	5	4	7	15	5	8	13	5	4	7	15	9.79914	5.85714	9.71429	12.6607	7.57143	5.85714	9.19043	8.66433	TRUE	TRUE	4	3	TRUE	9.50782	7.53967	0.334614	0.493148
924	1	THIL_MOUSE	THIL_MOUSE		26.4	424	44817	Acetyl-CoA acetyltransferase, mitochondrial OS=Mus musculus GN=Acat1 PE=1 SV=1	52	52	1	6	17	4	15	0	4	6	6	17	4	15	0	4	6	6	17	4	15	0	4	6	11.2857	13.272	2.85714	25.5714	0.857143	2.85714	3.615	8.61651	TRUE	TRUE	4	2	TRUE	13.2466	2.4431	2.43884	3.28792
717	1	2AAA_MOUSE	2AAA_MOUSE		24.3	589	65324	Serine/threonine-protein phosphatase 2A 65 kDa regulatory subunit A alpha isoform OS=Mus musculus GN=Ppp2r1a PE=1 SV=3	69	69	1	2	10	17	2	2	13	23	2	10	17	2	2	13	23	2	10	17	2	2	13	23	4.14286	7.25	12.8571	6.46	4.28571	10.3214	14.8534	8.5958	TRUE	TRUE	4	3	TRUE	7.6775	9.82019	-0.355114	-0.54712
1304	1	AATF_MOUSE	AATF_MOUSE		18.3	526	59483	Protein AATF OS=Mus musculus GN=Aatf PE=1 SV=1	55	55	1	5	7	6	1	11	9	16	5	7	6	1	11	9	16	5	7	6	1	11	9	16	10.4286	4.76	4.57143	5.33543	17.2497	7.57143	10.1429	8.57992	TRUE	TRUE	4	3	TRUE	6.27386	11.6547	-0.893483	-1.42462
1142	1	RAVR1_MOUSE	RAVR1_MOUSE		27.4	748	79383	Ribonucleoprotein PTB-binding 1 OS=Mus musculus GN=Raver1 PE=1 SV=2	61	61	1	4	16	9	3	1	14	14	4	16	9	3	1	14	14	4	16	9	3	1	14	14	8.05114	12.4286	6.68943	9.28571	3.19043	11.5714	8.74286	8.56565	TRUE	TRUE	4	3	TRUE	9.11371	7.8349	0.218123	0.128799
814	1	CPSF4_MOUSE	CPSF4_MOUSE		28.4	211	23654	Cleavage and polyadenylation specificity factor subunit 4 OS=Mus musculus GN=Cpsf4 PE=2 SV=1	55	55	1	8	8	13	2	7	10	7	8	8	13	2	7	10	7	8	8	13	2	7	10	7	14	5.70429	9.71429	6.85714	11.2857	8.05114	4.14286	8.53649	TRUE	TRUE	4	3	TRUE	9.06893	7.82657	0.212552	0.13887
454	1	RS3A_MOUSE	RS3A_MOUSE		33.3	264	29886	40S ribosomal protein S3a OS=Mus musculus GN=Rps3a PE=1 SV=3	64	64	1	5	18	14	1	4	12	10	5	18	14	1	4	12	10	5	18	14	1	4	12	10	9.28571	13.8571	10.2857	3.73214	7.28571	9.41071	5.85714	8.53061	TRUE	TRUE	4	3	TRUE	9.29018	7.51786	0.305385	0.173213
1364	1	WDR46_MOUSE	WDR46_MOUSE		15.3	622	69049	WD repeat-containing protein 46 OS=Mus musculus GN=Wdr46 PE=2 SV=1	55	55	1	9	7	8	0	9	10	12	9	7	8	0	9	10	12	9	7	8	0	9	10	12	15.4286	4.79586	6.28571	2.85714	14.3837	8.42857	7.28571	8.49504	TRUE	TRUE	3	3	TRUE	7.34182	10.0327	-0.450495	-0.700377
524	1	NOL8_MOUSE	NOL8_MOUSE		18.4	1147	128636	Nucleolar protein 8 OS=Mus musculus GN=Nol8 PE=1 SV=2	71	71	1	1	12	14	1	2	18	23	1	12	14	1	2	18	23	1	12	14	1	2	18	23	2.28571	9	10.4286	3.884	4.14286	15.1333	14.459	8.4762	TRUE	TRUE	4	3	TRUE	6.39957	11.245	-0.813243	-0.981554
554	1	RBM27_MOUSE	RBM27_MOUSE		15.3	1060	118563	RNA-binding protein 27 OS=Mus musculus GN=Rbm27 PE=2 SV=2	62	49	0.79	4	15	11	8	9	6	9	2	13	9	5	7	5	8	2.167	14.083	10	6.5	7.412	5.313	8.32	5.02386	11.1547	7.28571	14.8534	11.916	4.33043	4.76	8.47488	TRUE	TRUE	4	3	TRUE	9.57943	7.00214	0.452143	0.0878224
653	1	ZN512_MOUSE	ZN512_MOUSE		31.5	562	63909	Zinc finger protein 512 OS=Mus musculus GN=Znf512 PE=2 SV=2	53	53	1	7	9	4	3	10	8	12	7	9	4	3	10	8	12	7	9	4	3	10	8	12	12.4066	6.14286	2.85714	8.93114	15.2494	6.33329	7.28571	8.45802	TRUE	TRUE	4	3	TRUE	7.58443	9.62281	-0.343418	-0.568813
459	1	SMRC1_MOUSE	SMRC1_MOUSE		17.1	1104	122891	SWI/SNF complex subunit SMARCC1 OS=Mus musculus GN=Smarcc1 PE=1 SV=2	187	43	0.23	12	35	30	10	18	46	36	5	5	6	2	3	12	10	5.745	7.273	8.057	2.286	3.714	16.69	13.333	10.535	4.89614	6.29386	7.898	7.24486	13.8129	8.04757	8.38976	TRUE	FALSE	4	3	TRUE	7.40575	9.70176	-0.389601	-0.622006
639	1	SURF4_MOUSE	SURF4_MOUSE		11.9	269	30382	Surfeit locus protein 4 OS=Mus musculus GN=Surf4 PE=2 SV=1	62	62	1	4	13	19	3	1	9	13	4	13	19	3	1	9	13	4	13	19	3	1	9	13	7.34743	9.74457	15.0956	8.79786	2.57486	7.28571	7.877	8.389	TRUE	TRUE	4	3	TRUE	10.2464	5.91252	0.793265	0.499728
446	1	TXN4A_MOUSE	TXN4A_MOUSE		49.3	142	16787	Thioredoxin-like protein 4A OS=Mus musculus GN=Txnl4a PE=2 SV=1	60	60	1	3	13	11	3	8	7	15	3	13	11	3	8	7	15	3	13	11	3	8	7	15	5.70429	9.71429	8	8.46429	12.3654	5.42857	9	8.38241	TRUE	TRUE	4	3	TRUE	7.97071	8.93133	-0.164167	-0.403585
60	1	MNDAL_MOUSE	MNDAL_MOUSE		24.7	538	60527	Myeloid cell nuclear differentiation antigen-like protein OS=Mus musculus GN=Mndal PE=2 SV=1	62	61	0.984	6	12	15	3	2	9	15	6	12	15	3	2	9	14	6	12	15	3	2	9	14.933	10.6379	8.71429	11.1429	8	3.87214	7.19043	8.93114	8.35553	TRUE	TRUE	4	3	TRUE	9.62375	6.66457	0.530087	0.136137
1282	1	SAS10_MOUSE	SAS10_MOUSE		24.1	469	53400	Something about silencing protein 10 OS=Mus musculus GN=Utp3 PE=1 SV=1	56	56	1	3	7	11	2	9	12	12	3	7	11	2	9	12	12	3	7	11	2	9	12	12	6.53186	4.71429	8.11257	7.5	14.3053	9.79914	7.28571	8.32127	TRUE	TRUE	4	3	TRUE	6.71468	10.4634	-0.639959	-0.949079
1041	1	HNRLL_MOUSE	HNRLL_MOUSE		30.5	591	64126	Heterogeneous nuclear ribonucleoprotein L-like OS=Mus musculus GN=Hnrpll PE=1 SV=3	58	58	1	5	19	9	4	0	6	15	5	19	9	4	0	6	15	5	19	9	4	0	6	15	10.1429	14.9643	6.652	11.173	1.14286	4.71429	9.28571	8.29643	TRUE	TRUE	4	2	TRUE	10.733	5.04762	1.08838	0.676072
155	1	GCR_MOUSE	GCR_MOUSE		23.8	783	86054	Glucocorticoid receptor OS=Mus musculus GN=Nr3c1 PE=1 SV=1	53	53	1	5	13	16	15	0	2	2	5	13	16	15	0	2	2	5	13	16	15	0	2	2	9	9.65471	12.14	25.1806	0	1.14286	0.857143	8.28218	TRUE	TRUE	4	2	TRUE	13.9938	0.666667	4.39168	3.71125
925	1	M89BB_MOUSE	M89BB_MOUSE		19	732	82751	Cell cycle regulator Mat89Bb homolog OS=Mus musculus PE=2 SV=1	62	62	1	2	14	14	2	2	14	14	2	14	14	2	2	14	14	2	14	14	2	2	14	14	4.28571	10.8571	10.8221	7.19043	4.57143	11.2857	8.66943	8.24029	TRUE	TRUE	4	3	TRUE	8.28886	8.17552	0.019862	-0.308074
610	1	PON3_MOUSE	PON3_MOUSE		28	354	39352	Serum paraoxonase/lactonase 3 OS=Mus musculus GN=Pon3 PE=2 SV=2	53	53	1	9	9	8	3	5	7	12	9	9	8	3	5	7	12	9	9	8	3	5	7	12	15.1747	6.07257	5.85714	8.78571	8.948	5.49557	7.28571	8.23135	TRUE	TRUE	4	3	TRUE	8.97254	7.2431	0.308909	-0.176084
215	1	HNF1A_MOUSE	HNF1A_MOUSE		27.1	628	67238	Hepatocyte nuclear factor 1-alpha OS=Mus musculus GN=Hnf1a PE=1 SV=1	68	50	0.735	1	16	12	4	2	8	25	1	11	9	4	2	6	17	1	14.929	11.7	4	2	7.5	23.476	1.91071	11.2756	8.36629	10.2467	4.14286	6.07143	15.1747	8.16976	TRUE	TRUE	4	3	TRUE	7.94982	8.463	-0.0902467	-0.498869
1329	1	QKI_MOUSE	QKI_MOUSE		22.9	341	37672	Protein quaking OS=Mus musculus GN=Qki PE=1 SV=1	47	47	1	6	7	9	7	4	6	8	6	7	9	7	4	6	8	6	7	9	7	4	6	8	11.8571	4.78414	7.02	15.4286	8.04757	4.89514	4.71429	8.10669	TRUE	TRUE	4	3	TRUE	9.77246	5.88567	0.731517	0.203331
705	1	KDM1A_MOUSE	KDM1A_MOUSE		22.9	853	92852	Lysine-specific histone demethylase 1A OS=Mus musculus GN=Kdm1a PE=1 SV=2	61	61	1	9	13	13	0	2	12	12	9	13	13	0	2	12	12	9	13	13	0	2	12	12	15.2857	9.79914	9.51886	0.857143	4.28571	9.71429	7.28571	8.10665	TRUE	TRUE	3	3	TRUE	8.86521	7.09524	0.321304	-0.130788
1054	1	LRC59_MOUSE	LRC59_MOUSE		37.5	307	34878	Leucine-rich repeat-containing protein 59 OS=Mus musculus GN=Lrrc59 PE=2 SV=1	57	57	1	5	9	16	1	4	7	15	5	9	16	1	4	7	15	5	9	16	1	4	7	15	10.1429	6.42857	12.4066	4.57143	8	5.85714	9.28571	8.0989	TRUE	TRUE	4	3	TRUE	8.38736	7.71429	0.120684	-0.246402
896	1	UD3A2_MOUSE	UD3A2_MOUSE		11.3	523	59674	UDP-glucuronosyltransferase 3A2 OS=Mus musculus GN=Ugt3a2 PE=2 SV=2	50	50	1	5	9	13	9	1	8	5	5	9	13	9	1	8	5	5	9	13	9	1	8	5	9.97614	6.21429	9.71429	18.5	2.85714	6.43371	2.85714	8.07896	TRUE	TRUE	4	3	TRUE	11.1012	4.04933	1.45496	0.880931
489	1	LARP7_MOUSE	LARP7_MOUSE		18.1	570	64803	La-related protein 7 OS=Mus musculus GN=Larp7 PE=1 SV=2	51	51	1	6	10	7	4	6	11	7	6	10	7	4	6	11	7	6	10	7	4	6	11	7	11.1429	6.92857	4.982	10.7857	9.73814	8.79786	4.14286	8.074	TRUE	TRUE	4	3	TRUE	8.45979	7.55962	0.162308	-0.228499
1208	1	PPIL2_MOUSE	PPIL2_MOUSE		28	521	59066	Peptidyl-prolyl cis-trans isomerase-like 2 OS=Mus musculus GN=Ppil2 PE=2 SV=2	52	52	1	5	7	5	3	6	4	22	5	7	5	3	6	4	22	5	7	5	3	6	4	22	10.2857	4.71429	3.803	9.51886	10.4286	3.28571	14	8.00516	TRUE	TRUE	4	3	TRUE	7.08046	9.2381	-0.383751	-0.769459
797	1	SUN2_MOUSE	SUN2_MOUSE		16.5	699	78196	SUN domain-containing protein 2 OS=Mus musculus GN=Sun2 PE=1 SV=2	57	57	1	5	14	10	2	2	10	14	5	14	10	2	2	10	14	5	14	10	2	2	10	14	9.71429	10.8571	7.28571	6.8	4.42443	8.04757	8.46429	7.94192	TRUE	TRUE	4	3	TRUE	8.66429	6.97876	0.31211	-0.0954982
997	1	NOC3L_MOUSE	NOC3L_MOUSE		13.6	807	93226	Nucleolar complex protein 3 homolog OS=Mus musculus GN=Noc3l PE=2 SV=1	54	54	1	1	10	6	5	3	15	14	1	10	6	5	3	15	14	1	10	6	5	3	15	14	2.85714	7.28571	4.57143	12.8571	6.42857	12.4066	8.71429	7.87441	TRUE	TRUE	4	3	TRUE	6.89286	9.18314	-0.413886	-0.736374
699	1	CP254_MOUSE	CP254_MOUSE		30.2	490	55859	Cytochrome P450 2C54 OS=Mus musculus GN=Cyp2c54 PE=2 SV=1	124	13	0.105	22	35	36	19	2	3	7	4	3	4	0	1	0	1	19.229	9.636	15.132	0	1.333	0	5	29.3074	6.51943	11.6796	0.857143	3.76186	0	2.85714	7.85465	TRUE	FALSE	4	3	TRUE	12.0909	2.20633	2.4542	2.75386
383	1	RL18A_MOUSE	RL18A_MOUSE		24.4	176	20733	60S ribosomal protein L18a OS=Mus musculus GN=Rpl18a PE=1 SV=1	60	60	1	3	14	11	2	4	7	19	3	14	11	2	4	7	19	3	14	11	2	4	7	19	5.555	10.535	7.94286	6.21429	7.28571	5.40814	11.5714	7.78749	TRUE	TRUE	4	3	TRUE	7.56179	8.08843	-0.0971325	-0.34159
302	1	RL9_MOUSE	RL9_MOUSE		27.1	192	21882	60S ribosomal protein L9 OS=Mus musculus GN=Rpl9 PE=2 SV=2	58	58	1	4	12	15	1	6	10	10	4	12	15	1	6	10	10	4	12	15	1	6	10	10	7.28571	8.79786	11.2857	3.51943	9.71429	8	5.85714	7.78002	TRUE	TRUE	4	3	TRUE	7.72218	7.85714	-0.0249969	-0.216742
636	1	UT14A_MOUSE	UT14A_MOUSE		25.3	767	87266	U3 small nucleolar RNA-associated protein 14 homolog A OS=Mus musculus GN=Utp14a PE=2 SV=1	54	54	1	2	6	11	2	11	11	11	2	6	11	2	11	11	11	2	6	11	2	11	11	11	4.14286	3.88886	8	6.42857	16.4286	9	6.42857	7.75963	TRUE	TRUE	4	3	TRUE	5.61507	10.619	-0.919278	-1.2383
803	1	THOC5_MOUSE	THOC5_MOUSE		25.2	683	78687	THO complex subunit 5 homolog OS=Mus musculus GN=Thoc5 PE=1 SV=2	66	66	1	1	12	14	1	1	9	28	1	12	14	1	1	9	28	1	12	14	1	1	9	28	2.42857	9	10.6379	4.28571	2.85714	7.28571	17.7947	7.75567	TRUE	TRUE	4	3	TRUE	6.58804	9.31252	-0.499324	-0.765739
1211	1	NOL7_MOUSE	NOL7_MOUSE		13	254	28971	Nucleolar protein 7 OS=Mus musculus GN=Nol7 PE=1 SV=1	44	44	1	4	10	5	3	10	8	4	4	10	5	3	10	8	4	4	10	5	3	10	8	4	8.36629	7.28571	3.80957	9.65471	15.815	6.75929	2.57143	7.75171	TRUE	TRUE	4	3	TRUE	7.27907	8.3819	-0.203524	-0.411926
724	1	LC7L2_MOUSE	LC7L2_MOUSE		22.2	392	46584	Putative RNA-binding protein Luc7-like 2 OS=Mus musculus GN=Luc7l2 PE=1 SV=1	69	28	0.406	4	17	22	4	2	7	13	3	9	6	2	1	4	3	3.6	14.538	16.667	3	1.167	5.5	10.5	6.8	11.2197	12.5239	9	3.73814	4.46829	6.21429	7.70918	TRUE	TRUE	4	3	TRUE	9.88589	4.8069	1.04026	1.11427
768	1	TNPO1_MOUSE	TNPO1_MOUSE		21.5	898	102358	Transportin-1 OS=Mus musculus GN=Tnpo1 PE=1 SV=2	57	41	0.719	3	11	19	5	0	5	14	3	7	15	2	0	2	12	3	10.5	18.75	5	0	5	14	6.04757	7.5	14.716	12.3654	0.714286	4.14286	8.42857	7.7021	TRUE	TRUE	4	2	TRUE	10.1572	4.42857	1.1976	1.31019
1248	1	BRX1_MOUSE	BRX1_MOUSE		18.1	353	41242	Ribosome biogenesis protein BRX1 homolog OS=Mus musculus GN=Brix1 PE=2 SV=3	65	65	1	0	18	6	0	2	8	31	0	18	6	0	2	8	31	0	18	6	0	2	8	31	1.42857	14	4.57143	2.347	4.85714	6.8	19.6857	7.66998	TRUE	TRUE	2	3	TRUE	5.58675	10.4476	-0.903093	-1.25378
839	1	ZHX2_MOUSE	ZHX2_MOUSE		34.3	836	92260	Zinc fingers and homeoboxes protein 2 OS=Mus musculus GN=Zhx2 PE=1 SV=1	62	62	1	1	14	10	1	2	14	20	1	14	10	1	2	14	20	1	14	10	1	2	14	20	2.47271	10.8571	7.28571	4.28571	4.57143	11.173	12.711	7.62239	TRUE	TRUE	4	3	TRUE	6.22532	9.48514	-0.607521	-0.807697
1357	1	MCM3A_MOUSE	MCM3A_MOUSE		17.1	1971	217141	80 kDa MCM3-associated protein OS=Mus musculus GN=Mcm3ap PE=2 SV=1	58	58	1	1	12	14	0	3	13	15	1	12	14	0	3	13	15	1	12	14	0	3	13	15	3.26686	9.28571	11	2.85714	6.85714	10.5546	9.42857	7.60714	TRUE	TRUE	3	3	TRUE	6.60243	8.94676	-0.438369	-0.665484
361	1	RS7_MOUSE	RS7_MOUSE		20.6	194	22128	40S ribosomal protein S7 OS=Mus musculus GN=Rps7 PE=2 SV=1	43	43	1	4	7	4	13	8	1	6	4	7	4	13	8	1	6	4	7	4	13	8	1	6	7.28571	4.28571	2.62929	22.7909	12.2857	0.642857	3.28571	7.60084	TRUE	TRUE	4	3	TRUE	9.24789	5.40476	0.774894	1.13397
682	1	DCA13_MOUSE	DCA13_MOUSE		37.3	445	51471	DDB1- and CUL4-associated factor 13 OS=Mus musculus GN=Dcaf13 PE=2 SV=1	65	65	1	1	10	18	0	2	17	17	1	10	18	0	2	17	17	1	10	18	0	2	17	17	2.28571	7.02143	14	0.723857	4.25714	14	10.7857	7.58198	TRUE	TRUE	3	3	TRUE	6.00775	9.68095	-0.688324	-1.07245
874	1	SF04_MOUSE	SF04_MOUSE		15.2	643	72650	Splicing factor 4 OS=Mus musculus GN=Sf4 PE=1 SV=1	51	51	1	5	8	12	2	4	7	13	5	8	12	2	4	7	13	5	8	12	2	4	7	13	9.94643	5.85714	8.78571	7.02	7.60443	5.85714	7.94286	7.57339	TRUE	TRUE	4	3	TRUE	7.90232	7.13481	0.147402	0.200597
430	1	EBP_MOUSE	EBP_MOUSE		9.6	230	26216	3-beta-hydroxysteroid-Delta(8),Delta(7)-isomerase OS=Mus musculus GN=Ebp PE=1 SV=3	46	46	1	5	7	11	9	3	6	5	5	7	11	9	3	6	5	5	7	11	9	3	6	5	9.28571	4.46829	8	17.8571	5.85714	4.57143	2.85714	7.55669	TRUE	TRUE	4	3	TRUE	9.90279	4.42857	1.16099	1.7546
1293	1	WDR12_MOUSE	WDR12_MOUSE		25.8	423	47348	Ribosome biogenesis protein WDR12 OS=Mus musculus GN=Wdr12 PE=2 SV=1	49	49	1	4	9	8	2	6	6	14	4	9	8	2	6	6	14	4	9	8	2	6	6	14	8.42857	6.42857	6.27571	7.555	10.535	4.873	8.79786	7.55624	TRUE	TRUE	4	3	TRUE	7.17196	8.06862	-0.169953	-0.31843
1105	1	RRBP1_MOUSE	RRBP1_MOUSE		12.1	1605	172880	Ribosome-binding protein 1 OS=Mus musculus GN=Rrbp1 PE=2 SV=2	40	40	1	10	6	5	3	8	5	3	10	6	5	3	8	5	3	10	6	5	3	8	5	3	16.8317	4.14286	3.73814	9.24114	12.8571	4.14286	1.85714	7.54443	TRUE	TRUE	4	3	TRUE	8.48846	6.28571	0.433427	0.641688
422	1	GBLP_MOUSE	GBLP_MOUSE		40.4	317	35078	Guanine nucleotide-binding protein subunit beta-2-like 1 OS=Mus musculus GN=Gnb2l1 PE=1 SV=3	68	68	1	1	15	20	0	0	11	21	1	15	20	0	0	11	21	1	15	20	0	0	11	21	2.25	11.5714	16.4286	0.142857	0	8.78571	13.4867	7.52361	TRUE	TRUE	3	2	TRUE	7.59821	7.42414	0.0334359	-0.046043
1360	1	TIM8A_MOUSE	TIM8A_MOUSE		34	97	11043	Mitochondrial import inner membrane translocase subunit Tim8 A OS=Mus musculus GN=Timm8a1 PE=1 SV=1	52	52	1	2	16	12	1	3	12	6	2	16	12	1	3	12	6	2	16	12	1	3	12	6	4.89514	12.5536	9	5.42857	6.85714	9.97614	3.85714	7.50967	TRUE	TRUE	4	3	TRUE	7.96932	6.89681	0.208528	-0.0394219
236	1	RL3_MOUSE	RL3_MOUSE		22.3	403	46125	60S ribosomal protein L3 OS=Mus musculus GN=Rpl3 PE=2 SV=2	69	69	1	1	15	13	0	3	8	29	1	15	13	0	3	8	29	1	15	13	0	3	8	29	1.96429	11.2857	9.23814	0	5.43229	6.21429	18.0354	7.45288	TRUE	TRUE	3	3	TRUE	5.62204	9.894	-0.815461	-0.799615
381	1	RPB7_MOUSE	RPB7_MOUSE		45.9	172	19295	DNA-directed RNA polymerase II subunit RPB7 OS=Mus musculus GN=Polr2g PE=2 SV=1	56	56	1	5	15	14	1	2	9	10	5	15	14	1	2	9	10	5	15	14	1	2	9	10	9.19043	11.392	10.2857	3.64286	4.14286	7.28571	5.85714	7.39953	TRUE	TRUE	4	3	TRUE	8.62775	5.7619	0.582439	0.167955
385	1	RL23A_MOUSE	RL23A_MOUSE		31.4	156	17696	60S ribosomal protein L23a OS=Mus musculus GN=Rpl23a PE=2 SV=1	42	42	1	7	7	5	5	9	5	4	7	7	5	5	9	5	4	7	7	5	5	9	5	4	12.3333	4.33043	3.322	11.8571	13.8571	3.803	2.28571	7.39839	TRUE	TRUE	4	3	TRUE	7.96071	6.64862	0.259843	-0.134458
1283	1	DMAP1_MOUSE	DMAP1_MOUSE		21.4	468	53131	DNA methyltransferase 1-associated protein 1 OS=Mus musculus GN=Dmap1 PE=1 SV=1	39	39	1	6	1	7	4	9	5	7	6	1	7	4	9	5	7	6	1	7	4	9	5	7	11.5714	0.571429	5.42857	11.2857	14.3513	4.28571	4.28571	7.39712	TRUE	TRUE	4	3	TRUE	7.21429	7.6409	-0.0828869	-0.362023
609	1	CTR9_MOUSE	CTR9_MOUSE		13.8	1173	133409	RNA polymerase-associated protein CTR9 homolog OS=Mus musculus GN=Ctr9 PE=1 SV=2	55	55	1	3	10	8	3	2	9	20	3	10	8	3	2	9	20	3	10	8	3	2	9	20	5.90471	7.02	5.85714	8.78571	4.22443	7.28571	12.5536	7.3759	TRUE	TRUE	4	3	TRUE	6.89189	8.02124	-0.218925	-0.494889
525	1	CI114_MOUSE	CI114_MOUSE		20.3	385	42959	Uncharacterized protein C9orf114 homolog OS=Mus musculus GN=D2Wsu81e PE=2 SV=1	50	50	1	6	8	6	1	6	15	8	6	8	6	1	6	15	8	6	8	6	1	6	15	8	11.1547	5.42857	4.14286	3.88886	9.79914	12.2619	4.57143	7.32106	TRUE	TRUE	4	3	TRUE	6.15375	8.87748	-0.528684	-0.714987
841	1	ZHX3_MOUSE	ZHX3_MOUSE		18.5	951	104344	Zinc fingers and homeoboxes protein 3 OS=Mus musculus GN=Zhx3 PE=2 SV=2	49	49	1	2	4	8	5	4	12	14	2	4	8	5	4	12	14	2	4	8	5	4	12	14	4.22443	2.28571	6	12.5536	7.555	9.71429	8.59914	7.27602	TRUE	TRUE	4	3	TRUE	6.26593	8.62281	-0.46063	-0.638379
293	1	T23O_MOUSE	T23O_MOUSE		25.9	406	47757	Tryptophan 2,3-dioxygenase OS=Mus musculus GN=Tdo2 PE=1 SV=2	62	62	1	2	9	7	1	3	13	27	2	9	7	1	3	13	27	2	9	7	1	3	13	27	3.803	6	4.78414	3.35943	5.70429	10.1429	16.9024	7.24231	TRUE	TRUE	4	3	TRUE	4.48664	10.9165	-1.28281	-1.20491
281	1	AL3A2_MOUSE	AL3A2_MOUSE		19.4	484	53944	Fatty aldehyde dehydrogenase OS=Mus musculus GN=Aldh3a2 PE=2 SV=1	45	45	1	8	12	14	6	1	2	2	8	12	14	6	1	2	2	8	12	14	6	1	2	2	13.5571	8.78571	10.1429	13.5571	2.28571	1.14286	0.857143	7.1898	TRUE	TRUE	4	3	TRUE	11.5107	1.42857	3.01033	1.867
327	1	CP237_MOUSE	CP237_MOUSE		25.3	490	55514	Cytochrome P450 2C37 OS=Mus musculus GN=Cyp2c37 PE=2 SV=1	122	12	0.098	19	43	30	20	2	3	5	0	7	1	3	0	1	0	0	23.248	3.774	17.014	0	1.25	0	0	18.0354	2.39629	28.8516	0	1.03571	0	7.18843	TRUE	FALSE	4	3	TRUE	12.3208	0.345238	5.15736	3.39409
1128	1	MFAP1_MOUSE	MFAP1_MOUSE		23	439	51955	Microfibrillar-associated protein 1 OS=Mus musculus GN=Mfap1 PE=1 SV=1	55	55	1	3	13	15	0	2	8	14	3	13	15	0	2	8	14	3	13	15	0	2	8	14	6.43371	10.2857	11.5714	1.96643	4.71429	6.57143	8.72729	7.18147	TRUE	TRUE	3	3	TRUE	7.56432	6.671	0.181308	-0.176715
640	1	UD16_MOUSE	UD16_MOUSE		29.4	531	60440	UDP-glucuronosyltransferase 1-6 OS=Mus musculus GN=Ugt1a6 PE=1 SV=1	287	39	0.136	21	50	63	26	22	39	66	0	3	14	3	1	5	13	0	4.657	19.433	3.958	1.621	7.452	18.827	0.428571	2.60971	15.7101	10.092	3.803	6.06457	11.4447	7.16467	TRUE	FALSE	4	3	TRUE	7.21011	7.1041	0.0213698	-0.325965
168	1	GSTM1_MOUSE	GSTM1_MOUSE		44	218	25971	Glutathione S-transferase Mu 1 OS=Mus musculus GN=Gstm1 PE=1 SV=2	50	50	1	5	11	23	2	3	4	2	5	11	23	2	3	4	2	5	11	23	2	3	4	2	9	7.60443	18.5	5.85714	5.42857	2.85714	0.857143	7.15778	TRUE	TRUE	4	3	TRUE	10.2404	3.04762	1.74852	0.934893
1258	1	IPO7_MOUSE	IPO7_MOUSE		13.1	1038	119487	Importin-7 OS=Mus musculus GN=Ipo7 PE=1 SV=2	44	44	1	4	9	9	3	3	7	9	4	9	9	3	3	7	9	4	9	9	3	3	7	9	8.42857	6.42857	6.85714	9.71429	6.8	6	5.57086	7.1142	TRUE	TRUE	4	3	TRUE	7.85714	6.12362	0.35962	-0.0128592
759	1	NIPA_MOUSE	NIPA_MOUSE		33.1	501	55197	Nuclear-interacting partner of ALK OS=Mus musculus GN=Zc3hc1 PE=1 SV=1	49	49	1	7	10	8	1	4	2	17	7	10	8	1	4	2	17	7	10	8	1	4	2	17	12.5536	7.28571	5.90471	4.20414	7.47957	1.381	10.8221	7.09012	TRUE	TRUE	4	3	TRUE	7.48704	6.5609	0.1905	-0.134697
959	1	EXOS2_MOUSE	EXOS2_MOUSE		24.2	293	32633	Exosome complex exonuclease RRP4 OS=Mus musculus GN=Exosc2 PE=2 SV=1	43	43	1	7	7	6	2	6	5	10	7	7	6	2	6	5	10	7	7	6	2	6	5	10	12.8571	4.57143	4.57143	7.28571	10.2467	4.14286	5.92857	7.08627	TRUE	TRUE	4	3	TRUE	7.32143	6.77271	0.112391	-0.217174
1305	1	HMGN5_MOUSE	HMGN5_MOUSE		36.7	406	45345	High mobility group nucleosome-binding domain-containing protein 5 OS=Mus musculus GN=Hmgn5 PE=1 SV=2	54	54	1	0	15	15	1	1	10	12	0	15	15	1	1	10	12	0	15	15	1	1	10	12	1.42857	11.8571	11.5714	5.35271	3.60957	8.42857	7.28571	7.07624	TRUE	TRUE	3	3	TRUE	7.55246	6.44129	0.229599	-0.114773
825	1	TOX4_MOUSE	TOX4_MOUSE		15.8	619	65992	TOX high mobility group box family member 4 OS=Mus musculus GN=Tox4 PE=1 SV=2	54	54	1	2	11	9	1	4	9	18	2	11	9	1	4	9	18	2	11	9	1	4	9	18	4.20414	8.00929	6.57143	4.28571	7.51943	7.28571	11.2197	7.01363	TRUE	TRUE	4	3	TRUE	5.76764	8.67495	-0.588874	-0.68205
674	1	NSD3_MOUSE	NSD3_MOUSE		9	1439	161003	Histone-lysine N-methyltransferase NSD3 OS=Mus musculus GN=Whsc1l1 PE=1 SV=2	47	47	1	9	8	9	0	7	8	6	9	8	9	0	7	8	6	9	8	9	0	7	8	6	15.2857	5.49557	6.43371	0.714286	11.173	6.42857	3.32771	6.9798	TRUE	TRUE	3	3	TRUE	6.98232	6.97643	0.0012181	-0.317626
822	1	EXOS6_MOUSE	EXOS6_MOUSE		27.5	273	28371	Exosome complex exonuclease MTR3 OS=Mus musculus GN=Exosc6 PE=2 SV=1	48	48	1	2	9	10	3	4	13	7	2	9	10	3	4	13	7	2	9	10	3	4	13	7	4.14286	6.14286	7.28571	9	7.5	10.4286	4.14286	6.94898	TRUE	TRUE	4	3	TRUE	6.64286	7.35714	-0.147342	-0.346809
745	1	CA174_MOUSE	CA174_MOUSE		42.6	230	24775	UPF0688 protein C1orf174 homolog OS=Mus musculus PE=1 SV=1	33	33	1	12	2	5	6	6	0	2	12	2	5	6	6	0	2	12	2	5	6	6	0	2	19.1076	0.857143	3.64286	14	9.97614	0	1	6.94053	TRUE	TRUE	4	2	TRUE	9.40189	3.65871	1.36161	2.05408
1048	1	PDIA5_MOUSE	PDIA5_MOUSE		26.1	517	59268	Protein disulfide-isomerase A5 OS=Mus musculus GN=Pdia5 PE=2 SV=1	46	46	1	3	10	10	2	4	8	9	3	10	10	2	4	8	9	3	10	10	2	4	8	9	6.42857	7.28571	7.5	7.28571	7.94286	6.47614	5.43229	6.90733	TRUE	TRUE	4	3	TRUE	7.125	6.6171	0.106692	0.181195
193	1	CP2A4_MOUSE	CP2A4_MOUSE		48.2	494	56596	Cytochrome P450 2A4 OS=Mus musculus GN=Cyp2a4 PE=2 SV=2	262	14	0.053	25	57	16	27	21	41	75	0	6	0	0	0	2	6	0	29.704	0	0	0	10.389	23.746	0	24.4816	0	0	0	8.59914	15.2494	6.90431	TRUE	FALSE	4	3	TRUE	6.12039	7.94952	-0.377244	-0.580952
1359	1	NOC2L_MOUSE	NOC2L_MOUSE		9.1	747	85425	Nucleolar complex protein 2 homolog OS=Mus musculus GN=Noc2l PE=1 SV=2	45	45	1	2	6	5	2	6	12	12	2	6	5	2	6	12	12	2	6	5	2	6	12	12	4.873	4.14286	3.88886	7.60443	10.5546	9.94643	7.28571	6.89941	TRUE	TRUE	4	3	TRUE	5.12729	9.26224	-0.853166	-1.30635
113	1	SAP18_MOUSE	SAP18_MOUSE		37.3	153	17596	Histone deacetylase complex subunit SAP18 OS=Mus musculus GN=Sap18 PE=2 SV=1	50	50	1	1	12	10	4	4	9	10	1	12	10	4	4	9	10	1	12	10	4	4	9	10	1.77686	8.72243	7.24486	10.1429	7.28571	7.25	5.85714	6.89712	TRUE	TRUE	4	3	TRUE	6.97175	6.79762	0.0364913	0.150419
1213	1	PPIH_MOUSE	PPIH_MOUSE		26.1	188	20465	Peptidyl-prolyl cis-trans isomerase H OS=Mus musculus GN=Ppih PE=2 SV=1	48	48	1	2	13	10	3	0	10	10	2	13	10	3	0	10	10	2	13	10	3	0	10	10	4.57143	10.2857	7.57143	9.71429	1.42857	8.42357	6.07143	6.86663	TRUE	TRUE	4	2	TRUE	8.03571	5.30786	0.598297	1.03966
473	1	CO1A2_MOUSE	CO1A2_MOUSE		8	1372	129558	Collagen alpha-2(I) chain OS=Mus musculus GN=Col1a2 PE=2 SV=2	46	46	1	3	7	3	2	5	19	7	3	7	3	2	5	19	7	3	7	3	2	5	19	7	5.85714	4.47143	1.85714	6.28571	8.78571	16.4286	4.14286	6.83265	TRUE	TRUE	4	3	TRUE	4.61786	9.78571	-1.08345	-1.57051
966	1	FIBG_MOUSE	FIBG_MOUSE		32.8	436	49392	Fibrinogen gamma chain OS=Mus musculus GN=Fgg PE=2 SV=1	51	51	1	0	19	5	1	2	18	6	0	19	5	1	2	18	6	0	19	5	1	2	18	6	0.881	14.8989	3.71429	4.57143	4.57143	15.2857	3.64286	6.79508	TRUE	TRUE	3	3	TRUE	6.01639	7.83333	-0.380728	-0.446831
285	1	RL5_MOUSE	RL5_MOUSE		38.4	297	34402	60S ribosomal protein L5 OS=Mus musculus GN=Rpl5 PE=1 SV=3	51	51	1	1	10	8	4	3	12	13	1	10	8	4	3	12	13	1	10	8	4	3	12	13	2	6.68943	5.85714	10.3214	5.64871	9.28571	7.57143	6.76769	TRUE	TRUE	4	3	TRUE	6.217	7.50195	-0.271048	-0.381944
80	1	RPA1_MOUSE	RPA1_MOUSE		17.6	1717	194111	DNA-directed RNA polymerase I subunit RPA1 OS=Mus musculus GN=Polr1a PE=1 SV=2	55	55	1	5	11	13	0	4	7	15	5	11	13	0	4	7	15	5	11	13	0	4	7	15	9	7.57143	9.22857	0	7.28571	5.2	9	6.7551	TRUE	TRUE	3	3	TRUE	6.45	7.1619	-0.151044	-0.207205
553	1	NOL10_MOUSE	NOL10_MOUSE		28.1	687	80078	Nucleolar protein 10 OS=Mus musculus GN=Nol10 PE=2 SV=1	59	59	1	1	6	17	1	0	15	19	1	6	17	1	0	15	19	1	6	17	1	0	15	19	2.28571	3.87214	12.8571	3.98986	0.285714	12.2857	11.5714	6.73539	TRUE	TRUE	4	2	TRUE	5.75121	8.04762	-0.484695	-0.600975
986	1	THOC3_MOUSE	THOC3_MOUSE		22.2	351	38739	THO complex subunit 3 OS=Mus musculus GN=Thoc3 PE=2 SV=1	54	54	1	2	9	12	0	3	12	16	2	9	12	0	3	12	16	2	9	12	0	3	12	16	4.46829	6.28571	8.79786	1.42857	6.42857	9.71429	9.97614	6.72849	TRUE	TRUE	3	3	TRUE	5.24511	8.70633	-0.731093	-0.89068
176	1	HS90B_MOUSE	HS90B_MOUSE		23.9	724	83326	Heat shock protein HSP 90-beta OS=Mus musculus GN=Hsp90ab1 PE=1 SV=2	71	13	0.183	8	13	9	15	8	11	7	1	2	3	2	0	3	2	3.833	7.111	6.125	11.429	0	9.375	3.333	6.83329	4.873	4.58929	20.9611	0	7.64086	2.19043	6.72686	TRUE	FALSE	4	3	TRUE	9.31418	3.2771	1.50701	1.87645
1099	1	DDX50_MOUSE	DDX50_MOUSE		27.7	734	82177	ATP-dependent RNA helicase DDX50 OS=Mus musculus GN=Ddx50 PE=2 SV=1	46	46	1	5	8	10	1	2	7	13	5	8	10	1	2	7	13	5	8	10	1	2	7	13	10.2467	5.85714	7.51943	4.71429	4.71429	5.85714	8	6.70129	TRUE	TRUE	4	3	TRUE	7.08439	6.19048	0.194594	0.216236
393	1	ELOB_MOUSE	ELOB_MOUSE		71.2	118	13171	Transcription elongation factor B polypeptide 2 OS=Mus musculus GN=Tceb2 PE=1 SV=1	43	43	1	5	5	3	3	7	8	12	5	5	3	3	7	8	12	5	5	3	3	7	8	12	9.23814	2.85714	1.85714	8.42357	11	6.28571	7.02	6.66882	TRUE	TRUE	4	3	TRUE	5.594	8.1019	-0.534381	-0.746404
247	1	HMGB2_MOUSE	HMGB2_MOUSE		27.1	210	24163	High mobility group protein B2 OS=Mus musculus GN=Hmgb2 PE=1 SV=3	139	40	0.288	2	20	27	14	21	21	34	1	7	10	2	2	8	10	1.111	9.22	12.615	2.6	2.469	9.6	11.326	3.322	6.46	9.145	7.94286	5.35271	7.70357	6.68943	6.65937	TRUE	FALSE	4	3	TRUE	6.71746	6.5819	0.0294116	-0.0455197
507	1	CWC27_MOUSE	CWC27_MOUSE		32.6	469	53544	Peptidyl-prolyl cis-trans isomerase CWC27 homolog OS=Mus musculus GN=Cwc27 PE=1 SV=1	54	54	1	3	11	11	1	1	10	17	3	11	11	1	1	10	17	3	11	11	1	1	10	17	5.85714	7.94286	8	3.80957	2.35714	8	10.5546	6.6459	TRUE	TRUE	4	3	TRUE	6.40239	6.97057	-0.122666	-0.117488
1022	1	FTCD_MOUSE	FTCD_MOUSE		26.4	541	58940	Formimidoyltransferase-cyclodeaminase OS=Mus musculus GN=Ftcd PE=1 SV=1	51	51	1	3	9	11	1	1	7	19	3	9	11	1	1	7	19	3	9	11	1	1	7	19	6.42857	6.29386	8.04757	4.57143	2.85714	5.85714	12.2296	6.61218	TRUE	TRUE	4	3	TRUE	6.33536	6.98129	-0.140067	-0.189143
1020	1	CY250_MOUSE	CY250_MOUSE		33.5	490	55675	Cytochrome P450 2C50 OS=Mus musculus GN=Cyp2c50 PE=1 SV=1	94	15	0.16	10	31	29	13	2	4	5	1	2	5	4	0	1	2	4.057	5.642	12.094	10.686	0	2.25	4	8.72243	3.556	9.01343	19.6694	1.05957	1.75	2.42857	6.59992	TRUE	FALSE	4	3	TRUE	10.2403	1.74605	2.5521	3.01012
723	1	THOC7_MOUSE	THOC7_MOUSE		49.5	204	23716	THO complex subunit 7 homolog OS=Mus musculus GN=Thoc7 PE=1 SV=2	50	50	1	2	8	8	2	3	8	19	2	8	8	2	3	8	19	2	8	8	2	3	8	19	4.14286	5.523	5.85714	6.47614	6	6.42857	11.6796	6.58676	TRUE	TRUE	4	3	TRUE	5.49979	8.03605	-0.547111	-0.81166
184	1	RS16_MOUSE	RS16_MOUSE		39	146	16446	40S ribosomal protein S16 OS=Mus musculus GN=Rps16 PE=2 SV=4	50	50	1	3	7	14	2	2	15	7	3	7	14	2	2	15	7	3	7	14	2	2	15	7	5.37143	4.28571	10.1429	5.85714	4.08329	11.916	4.14286	6.54276	TRUE	TRUE	4	3	TRUE	6.41429	6.71405	-0.0658942	-0.309014
300	1	FMO1_MOUSE	FMO1_MOUSE		28.9	532	59916	Dimethylaniline monooxygenase [N-oxide-forming] 1 OS=Mus musculus GN=Fmo1 PE=1 SV=1	58	58	1	1	24	9	1	0	11	12	1	24	9	1	0	11	12	1	24	9	1	0	11	12	2	18.2369	6.42857	3.48057	0	8.72729	6.85714	6.53292	TRUE	TRUE	4	2	TRUE	7.5365	5.19481	0.536824	0.371168
1220	1	LLPH_MOUSE	LLPH_MOUSE		21.5	130	15392	Protein LLP homolog OS=Mus musculus GN=Llph PE=2 SV=1	55	55	1	0	12	17	0	0	7	19	0	12	17	0	0	7	19	0	12	17	0	0	7	19	1.29243	9.24114	13.169	2.28571	1.42857	5.92857	12.2857	6.51873	TRUE	TRUE	2	2	TRUE	6.49707	6.54762	-0.0111808	-0.280428
920	1	MTA1_MOUSE	MTA1_MOUSE		27	715	80799	Metastasis-associated protein MTA1 OS=Mus musculus GN=Mta1 PE=1 SV=1	74	30	0.405	10	19	14	1	5	8	17	7	6	5	0	3	2	7	8.137	10.636	7.461	0	3.15	3.524	12.773	14.3053	7.51943	5.523	1.24229	7.02	2.57486	7.44086	6.51796	TRUE	TRUE	4	3	TRUE	7.1475	5.67857	0.331911	0.217162
845	1	IWS1_MOUSE	IWS1_MOUSE		14	766	85249	Protein IWS1 homolog OS=Mus musculus GN=Iws1 PE=1 SV=1	45	45	1	1	8	10	3	4	7	12	1	8	10	3	4	7	12	1	8	10	3	4	7	12	2.511	5.85714	7.28571	9	7.57143	5.85714	7.28571	6.48116	TRUE	TRUE	4	3	TRUE	6.16346	6.90476	-0.16385	-0.415656
767	1	PCID2_MOUSE	PCID2_MOUSE		23.8	399	46133	PCI domain-containing protein 2 OS=Mus musculus GN=Pcid2 PE=2 SV=1	40	40	1	4	11	5	3	5	6	6	4	11	5	3	5	6	6	4	11	5	3	5	6	6	7.57143	8	3.64286	9	9	4.66671	3.426	6.47243	TRUE	TRUE	4	3	TRUE	7.05357	5.69757	0.308007	0.148201
51	1	ARI1A_MOUSE	ARI1A_MOUSE		15.2	2283	242093	AT-rich interactive domain-containing protein 1A OS=Mus musculus GN=Arid1a PE=1 SV=1	53	53	1	4	10	4	0	5	15	15	4	10	4	0	5	15	15	4	10	4	0	5	15	15	6.85714	6.57143	2.42857	0	8.42857	11.8571	8.948	6.44155	TRUE	TRUE	3	3	TRUE	3.96429	9.74457	-1.29754	-1.8672
1171	1	RL15_MOUSE	RL15_MOUSE		23	204	24147	60S ribosomal protein L15 OS=Mus musculus GN=Rpl15 PE=2 SV=4	51	51	1	0	14	8	1	0	14	14	0	14	8	1	0	14	14	0	14	8	1	0	14	14	1.14886	10.9543	6.07257	4.85714	1.30686	11.5714	8.78571	6.38527	TRUE	TRUE	3	2	TRUE	5.75821	7.22133	-0.326644	-0.647165
693	1	BUD31_MOUSE	BUD31_MOUSE		48.5	103	11906	Protein BUD31 homolog OS=Mus musculus GN=Bud31 PE=2 SV=1	42	42	1	5	11	8	3	1	5	9	5	11	8	3	1	5	9	5	11	8	3	1	5	9	9.71429	8	5.85714	9	2.62929	4.14286	5.35271	6.38518	TRUE	TRUE	4	3	TRUE	8.14286	4.04162	1.0106	0.95118
1339	1	SC11A_MOUSE	SC11A_MOUSE		15.6	179	20627	Signal peptidase complex catalytic subunit SEC11A OS=Mus musculus GN=Sec11a PE=2 SV=1	41	41	1	1	17	7	5	0	6	5	1	17	7	5	0	6	5	1	17	7	5	0	6	5	3.19043	13.4486	5.42857	12.9664	1.78571	4.89614	2.85714	6.36757	TRUE	TRUE	4	2	TRUE	8.7585	3.17967	1.46181	1.88461
370	1	RS18_MOUSE	RS18_MOUSE		32.2	152	17720	40S ribosomal protein S18 OS=Mus musculus GN=Rps18 PE=2 SV=3	35	35	1	6	10	3	5	5	6	0	6	10	3	5	5	6	0	6	10	3	5	5	6	0	10.8571	6.85714	1.78571	11.6796	8.72729	4.57143	0	6.35404	TRUE	TRUE	4	2	TRUE	7.79489	4.4329	0.814277	0.923621
133	1	COMT_MOUSE	COMT_MOUSE		24.2	265	29497	Catechol O-methyltransferase OS=Mus musculus GN=Comt PE=1 SV=1	57	57	1	0	10	20	0	2	15	10	0	10	20	0	2	15	10	0	10	20	0	2	15	10	0	6.652	16.0944	0	3.98986	11.8571	5.85714	6.35008	TRUE	TRUE	2	3	TRUE	5.68661	7.23471	-0.347368	-0.618846
996	1	TAF9_MOUSE	TAF9_MOUSE		28	264	28980	Transcription initiation factor TFIID subunit 9 OS=Mus musculus GN=Taf9 PE=2 SV=1	43	43	1	5	6	5	1	3	5	18	5	6	5	1	3	5	18	5	6	5	1	3	5	18	10.092	4.14286	3.724	4.57143	6.42857	4.14286	11.2756	6.33961	TRUE	TRUE	4	3	TRUE	5.63257	7.28233	-0.370607	-0.542438
1144	1	CD2B2_MOUSE	CD2B2_MOUSE		28.1	342	37695	CD2 antigen cytoplasmic tail-binding protein 2 OS=Mus musculus GN=Cd2bp2 PE=1 SV=1	40	40	1	6	6	6	1	3	8	10	6	6	6	1	3	8	10	6	6	6	1	3	8	10	11.5714	4.14286	4.57143	4.76	6.42857	6.652	6.04757	6.31055	TRUE	TRUE	4	3	TRUE	6.26143	6.37605	-0.0261706	-0.138584
100	1	SP100_MOUSE	SP100_MOUSE		15.6	482	54841	Nuclear autoantigen Sp-100 OS=Mus musculus GN=Sp100 PE=1 SV=1	52	52	1	2	14	16	1	2	6	11	2	14	16	1	2	6	11	2	14	16	1	2	6	11	3.60957	10.4286	11.8571	3.14357	3.90443	4.57143	6.28571	6.2572	TRUE	TRUE	4	3	TRUE	7.25971	4.92052	0.561101	0.653127
905	1	TF3C1_MOUSE	TF3C1_MOUSE		15.9	2101	237477	General transcription factor 3C polypeptide 1 OS=Mus musculus GN=Gtf3c1 PE=2 SV=2	40	40	1	6	9	2	1	5	6	11	6	9	2	1	5	6	11	6	9	2	1	5	6	11	11.2857	6.23814	1.32143	4.57143	9.19043	4.71429	6.46	6.25449	TRUE	TRUE	4	3	TRUE	5.85418	6.78824	-0.21357	-0.352812
450	1	RL19_MOUSE	RL19_MOUSE		13.3	196	23467	60S ribosomal protein L19 OS=Mus musculus GN=Rpl19 PE=1 SV=1	37	37	1	6	10	5	4	3	4	5	6	10	5	4	3	4	5	6	10	5	4	3	4	5	11	6.85714	3.53371	10.7029	5.85714	2.85714	2.85714	6.23788	TRUE	TRUE	4	3	TRUE	8.02343	3.85714	1.05669	1.2773
730	1	EXOS3_MOUSE	EXOS3_MOUSE		36.9	274	29547	Exosome complex exonuclease RRP40 OS=Mus musculus GN=Exosc3 PE=2 SV=3	43	43	1	5	6	8	0	7	8	9	5	6	8	0	7	8	9	5	6	8	0	7	8	9	9.71429	4.052	5.85714	0.857143	11.2197	6.42857	5.39986	6.21839	TRUE	TRUE	3	3	TRUE	5.12014	7.68271	-0.585432	-0.915299
729	1	INT7_MOUSE	INT7_MOUSE		15.4	966	106862	Integrator complex subunit 7 OS=Mus musculus GN=Ints7 PE=1 SV=1	41	41	1	3	3	7	1	9	10	8	3	3	7	1	9	10	8	3	3	7	1	9	10	8	6	1.42857	5.294	4.14286	14	8.00929	4.57143	6.20659	TRUE	TRUE	4	3	TRUE	4.21636	8.86024	-1.07135	-1.41182
708	1	NAA38_MOUSE	NAA38_MOUSE		35.4	96	10404	N-alpha-acetyltransferase 38, NatC auxiliary subunit OS=Mus musculus GN=Naa38 PE=2 SV=3	33	33	1	4	4	7	8	5	2	3	4	4	7	8	5	2	3	4	4	7	8	5	2	3	7.555	2.28571	5.28914	16.4286	9	1.35614	1.42857	6.19188	TRUE	TRUE	4	3	TRUE	7.88961	3.92824	1.00607	1.34823
663	1	NIPBL_MOUSE	NIPBL_MOUSE		7.8	2798	315451	Nipped-B-like protein OS=Mus musculus GN=Nipbl PE=1 SV=1	53	53	1	0	15	17	1	0	9	11	0	15	17	1	0	9	11	0	15	17	1	0	9	11	0.428571	11.5714	12.8571	4.14286	0.571429	7.28571	6.42857	6.18367	TRUE	TRUE	3	2	TRUE	7.25	4.7619	0.606442	1.03768
949	1	RBM19_MOUSE	RBM19_MOUSE		16.6	952	106084	Probable RNA-binding protein 19 OS=Mus musculus GN=Rbm19 PE=1 SV=1	46	46	1	2	5	13	0	7	7	12	2	5	13	0	7	7	12	2	5	13	0	7	7	12	4.28571	2.85714	9.71429	1.36514	11.5714	5.85714	7.28571	6.1338	TRUE	TRUE	3	3	TRUE	4.55557	8.2381	-0.854679	-1.08613
542	1	WDR18_MOUSE	WDR18_MOUSE		25.5	431	47212	WD repeat-containing protein 18 OS=Mus musculus GN=Wdr18 PE=2 SV=1	51	51	1	1	11	10	0	5	7	17	1	11	10	0	5	7	17	1	11	10	0	5	7	17	2.28571	8	7.28571	0.428571	8.79786	5.43229	10.6379	6.124	TRUE	TRUE	3	3	TRUE	4.5	8.28933	-0.881331	-1.1618
719	1	SND1_MOUSE	SND1_MOUSE		18.5	910	102089	Staphylococcal nuclease domain-containing protein 1 OS=Mus musculus GN=Snd1 PE=1 SV=1	38	38	1	5	7	6	4	1	8	7	5	7	6	4	1	8	7	5	7	6	4	1	8	7	9.71429	4.57143	4.28571	10.8571	2.85714	6.42857	4.14286	6.12245	TRUE	TRUE	4	3	TRUE	7.35714	4.47619	0.716874	1.20147
1382	1	MBD1_MOUSE	MBD1_MOUSE		8.5	636	70024	Methyl-CpG-binding domain protein 1 OS=Mus musculus GN=Mbd1 PE=1 SV=2	44	44	1	1	11	8	0	3	10	11	1	11	8	0	3	10	11	1	11	8	0	3	10	11	3.28571	8.42857	6.28571	2.85714	6.92857	8.46429	6.57143	6.11735	TRUE	TRUE	3	3	TRUE	5.21429	7.32143	-0.489656	-0.459715
1347	1	KHDR3_MOUSE	KHDR3_MOUSE		13.9	346	38808	KH domain-containing, RNA-binding, signal transduction-associated protein 3 OS=Mus musculus GN=Khdrbs3 PE=1 SV=1	38	35	0.921	2	11	4	4	4	6	7	2	10	4	4	3	6	6	2	10.5	4	4	3.15	6	6.429	4.85714	7.5	2.85714	11.2857	7.02143	4.982	3.98986	6.07047	TRUE	TRUE	4	3	TRUE	6.625	5.3311	0.313488	0.69664
458	1	RS5_MOUSE	RS5_MOUSE		15.7	204	22890	40S ribosomal protein S5 OS=Mus musculus GN=Rps5 PE=2 SV=3	50	50	1	3	12	11	0	2	10	12	3	12	11	0	2	10	12	3	12	11	0	2	10	12	5.85714	8.948	8	0.285714	4.14286	8	7.02143	6.03645	TRUE	TRUE	3	3	TRUE	5.77271	6.3881	-0.146136	0.0261344
1027	1	THYN1_MOUSE	THYN1_MOUSE		31.9	226	26179	Thymocyte nuclear protein 1 OS=Mus musculus GN=Thyn1 PE=1 SV=1	55	55	1	0	15	10	0	0	4	26	0	15	10	0	0	4	26	0	15	10	0	0	4	26	1	11.5714	7.47957	1.42857	1.07143	3.11729	16.4286	6.01384	TRUE	TRUE	2	2	TRUE	5.36989	6.87243	-0.355927	-0.278721
919	1	DPOLB_MOUSE	DPOLB_MOUSE		23.3	335	38289	DNA polymerase beta OS=Mus musculus GN=Polb PE=2 SV=3	46	46	1	0	8	5	1	4	9	19	0	8	5	1	4	9	19	0	8	5	1	4	9	19	0.857143	5.85714	3.71229	4.57143	7.64086	7.28571	12.14	6.00922	TRUE	TRUE	3	3	TRUE	3.7495	9.02219	-1.26678	-1.57623
508	1	ALKB5_MOUSE	ALKB5_MOUSE		18.7	395	44412	Probable alpha-ketoglutarate-dependent dioxygenase ABH5 OS=Mus musculus GN=Alkbh5 PE=1 SV=2	41	41	1	8	3	6	0	8	3	13	8	3	6	0	8	3	13	8	3	6	0	8	3	13	13.7659	1.42857	4.14286	0.285714	12.4066	2.25	7.70357	5.99759	TRUE	TRUE	3	3	TRUE	4.90575	7.45338	-0.603421	-0.782101
1121	1	PCYOX_MOUSE	PCYOX_MOUSE		24.2	505	56496	Prenylcysteine oxidase OS=Mus musculus GN=Pcyox1 PE=1 SV=1	47	47	1	2	11	11	0	2	5	16	2	11	11	0	2	5	16	2	11	11	0	2	5	16	4.57143	8.19643	8.05114	1.91157	4.71429	4.20886	10.1429	5.97094	TRUE	TRUE	3	3	TRUE	5.68264	6.35533	-0.161406	-0.0947376
1115	1	NCBP2_MOUSE	NCBP2_MOUSE		30.1	156	18018	Nuclear cap-binding protein subunit 2 OS=Mus musculus GN=Ncbp2 PE=1 SV=1	37	37	1	4	7	10	2	3	4	7	4	7	10	2	3	4	7	4	7	10	2	3	4	7	8.00929	4.602	7.555	7.28571	6.42857	3.26686	4.26529	5.9161	TRUE	TRUE	4	3	TRUE	6.863	4.65357	0.560501	1.06981
1166	1	LUC7L_MOUSE	LUC7L_MOUSE		23.5	371	43935	Putative RNA-binding protein Luc7-like 1 OS=Mus musculus GN=Luc7l PE=2 SV=2	62	21	0.339	3	12	19	4	6	7	11	2	4	3	2	5	4	1	2.4	6.462	8.333	3	5.833	5.5	3.5	5.2	4.20886	6.33329	9.28571	9.65471	4.47143	2.21429	5.90976	TRUE	TRUE	4	3	TRUE	6.25696	5.44681	0.200051	0.485172
1297	1	RCL1_MOUSE	RCL1_MOUSE		28.7	373	40842	RNA 3'-terminal phosphate cyclase-like protein OS=Mus musculus GN=Rcl1 PE=2 SV=1	42	42	1	2	8	5	0	4	8	15	2	8	5	0	4	8	15	2	8	5	0	4	8	15	4.71429	5.85714	3.87214	2.61571	8	6.85714	9.40471	5.90302	TRUE	TRUE	3	3	TRUE	4.26482	8.08729	-0.92317	-1.35728
681	1	DDX51_MOUSE	DDX51_MOUSE		29.7	639	70369	ATP-dependent RNA helicase DDX51 OS=Mus musculus GN=Ddx51 PE=2 SV=1	50	50	1	1	6	14	0	3	10	16	1	6	14	0	3	10	16	1	6	14	0	3	10	16	2.28571	3.98986	10.5546	0.714286	5.92857	8	9.73657	5.88708	TRUE	TRUE	3	3	TRUE	4.38611	7.88838	-0.846788	-1.09179
1091	1	CV028_MOUSE	CV028_MOUSE		19.6	505	55250	UPF0027 protein C22orf28 homolog OS=Mus musculus GN=D10Wsu52e PE=2 SV=1	41	41	1	3	9	10	1	2	8	8	3	9	10	1	2	8	8	3	9	10	1	2	8	8	6.42857	6.42857	7.5	4.71429	4.71429	6.54943	4.59114	5.84661	TRUE	TRUE	4	3	TRUE	6.26786	5.28495	0.246082	0.674155
337	1	AAAS_MOUSE	AAAS_MOUSE		28.4	546	59432	Aladin OS=Mus musculus GN=Aaas PE=1 SV=1	50	50	1	1	11	10	2	0	8	18	1	11	10	2	0	8	18	1	11	10	2	0	8	18	2.16886	7.91429	7.28571	6.06457	0	6.27571	11	5.81559	TRUE	TRUE	4	2	TRUE	5.85836	5.75857	0.0247852	0.366507
842	1	P20D1_MOUSE	P20D1_MOUSE		30.2	503	55664	Probable carboxypeptidase PM20D1 OS=Mus musculus GN=Pm20d1 PE=2 SV=1	41	41	1	5	18	4	1	0	5	8	5	18	4	1	0	5	8	5	18	4	1	0	5	8	9.74457	14	2.85714	4.28571	0.857143	4.14286	4.57143	5.77984	TRUE	TRUE	4	2	TRUE	7.72186	3.19048	1.27518	2.27522
391	1	RS25_MOUSE	RS25_MOUSE		22.4	125	13743	40S ribosomal protein S25 OS=Mus musculus GN=Rps25 PE=2 SV=1	30	30	1	10	5	2	3	5	3	2	10	5	2	3	5	3	2	10	5	2	3	5	3	2	16.4286	2.85714	1.14286	8.24914	8.74286	2.17143	0.857143	5.77845	TRUE	TRUE	4	3	TRUE	7.16943	3.92381	0.869603	1.61615
1173	1	RS19_MOUSE	RS19_MOUSE		27.6	145	16086	40S ribosomal protein S19 OS=Mus musculus GN=Rps19 PE=1 SV=3	42	42	1	2	8	12	0	3	8	9	2	8	12	0	3	8	9	2	8	12	0	3	8	9	4.57143	5.85714	9	2.25	6.47614	6.68943	5.555	5.77131	TRUE	TRUE	3	3	TRUE	5.41964	6.24019	-0.203392	-0.27129
1369	1	ADNP_MOUSE	ADNP_MOUSE		17.9	828	92064	Activity-dependent neuroprotector homeobox protein OS=Mus musculus GN=Adnp PE=2 SV=1	33	33	1	4	5	6	1	5	5	7	4	5	6	1	5	5	7	4	5	6	1	5	5	7	8.71429	3.29914	4.57143	5.42857	9.42857	4.28571	4.33043	5.72259	TRUE	TRUE	4	3	TRUE	5.50336	6.0149	-0.12823	-0.136879
1207	1	EXOS8_MOUSE	EXOS8_MOUSE		45.3	276	29950	Exosome complex exonuclease RRP43 OS=Mus musculus GN=Exosc8 PE=2 SV=1	37	37	1	3	7	6	1	3	11	6	3	7	6	1	3	11	6	3	7	6	1	3	11	6	6.47614	4.71429	4.57143	4.982	6.57143	9	3.73214	5.72106	TRUE	TRUE	4	3	TRUE	5.18596	6.43452	-0.311221	-0.421311
697	1	VKORL_MOUSE	VKORL_MOUSE		17	176	19780	Vitamin K epoxide reductase complex subunit 1-like protein 1 OS=Mus musculus GN=Vkorc1l1 PE=2 SV=1	48	48	1	0	7	16	1	1	7	16	0	7	16	1	1	7	16	0	7	16	1	1	7	16	0.571429	4.57143	12.2857	4.14286	2.8	5.555	9.73814	5.66637	TRUE	TRUE	3	3	TRUE	5.39286	6.03105	-0.161359	-0.154805
366	1	RS15A_MOUSE	RS15A_MOUSE		20	130	14841	40S ribosomal protein S15a OS=Mus musculus GN=Rps15a PE=2 SV=2	42	42	1	2	8	6	2	3	12	9	2	8	6	2	3	12	9	2	8	6	2	3	12	9	3.91671	5.39986	4.14286	6.14286	5.85714	9.28571	4.89614	5.66304	TRUE	TRUE	4	3	TRUE	4.90057	6.67967	-0.446826	-0.572457
38	1	DHX8_MOUSE	DHX8_MOUSE		16.4	1244	142573	ATP-dependent RNA helicase DHX8 OS=Mus musculus GN=Dhx8 PE=2 SV=1	90	43	0.478	2	16	19	5	4	21	23	1	4	12	0	2	10	14	1.033	4.738	13.012	0	2.118	11.375	15.518	3.29043	2.62929	9.74457	0	5.30257	9.12214	9.51886	5.65827	TRUE	TRUE	4	3	TRUE	3.91607	7.98119	-1.0272	-1.58157
1003	1	PQBP1_MOUSE	PQBP1_MOUSE		27	263	30598	Polyglutamine-binding protein 1 OS=Mus musculus GN=Pqbp1 PE=2 SV=1	45	45	1	0	7	12	1	2	7	16	0	7	12	1	2	7	16	0	7	12	1	2	7	16	1	4.57143	8.93114	4.57143	4.57143	5.85714	10.092	5.65637	TRUE	TRUE	3	3	TRUE	4.7685	6.84019	-0.520501	-0.916464
1380	1	MBD3_MOUSE	MBD3_MOUSE		19.3	285	32169	Methyl-CpG-binding domain protein 3 OS=Mus musculus GN=Mbd3 PE=1 SV=1	40	40	1	0	11	7	1	2	8	11	0	11	7	1	2	8	11	0	11	7	1	2	8	11	1.57143	8.42857	5.42857	5.42857	5.2	6.85714	6.54943	5.63767	TRUE	TRUE	3	3	TRUE	5.21429	6.20219	-0.250308	-0.512832
716	1	RPA34_MOUSE	RPA34_MOUSE		27.8	399	43083	DNA-directed RNA polymerase I subunit RPA34 OS=Mus musculus GN=Cd3eap PE=1 SV=2	35	35	1	5	11	6	1	5	2	5	5	11	6	1	5	2	5	5	11	6	1	5	2	5	9.71429	8	4.28571	4.14286	9	1.35714	2.85714	5.62245	TRUE	TRUE	4	3	TRUE	6.53571	4.40476	0.569281	0.70558
821	1	CPSF7_MOUSE	CPSF7_MOUSE		15.1	471	52012	Cleavage and polyadenylation specificity factor subunit 7 OS=Mus musculus GN=Cpsf7 PE=1 SV=2	33	33	1	5	3	9	1	8	3	4	5	3	9	1	8	3	4	5	3	9	1	8	3	4	9.73657	1.42857	6.54943	4.28571	12.6984	2.28571	2.347	5.61878	TRUE	TRUE	4	3	TRUE	5.50007	5.77705	-0.070882	-0.185137
78	1	RL21_MOUSE	RL21_MOUSE		27.5	160	18563	60S ribosomal protein L21 OS=Mus musculus GN=Rpl21 PE=2 SV=3	35	35	1	9	4	6	4	1	0	11	9	4	6	4	1	0	11	9	4	6	4	1	0	11	14.5191	2	4.14286	10.1034	2.18186	0	6.28571	5.60471	TRUE	TRUE	4	2	TRUE	7.69136	2.82252	1.44625	2.32765
1033	1	PTBP2_MOUSE	PTBP2_MOUSE		29.8	531	57490	Polypyrimidine tract-binding protein 2 OS=Mus musculus GN=Ptbp2 PE=1 SV=2	164	46	0.28	21	17	27	25	24	22	28	0	7	12	0	1	13	13	0	7.266	12.75	0	1.068	13.755	13.668	1	4.89514	9.19043	1.42857	3.724	10.8221	8.11257	5.59612	TRUE	FALSE	4	3	TRUE	4.12854	7.5529	-0.871401	-1.24919
1301	1	MBNL1_MOUSE	MBNL1_MOUSE		17.9	341	36977	Muscleblind-like protein 1 OS=Mus musculus GN=Mbnl1 PE=1 SV=1	43	43	1	2	11	9	0	0	8	13	2	11	9	0	0	8	13	2	11	9	0	0	8	13	4.71429	8.36629	6.92857	2.8	1.43871	6.85714	8	5.58643	TRUE	TRUE	3	2	TRUE	5.70229	5.43195	0.0700695	0.191474
1217	1	RL7L_MOUSE	RL7L_MOUSE		16.7	246	28545	60S ribosomal protein L7-like 1 OS=Mus musculus GN=Rpl7l1 PE=2 SV=1	45	45	1	1	12	9	0	0	12	11	1	12	9	0	0	12	11	1	12	9	0	0	12	11	2.85714	9.23814	6.83329	2.28571	1.42857	9.73814	6.51943	5.5572	TRUE	TRUE	3	2	TRUE	5.30357	5.89538	-0.152621	-0.0954242
649	1	WAPL_MOUSE	WAPL_MOUSE		16.3	1200	134057	Wings apart-like protein homolog OS=Mus musculus GN=Wapal PE=1 SV=1	38	38	1	5	7	6	1	3	6	10	5	7	6	1	3	6	10	5	7	6	1	3	6	10	9.51886	4.57143	4.25714	4.14286	5.85714	4.57143	5.85714	5.53943	TRUE	TRUE	4	3	TRUE	5.62257	5.42857	0.0506575	0.207988
703	1	ZC3H4_MOUSE	ZC3H4_MOUSE		18	1304	140968	Zinc finger CCCH domain-containing protein 4 OS=Mus musculus GN=Zc3h4 PE=1 SV=2	37	37	1	4	10	5	1	3	10	4	4	10	5	1	3	10	4	4	10	5	1	3	10	4	7.51943	7.19043	3.60957	4.14286	5.92857	8	2.33329	5.53202	TRUE	TRUE	4	3	TRUE	5.61557	5.42062	0.0509752	0.146204
1083	1	DHRS1_MOUSE	DHRS1_MOUSE		28.8	313	34006	Dehydrogenase/reductase SDR family member 1 OS=Mus musculus GN=Dhrs1 PE=2 SV=1	34	34	1	4	7	7	2	2	7	5	4	7	7	2	2	7	5	4	7	7	2	2	7	5	8	4.59114	5.40814	7.28571	4.71071	5.85714	2.85714	5.53	TRUE	TRUE	4	3	TRUE	6.32125	4.475	0.498322	0.724316
248	1	DESM_MOUSE	DESM_MOUSE		21.7	469	53499	Desmin OS=Mus musculus GN=Des PE=1 SV=3	61	26	0.426	14	10	10	6	6	4	11	9	3	5	1	1	1	6	11.045	3.373	5.535	1.2	1.261	1.046	6.439	18.4156	1.91043	3.99629	5.49557	3.75157	1.00657	3.99629	5.51033	TRUE	TRUE	4	3	TRUE	7.45446	2.91814	1.35305	1.93948
709	1	RS9_MOUSE	RS9_MOUSE		22.7	194	22592	40S ribosomal protein S9 OS=Mus musculus GN=Rps9 PE=2 SV=3	43	43	1	0	10	12	1	3	9	8	0	10	12	1	3	9	8	0	10	12	1	3	9	8	0.571429	7.24486	8.72729	4.14286	5.98057	7.28571	4.57143	5.50345	TRUE	TRUE	3	3	TRUE	5.17161	5.9459	-0.201284	-0.393728
809	1	TF3C4_MOUSE	TF3C4_MOUSE		14	817	91653	General transcription factor 3C polypeptide 4 OS=Mus musculus GN=Gtf3c4 PE=1 SV=1	34	34	1	5	8	3	2	2	6	8	5	8	3	2	2	6	8	5	8	3	2	2	6	8	9.72071	5.64871	2.23557	6.83329	4.57143	4.71071	4.57143	5.47027	TRUE	TRUE	4	3	TRUE	6.10957	4.61786	0.403848	0.525189
239	1	CEBPB_MOUSE	CEBPB_MOUSE		35.5	296	31447	CCAAT/enhancer-binding protein beta OS=Mus musculus GN=Cebpb PE=1 SV=1	31	31	1	7	5	5	2	6	4	2	7	5	5	2	6	4	2	7	5	5	2	6	4	2	12.2857	2.85714	3.28571	5.92857	9.71429	2.85714	0.857143	5.39796	TRUE	TRUE	4	3	TRUE	6.08929	4.47619	0.444002	0.55194
259	1	FOXA2_MOUSE	FOXA2_MOUSE		10.7	459	48475	Hepatocyte nuclear factor 3-beta OS=Mus musculus GN=Foxa2 PE=1 SV=1	48	48	1	1	8	8	0	2	16	13	1	8	8	0	2	16	13	1	8	8	0	2	16	13	1.97957	5.30257	5.85714	0	4.14286	12.8571	7.51943	5.37982	TRUE	TRUE	3	3	TRUE	3.28482	8.17314	-1.31508	-2.06723
754	1	DDX10_MOUSE	DDX10_MOUSE		14.9	875	100740	Probable ATP-dependent RNA helicase DDX10 OS=Mus musculus GN=Ddx10 PE=1 SV=2	39	39	1	4	5	6	0	6	6	12	4	5	6	0	6	6	12	4	5	6	0	6	6	12	7.57143	2.85714	4.28571	0.857143	10.092	4.602	7.28571	5.36445	TRUE	TRUE	3	3	TRUE	3.89286	7.32657	-0.912309	-1.39953
523	1	RREB1_MOUSE	RREB1_MOUSE		11.1	1700	184155	Ras-responsive element-binding protein 1 OS=Mus musculus GN=Rreb1 PE=1 SV=2	40	40	1	4	6	7	0	4	11	8	4	6	7	0	4	11	8	4	6	7	0	4	11	8	7.28571	3.85714	5.17186	0.428571	7.28571	8.93114	4.57143	5.36165	TRUE	TRUE	3	3	TRUE	4.18582	6.92943	-0.727226	-1.18547
1190	1	RRP7A_MOUSE	RRP7A_MOUSE		32.5	280	32400	Ribosomal RNA-processing protein 7 homolog A OS=Mus musculus GN=Rrp7a PE=2 SV=1	43	43	1	2	7	9	0	0	11	14	2	7	9	0	0	11	14	2	7	9	0	0	11	14	4.57143	4.71071	6.8	2.28571	1.366	9	8.78571	5.35994	TRUE	TRUE	3	2	TRUE	4.59196	6.3839	-0.475328	-0.834813
1131	1	NSA2_MOUSE	NSA2_MOUSE		21.9	260	30037	Ribosome biogenesis protein NSA2 homolog OS=Mus musculus GN=Nsa2 PE=2 SV=1	34	34	1	0	8	4	6	0	9	7	0	8	4	6	0	9	7	0	8	4	6	0	9	7	1.14286	5.85714	2.85714	14.2234	1.19043	7.5	4.28571	5.29382	TRUE	TRUE	3	2	TRUE	6.02014	4.32538	0.476971	0.346709
853	1	RBM4_MOUSE	RBM4_MOUSE		36.8	361	40047	RNA-binding protein 4 OS=Mus musculus GN=Rbm4 PE=2 SV=1	64	10	0.156	3	18	10	1	5	12	15	0	5	1	0	2	0	2	0	15.833	10	0	5	0	10.667	0.857143	12.2619	7.31614	1.14286	9.145	0	6.23814	5.28016	TRUE	FALSE	4	3	TRUE	5.3945	5.12771	0.0731734	-0.124685
412	1	DYL1_MOUSE	DYL1_MOUSE		49.4	89	10367	Dynein light chain 1, cytoplasmic OS=Mus musculus GN=Dynll1 PE=1 SV=1	47	25	0.532	6	6	6	4	4	7	14	6	3	2	2	4	4	4	6	3.563	2.5	2.2	4	4.632	6.105	10.9543	1.93757	1.5	7.70357	7.28571	3.66171	3.87214	5.27357	TRUE	TRUE	4	3	TRUE	5.52386	4.93986	0.161207	0.0179734
937	1	ZN830_MOUSE	ZN830_MOUSE		32.5	363	40659	Zinc finger protein 830 OS=Mus musculus GN=Znf830 PE=1 SV=1	27	27	1	7	4	3	2	3	5	3	7	4	3	2	3	5	3	7	4	3	2	3	5	3	12.855	2.28571	2.28571	7.25	6.23814	4.14286	1.73586	5.25618	TRUE	TRUE	4	3	TRUE	6.16911	4.03895	0.611081	0.680527
270	1	NR2F6_MOUSE	NR2F6_MOUSE		34.6	390	41983	Nuclear receptor subfamily 2 group F member 6 OS=Mus musculus GN=Nr2f6 PE=1 SV=1	43	42	0.977	2	7	10	2	1	4	17	2	7	10	2	1	4	16	2	7	10	2	1	4	16.727	3.76186	4.28571	7.28571	6	2.28571	2.85714	10.2467	5.24612	TRUE	TRUE	4	3	TRUE	5.33332	5.12986	0.0561156	-0.0604829
351	1	RL26_MOUSE	RL26_MOUSE		22.8	145	17259	60S ribosomal protein L26 OS=Mus musculus GN=Rpl26 PE=2 SV=1	43	43	1	0	13	10	2	1	7	10	0	13	10	2	1	7	10	0	13	10	2	1	7	10	0	9.71429	7.28571	6.14286	2.28571	5.39986	5.85714	5.2408	TRUE	TRUE	3	3	TRUE	5.78571	4.51424	0.358013	0.088023
1095	1	DPY30_MOUSE	DPY30_MOUSE		29.3	99	11214	Protein dpy-30 homolog OS=Mus musculus GN=Dpy30 PE=2 SV=1	29	29	1	4	5	5	5	1	4	5	4	5	5	5	1	4	5	4	5	5	5	1	4	5	8	3.14357	3.73214	12.8571	2.85714	3.14357	2.85714	5.22724	TRUE	TRUE	4	3	TRUE	6.93321	2.95262	1.23153	0.820712
568	1	NR1H4_MOUSE	NR1H4_MOUSE		21.9	488	56037	Bile acid receptor OS=Mus musculus GN=Nr1h4 PE=1 SV=2	30	30	1	5	9	6	5	1	2	2	5	9	6	5	1	2	2	5	9	6	5	1	2	2	9.42857	6.07143	4.22443	12.2857	2.41171	1.28571	0.864571	5.22459	TRUE	TRUE	4	3	TRUE	8.00254	1.52067	2.39575	1.89285
1157	1	TECR_MOUSE	TECR_MOUSE		11.7	308	36091	Trans-2,3-enoyl-CoA reductase OS=Mus musculus GN=Tecr PE=1 SV=1	40	40	1	0	7	13	2	0	5	13	0	7	13	2	0	5	13	0	7	13	2	0	5	13	1.14286	4.66671	9.72071	7.31614	1.28571	4.25	8	5.19745	TRUE	TRUE	3	2	TRUE	5.71161	4.5119	0.34016	-0.0415486
893	1	ACSL5_MOUSE	ACSL5_MOUSE		21.1	683	76207	Long-chain-fatty-acid--CoA ligase 5 OS=Mus musculus GN=Acsl5 PE=2 SV=1	92	23	0.25	7	17	16	7	13	13	19	2	8	1	0	3	3	6	4.5	9.846	1.246	0	6.333	4.111	8.438	8.78571	6.54943	0.892286	1.14286	10.6379	3.53371	4.77686	5.18839	TRUE	FALSE	4	3	TRUE	4.34257	6.31614	-0.540494	-0.955829
220	1	TCEA3_MOUSE	TCEA3_MOUSE		17.6	347	38851	Transcription elongation factor A protein 3 OS=Mus musculus GN=Tcea3 PE=1 SV=3	30	30	1	3	2	4	4	7	4	6	3	2	4	4	7	4	6	3	2	4	4	7	4	6	5.42857	0.760429	2.565	10.2857	10.8571	2.85714	3.28571	5.14853	TRUE	TRUE	4	3	TRUE	4.75993	5.66667	-0.25156	-0.708052
849	1	RBM34_MOUSE	RBM34_MOUSE		33.3	375	41327	RNA-binding protein 34 OS=Mus musculus GN=Rbm34 PE=1 SV=1	33	33	1	8	3	3	0	3	8	8	8	3	3	0	3	8	8	8	3	3	0	3	8	8	14	1.42857	2.25	1.12857	6.07257	6.42857	4.57143	5.12567	TRUE	TRUE	3	3	TRUE	4.70179	5.69086	-0.275437	-0.739883
791	1	CARF_MOUSE	CARF_MOUSE		27.7	563	59746	CDKN2A-interacting protein OS=Mus musculus GN=Cdkn2aip PE=2 SV=1	30	30	1	5	5	4	1	7	2	6	5	5	4	1	7	2	6	5	5	4	1	7	2	6	9.71429	2.85714	2.85714	4.25	11.2756	1.42857	3.48057	5.12333	TRUE	TRUE	4	3	TRUE	4.91964	5.3949	-0.133044	-0.54983
1206	1	CS043_MOUSE	CS043_MOUSE		21.4	173	18378	Uncharacterized protein C19orf43 homolog OS=Mus musculus PE=2 SV=1	28	28	1	4	5	5	1	5	5	3	4	5	5	1	5	5	3	4	5	5	1	5	5	3	8.24914	3.28571	3.76186	4.89614	9.28571	4.28571	1.93757	5.10027	TRUE	TRUE	4	3	TRUE	5.04821	5.16967	-0.0342981	-0.433152
206	1	RL13A_MOUSE	RL13A_MOUSE		23.2	203	23465	60S ribosomal protein L13a OS=Mus musculus GN=Rpl13a PE=1 SV=4	34	34	1	3	8	5	3	3	7	5	3	8	5	3	3	7	5	3	8	5	3	3	7	5	5.40471	5.294	3.28571	8	5.42857	5.294	2.85714	5.08059	TRUE	TRUE	4	3	TRUE	5.49611	4.52657	0.279991	-0.123857
1310	1	CP341_MOUSE	CP341_MOUSE		31.2	504	57961	Cytochrome P450 3A41 OS=Mus musculus GN=Cyp3a41a PE=2 SV=1	106	14	0.132	11	29	27	8	9	10	12	5	7	0	2	0	0	0	7.19	13.25	0	3.2	0	0	0	13.272	10.3214	0.285714	9.74457	1.5	0.428571	0	5.0789	TRUE	FALSE	4	3	TRUE	8.40593	0.642857	3.70884	3.17954
968	1	CES3_MOUSE	CES3_MOUSE		15.2	565	61789	Carboxylesterase 3 OS=Mus musculus GN=Ces3 PE=1 SV=1	31	31	1	7	7	7	1	1	4	4	7	7	7	1	1	4	4	7	7	7	1	1	4	4	12.8571	4.57143	5.37143	4.57143	2.85714	2.85714	2.41171	5.07106	TRUE	TRUE	4	3	TRUE	6.84286	2.70867	1.33702	0.922434
267	1	TFAM_MOUSE	TFAM_MOUSE		28.8	243	27989	Transcription factor A, mitochondrial OS=Mus musculus GN=Tfam PE=2 SV=2	50	50	1	0	13	11	0	0	10	16	0	13	11	0	0	10	16	0	13	11	0	0	10	16	0	9.71429	7.91429	0	0	7.94286	9.71429	5.04082	TRUE	TRUE	2	2	TRUE	4.40714	5.88571	-0.417374	-0.700408
563	1	LEO1_MOUSE	LEO1_MOUSE		8.2	667	75642	RNA polymerase-associated protein LEO1 OS=Mus musculus GN=Leo1 PE=1 SV=1	35	35	1	2	9	4	2	3	6	9	2	9	4	2	3	6	9	2	9	4	2	3	6	9	4.052	6.06457	2.85714	6.42857	5.85714	4.57143	5.33543	5.02376	TRUE	TRUE	4	3	TRUE	4.85057	5.25467	-0.115445	-0.306352
103	1	OST48_MOUSE	OST48_MOUSE		15.2	441	49015	Dolichyl-diphosphooligosaccharide--protein glycosyltransferase 48 kDa subunit OS=Mus musculus GN=Ddost PE=1 SV=1	43	43	1	0	13	9	2	0	9	10	0	13	9	2	0	9	10	0	13	9	2	0	9	10	0	9.51886	6.42857	5.85714	0	7.24486	5.85714	4.98665	TRUE	TRUE	3	2	TRUE	5.45114	4.36733	0.319806	0.207091
287	1	RL36_MOUSE	RL36_MOUSE		21.9	105	12217	60S ribosomal protein L36 OS=Mus musculus GN=Rpl36 PE=2 SV=2	34	34	1	4	7	4	2	2	9	6	4	7	4	2	2	9	6	4	7	4	2	2	9	6	7.28571	4.28571	2.57486	6	4.14286	7.28571	3.28571	4.98008	TRUE	TRUE	4	3	TRUE	5.03657	4.90476	0.0382589	-0.185752
1066	1	MED1_MOUSE	MED1_MOUSE		6.3	1575	167142	Mediator of RNA polymerase II transcription subunit 1 OS=Mus musculus GN=Med1 PE=1 SV=2	30	30	1	6	7	4	1	2	3	7	6	7	4	1	2	3	7	6	7	4	1	2	3	7	11.5714	4.58929	2.85714	4.602	4.602	2.347	4.25714	4.97514	TRUE	TRUE	4	3	TRUE	5.90496	3.73538	0.660673	0.436389
1176	1	DIMT1_MOUSE	DIMT1_MOUSE		16	313	35275	Probable dimethyladenosine transferase OS=Mus musculus GN=Dimt1l PE=2 SV=1	24	24	1	2	1	2	3	8	4	4	2	1	2	3	8	4	4	2	1	2	3	8	4	4	4.57143	0.571429	1.42857	9.41071	12.8571	3.28571	2.565	4.95571	TRUE	TRUE	4	3	TRUE	3.99554	6.23595	-0.642221	-0.954918
813	1	RBM9_MOUSE	RBM9_MOUSE		23.2	449	47331	RNA-binding protein 9 OS=Mus musculus GN=Rbm9 PE=1 SV=2	39	39	1	2	10	8	0	2	5	12	2	10	8	0	2	5	12	2	10	8	0	2	5	12	4.14286	7.28571	5.98057	1	4.57143	4.14286	7.28571	4.91559	TRUE	TRUE	3	3	TRUE	4.60229	5.33333	-0.212687	-0.493325
1366	1	CELF2_MOUSE	CELF2_MOUSE		14.8	508	54272	CUGBP Elav-like family member 2 OS=Mus musculus GN=Celf2 PE=1 SV=1	77	27	0.351	2	22	14	1	12	9	17	0	12	4	1	1	2	7	0	14.553	5.081	1	2.833	2.438	8.489	1.57143	11.2219	3.90443	5.42857	5.40471	1.77686	4.78414	4.87029	TRUE	TRUE	4	3	TRUE	5.53157	3.98857	0.471817	0.148779
1358	1	DECR2_MOUSE	DECR2_MOUSE		22.9	292	31301	Peroxisomal 2,4-dienoyl-CoA reductase OS=Mus musculus GN=Decr2 PE=1 SV=1	34	34	1	1	5	12	0	2	9	5	1	5	12	0	2	9	5	1	5	12	0	2	9	5	3.28571	3.29243	9	2.85714	5.17186	7.57143	2.85714	4.86224	TRUE	TRUE	3	3	TRUE	4.60882	5.20014	-0.174153	-0.33097
388	1	RAB1A_MOUSE	RAB1A_MOUSE		32.7	205	22679	Ras-related protein Rab-1A OS=Mus musculus GN=Rab1A PE=1 SV=3	51	15	0.294	5	10	10	2	3	15	6	1	2	4	0	1	6	1	5	4.667	8	0	3	11.4	2.25	9.22857	2.61571	5.85714	0	5.85714	9.145	1.32143	4.86071	TRUE	FALSE	4	3	TRUE	4.42536	5.44119	-0.298128	-0.448746
338	1	NUP43_MOUSE	NUP43_MOUSE		17.1	380	42016	Nucleoporin Nup43 OS=Mus musculus GN=Nup43 PE=2 SV=1	36	36	1	2	10	4	2	2	7	9	2	10	4	2	2	7	9	2	10	4	2	2	7	9	3.85714	6.83329	2.60971	6.07143	4.14286	5.35271	4.89514	4.82318	TRUE	TRUE	4	3	TRUE	4.84289	4.7969	0.0137653	-0.0103953
872	1	OGT1_MOUSE	OGT1_MOUSE		19.1	1046	116953	UDP-N-acetylglucosamine--peptide N-acetylglucosaminyltransferase 110 kDa subunit OS=Mus musculus GN=Ogt PE=1 SV=2	43	43	1	0	12	7	0	0	9	15	0	12	7	0	0	9	15	0	12	7	0	0	9	15	0.857143	9.01343	5.30257	1.14286	0.857143	7.28571	9.22857	4.81249	TRUE	TRUE	2	2	TRUE	4.079	5.79048	-0.505466	-0.576024
800	1	RCC2_MOUSE	RCC2_MOUSE		13.7	520	55984	Protein RCC2 OS=Mus musculus GN=Rcc2 PE=2 SV=1	37	37	1	1	7	6	1	2	7	13	1	7	6	1	2	7	13	1	7	6	1	2	7	13	2.42857	4.57143	4.28571	4.26529	4.47143	5.70429	7.898	4.80353	TRUE	TRUE	4	3	TRUE	3.88775	6.02457	-0.631923	-0.696131
398	1	RS3_MOUSE	RS3_MOUSE		29.2	243	26675	40S ribosomal protein S3 OS=Mus musculus GN=Rps3 PE=1 SV=1	30	30	1	5	8	5	3	1	1	7	5	8	5	3	1	1	7	5	8	5	3	1	1	7	9.24114	5.40814	3.32771	8.42857	2.28571	0.666714	4.14286	4.78584	TRUE	TRUE	4	3	TRUE	6.60139	2.3651	1.48087	1.67049
314	1	CEBPA_MOUSE	CEBPA_MOUSE		6.1	359	37431	CCAAT/enhancer-binding protein alpha OS=Mus musculus GN=Cebpa PE=1 SV=2	26	26	1	3	3	2	5	5	4	4	3	3	2	5	5	4	4	3	3	2	5	5	4	4	5.43229	1.42857	1.14286	11.5714	8.66943	2.85714	2.28571	4.76963	TRUE	TRUE	4	3	TRUE	4.89379	4.6041	0.0880333	-0.039733
751	1	ACD11_MOUSE	ACD11_MOUSE		15.1	779	87367	Acyl-CoA dehydrogenase family member 11 OS=Mus musculus GN=Acad11 PE=1 SV=2	32	32	1	1	14	8	1	4	3	1	1	14	8	1	4	3	1	1	14	8	1	4	3	1	2.35714	10.8221	5.85714	4.14286	7.44086	2.28571	0.428571	4.76206	TRUE	TRUE	4	3	TRUE	5.79482	3.38505	0.775588	0.588635
798	1	NOL11_MOUSE	NOL11_MOUSE		11.8	723	80819	Nucleolar protein 11 OS=Mus musculus GN=Nol11 PE=2 SV=1	37	37	1	0	8	8	1	2	8	10	0	8	8	1	2	8	10	0	8	8	1	2	8	10	0.714286	5.57086	5.92857	4.25714	4.46829	6.42857	5.90471	4.7532	TRUE	TRUE	3	3	TRUE	4.11771	5.60052	-0.443718	-0.55551
514	1	I20L2_MOUSE	I20L2_MOUSE		17.1	368	41021	Interferon-stimulated 20 kDa exonuclease-like 2 OS=Mus musculus GN=Isg20l2 PE=2 SV=2	26	26	1	4	4	4	5	2	3	4	4	4	4	5	2	3	4	4	4	4	5	2	3	4	7.28571	2.28571	2.85714	11.9701	4.14286	2.28571	2.28571	4.73043	TRUE	TRUE	4	3	TRUE	6.09968	2.90476	1.07031	0.854143
205	1	GSTP1_MOUSE	GSTP1_MOUSE		20.5	210	23610	Glutathione S-transferase P 1 OS=Mus musculus GN=Gstp1 PE=1 SV=2	40	40	1	0	0	10	0	6	12	12	0	0	10	0	6	12	12	0	0	10	0	6	12	12	0	0	7.25	0	9.71429	9.28571	6.83329	4.72618	TRUE	TRUE	1	3	TRUE	1.8125	8.6111	-2.24822	-2.23955
311	1	ST1A1_MOUSE	ST1A1_MOUSE		10	291	33975	Sulfotransferase 1A1 OS=Mus musculus GN=Sult1a1 PE=2 SV=1	32	32	1	0	8	0	10	0	1	13	0	8	0	10	0	1	13	0	8	0	10	0	1	13	0	5.33543	0	19.2857	0	0.642857	7.60443	4.69549	TRUE	TRUE	2	2	TRUE	6.15529	2.7491	1.16287	0.792744
1225	1	ATPO_MOUSE	ATPO_MOUSE		24.9	213	23365	ATP synthase subunit O, mitochondrial OS=Mus musculus GN=Atp5o PE=1 SV=1	26	26	1	7	3	3	0	3	4	6	7	3	3	0	3	4	6	7	3	3	0	3	4	6	12.8571	1.72929	2.28571	2.28571	6.652	3.29243	3.73814	4.69149	TRUE	TRUE	3	3	TRUE	4.78946	4.56086	0.0705593	-0.185203
1292	1	CCD86_MOUSE	CCD86_MOUSE		16.4	426	46488	Coiled-coil domain-containing protein 86 OS=Mus musculus GN=Ccdc86 PE=1 SV=2	31	31	1	1	5	4	0	5	9	7	1	5	4	0	5	9	7	1	5	4	0	5	9	7	2.85714	3.28571	2.85714	2.57143	9.40471	7.555	4.30257	4.69053	TRUE	TRUE	3	3	TRUE	2.89286	7.08743	-1.29277	-1.40083
1275	1	AN32B_MOUSE	AN32B_MOUSE		12.1	272	31080	Acidic leucine-rich nuclear phosphoprotein 32 family member B OS=Mus musculus GN=Anp32b PE=1 SV=1	35	28	0.8	0	5	8	1	1	7	13	0	3	7	1	1	4	12	0	4.5	8	1	1	7	12.857	1.42857	2.57486	6.23814	5.30257	3.426	6	7.47957	4.63567	TRUE	TRUE	3	3	TRUE	3.88604	5.63519	-0.536165	-0.766797
1351	1	SKP1_MOUSE	SKP1_MOUSE		42.9	163	18673	S-phase kinase-associated protein 1 OS=Mus musculus GN=Skp1 PE=1 SV=3	23	23	1	6	5	4	1	1	0	6	6	5	4	1	1	0	6	6	5	4	1	1	0	6	11.916	3.29043	3	5.40814	3.71229	0.428571	3.85714	4.51608	TRUE	TRUE	4	2	TRUE	5.90364	2.666	1.14693	0.732476
1290	1	CMLO1_MOUSE	CMLO1_MOUSE		8.1	222	25015	Probable N-acetyltransferase CML1 OS=Mus musculus GN=Cml1 PE=1 SV=1	23	23	1	6	4	9	2	0	1	1	6	4	9	2	0	1	1	6	4	9	2	0	1	1	11.5714	2.42857	6.85714	7.51943	1.42857	0.933429	0.714286	4.49327	TRUE	TRUE	4	2	TRUE	7.09414	1.02543	2.7904	2.30808
1338	1	AKP8L_MOUSE	AKP8L_MOUSE		16.5	642	71455	A-kinase anchor protein 8-like OS=Mus musculus GN=Akap8l PE=1 SV=1	24	24	1	4	6	5	1	2	0	6	4	6	5	1	2	0	6	4	6	5	1	2	0	6	8.66943	4.14286	3.884	5.40471	5.02386	0.428571	3.80957	4.48043	TRUE	TRUE	4	2	TRUE	5.52525	3.08733	0.839678	0.555769
531	1	TEX10_MOUSE	TEX10_MOUSE		15	928	105210	Testis-expressed sequence 10 protein OS=Mus musculus GN=Tex10 PE=2 SV=1	36	36	1	3	8	6	0	2	5	12	3	8	6	0	2	5	12	3	8	6	0	2	5	12	5.85714	5.42857	4.20414	0.428571	4.20414	3.98986	7.25	4.48035	TRUE	TRUE	3	3	TRUE	3.97961	5.148	-0.371386	-0.421099
303	1	XPC_MOUSE	XPC_MOUSE		16.1	930	104523	DNA repair protein complementing XP-C cells homolog OS=Mus musculus GN=Xpc PE=1 SV=2	44	44	1	0	10	14	0	1	5	14	0	10	14	0	1	5	14	0	10	14	0	1	5	14	0	6.8	10.2467	0	2.28571	3.73814	8.24914	4.47424	TRUE	TRUE	2	3	TRUE	4.26168	4.75767	-0.158832	-0.290129
318	1	RD23B_MOUSE	RD23B_MOUSE		17.1	416	43518	UV excision repair protein RAD23 homolog B OS=Mus musculus GN=Rad23b PE=1 SV=1	27	27	1	1	8	3	4	4	3	4	1	8	3	4	4	3	4	1	8	3	4	4	3	4	2.14286	5.35271	1.77686	10.4286	7.28571	2	2.28571	4.46749	TRUE	TRUE	4	3	TRUE	4.92525	3.85714	0.352664	0.10741
116	1	AT2A2_MOUSE	AT2A2_MOUSE		12	1044	114859	Sarcoplasmic/endoplasmic reticulum calcium ATPase 2 OS=Mus musculus GN=Atp2a2 PE=1 SV=2	27	27	1	6	8	7	2	2	1	1	6	8	7	2	2	1	1	6	8	7	2	2	1	1	10.7029	5.2	4.71429	5.85714	3.91671	0.571429	0.285714	4.46402	TRUE	TRUE	4	3	TRUE	6.61857	1.59129	2.05633	1.55214
41	1	TM201_MOUSE	TM201_MOUSE		8.9	664	72501	Transmembrane protein 201 OS=Mus musculus GN=Tmem201 PE=2 SV=1	43	43	1	2	11	11	0	0	7	12	2	11	11	0	0	7	12	2	11	11	0	0	7	12	3.48057	7.57143	7.898	0	0	5.17186	6.8	4.41741	TRUE	TRUE	3	2	TRUE	4.7375	3.99062	0.247513	-0.0482289
61	1	SC22B_MOUSE	SC22B_MOUSE		25.1	215	24742	Vesicle-trafficking protein SEC22b OS=Mus musculus GN=Sec22b PE=1 SV=3	29	29	1	4	4	7	2	3	4	5	4	4	7	2	3	4	5	4	4	7	2	3	4	5	6.85714	2	4.71429	5.85714	5.42857	2.85714	2.85714	4.36735	TRUE	TRUE	4	3	TRUE	4.85714	3.71429	0.387023	0.125332
660	1	RBM16_MOUSE	RBM16_MOUSE		11.4	1268	139573	Putative RNA-binding protein 16 OS=Mus musculus GN=Rbm16 PE=1 SV=1	40	40	1	0	14	8	0	0	8	10	0	14	8	0	0	8	10	0	14	8	0	0	8	10	0.428571	10.6379	5.85714	0.714286	0.571429	6.42857	5.85714	4.35643	TRUE	TRUE	2	2	TRUE	4.40946	4.28571	0.0410677	-0.276627
1170	1	UTP11_MOUSE	UTP11_MOUSE		21.7	253	30552	Probable U3 small nucleolar RNA-associated protein 11 OS=Mus musculus GN=Utp11l PE=2 SV=1	30	30	1	1	6	6	0	3	7	7	1	6	6	0	3	7	7	1	6	6	0	3	7	7	2.85714	4.14286	4.57143	2.23586	6.46	5.92857	4.28571	4.35451	TRUE	TRUE	3	3	TRUE	3.45182	5.5581	-0.687233	-1.03238
831	1	RBBP5_MOUSE	RBBP5_MOUSE		16.5	538	59099	Retinoblastoma-binding protein 5 OS=Mus musculus GN=Rbbp5 PE=1 SV=2	38	38	1	0	12	4	0	1	5	16	0	12	4	0	1	5	16	0	12	4	0	1	5	16	0.760429	9	2.85714	1.01857	2.85714	4.14286	9.79914	4.3479	TRUE	TRUE	2	3	TRUE	3.40904	5.59971	-0.71599	-0.961051
1314	1	CCNT1_MOUSE	CCNT1_MOUSE		18.4	724	80567	Cyclin-T1 OS=Mus musculus GN=Ccnt1 PE=1 SV=2	34	34	1	0	7	12	0	0	7	8	0	7	12	0	0	7	8	0	7	12	0	0	7	8	1.42857	4.77686	9	2.85714	1.57143	6	4.71429	4.33547	TRUE	TRUE	2	2	TRUE	4.51564	4.09524	0.140984	0.0426437
753	1	NUCKS_MOUSE	NUCKS_MOUSE		28.2	234	26314	Nuclear ubiquitous casein and cyclin-dependent kinases substrate OS=Mus musculus GN=Nucks1 PE=1 SV=1	26	26	1	0	2	3	2	8	6	5	0	2	3	2	8	6	5	0	2	3	2	8	6	5	0.571429	0.859143	2.16886	6.54943	12.5536	4.59114	2.85714	4.30724	TRUE	TRUE	3	3	TRUE	2.53721	6.66729	-1.39385	-1.53425
1272	1	ZNF22_MOUSE	ZNF22_MOUSE		17.3	237	27295	Zinc finger protein 22 OS=Mus musculus GN=Znf22 PE=1 SV=2	32	32	1	0	14	8	0	0	6	4	0	14	8	0	0	6	4	0	14	8	0	0	6	4	1.42857	11.1429	6.21429	2.43257	1.42857	4.79586	2.61571	4.29406	TRUE	TRUE	2	2	TRUE	5.30457	2.94671	0.848129	0.830128
1203	1	RRFM_MOUSE	RRFM_MOUSE		39.3	262	29052	Ribosome-recycling factor, mitochondrial OS=Mus musculus GN=Mrrf PE=1 SV=1	24	24	1	0	5	7	7	0	2	3	0	5	7	7	0	2	3	0	5	7	7	0	2	3	1.28571	3.26686	5.42857	15.2857	1.42857	1.43871	1.91157	4.29224	TRUE	TRUE	3	2	TRUE	6.31671	1.59295	1.98747	1.9674
929	1	ILKAP_MOUSE	ILKAP_MOUSE		17.6	392	42775	Integrin-linked kinase-associated serine/threonine phosphatase 2C OS=Mus musculus GN=Ilkap PE=2 SV=1	31	31	1	1	9	7	2	0	4	8	1	9	7	2	0	4	8	1	9	7	2	0	4	8	2.8	6.27571	5.35271	7.24486	0.857143	2.85714	4.57143	4.27986	TRUE	TRUE	4	2	TRUE	5.41832	2.7619	0.972182	0.85762
1222	1	EXOS1_MOUSE	EXOS1_MOUSE		35.9	195	21425	3'-5' exoribonuclease CSL4 homolog OS=Mus musculus GN=Exosc1 PE=2 SV=1	20	20	1	5	0	3	0	7	2	3	5	0	3	0	7	2	3	5	0	3	0	7	2	3	10.2857	0	2.28571	2.28571	11.5714	1.5	1.96429	4.27041	TRUE	TRUE	2	3	TRUE	3.71429	5.0119	-0.432274	-0.575062
939	1	TDIF2_MOUSE	TDIF2_MOUSE		17	758	84278	Deoxynucleotidyltransferase terminal-interacting protein 2 OS=Mus musculus GN=Dnttip2 PE=1 SV=1	29	29	1	1	3	4	1	3	7	10	1	3	4	1	3	7	10	1	3	4	1	3	7	10	2.85714	1.42857	2.85714	4.57143	6.27571	5.85714	5.92857	4.25367	TRUE	TRUE	4	3	TRUE	2.92857	6.02048	-1.03968	-1.11098
44	1	MA7D3_MOUSE	MA7D3_MOUSE		2.3	876	98231	MAP7 domain-containing protein 3 OS=Mus musculus GN=Map7d3 PE=2 SV=1	20	20	1	8	0	1	2	3	6	0	8	0	1	2	3	6	0	8	0	1	2	3	6	0	13.4301	0	0.428571	5.85714	5.42857	4.57143	0	4.24512	TRUE	TRUE	3	2	TRUE	4.92896	3.33333	0.564319	0.402222
487	1	PPA5_MOUSE	PPA5_MOUSE		12.2	327	36808	Tartrate-resistant acid phosphatase type 5 OS=Mus musculus GN=Acp5 PE=2 SV=2	41	41	1	0	5	21	0	0	1	14	0	5	21	0	0	1	14	0	5	21	0	0	1	14	0.142857	2.85714	16.8499	0.285714	0.285714	0.714286	8.42857	4.22345	TRUE	TRUE	2	2	TRUE	5.03389	3.14286	0.679598	0.550952
1182	1	EXOS7_MOUSE	EXOS7_MOUSE		22	291	31666	Exosome complex exonuclease RRP42 OS=Mus musculus GN=Exosc7 PE=2 SV=1	29	29	1	1	6	5	0	4	3	10	1	6	5	0	4	3	10	1	6	5	0	4	3	10	2.85714	4.14286	3.75157	2.28571	8	2.39629	6.06457	4.21402	TRUE	TRUE	3	3	TRUE	3.25932	5.48695	-0.751433	-0.774059
465	1	RBBP6_MOUSE	RBBP6_MOUSE		11.8	1790	199588	Retinoblastoma-binding protein 6 OS=Mus musculus GN=Rbbp6 PE=1 SV=5	34	34	1	1	5	6	0	5	5	12	1	5	6	0	5	5	12	1	5	6	0	5	5	12	2.28571	2.85714	4.14286	0.285714	8.78157	3.88886	7.19043	4.20461	TRUE	TRUE	3	3	TRUE	2.39286	6.62029	-1.46816	-1.49416
1062	1	RPAB3_MOUSE	RPAB3_MOUSE		35.3	150	17144	DNA-directed RNA polymerases I, II, and III subunit RPABC3 OS=Mus musculus GN=Polr2h PE=2 SV=3	30	30	1	2	4	7	1	0	7	9	2	4	7	1	0	7	9	2	4	7	1	0	7	9	4.57143	2.33714	5.40471	4.59114	1.14286	5.85714	5.49557	4.2	TRUE	TRUE	4	2	TRUE	4.22611	4.16519	0.0209469	-0.15875
1078	1	TMED9_MOUSE	TMED9_MOUSE		16.2	235	27128	Transmembrane emp24 domain-containing protein 9 OS=Mus musculus GN=Tmed9 PE=2 SV=2	32	21	0.656	0	5	8	1	2	2	14	0	2	6	1	2	1	9	0	5	8	1	2	1.5	14	1.14286	3.00486	6.07143	4.71429	4.66671	1.07143	8.72243	4.19914	TRUE	TRUE	3	3	TRUE	3.73336	4.82019	-0.368617	-0.611055
419	1	PP2AA_MOUSE	PP2AA_MOUSE		25.2	309	35609	Serine/threonine-protein phosphatase 2A catalytic subunit alpha isoform OS=Mus musculus GN=Ppp2ca PE=1 SV=1	32	32	1	1	8	6	3	0	5	9	1	8	6	3	0	5	9	1	8	6	3	0	5	9	2.23586	5.42857	4.14286	8.42857	0	3.85714	5.28914	4.19745	TRUE	TRUE	4	2	TRUE	5.05896	3.04876	0.730619	0.492493
96	1	RING1_MOUSE	RING1_MOUSE		19.2	406	42632	E3 ubiquitin-protein ligase RING1 OS=Mus musculus GN=Ring1 PE=1 SV=2	30	22	0.733	5	4	5	3	1	3	9	5	3	3	3	1	3	4	5	3.375	4	3	1	3	6.222	9	1.91071	2.42857	8	2.21429	1.85714	3.88886	4.18565	TRUE	TRUE	4	3	TRUE	5.33482	2.65343	1.00758	0.939296
1335	1	H17B6_MOUSE	H17B6_MOUSE		29	317	36104	17-beta-hydroxysteroid dehydrogenase type 6 OS=Mus musculus GN=Hsd17b6 PE=2 SV=1	63	9	0.143	8	22	9	4	3	9	8	2	5	0	1	0	1	0	5	10.313	0	2	0	2.333	0	10.4286	7.44086	0.285714	7.57143	1.76186	1.76186	0	4.17861	TRUE	FALSE	4	3	TRUE	6.43164	1.17457	2.45305	2.45684
322	1	CX6B1_MOUSE	CX6B1_MOUSE		29.1	86	10072	Cytochrome c oxidase subunit 6B1 OS=Mus musculus GN=Cox6b1 PE=1 SV=2	43	43	1	0	9	10	0	0	8	16	0	9	10	0	0	8	16	0	9	10	0	0	8	16	0	6	7.28571	0	0	6.23814	9.71429	4.17688	TRUE	TRUE	2	2	TRUE	3.32143	5.31748	-0.678938	-0.743226
1265	1	SET_MOUSE	SET_MOUSE		14.9	289	33379	Protein SET OS=Mus musculus GN=Set PE=1 SV=1	24	24	1	2	6	2	4	0	0	10	2	6	2	4	0	0	10	2	6	2	4	0	0	10	4.602	4.14286	1.42857	11.2756	1.42857	0.285714	6.07257	4.17655	TRUE	TRUE	4	1	TRUE	5.36225	2.59562	1.04676	0.936744
789	1	NOC4L_MOUSE	NOC4L_MOUSE		21.3	516	58677	Nucleolar complex protein 4 homolog OS=Mus musculus GN=Noc4l PE=2 SV=1	32	32	1	0	3	8	0	5	7	9	0	3	8	0	5	7	9	0	3	8	0	5	7	9	0.714286	1.42857	5.92857	0.892286	9.01343	5.64871	5.42857	4.15063	TRUE	TRUE	2	3	TRUE	2.24093	6.6969	-1.5794	-1.72722
712	1	RL10_MOUSE	RL10_MOUSE		18.7	214	24605	60S ribosomal protein L10 OS=Mus musculus GN=Rpl10 PE=2 SV=3	27	27	1	3	5	6	1	3	3	6	3	5	6	1	3	3	6	3	5	6	1	3	3	6	6	2.85714	4.28571	4.14286	6	2.28571	3.35943	4.13298	TRUE	TRUE	4	3	TRUE	4.32143	3.88171	0.154814	0.101323
1313	1	NAGAB_MOUSE	NAGAB_MOUSE		13.5	415	47236	Alpha-N-acetylgalactosaminidase OS=Mus musculus GN=Naga PE=2 SV=2	28	28	1	2	5	11	0	1	4	5	2	5	11	0	1	4	5	2	5	11	0	1	4	5	4.76	3.28571	8.19643	2.85714	3.64286	3.32771	2.85714	4.13243	TRUE	TRUE	3	3	TRUE	4.77482	3.2759	0.543553	0.437441
1064	1	MTA3_MOUSE	MTA3_MOUSE		18.1	591	67078	Metastasis-associated protein MTA3 OS=Mus musculus GN=Mta3 PE=1 SV=1	59	15	0.254	6	18	9	3	4	7	12	3	5	0	2	2	1	2	3.487	8.864	0	2.111	2.1	1.762	3.649	6.652	5.98057	0	7.64086	5.3	1.10886	2.23557	4.13112	TRUE	FALSE	4	3	TRUE	5.06836	2.88148	0.81471	0.708754
1130	1	CD043_MOUSE	CD043_MOUSE		14.9	221	25783	UPF0534 protein C4orf43 homolog OS=Mus musculus PE=2 SV=1	18	18	1	4	3	0	2	4	4	1	4	3	0	2	4	4	1	4	3	0	2	4	4	1	8.04757	1.5	0.142857	7.28571	8	3.28571	0.595286	4.12245	TRUE	TRUE	3	3	TRUE	4.24404	3.96033	0.0998149	-0.0740574
735	1	INT2_MOUSE	INT2_MOUSE		16.2	1198	133516	Integrator complex subunit 2 OS=Mus musculus GN=Ints2 PE=2 SV=2	30	30	1	2	4	7	1	1	6	9	2	4	7	1	1	6	9	2	4	7	1	1	6	9	4.14286	2.28571	5.3	4.14286	2.85714	4.58929	5.40814	4.10371	TRUE	TRUE	4	3	TRUE	3.96786	4.28486	-0.110887	-0.356936
933	1	EPIPL_MOUSE	EPIPL_MOUSE		15.4	6548	723311	Epiplakin OS=Mus musculus GN=Eppk1 PE=1 SV=2	32	32	1	1	2	6	0	2	8	13	1	2	6	0	2	8	13	1	2	6	0	2	8	13	2.84614	1	4.47143	1.28571	4.57143	6.43614	8	4.08727	TRUE	TRUE	3	3	TRUE	2.40082	6.33586	-1.40001	-1.65354
399	1	RL32_MOUSE	RL32_MOUSE		33.3	135	15861	60S ribosomal protein L32 OS=Mus musculus GN=Rpl32 PE=2 SV=2	35	35	1	0	12	7	1	1	5	9	0	12	7	1	1	5	9	0	12	7	1	1	5	9	0	8.93114	4.85714	3.71229	2.31629	3.80957	4.982	4.08692	TRUE	TRUE	3	3	TRUE	4.37514	3.70262	0.240784	0.179131
1242	1	RSRC1_MOUSE	RSRC1_MOUSE		25.4	334	38638	Arginine/serine-rich coiled-coil protein 1 OS=Mus musculus GN=Rsrc1 PE=1 SV=1	23	23	1	3	4	4	1	2	5	4	3	4	4	1	2	5	4	3	4	4	1	2	5	4	6.51943	2.36729	2.85714	5.17186	4.79586	4.28571	2.57486	4.08173	TRUE	TRUE	4	3	TRUE	4.22893	3.88548	0.122201	0.214052
128	1	DHCR7_MOUSE	DHCR7_MOUSE		13.4	471	53920	7-dehydrocholesterol reductase OS=Mus musculus GN=Dhcr7 PE=2 SV=1	31	31	1	4	8	7	1	1	3	7	4	8	7	1	1	3	7	4	8	7	1	1	3	7	6.92857	5.28914	4.76	3.19043	2.25	1.85714	4.14286	4.05973	TRUE	TRUE	4	3	TRUE	5.04204	2.75	0.874575	1.2406
593	1	HSP74_MOUSE	HSP74_MOUSE		4.2	841	94134	Heat shock 70 kDa protein 4 OS=Mus musculus GN=Hspa4 PE=1 SV=1	17	16	0.941	1	2	0	4	9	0	1	1	1	0	4	9	0	1	1	2	0	4	9	0	1	2.28571	0.857143	0	10.8221	14	0	0.428571	4.05622	TRUE	TRUE	3	2	TRUE	3.49125	4.80952	-0.46215	-0.557495
182	1	DNMT1_MOUSE	DNMT1_MOUSE		9.8	1620	183190	DNA (cytosine-5)-methyltransferase 1 OS=Mus musculus GN=Dnmt1 PE=1 SV=5	20	20	1	6	2	2	1	8	0	1	6	2	2	1	8	0	1	6	2	2	1	8	0	1	10.7857	0.724857	1.01857	3.28571	12.2619	0	0.285714	4.05178	TRUE	TRUE	4	2	TRUE	3.95371	4.18252	-0.0811651	-0.146438
400	1	RL8_MOUSE	RL8_MOUSE		28	257	28026	60S ribosomal protein L8 OS=Mus musculus GN=Rpl8 PE=2 SV=2	34	34	1	2	10	7	1	0	5	9	2	10	7	1	0	5	9	2	10	7	1	0	5	9	3.98986	6.85714	4.873	3.71429	0	3.85714	5.02386	4.04504	TRUE	TRUE	4	2	TRUE	4.85857	2.96033	0.714773	1.07146
1069	1	CDK9_MOUSE	CDK9_MOUSE		12.6	372	42763	Cell division protein kinase 9 OS=Mus musculus GN=Cdk9 PE=2 SV=1	36	15	0.417	1	4	9	3	3	11	5	1	1	2	2	1	6	2	1	1.6	5.5	2.25	1.667	8.5	3.2	2.85714	0.657143	3.98986	7.877	3.80957	6.92857	2.17143	4.04153	TRUE	TRUE	4	3	TRUE	3.84529	4.30319	-0.162316	-0.329101
137	1	CCNK_MOUSE	CCNK_MOUSE		13.2	554	61377	Cyclin-K OS=Mus musculus GN=Ccnk PE=1 SV=2	32	32	1	3	5	8	0	3	8	5	3	5	8	0	3	8	5	3	5	8	0	3	8	5	5.35271	2.84614	5.64871	0	5.42857	6.14286	2.85714	4.03945	TRUE	TRUE	3	3	TRUE	3.46189	4.80952	-0.474333	-0.831562
976	1	AT1A1_MOUSE	AT1A1_MOUSE		13.6	1023	112983	Sodium/potassium-transporting ATPase subunit alpha-1 OS=Mus musculus GN=Atp1a1 PE=1 SV=1	24	24	1	4	6	6	0	3	3	2	4	6	6	0	3	3	2	4	6	6	0	3	3	2	8	4.14286	4.57143	1.42857	6.42857	2.28571	1.14286	4	TRUE	TRUE	3	3	TRUE	4.53571	3.28571	0.465123	0.684377
175	1	FINC_MOUSE	FINC_MOUSE		8.6	2477	272490	Fibronectin OS=Mus musculus GN=Fn1 PE=1 SV=3	39	39	1	0	11	5	0	1	9	13	0	11	5	0	1	9	13	0	11	5	0	1	9	13	0	7.64086	3.26686	0	2.28571	7.28571	7.5	3.99702	TRUE	TRUE	2	3	TRUE	2.72693	5.69048	-1.06127	-1.77936
177	1	MUP1_MOUSE	MUP1_MOUSE		47.8	180	20649	Major urinary protein 1 OS=Mus musculus GN=Mup1 PE=1 SV=1	90	1	0.011	1	6	34	0	19	15	15	0	0	1	0	0	0	0	0	0	34	0	0	0	0	0	0	27.704	0	0	0	0	3.95771	TRUE	FALSE	3	3	TRUE	6.926	0		-0.282351
1119	1	CN166_MOUSE	CN166_MOUSE		16.8	244	28153	UPF0568 protein C14orf166 homolog OS=Mus musculus PE=2 SV=1	21	21	1	2	6	1	2	3	2	5	2	6	1	2	3	2	5	2	6	1	2	3	2	5	4.57143	4.14286	0.857143	7.28571	6.42857	1.42857	2.85714	3.93878	TRUE	TRUE	4	3	TRUE	4.21429	3.57143	0.238787	0.136871
207	1	COX41_MOUSE	COX41_MOUSE		14.2	169	19531	Cytochrome c oxidase subunit 4 isoform 1, mitochondrial OS=Mus musculus GN=Cox4i1 PE=1 SV=2	34	34	1	2	8	6	0	1	10	7	2	8	6	0	1	10	7	2	8	6	0	1	10	7	3.71543	5.3	4.14286	0	2.28571	7.898	4.14286	3.92641	TRUE	TRUE	3	3	TRUE	3.28957	4.77552	-0.537759	-1.22818
1191	1	TMEDA_MOUSE	TMEDA_MOUSE		31.5	219	24912	Transmembrane emp24 domain-containing protein 10 OS=Mus musculus GN=Tmed10 PE=2 SV=1	32	32	1	0	8	8	0	0	4	12	0	8	8	0	0	4	12	0	8	8	0	0	4	12	1.22443	5.85714	6.14286	2.28571	1.381	3.28571	7.28571	3.92322	TRUE	TRUE	2	2	TRUE	3.87754	3.98414	-0.0391293	-0.331054
983	1	CI082_MOUSE	CI082_MOUSE		21.6	356	37824	Uncharacterized protein C9orf82 homolog OS=Mus musculus PE=1 SV=1	19	19	1	3	3	2	2	4	2	3	3	3	2	2	4	2	3	3	3	2	2	4	2	3	6.28571	1.42857	1.366	7.28571	7.877	1.42857	1.76186	3.91906	TRUE	TRUE	4	3	TRUE	4.0915	3.68914	0.149344	0.0130212
1011	1	CP270_MOUSE	CP270_MOUSE		18	489	56021	Cytochrome P450 2C70 OS=Mus musculus GN=Cyp2c70 PE=2 SV=2	36	28	0.778	1	11	12	2	0	3	7	1	8	9	0	0	3	7	1	10.182	11.077	0	0	3	7	2.85714	7.34743	8.24914	1.42857	1.00457	2.32	4.20886	3.91653	TRUE	TRUE	4	2	TRUE	4.97057	2.51114	0.985068	1.40499
852	1	CSTFT_MOUSE	CSTFT_MOUSE		18.4	632	65863	Cleavage stimulation factor subunit 2 tau variant OS=Mus musculus GN=Cstf2t PE=1 SV=2	90	15	0.167	9	17	18	7	6	15	18	6	2	2	0	2	3	0	6.818	3.765	3.882	0	2.348	5.118	0	12.2296	1.96643	2.41171	1.14286	5.33543	4.30257	0	3.91265	TRUE	FALSE	4	3	TRUE	4.43764	3.21267	0.466022	0.69132
1084	1	RLP24_MOUSE	RLP24_MOUSE		16.6	163	19612	Probable ribosome biogenesis protein RLP24 OS=Mus musculus GN=Rsl24d1 PE=2 SV=1	14	14	1	4	1	2	3	4	0	0	4	1	2	3	4	0	0	4	1	2	3	4	0	0	8	0.428571	1.42857	9.23814	8	0.285714	0	3.91157	TRUE	TRUE	4	1	TRUE	4.77382	2.7619	0.789481	0.970105
1021	1	METK1_MOUSE	METK1_MOUSE		17.2	396	43510	S-adenosylmethionine synthase isoform type-1 OS=Mus musculus GN=Mat1a PE=2 SV=1	23	23	1	2	3	1	3	1	3	10	2	3	1	3	1	3	10	2	3	1	3	1	3	10	4.57143	1.42857	0.857143	9.19043	2.85714	2.33329	6	3.89114	TRUE	TRUE	4	3	TRUE	4.01189	3.73014	0.105052	-0.0245661
408	1	1433Z_MOUSE	1433Z_MOUSE		46.1	245	27772	14-3-3 protein zeta/delta OS=Mus musculus GN=Ywhaz PE=1 SV=1	44	17	0.386	9	9	5	6	3	8	4	3	5	2	1	1	3	2	4.636	5.606	2.286	1.385	1.25	3.682	2.148	8.948	3.51943	1.46943	5.57086	3.75	2.66886	1.30686	3.89049	TRUE	TRUE	4	3	TRUE	4.87693	2.57524	0.921267	1.00293
1270	1	WDR61_MOUSE	WDR61_MOUSE		24.9	305	33774	WD repeat-containing protein 61 OS=Mus musculus GN=Wdr61 PE=2 SV=1	29	29	1	0	9	6	0	1	5	8	0	9	6	0	1	5	8	0	9	6	0	1	5	8	1.42857	6.42857	4.57143	2.42857	3.35943	4.28571	4.71429	3.88808	TRUE	TRUE	2	3	TRUE	3.71429	4.11981	-0.149493	-0.398857
470	1	TYY1_MOUSE	TYY1_MOUSE		25.6	414	44718	Transcriptional repressor protein YY1 OS=Mus musculus GN=Yy1 PE=1 SV=1	30	30	1	2	8	6	1	1	3	9	2	8	6	1	1	3	9	2	8	6	1	1	3	9	3.99629	5.42857	4.14286	3.73814	2.347	2.19043	5.3	3.87761	TRUE	TRUE	4	3	TRUE	4.32646	3.27914	0.39987	0.31722
973	1	PARN_MOUSE	PARN_MOUSE		14.1	624	71560	Poly(A)-specific ribonuclease PARN OS=Mus musculus GN=Parn PE=1 SV=1	22	22	1	2	0	4	2	1	7	6	2	0	4	2	1	7	6	2	0	4	2	1	7	6	4.30257	0	2.85714	7.28571	2.85714	5.85714	3.66171	3.83163	TRUE	TRUE	3	3	TRUE	3.61136	4.12533	-0.19197	-0.394793
37	1	K1C24_MOUSE	K1C24_MOUSE		3.1	512	54042	Keratin, type I cytoskeletal 24 OS=Mus musculus GN=Krt24 PE=2 SV=2	39	19	0.487	7	8	11	3	4	5	1	2	3	5	3	2	3	1	2.074	3.107	5.144	3	2.024	3.059	1	4.982	1.87243	3.91671	8	5.28914	2.47271	0.285714	3.83124	TRUE	TRUE	4	3	TRUE	4.69279	2.68252	0.806854	0.670222
288	1	EIF1_MOUSE	EIF1_MOUSE		33.6	113	12748	Eukaryotic translation initiation factor 1 OS=Mus musculus GN=Eif1 PE=2 SV=2	28	28	1	0	5	6	2	3	7	5	0	5	6	2	3	7	5	0	5	6	2	3	7	5	0	2.85714	4.14286	6	5.64871	5.30257	2.85714	3.82978	TRUE	TRUE	3	3	TRUE	3.25	4.60281	-0.502075	-0.694816
187	1	CALR_MOUSE	CALR_MOUSE		11.3	416	47996	Calreticulin OS=Mus musculus GN=Calr PE=1 SV=1	38	38	1	0	6	8	0	1	8	15	0	6	8	0	1	8	15	0	6	8	0	1	8	15	0	3.615	5.70429	0	2.28571	6.16471	9	3.82424	TRUE	TRUE	2	3	TRUE	2.32982	5.81681	-1.32001	-1.52532
963	1	WDR74_MOUSE	WDR74_MOUSE		15.9	384	42637	WD repeat-containing protein 74 OS=Mus musculus GN=Wdr74 PE=2 SV=1	29	29	1	0	7	2	0	3	9	8	0	7	2	0	3	9	8	0	7	2	0	3	9	8	0.868143	4.57143	1.35714	1.42857	6.28571	7.47957	4.57143	3.79457	TRUE	TRUE	2	3	TRUE	2.05632	6.11224	-1.57163	-1.74757
810	1	ECHA_MOUSE	ECHA_MOUSE		16.5	763	82671	Trifunctional enzyme subunit alpha, mitochondrial OS=Mus musculus GN=Hadha PE=1 SV=1	24	24	1	4	2	10	1	1	0	6	4	2	10	1	1	0	6	4	2	10	1	1	0	6	7.64086	0.9	7.28571	4.28571	2.85714	0	3.51943	3.78412	TRUE	TRUE	4	2	TRUE	5.02807	2.12552	1.24219	1.27854
590	1	ARGI1_MOUSE	ARGI1_MOUSE		13.6	323	34809	Arginase-1 OS=Mus musculus GN=Arg1 PE=1 SV=1	23	23	1	2	8	3	3	1	3	3	2	8	3	3	1	3	3	2	8	3	3	1	3	3	4.14286	5.43229	1.93757	8.74286	2.42857	2.28571	1.42857	3.7712	TRUE	TRUE	4	3	TRUE	5.06389	2.04762	1.3063	1.42699
1331	1	PPIE_MOUSE	PPIE_MOUSE		19.9	301	33450	Peptidyl-prolyl cis-trans isomerase E OS=Mus musculus GN=Ppie PE=2 SV=2	22	22	1	2	4	4	1	1	4	6	2	4	4	1	1	4	6	2	4	4	1	1	4	6	4.78414	2.42857	2.85714	5.37143	3.66171	3.35943	3.803	3.7522	TRUE	TRUE	4	3	TRUE	3.86032	3.60805	0.0975026	0.110601
269	1	COT2_MOUSE	COT2_MOUSE		16.2	414	45572	COUP transcription factor 2 OS=Mus musculus GN=Nr2f2 PE=2 SV=2	27	23	0.852	1	7	4	2	3	3	7	1	5	3	2	3	3	6	1	6.429	3.429	2	3	3	6.273	2	4.20414	2.347	5.98057	5.555	2	3.91671	3.71478	TRUE	TRUE	4	3	TRUE	3.63293	3.8239	-0.0739136	0.00613821
278	1	PRS7_MOUSE	PRS7_MOUSE		23.6	433	48649	26S protease regulatory subunit 7 OS=Mus musculus GN=Psmc2 PE=1 SV=5	24	24	1	4	4	5	1	3	3	4	4	4	5	1	3	3	4	4	4	5	1	3	3	4	7.24486	2.28571	3.28571	3.32771	5.57086	2	2.28571	3.71437	TRUE	TRUE	4	3	TRUE	4.036	3.28552	0.296803	0.326606
987	1	RBM4B_MOUSE	RBM4B_MOUSE		37.3	357	39992	RNA-binding protein 4B OS=Mus musculus GN=Rbm4b PE=2 SV=1	58	4	0.069	4	14	9	1	3	13	14	1	1	0	0	0	1	1	4	3.167	0	0	0	13	5.333	8	1.881	0	1.42857	1	10.4286	3.19043	3.70408	TRUE	FALSE	4	3	TRUE	2.82739	4.873	-0.785338	-0.732995
1163	1	ZCHC8_MOUSE	ZCHC8_MOUSE		29.2	709	78027	Zinc finger CCHC domain-containing protein 8 OS=Mus musculus GN=Zcchc8 PE=2 SV=3	20	20	1	3	8	6	1	1	0	1	3	8	6	1	1	0	1	3	8	6	1	1	0	1	6.44671	5.85714	4.57143	4.79586	3.26686	0.285714	0.642857	3.69522	TRUE	TRUE	4	2	TRUE	5.41779	1.39848	1.95385	2.09957
415	1	UBC9_MOUSE	UBC9_MOUSE		44.9	158	18008	SUMO-conjugating enzyme UBC9 OS=Mus musculus GN=Ube2i PE=1 SV=1	35	35	1	0	5	7	0	2	8	13	0	5	7	0	2	8	13	0	5	7	0	2	8	13	0	2.85714	4.89514	0	4.14286	6.28571	7.64086	3.68882	TRUE	TRUE	2	3	TRUE	1.93807	6.02314	-1.63589	-1.52769
1200	1	PHF6_MOUSE	PHF6_MOUSE		17.3	364	41140	PHD finger protein 6 OS=Mus musculus GN=Phf6 PE=1 SV=1	20	20	1	2	3	3	1	3	6	2	2	3	3	1	3	6	2	2	3	3	1	3	6	2	4.57143	1.579	2.28571	4.89514	6.53186	4.76	1.14286	3.68086	TRUE	TRUE	4	3	TRUE	3.33282	4.1449	-0.314595	-0.221554
347	1	RS20_MOUSE	RS20_MOUSE		19.3	119	13374	40S ribosomal protein S20 OS=Mus musculus GN=Rps20 PE=1 SV=1	26	26	1	0	7	4	2	3	7	3	0	7	4	2	3	7	3	0	7	4	2	3	7	3	0	4.28571	2.61429	6.07257	5.85714	5.37143	1.42857	3.66139	TRUE	TRUE	3	3	TRUE	3.24314	4.21905	-0.379525	-0.349266
108	1	DNJB6_MOUSE	DNJB6_MOUSE		16.2	365	39808	DnaJ homolog subfamily B member 6 OS=Mus musculus GN=Dnajb6 PE=1 SV=4	19	19	1	3	3	0	3	4	4	2	3	3	0	3	4	4	2	3	3	0	3	4	4	2	5.30257	1.28571	0	8	7.28571	2.85714	0.857143	3.65547	TRUE	TRUE	3	3	TRUE	3.64707	3.66667	-0.00773066	-0.012804
804	1	TF3C2_MOUSE	TF3C2_MOUSE		18.2	907	100276	General transcription factor 3C polypeptide 2 OS=Mus musculus GN=Gtf3c2 PE=1 SV=2	27	27	1	2	6	4	0	3	4	8	2	6	4	0	3	4	8	2	6	4	0	3	4	8	4.14286	4.14286	2.85714	0.933429	6.04757	2.85714	4.57143	3.65035	TRUE	TRUE	3	3	TRUE	3.01907	4.49205	-0.573268	-0.610471
1009	1	UBP3_MOUSE	UBP3_MOUSE		12.9	520	58869	Ubiquitin carboxyl-terminal hydrolase 3 OS=Mus musculus GN=Usp3 PE=2 SV=1	18	18	1	3	2	2	2	2	3	4	3	2	2	2	2	3	4	3	2	2	2	2	3	4	6.29386	1.01857	1.4	7.28571	4.57143	2.31629	2.42857	3.61635	TRUE	TRUE	4	3	TRUE	3.99954	3.10543	0.36504	0.468239
250	1	NLTP_MOUSE	NLTP_MOUSE		11.5	547	59127	Non-specific lipid-transfer protein OS=Mus musculus GN=Scp2 PE=1 SV=3	31	31	1	2	6	6	0	1	10	6	2	6	6	0	1	10	6	2	6	6	0	1	10	6	3.73814	3.71229	4.14286	0	2.28571	7.91429	3.28571	3.58271	TRUE	TRUE	3	3	TRUE	2.89832	4.49524	-0.63318	-0.664113
1167	1	SPCS2_MOUSE	SPCS2_MOUSE		22.6	226	24979	Signal peptidase complex subunit 2 OS=Mus musculus GN=Spcs2 PE=2 SV=1	15	15	1	3	3	2	3	2	2	0	3	3	2	3	2	2	0	3	3	2	3	2	2	0	6.46	1.57143	1.42857	9.40471	4.76	1.42857	0	3.57904	TRUE	TRUE	4	2	TRUE	4.71618	2.06286	1.19297	1.44009
1044	1	BCL7B_MOUSE	BCL7B_MOUSE		40.6	202	22239	B-cell CLL/lymphoma 7 protein family member B OS=Mus musculus GN=Bcl7b PE=1 SV=1	34	8	0.235	2	5	5	1	4	8	9	2	1	0	1	2	1	1	2	3	0	1	4	4.5	5	4.57143	1.46943	0	4.57143	7.91429	3.64286	2.85714	3.57522	TRUE	FALSE	4	3	TRUE	2.65307	4.80476	-0.856801	-0.846598
588	1	SPIN1_MOUSE	SPIN1_MOUSE		19.8	262	29644	Spindlin-1 OS=Mus musculus GN=Spin1 PE=1 SV=2	21	21	1	3	4	1	1	3	5	4	3	4	1	1	3	5	4	3	4	1	1	3	5	4	5.85714	2.28571	0.571429	4.08329	5.85714	4.02429	2.28571	3.56639	TRUE	TRUE	4	3	TRUE	3.19939	4.05571	-0.342158	-0.280411
721	1	BRD2_MOUSE	BRD2_MOUSE		14.7	798	88068	Bromodomain-containing protein 2 OS=Mus musculus GN=Brd2 PE=1 SV=1	22	21	0.955	3	4	2	0	6	5	2	3	4	2	0	6	4	2	3	4	2	0	6	4.267	2	6	2.28571	1.17	0.857143	9.94643	3.60957	0.933429	3.54318	TRUE	TRUE	3	3	TRUE	2.57821	4.82981	-0.905594	-0.933389
444	1	ATF1_MOUSE	ATF1_MOUSE		13	269	29239	Cyclic AMP-dependent transcription factor ATF-1 OS=Mus musculus GN=Atf1 PE=2 SV=1	25	15	0.6	6	5	3	3	5	2	1	4	3	2	1	2	2	1	4.471	3.857	2.4	1.2	2.6	2	1	8.78157	1.97957	1.48571	5.523	5.37143	1.14286	0.428571	3.53039	TRUE	TRUE	4	3	TRUE	4.44246	2.31429	0.940793	1.62149
655	1	CC063_MOUSE	CC063_MOUSE		11.8	1610	181397	Uncharacterized protein C3orf63 homolog OS=Mus musculus GN=D14Abb1e PE=2 SV=2	32	32	1	1	7	7	0	0	5	12	1	7	7	0	0	5	12	1	7	7	0	0	5	12	2.28571	4.57143	5.2	0.714286	0.571429	4.052	7.28571	3.5258	TRUE	TRUE	3	2	TRUE	3.19286	3.96971	-0.314187	-0.110646
1184	1	DDX56_MOUSE	DDX56_MOUSE		15.6	546	61213	Probable ATP-dependent RNA helicase DDX56 OS=Mus musculus GN=Ddx56 PE=2 SV=1	27	27	1	0	4	8	0	1	6	8	0	4	8	0	1	6	8	0	4	8	0	1	6	8	1.19043	2.35714	6.14286	2.28571	3.28571	4.71429	4.66671	3.52041	TRUE	TRUE	2	3	TRUE	2.99404	4.22224	-0.495917	-0.408751
1256	1	SENP3_MOUSE	SENP3_MOUSE		9.7	568	64404	Sentrin-specific protease 3 OS=Mus musculus GN=Senp3 PE=1 SV=1	20	20	1	0	6	1	2	1	6	4	0	6	1	2	1	6	4	0	6	1	2	1	6	4	1.42857	4.14286	0.857143	7.47957	3.32771	4.78414	2.61429	3.51918	TRUE	TRUE	3	3	TRUE	3.47704	3.57538	-0.0402391	0.257365
294	1	ERCC3_MOUSE	ERCC3_MOUSE		19.7	783	89127	TFIIH basal transcription factor complex helicase XPB subunit OS=Mus musculus GN=Ercc3 PE=2 SV=1	23	23	1	5	10	1	1	1	2	3	5	10	1	1	1	2	3	5	10	1	1	1	2	3	9.12214	6.75929	0.428571	3.426	2.28571	1.14286	1.42857	3.51331	TRUE	TRUE	4	3	TRUE	4.934	1.61905	1.60761	2.43084
995	1	IMP4_MOUSE	IMP4_MOUSE		20.6	291	33657	U3 small nucleolar ribonucleoprotein protein IMP4 OS=Mus musculus GN=Imp4 PE=2 SV=1	28	28	1	1	7	6	0	1	3	10	1	7	6	0	1	3	10	1	7	6	0	1	3	10	2.85714	4.57143	4.57143	1.42857	2.85714	2.28571	6	3.5102	TRUE	TRUE	3	3	TRUE	3.35714	3.71429	-0.145851	0.115922
1035	1	RED1_MOUSE	RED1_MOUSE		16.2	711	78002	Double-stranded RNA-specific editase 1 OS=Mus musculus GN=Adarb1 PE=2 SV=1	25	25	1	2	4	6	0	2	3	8	2	4	6	0	2	3	8	2	4	6	0	2	3	8	4.57143	2.32	4.57143	1.42857	4.59114	2.33714	4.58929	3.487	TRUE	TRUE	3	3	TRUE	3.22286	3.83919	-0.252462	-0.105149
762	1	GRWD1_MOUSE	GRWD1_MOUSE		21.5	446	49235	Glutamate-rich WD repeat-containing protein 1 OS=Mus musculus GN=Grwd1 PE=2 SV=1	31	31	1	0	5	9	0	1	5	11	0	5	9	0	1	5	11	0	5	9	0	1	5	11	0.626143	2.85714	6.46	0.857143	2.85714	4.14286	6.42857	3.46129	TRUE	TRUE	2	3	TRUE	2.70011	4.47619	-0.729255	-0.715422
980	1	KRI1_MOUSE	KRI1_MOUSE		18.2	710	82603	Protein KRI1 homolog OS=Mus musculus GN=Kri1 PE=1 SV=2	28	28	1	2	4	5	0	0	5	12	2	4	5	0	0	5	12	2	4	5	0	0	5	12	4.33043	2.31629	3.71543	1.42857	1	4.14286	7.28571	3.4599	TRUE	TRUE	3	2	TRUE	2.94768	4.14286	-0.491047	-0.399542
953	1	CO044_MOUSE	CO044_MOUSE		17.9	515	57238	UPF0464 protein C15orf44 homolog OS=Mus musculus PE=2 SV=1	18	18	1	4	3	1	0	5	3	2	4	3	1	0	5	3	2	4	3	1	0	5	3	2	7.898	1.42857	0.760429	1.366	9.22857	2.28571	1.12857	3.44227	TRUE	TRUE	3	3	TRUE	2.86325	4.21429	-0.557634	-0.517279
414	1	RS17_MOUSE	RS17_MOUSE		32.6	135	15525	40S ribosomal protein S17 OS=Mus musculus GN=Rps17 PE=1 SV=2	28	28	1	1	6	4	0	4	4	9	1	6	4	0	4	4	9	1	6	4	0	4	4	9	2.23557	3.73814	2.76514	0	7.28571	2.85714	5.2	3.44024	TRUE	TRUE	3	3	TRUE	2.18471	5.11429	-1.22709	-1.52128
945	1	SOSB1_MOUSE	SOSB1_MOUSE		17.9	212	22629	SOSS complex subunit B1 OS=Mus musculus GN=Obfc2b PE=2 SV=1	25	25	1	1	4	4	0	2	8	6	1	4	4	0	2	8	6	1	4	4	0	2	8	6	2.85714	2.28571	2.85714	1.35714	4.57143	6.44671	3.64286	3.43116	TRUE	TRUE	3	3	TRUE	2.33929	4.887	-1.06288	-1.2601
731	1	PR38B_MOUSE	PR38B_MOUSE		6.3	542	63754	Pre-mRNA-splicing factor 38B OS=Mus musculus GN=Prpf38b PE=1 SV=1	28	28	1	0	10	5	1	0	3	9	0	10	5	1	0	3	9	0	10	5	1	0	3	9	0.571429	7.28571	3.615	4.14286	0.626143	2.28571	5.40471	3.4188	TRUE	TRUE	3	2	TRUE	3.90375	2.77219	0.493834	1.09712
448	1	ELOC_MOUSE	ELOC_MOUSE		41.1	112	12474	Transcription elongation factor B polypeptide 1 OS=Mus musculus GN=Tceb1 PE=1 SV=1	30	30	1	1	6	5	0	1	8	9	1	6	5	0	1	8	9	1	6	5	0	1	8	9	2.28571	3.75	3.51943	0.285714	2.33929	6.28571	5.294	3.39427	TRUE	TRUE	3	3	TRUE	2.46021	4.63967	-0.915237	-0.772661
672	1	TNPO3_MOUSE	TNPO3_MOUSE		11.4	923	104171	Transportin-3 OS=Mus musculus GN=Tnpo3 PE=1 SV=1	29	29	1	1	6	6	0	1	5	10	1	6	6	0	1	5	10	1	6	6	0	1	5	10	2.28571	3.91671	4.28571	0.714286	2.60971	4.08329	5.85714	3.39322	TRUE	TRUE	3	3	TRUE	2.80061	4.18338	-0.57893	-0.516846
552	1	MDC1_MOUSE	MDC1_MOUSE		8.1	1707	184671	Mediator of DNA damage checkpoint protein 1 OS=Mus musculus GN=Mdc1 PE=1 SV=1	14	14	1	6	0	0	1	3	3	1	6	0	0	1	3	3	1	6	0	0	1	3	3	1	11.173	0	0	3.91671	5.85714	2.28571	0.428571	3.38016	TRUE	TRUE	2	3	TRUE	3.77243	2.85714	0.40092	0.404975
1158	1	SSRA_MOUSE	SSRA_MOUSE		21	286	32066	Translocon-associated protein subunit alpha OS=Mus musculus GN=Ssr1 PE=1 SV=1	20	20	1	2	8	1	1	0	5	3	2	8	1	1	0	5	3	2	8	1	1	0	5	3	4.57143	5.85714	0.857143	4.77686	1.28571	4.25714	1.87243	3.35398	TRUE	TRUE	4	2	TRUE	4.01564	2.47176	0.700091	0.637078
428	1	ZHX1_MOUSE	ZHX1_MOUSE		11.9	873	97552	Zinc fingers and homeoboxes protein 1 OS=Mus musculus GN=Zhx1 PE=1 SV=2	23	23	1	3	4	5	1	1	5	4	3	4	5	1	1	5	4	3	4	5	1	1	5	4	5.57086	2.28571	3.35943	3.71543	2.33329	3.87214	2.28571	3.34608	TRUE	TRUE	4	3	TRUE	3.73286	2.83038	0.399284	0.406309
604	1	K1H1_MOUSE	K1H1_MOUSE		21.2	416	47118	Keratin, type I cuticular Ha1 OS=Mus musculus GN=Krt31 PE=2 SV=2	53	5	0.094	12	14	7	1	16	3	0	1	1	0	0	3	0	0	1.704	9.036	0	0	8.265	0	0	3.426	6.43371	0	0.571429	12.9664	0	0	3.34251	TRUE	FALSE	4	2	TRUE	2.60779	4.32214	-0.728921	-0.62829
227	1	RS2_MOUSE	RS2_MOUSE		24.9	293	31232	40S ribosomal protein S2 OS=Mus musculus GN=Rps2 PE=1 SV=3	31	31	1	3	4	8	0	0	4	12	3	4	8	0	0	4	12	3	4	8	0	0	4	12	5.42857	2.25	5.85714	0	0	2.85714	6.85714	3.32143	TRUE	TRUE	3	2	TRUE	3.38393	3.2381	0.0635537	0.00230344
515	1	DDB1_MOUSE	DDB1_MOUSE		11	1140	126854	DNA damage-binding protein 1 OS=Mus musculus GN=Ddb1 PE=1 SV=2	29	29	1	0	6	6	1	0	7	9	0	6	6	1	0	7	9	0	6	6	1	0	7	9	0.285714	3.80957	4.14286	3.85714	0.285714	5.42857	5.30257	3.30173	TRUE	TRUE	3	2	TRUE	3.02382	3.67229	-0.280305	-0.296498
1266	1	FL2D_MOUSE	FL2D_MOUSE		20.7	396	44178	Pre-mRNA-splicing regulator WTAP OS=Mus musculus GN=Wtap PE=2 SV=3	19	19	1	2	4	2	0	3	2	6	2	4	2	0	3	2	6	2	4	2	0	3	2	6	4.66671	2.37143	1.42857	2.42857	6.83329	1.57143	3.75157	3.29308	TRUE	TRUE	3	3	TRUE	2.72382	4.0521	-0.573036	-0.572162
359	1	1433G_MOUSE	1433G_MOUSE		36.4	247	28304	14-3-3 protein gamma OS=Mus musculus GN=Ywhag PE=1 SV=2	46	14	0.304	6	9	4	6	5	8	8	0	3	1	1	3	2	4	0	5.364	1.143	1.385	3.75	3.455	5.868	0	3.48057	0.877571	5.555	7.25	2.565	3.26686	3.285	TRUE	FALSE	4	3	TRUE	2.47829	4.36062	-0.81519	-0.841607
213	1	FGFR2_MOUSE	FGFR2_MOUSE		1.9	821	91985	Fibroblast growth factor receptor 2 OS=Mus musculus GN=Fgfr2 PE=2 SV=4	30	11	0.367	3	3	8	7	0	6	3	3	0	1	6	0	1	0	3	0	2.75	6.75	0	1.417	0	5.40814	0	1.53571	14.9643	0	1.05957	0	3.2811	TRUE	TRUE	4	2	TRUE	5.47704	0.35319	3.95488	3.13226
392	1	RS28_MOUSE	RS28_MOUSE		46.4	69	7842	40S ribosomal protein S28 OS=Mus musculus GN=Rps28 PE=2 SV=1	15	15	1	4	2	2	3	2	1	1	4	2	2	3	2	1	1	4	2	2	3	2	1	1	7.28571	0.857143	1.14286	8.36629	4.14286	0.657143	0.428571	3.26865	TRUE	TRUE	4	3	TRUE	4.413	1.74286	1.34031	0.950562
918	1	PO121_MOUSE	PO121_MOUSE		5.5	1200	121023	Nuclear envelope pore membrane protein POM 121 OS=Mus musculus GN=Pom121 PE=1 SV=2	20	20	1	2	2	4	1	2	2	7	2	2	4	1	2	2	7	2	2	4	1	2	2	7	4.28571	1	2.85714	4.57143	4.57143	1.42857	4.14286	3.26531	TRUE	TRUE	4	3	TRUE	3.17857	3.38095	-0.0890512	-0.28346
889	1	CP2DQ_MOUSE	CP2DQ_MOUSE		16.4	500	56977	Cytochrome P450 2D26 OS=Mus musculus GN=Cyp2d26 PE=1 SV=1	28	24	0.857	2	7	8	0	0	4	7	2	6	7	0	0	3	6	2	6.75	7.5	0	0	3.75	6.545	4.25714	4.25	5.555	1.14286	0.857143	2.76514	4.02429	3.26451	TRUE	TRUE	3	2	TRUE	3.80125	2.54886	0.576623	0.294564
115	1	RL35A_MOUSE	RL35A_MOUSE		31.8	110	12555	60S ribosomal protein L35a OS=Mus musculus GN=Rpl35a PE=2 SV=2	24	24	1	2	4	3	0	5	8	2	2	4	3	0	5	8	2	2	4	3	0	5	8	2	3.615	2.17457	1.57143	0	8.46429	6.14286	0.857143	3.26076	TRUE	TRUE	3	3	TRUE	1.84025	5.15476	-1.486	-1.44722
1068	1	RFC4_MOUSE	RFC4_MOUSE		21.2	364	39868	Replication factor C subunit 4 OS=Mus musculus GN=Rfc4 PE=1 SV=1	20	20	1	2	8	6	1	0	1	2	2	8	6	1	0	1	2	2	8	6	1	0	1	2	4.57143	5.85714	4.57143	4.66671	1.14286	0.857143	1.14286	3.25851	TRUE	TRUE	4	2	TRUE	4.91668	1.04762	2.23057	1.58909
144	1	SP1_MOUSE	SP1_MOUSE		12.9	784	80733	Transcription factor Sp1 OS=Mus musculus GN=Sp1 PE=1 SV=2	23	23	1	4	4	3	0	4	3	5	4	4	3	0	4	3	5	4	4	3	0	4	3	5	7.02	2.19043	1.57143	0	7.28571	1.881	2.85714	3.25796	TRUE	TRUE	3	3	TRUE	2.69546	4.00795	-0.572332	-0.711982
851	1	AROS_MOUSE	AROS_MOUSE		31.5	143	15979	Active regulator of SIRT1 OS=Mus musculus GN=Rps19bp1 PE=1 SV=1	17	17	1	3	4	1	1	3	1	4	3	4	1	1	3	1	4	3	4	1	1	3	1	4	6.14286	2.28571	0.714286	4.30257	6.14286	0.857143	2.35714	3.25751	TRUE	TRUE	4	3	TRUE	3.36136	3.11905	0.107938	-0.00768944
1124	1	RING2_MOUSE	RING2_MOUSE		19.3	336	37624	E3 ubiquitin-protein ligase RING2 OS=Mus musculus GN=Rnf2 PE=1 SV=1	29	21	0.724	1	6	5	0	0	7	10	1	5	3	0	0	7	5	1	5.625	4	0	0	7	7.778	2.85714	3.53371	2.85714	1.96429	1.15014	5.90471	4.46829	3.24792	TRUE	TRUE	3	2	TRUE	2.80307	3.84105	-0.454491	-0.407737
1005	1	DDX41_MOUSE	DDX41_MOUSE		12.5	622	69778	Probable ATP-dependent RNA helicase DDX41 OS=Mus musculus GN=Ddx41 PE=1 SV=1	19	19	1	1	5	1	2	1	4	5	1	5	1	2	1	4	5	1	5	1	2	1	4	5	2.85714	2.85714	0.857143	7.28571	2.85714	3.00486	2.85714	3.22518	TRUE	TRUE	4	3	TRUE	3.46429	2.90638	0.253334	0.0422099
1085	1	CDS2_MOUSE	CDS2_MOUSE		10.4	444	51315	Phosphatidate cytidylyltransferase 2 OS=Mus musculus GN=Cds2 PE=1 SV=1	18	18	1	2	5	4	1	2	2	2	2	5	4	1	2	2	2	2	5	4	1	2	2	2	4.57143	3.11729	2.85714	4.71429	4.71429	1.42857	1.14286	3.22084	TRUE	TRUE	4	3	TRUE	3.81504	2.42857	0.651589	0.287722
1373	1	MD2L1_MOUSE	MD2L1_MOUSE		22.9	205	23599	Mitotic spindle assembly checkpoint protein MAD2A OS=Mus musculus GN=Mad2l1 PE=2 SV=2	22	22	1	1	4	2	0	0	5	10	1	4	2	0	0	5	10	1	4	2	0	0	5	10	3.28571	2.42857	1.42857	2.85714	2	4.28571	6.14286	3.20408	TRUE	TRUE	3	2	TRUE	2.5	4.14286	-0.728698	-0.677935
417	1	RS12_MOUSE	RS12_MOUSE		14.4	132	14526	40S ribosomal protein S12 OS=Mus musculus GN=Rps12 PE=1 SV=2	26	26	1	0	5	6	2	0	7	6	0	5	6	2	0	7	6	0	5	6	2	0	7	6	0	2.85714	4.14286	6.23814	0	5.42857	3.29243	3.13702	TRUE	TRUE	3	2	TRUE	3.30954	2.907	0.187098	0.191759
1114	1	MED21_MOUSE	MED21_MOUSE		39.6	144	15589	Mediator of RNA polymerase II transcription subunit 21 OS=Mus musculus GN=Med21 PE=1 SV=1	22	22	1	0	6	4	1	0	5	6	0	6	4	1	0	5	6	0	6	4	1	0	5	6	1.14286	4.14286	2.85714	4.71429	1.14286	4.20414	3.71429	3.1312	TRUE	TRUE	3	2	TRUE	3.21429	3.02043	0.0897449	0.125981
1135	1	CS029_MOUSE	CS029_MOUSE		6.7	772	90662	Uncharacterized protein C19orf29 homolog OS=Mus musculus PE=1 SV=2	22	22	1	1	6	6	0	1	1	7	1	6	6	0	1	1	7	1	6	6	0	1	1	7	2.85714	4.14286	4.57143	2	3.11729	0.864571	4.28571	3.11986	TRUE	TRUE	3	3	TRUE	3.39286	2.75586	0.3	0.339769
180	1	FABPL_MOUSE	FABPL_MOUSE		59.1	127	14247	Fatty acid-binding protein, liver OS=Mus musculus GN=Fabp1 PE=1 SV=2	27	27	1	1	5	14	1	0	4	2	1	5	14	1	0	4	2	1	5	14	1	0	4	2	1.85714	2.85714	10.1034	3.28571	0	2.85714	0.857143	3.11682	TRUE	TRUE	4	2	TRUE	4.52586	1.2381	1.87007	1.63301
1016	1	STRBP_MOUSE	STRBP_MOUSE		25.4	672	73706	Spermatid perinuclear RNA-binding protein OS=Mus musculus GN=Strbp PE=1 SV=1	172	20	0.116	19	26	37	15	20	21	34	1	2	5	0	0	4	8	1.316	2.696	6.975	0	0	4.986	10.93	3.35943	1.24229	4.71071	1.42857	1.01857	3.71229	6.27571	3.1068	TRUE	FALSE	4	3	TRUE	2.68525	3.66886	-0.450274	-0.349095
530	1	SELH_MOUSE	SELH_MOUSE		37.1	116	12993	Selenoprotein H OS=Mus musculus GN=Selh PE=2 SV=2	31	31	1	0	2	1	0	0	13	15	0	2	1	0	0	13	15	0	2	1	0	0	13	15	0.285714	0.857143	0.571429	0.428571	0.285714	10.2857	9	3.10204	TRUE	TRUE	2	2	TRUE	0.535714	6.52381	-3.60618	-3.32896
1188	1	ZN706_MOUSE	ZN706_MOUSE		30.3	76	8499	Zinc finger protein 706 OS=Mus musculus GN=Znf706 PE=2 SV=1	11	11	1	1	0	2	3	3	2	0	1	0	2	3	3	2	0	1	0	2	3	3	2	0	2.85714	0	1.42857	9.42857	6.51943	1.42857	0	3.09461	TRUE	TRUE	3	2	TRUE	3.42857	2.64933	0.371978	0.278363
1227	1	QCR2_MOUSE	QCR2_MOUSE		13.7	453	48236	Cytochrome b-c1 complex subunit 2, mitochondrial OS=Mus musculus GN=Uqcrc2 PE=1 SV=1	13	13	1	4	2	2	0	3	2	0	4	2	2	0	3	2	0	4	2	2	0	3	2	0	8.42357	1.14286	1.42857	2.28571	6.68943	1.50743	0	3.06822	TRUE	TRUE	3	2	TRUE	3.32018	2.73229	0.281152	-0.0305936
45	1	MED12_MOUSE	MED12_MOUSE		7.4	2190	244562	Mediator of RNA polymerase II transcription subunit 12 OS=Mus musculus GN=Med12 PE=2 SV=1	28	28	1	1	9	7	0	1	6	4	1	9	7	0	1	6	4	1	9	7	0	1	6	4	1.72929	6	4.71429	0	2.14286	4.57143	2.28571	3.06337	TRUE	TRUE	3	3	TRUE	3.11089	3	0.0523662	-0.19524
1318	1	GNMT_MOUSE	GNMT_MOUSE		10.2	293	32676	Glycine N-methyltransferase OS=Mus musculus GN=Gnmt PE=1 SV=3	21	21	1	1	4	8	0	0	0	8	1	4	8	0	0	0	8	1	4	8	0	0	0	8	3.11729	2.42857	6.28571	2.85714	1.57143	0.428571	4.71429	3.05757	TRUE	TRUE	3	1	TRUE	3.67218	2.2381	0.714365	0.257307
877	1	EP400_MOUSE	EP400_MOUSE		9	3072	337151	E1A-binding protein p400 OS=Mus musculus GN=Ep400 PE=1 SV=2	22	22	1	2	3	2	0	2	5	8	2	3	2	0	2	5	8	2	3	2	0	2	5	8	4.25	1.42857	1.29243	1.14286	4.57143	4.14286	4.57143	3.05708	TRUE	TRUE	3	3	TRUE	2.02846	4.42857	-1.12645	-0.945785
1350	1	PHF2_MOUSE	PHF2_MOUSE		9.9	1096	120815	PHD finger protein 2 OS=Mus musculus GN=Phf2 PE=1 SV=2	20	20	1	1	3	3	0	0	4	9	1	3	3	0	0	4	9	1	3	3	0	0	4	9	3.22857	1.85714	2.28571	2.85714	1.881	3.426	5.64871	3.02633	TRUE	TRUE	3	2	TRUE	2.55714	3.6519	-0.514116	-0.595733
216	1	PGH1_MOUSE	PGH1_MOUSE		8.1	602	69043	Prostaglandin G/H synthase 1 OS=Mus musculus GN=Ptgs1 PE=2 SV=1	26	26	1	1	7	3	1	1	4	9	1	7	3	1	1	4	9	1	7	3	1	1	4	9	1.91157	4.28571	1.579	3.29243	2.28571	2.85714	4.873	3.01208	TRUE	TRUE	4	3	TRUE	2.76718	3.33862	-0.270836	-0.383217
455	1	FRG1_MOUSE	FRG1_MOUSE		20.2	258	29128	Protein FRG1 OS=Mus musculus GN=Frg1 PE=1 SV=2	22	22	1	0	5	4	3	0	5	5	0	5	4	3	0	5	5	0	5	4	3	0	5	5	0	2.85714	2.8	8.59914	0	3.884	2.85714	2.99963	TRUE	TRUE	3	2	TRUE	3.56407	2.24705	0.665496	0.18103
372	1	RS13_MOUSE	RS13_MOUSE		20.5	151	17223	40S ribosomal protein S13 OS=Mus musculus GN=Rps13 PE=1 SV=2	22	22	1	1	6	5	1	1	7	1	1	6	5	1	1	7	1	1	6	5	1	1	7	1	2.17457	3.724	3.29914	3.64286	2.28571	5.40471	0.428571	2.99422	TRUE	TRUE	4	3	TRUE	3.21014	2.70633	0.246298	0.0039176
984	1	NAA40_MOUSE	NAA40_MOUSE		35	237	27230	N-alpha-acetyltransferase 40, NatD catalytic subunit OS=Mus musculus GN=Naa40 PE=2 SV=1	11	11	1	2	0	2	4	1	0	2	2	0	2	4	1	0	2	2	0	2	4	1	0	2	4.42443	0	1.381	11	2.85714	0	1.14286	2.9722	TRUE	TRUE	3	2	TRUE	4.20136	1.33333	1.65582	0.815489
581	1	NCOR1_MOUSE	NCOR1_MOUSE		4.1	2453	270643	Nuclear receptor corepressor 1 OS=Mus musculus GN=Ncor1 PE=1 SV=1	12	12	1	3	1	1	3	2	1	1	3	1	1	3	2	1	1	3	1	1	3	2	1	1	5.85714	0.285714	0.571429	8.72243	4.20886	0.714286	0.428571	2.96978	TRUE	TRUE	4	3	TRUE	3.85918	1.7839	1.11326	0.451889
576	1	DBP_MOUSE	DBP_MOUSE		19.7	325	34381	D site-binding protein OS=Mus musculus GN=Dbp PE=2 SV=2	22	22	1	1	7	13	1	0	0	0	1	7	13	1	0	0	0	1	7	13	1	0	0	0	2.28571	4.57143	9.42857	4.052	0.428571	0	0	2.96661	TRUE	TRUE	4	0	TRUE	5.08443	0.142857	5.15344	3.35845
143	1	RBM3_MOUSE	RBM3_MOUSE		32	153	16606	Putative RNA-binding protein 3 OS=Mus musculus GN=Rbm3 PE=1 SV=1	23	23	1	1	5	6	2	0	5	4	1	5	6	2	0	5	4	1	5	6	2	0	5	4	1.85714	2.85714	4.14286	5.85714	0	3.724	2.28571	2.96057	TRUE	TRUE	4	2	TRUE	3.67857	2.00324	0.876812	0.330723
838	1	TAF5_MOUSE	TAF5_MOUSE		13.9	801	87046	Transcription initiation factor TFIID subunit 5 OS=Mus musculus GN=Taf5 PE=2 SV=1	18	18	1	3	1	4	0	2	5	3	3	1	4	0	2	5	3	3	1	4	0	2	5	3	6.07257	0.428571	2.85714	1.07143	4.57143	4.14286	1.57143	2.95935	TRUE	TRUE	3	3	TRUE	2.60743	3.42857	-0.39498	-0.56632
1055	1	PDIA6_MOUSE	PDIA6_MOUSE		13.4	440	48101	Protein disulfide-isomerase A6 OS=Mus musculus GN=Pdia6 PE=1 SV=3	20	20	1	0	1	8	1	1	2	7	0	1	8	1	1	2	7	0	1	8	1	1	2	7	1.07143	0.428571	6.04757	4.58929	2.85714	1.42857	4.25	2.95322	TRUE	TRUE	3	3	TRUE	3.03421	2.84524	0.0927736	-0.181272
156	1	ALBU_MOUSE	ALBU_MOUSE		14.5	608	68694	Serum albumin OS=Mus musculus GN=Alb PE=1 SV=3	24	24	1	4	13	2	0	0	3	2	4	13	2	0	0	3	2	4	13	2	0	0	3	2	7.02143	9.71429	1.00457	0	0	1.91043	0.857143	2.92969	TRUE	TRUE	3	2	TRUE	4.43507	0.922524	2.2653	1.28654
301	1	RAB7A_MOUSE	RAB7A_MOUSE		47.3	207	23491	Ras-related protein Rab-7a OS=Mus musculus GN=Rab7a PE=1 SV=2	24	24	1	2	2	3	0	2	7	8	2	2	3	0	2	7	8	2	2	3	0	2	7	8	3.80957	0.857143	1.75	0	4.14286	5.33543	4.57143	2.92378	TRUE	TRUE	3	3	TRUE	1.60418	4.68324	-1.54567	-1.23492
312	1	HMGA2_MOUSE	HMGA2_MOUSE		57.4	108	11820	High mobility group protein HMGI-C OS=Mus musculus GN=Hmga2 PE=1 SV=1	14	14	1	4	1	2	1	4	0	2	4	1	2	1	4	0	2	4	1	2	1	4	0	2	7.28571	0.285714	1.12857	3.556	7.28571	0	0.857143	2.91412	TRUE	TRUE	4	2	TRUE	3.064	2.71429	0.174844	-0.127663
648	1	USF2_MOUSE	USF2_MOUSE		7.5	346	36955	Upstream stimulatory factor 2 OS=Mus musculus GN=Usf2 PE=1 SV=1	37	15	0.405	1	8	8	2	0	9	9	0	3	4	0	0	4	4	0	5.143	6.667	0	0	7.333	8	0.428571	3.32771	4.66671	0.642857	0.571429	6.04757	4.57143	2.89376	TRUE	TRUE	4	2	TRUE	2.26646	3.73014	-0.718787	-0.637984
1333	1	NXT1_MOUSE	NXT1_MOUSE		35.7	140	15848	NTF2-related export protein 1 OS=Mus musculus GN=Nxt1 PE=1 SV=2	24	11	0.458	0	9	6	0	1	2	6	0	5	2	0	0	0	4	0	8.333	6	0	0	0	5.6	1.42857	5.90471	4.57143	2.85714	1.75	0.428571	3.22857	2.88129	TRUE	TRUE	2	3	TRUE	3.69046	1.80238	1.0339	0.503105
332	1	ACTN4_MOUSE	ACTN4_MOUSE		13.3	912	104978	Alpha-actinin-4 OS=Mus musculus GN=Actn4 PE=1 SV=1	31	31	1	0	8	9	0	0	3	11	0	8	9	0	0	3	11	0	8	9	0	0	3	11	0	5.37143	6.42857	0	0	2	6.33329	2.87618	TRUE	TRUE	2	2	TRUE	2.95	2.77776	0.086792	0.0191515
1133	1	EXOS5_MOUSE	EXOS5_MOUSE		32.8	235	25195	Exosome complex exonuclease RRP46 OS=Mus musculus GN=Exosc5 PE=1 SV=1	22	22	1	1	3	5	0	0	4	9	1	3	5	0	0	4	9	1	3	5	0	0	4	9	2.85714	1.50743	3.75	2	1.19643	3.28571	5.523	2.87424	TRUE	TRUE	3	2	TRUE	2.52864	3.33505	-0.399344	-0.211904
235	1	XRCC5_MOUSE	XRCC5_MOUSE		10.4	732	83058	X-ray repair cross-complementing protein 5 OS=Mus musculus GN=Xrcc5 PE=2 SV=4	23	23	1	3	3	4	0	2	3	8	3	3	4	0	2	3	8	3	3	4	0	2	3	8	5.42857	1.366	2.57143	0	4.14286	1.96429	4.57143	2.86351	TRUE	TRUE	3	3	TRUE	2.3415	3.55952	-0.604251	-0.301478
344	1	MO4L1_MOUSE	MO4L1_MOUSE		26.2	362	41494	Mortality factor 4-like protein 1 OS=Mus musculus GN=Morf4l1 PE=2 SV=2	17	15	0.882	2	2	5	1	3	3	1	2	1	5	1	3	2	1	2	2	5	1	3	3	1	3.87214	0.857143	3.29043	3.615	5.85714	2.14286	0.285714	2.84578	TRUE	TRUE	4	3	TRUE	2.90868	2.7619	0.0747003	0.381887
105	1	BYST_MOUSE	BYST_MOUSE		15.1	436	49785	Bystin OS=Mus musculus GN=Bysl PE=1 SV=3	31	31	1	0	8	7	0	0	7	9	0	8	7	0	0	7	9	0	8	7	0	0	7	9	0	5.02386	4.71429	0	0	5.28914	4.85714	2.84063	TRUE	TRUE	2	2	TRUE	2.43454	3.3821	-0.474271	-0.154994
321	1	RRP1_MOUSE	RRP1_MOUSE		11.3	494	54778	Ribosomal RNA processing protein 1 homolog A OS=Mus musculus GN=Rrp1 PE=2 SV=2	20	20	1	1	2	1	0	6	5	5	1	2	1	0	6	5	5	1	2	1	0	6	5	5	2.14286	0.857143	0.428571	0	9.71429	3.75	2.85714	2.82143	TRUE	TRUE	3	3	TRUE	0.857143	5.44048	-2.66613	-1.83262
585	1	USF1_MOUSE	USF1_MOUSE		16.1	310	33571	Upstream stimulatory factor 1 OS=Mus musculus GN=Usf1 PE=2 SV=1	32	10	0.313	1	9	6	3	0	7	6	0	4	2	1	0	2	1	0	6.857	3.333	3	0	3.667	2	0.285714	4.26529	2.33329	8.72729	0.428571	2.62929	0.877571	2.79243	TRUE	FALSE	4	2	TRUE	3.90289	1.31181	1.57299	1.84764
1118	1	MED4_MOUSE	MED4_MOUSE		31.5	270	29782	Mediator of RNA polymerase II transcription subunit 4 OS=Mus musculus GN=Med4 PE=2 SV=1	22	22	1	0	4	6	0	0	6	6	0	4	6	0	0	6	6	0	4	6	0	0	6	6	1.14286	2.347	4.57143	1.91071	1.14286	4.71429	3.71543	2.79208	TRUE	TRUE	2	2	TRUE	2.493	3.19086	-0.356061	-0.029424
1204	1	NOSIP_MOUSE	NOSIP_MOUSE		23.9	301	33210	Nitric oxide synthase-interacting protein OS=Mus musculus GN=Nosip PE=2 SV=1	14	14	1	2	1	0	0	3	1	7	2	1	0	0	3	1	7	2	1	0	0	3	1	7	4.57143	0.571429	0.285714	2.28571	6.54943	0.897571	4.28571	2.77814	TRUE	TRUE	2	3	TRUE	1.92857	3.9109	-1.01997	-0.569576
486	1	CO6A1_MOUSE	CO6A1_MOUSE		10.4	1025	108490	Collagen alpha-1(VI) chain OS=Mus musculus GN=Col6a1 PE=2 SV=1	18	18	1	1	6	0	0	6	4	1	1	6	0	0	6	4	1	1	6	0	0	6	4	1	2.28571	3.76186	0	0.285714	9.73657	2.85714	0.428571	2.76508	TRUE	TRUE	2	3	TRUE	1.58332	4.34076	-1.45499	-0.968699
704	1	FNBP4_MOUSE	FNBP4_MOUSE		11.9	1031	111246	Formin-binding protein 4 OS=Mus musculus GN=Fnbp4 PE=1 SV=2	23	23	1	1	3	2	0	2	4	11	1	3	2	0	2	4	11	1	3	2	0	2	4	11	2.33329	1.42857	1.14886	0.857143	4.28571	2.85714	6.42857	2.76276	TRUE	TRUE	3	3	TRUE	1.44196	4.52381	-1.6495	-1.1216
512	1	NOL9_MOUSE	NOL9_MOUSE		17.2	714	80841	Nucleolar protein 9 OS=Mus musculus GN=Nol9 PE=2 SV=1	25	25	1	0	6	4	0	1	7	7	0	6	4	0	1	7	7	0	6	4	0	1	7	7	0.285714	3.803	2.84614	0.428571	2.35714	5.42857	4.14286	2.756	TRUE	TRUE	2	3	TRUE	1.84086	3.97619	-1.11101	-0.646371
736	1	PGRC2_MOUSE	PGRC2_MOUSE		27.6	217	23335	Membrane-associated progesterone receptor component 2 OS=Mus musculus GN=Pgrmc2 PE=1 SV=2	49	20	0.408	6	13	10	3	3	6	8	1	8	4	0	0	2	5	1.094	9.053	4.686	0	0	2.151	5.319	3.29914	6.43614	3.14357	0.857143	0.642857	1.73586	3.14357	2.75118	TRUE	TRUE	4	3	TRUE	3.434	1.84076	0.899587	1.1074
857	1	ELOA1_MOUSE	ELOA1_MOUSE		12	773	87178	Transcription elongation factor B polypeptide 3 OS=Mus musculus GN=Tceb3 PE=1 SV=2	23	23	1	0	2	4	0	1	5	11	0	2	4	0	1	5	11	0	2	4	0	1	5	11	0.857143	0.933429	2.85714	1.14286	2.85714	4.14286	6.44671	2.74818	TRUE	TRUE	2	3	TRUE	1.44764	4.48224	-1.63051	-1.14774
71	1	HCD2_MOUSE	HCD2_MOUSE		18.8	261	27420	3-hydroxyacyl-CoA dehydrogenase type-2 OS=Mus musculus GN=Hsd17b10 PE=1 SV=4	19	19	1	1	2	7	3	0	5	1	1	2	7	3	0	5	1	1	2	7	3	0	5	1	1.76186	0.714286	4.71429	8	0	3.71543	0.285714	2.74165	TRUE	TRUE	4	2	TRUE	3.79761	1.33371	1.50964	1.62653
755	1	KDM5B_MOUSE	KDM5B_MOUSE		1.8	1544	175556	Lysine-specific demethylase 5B OS=Mus musculus GN=Kdm5b PE=1 SV=1	17	17	1	1	1	4	0	5	1	5	1	1	4	0	5	1	5	1	1	4	0	5	1	5	2.35714	0.285714	2.85714	0.857143	9	0.857143	2.85714	2.72449	TRUE	TRUE	3	3	TRUE	1.58929	4.2381	-1.41504	-0.920669
698	1	ONEC2_MOUSE	ONEC2_MOUSE		8.7	505	54555	One cut domain family member 2 OS=Mus musculus GN=Onecut2 PE=2 SV=2	25	25	1	0	6	6	0	0	6	7	0	6	6	0	0	6	7	0	6	6	0	0	6	7	0.571429	3.99629	4.28571	0.821429	0.571429	4.57143	4.14286	2.70865	TRUE	TRUE	2	2	TRUE	2.41871	3.09524	-0.35581	-0.108857
92	1	BHMT1_MOUSE	BHMT1_MOUSE		28.3	407	45022	Betaine--homocysteine S-methyltransferase 1 OS=Mus musculus GN=Bhmt PE=2 SV=1	20	20	1	2	6	4	2	0	1	5	2	6	4	2	0	1	5	2	6	4	2	0	1	5	3.556	3.60957	2.42857	5.85714	0	0.571429	2.85714	2.69712	TRUE	TRUE	4	2	TRUE	3.86282	1.14286	1.75701	2.25915
1019	1	ASH2L_MOUSE	ASH2L_MOUSE		12.5	623	68251	Set1/Ash2 histone methyltransferase complex subunit ASH2 OS=Mus musculus GN=Ash2l PE=1 SV=1	22	22	1	0	6	4	0	0	5	7	0	6	4	0	0	5	7	0	6	4	0	0	5	7	1	4.14286	2.85714	1.42857	1.03571	4.14286	4.22443	2.69022	TRUE	TRUE	2	2	TRUE	2.35714	3.13433	-0.411119	-0.172928
906	1	INT10_MOUSE	INT10_MOUSE		14.5	710	82021	Integrator complex subunit 10 OS=Mus musculus GN=Ints10 PE=1 SV=3	20	20	1	1	4	6	0	1	3	5	1	4	6	0	1	3	5	1	4	6	0	1	3	5	2.76514	2.28571	4.46829	1.14886	2.85714	2.28571	2.85714	2.66686	TRUE	TRUE	3	3	TRUE	2.667	2.66667	0.000180326	0.141345
1229	1	NGDN_MOUSE	NGDN_MOUSE		7.6	315	35660	Neuroguidin OS=Mus musculus GN=Ngdn PE=1 SV=1	13	13	1	1	2	1	1	1	5	2	1	2	1	1	1	5	2	1	2	1	1	1	5	2	2.85714	1.14286	0.857143	5.02386	3.28571	4.28571	1.14286	2.65647	TRUE	TRUE	4	3	TRUE	2.47025	2.90476	-0.233763	-0.14825
752	1	BDH_MOUSE	BDH_MOUSE		27.7	343	38286	D-beta-hydroxybutyrate dehydrogenase, mitochondrial OS=Mus musculus GN=Bdh1 PE=1 SV=1	24	24	1	0	5	9	0	0	7	3	0	5	9	0	0	7	3	0	5	9	0	0	7	3	0.571429	2.85714	6.44671	0.857143	0.714286	5.57086	1.50743	2.64643	TRUE	TRUE	2	2	TRUE	2.68311	2.59752	0.0467677	-0.00295837
739	1	INT8_MOUSE	INT8_MOUSE		8.4	995	113354	Integrator complex subunit 8 OS=Mus musculus GN=Ints8 PE=2 SV=1	14	14	1	2	0	3	1	2	3	3	2	0	3	1	2	3	3	2	0	3	1	2	3	3	4.14286	0	2.14286	4.14286	4.28571	2.28571	1.48571	2.64082	TRUE	TRUE	3	3	TRUE	2.60714	2.68571	-0.0428362	-0.1584
516	1	BRE1B_MOUSE	BRE1B_MOUSE		10.5	1001	113968	E3 ubiquitin-protein ligase BRE1B OS=Mus musculus GN=Rnf40 PE=2 SV=2	19	14	0.737	1	7	3	1	2	2	3	1	4	3	1	2	1	2	1	5.2	3	1	2	2	2.667	2.28571	3.35943	1.87243	3.87214	4.14286	1.17	1.381	2.58337	TRUE	TRUE	4	3	TRUE	2.84743	2.23129	0.351784	0.230329
1277	1	DDX24_MOUSE	DDX24_MOUSE		11.3	857	96472	ATP-dependent RNA helicase DDX24 OS=Mus musculus GN=Ddx24 PE=1 SV=1	16	16	1	0	4	2	0	1	6	3	0	4	2	0	1	6	3	0	4	2	0	1	6	3	1.42857	2.41171	1.42857	2.47271	3.48057	4.85714	1.97957	2.57984	TRUE	TRUE	2	3	TRUE	1.93539	3.4391	-0.829403	-1.06906
865	1	PPWD1_MOUSE	PPWD1_MOUSE		20.9	646	73432	Peptidylprolyl isomerase domain and WD repeat-containing protein 1 OS=Mus musculus GN=Ppwd1 PE=2 SV=1	18	18	1	1	3	5	0	2	3	4	1	3	5	0	2	3	4	1	3	5	0	2	3	4	2.57486	1.42857	3.66171	1.14286	4.57143	2.28571	2.35714	2.57461	TRUE	TRUE	3	3	TRUE	2.202	3.07143	-0.480095	-0.679149
1252	1	S38A3_MOUSE	S38A3_MOUSE		4.8	505	55593	Sodium-coupled neutral amino acid transporter 3 OS=Mus musculus GN=Slc38a3 PE=1 SV=1	14	14	1	1	2	4	0	2	3	2	1	2	4	0	2	3	2	1	2	4	0	2	3	2	2.85714	1.14286	2.85714	2.35714	4.873	2.42857	1.14886	2.52353	TRUE	TRUE	3	3	TRUE	2.30357	2.81681	-0.29019	-0.652028
880	1	INT5_MOUSE	INT5_MOUSE		9.4	1018	108349	Integrator complex subunit 5 OS=Mus musculus GN=Ints5 PE=2 SV=1	23	18	0.783	1	5	4	0	2	5	6	0	4	4	0	1	4	5	0	4.028	4	0	1.008	4.03	5.034	0.857143	2.43257	2.85714	1.14286	3.71543	3.51943	3.00486	2.5042	TRUE	TRUE	3	3	TRUE	1.82243	3.41324	-0.905279	-1.14142
380	1	PRS10_MOUSE	PRS10_MOUSE		13.6	389	44174	26S protease regulatory subunit 10B OS=Mus musculus GN=Psmc6 PE=1 SV=1	16	16	1	1	7	2	3	0	2	1	1	7	2	3	0	2	1	1	7	2	3	0	2	1	2.18186	4.30257	1.14286	8.19643	0	1.14286	0.428571	2.48502	FALSE	TRUE	4	2	TRUE	3.95593	0.52381	2.9169	2.13985
1243	1	CP4V3_MOUSE	CP4V3_MOUSE		16.8	525	60940	Cytochrome P450 4V3 OS=Mus musculus GN=Cyp4v3 PE=1 SV=1	12	12	1	0	0	4	1	1	4	2	0	0	4	1	1	4	2	0	0	4	1	1	4	2	1.381	0	2.85714	5.2	3.29243	3.29914	1.14286	2.45322	FALSE	TRUE	2	3	TRUE	2.35954	2.57814	-0.127829	-0.478936
575	1	STIP1_MOUSE	STIP1_MOUSE		20.4	543	62583	Stress-induced-phosphoprotein 1 OS=Mus musculus GN=Stip1 PE=1 SV=1	14	14	1	1	5	0	2	1	3	2	1	5	0	2	1	3	2	1	5	0	2	1	3	2	2.28571	2.85714	0	6.42857	2.42857	2.28571	0.868143	2.45055	FALSE	TRUE	3	3	TRUE	2.89286	1.86081	0.636565	0.160217
1300	1	PRELP_MOUSE	PRELP_MOUSE		10.3	378	43294	Prolargin OS=Mus musculus GN=Prelp PE=2 SV=2	10	10	1	3	2	2	0	1	1	1	3	2	2	0	1	1	1	3	2	2	0	1	1	1	6.54943	1.14286	1.42857	2.76514	3.53371	1	0.714286	2.44771	FALSE	TRUE	3	3	TRUE	2.9715	1.74933	0.764386	0.275802
499	1	NSUN2_MOUSE	NSUN2_MOUSE		10.7	757	85453	tRNA (cytosine-5-)-methyltransferase NSUN2 OS=Mus musculus GN=Nsun2 PE=1 SV=2	21	21	1	0	5	6	1	0	4	5	0	5	6	1	0	4	5	0	5	6	1	0	4	5	0.285714	2.85714	4.14286	3.803	0.285714	2.85714	2.85714	2.44124	FALSE	TRUE	3	2	TRUE	2.77218	2	0.47102	0.0146943
279	1	STT3A_MOUSE	STT3A_MOUSE		10.2	705	80599	Dolichyl-diphosphooligosaccharide--protein glycosyltransferase subunit STT3A OS=Mus musculus GN=Stt3a PE=1 SV=1	26	26	1	0	5	12	0	0	4	5	0	5	12	0	0	4	5	0	5	12	0	0	4	5	0	2.85714	8.42857	0	0	2.85714	2.85714	2.42857	FALSE	TRUE	2	2	TRUE	2.82143	1.90476	0.566815	0.039671
477	1	AQP1_MOUSE	AQP1_MOUSE		10.8	269	28794	Aquaporin-1 OS=Mus musculus GN=Aqp1 PE=1 SV=3	15	15	1	2	4	2	2	0	3	2	2	4	2	2	0	3	2	2	4	2	2	0	3	2	4.02429	2.28571	1.14286	6.28571	0.142857	2.23557	0.857143	2.42488	FALSE	TRUE	4	2	TRUE	3.43464	1.07852	1.6711	0.973773
261	1	RFC1_MOUSE	RFC1_MOUSE		5	1131	125986	Replication factor C subunit 1 OS=Mus musculus GN=Rfc1 PE=1 SV=2	13	13	1	1	2	3	5	0	1	1	1	2	3	5	0	1	1	1	2	3	5	0	1	1	2	0.771429	1.73586	11.5714	0	0.571429	0.285714	2.41941	FALSE	TRUE	4	2	TRUE	4.01968	0.285714	3.81444	2.82804
160	1	APOE_MOUSE	APOE_MOUSE		15.1	311	35868	Apolipoprotein E OS=Mus musculus GN=Apoe PE=1 SV=2	12	12	1	2	4	1	2	2	1	0	2	4	1	2	2	1	0	2	4	1	2	2	1	0	3.71429	2.23557	0.428571	5.85714	4.052	0.571429	0	2.40843	FALSE	TRUE	4	2	TRUE	3.05889	1.54114	0.989009	0.340938
901	1	INT9_MOUSE	INT9_MOUSE		14.4	658	74079	Integrator complex subunit 9 OS=Mus musculus GN=Ints9 PE=2 SV=1	21	21	1	0	5	4	0	0	5	7	0	5	4	0	0	5	7	0	5	4	0	0	5	7	0.857143	2.85714	2.85714	1.14286	0.857143	4.14286	4.14286	2.40816	FALSE	TRUE	2	2	TRUE	1.92857	3.04762	-0.66015	-1.08975
1307	1	BAG3_MOUSE	BAG3_MOUSE		11.4	577	61829	BAG family molecular chaperone regulator 3 OS=Mus musculus GN=Bag3 PE=1 SV=1	10	10	1	2	2	2	0	2	1	1	2	2	2	0	2	1	1	2	2	2	0	2	1	1	4.71429	1.14286	1.42857	2.85714	4.982	1	0.714286	2.40559	FALSE	TRUE	3	3	TRUE	2.53571	2.2321	0.183994	-0.491473
442	1	RPA2_MOUSE	RPA2_MOUSE		8.3	1135	127977	DNA-directed RNA polymerase I subunit RPA2 OS=Mus musculus GN=Polr1b PE=2 SV=1	22	22	1	0	5	5	1	0	3	8	0	5	5	1	0	3	8	0	5	5	1	0	3	8	0	2.85714	3.48057	3.724	0	2.17457	4.57143	2.4011	FALSE	TRUE	3	2	TRUE	2.51543	2.24867	0.161734	-0.421459
1264	1	MYCBP_MOUSE	MYCBP_MOUSE		30.1	103	11957	C-Myc-binding protein OS=Mus musculus GN=Mycbp PE=2 SV=4	10	10	1	2	0	5	0	2	0	1	2	0	5	0	2	0	1	2	0	5	0	2	0	1	4.59114	0	3.85714	2.41171	4.89514	0.285714	0.714286	2.39359	FALSE	TRUE	2	2	TRUE	2.715	1.96505	0.466388	-0.220957
1385	1	CP088_MOUSE	CP088_MOUSE		14	478	53847	Protein C16orf88 homolog OS=Mus musculus GN=Tsg118 PE=1 SV=2	10	10	1	0	1	1	1	1	3	3	0	1	1	1	1	3	3	0	1	1	1	1	3	3	1.579	0.571429	0.857143	5.43229	3.71429	2.43871	2.14286	2.39082	FALSE	TRUE	3	3	TRUE	2.10996	2.76529	-0.39021	-0.943716
547	1	GPKOW_MOUSE	GPKOW_MOUSE		12.7	488	53833	G patch domain and KOW motifs-containing protein OS=Mus musculus GN=Gpkow PE=2 SV=2	18	18	1	3	5	2	0	1	2	5	3	5	2	0	1	2	5	3	5	2	0	1	2	5	5.85714	2.85714	1.14286	0.428571	2.37143	1.19043	2.85714	2.38639	FALSE	TRUE	3	3	TRUE	2.57143	2.13967	0.265184	-0.325441
710	1	SYNE2_MOUSE	SYNE2_MOUSE		2	6874	782726	Nesprin-2 OS=Mus musculus GN=Syne2 PE=1 SV=2	18	12	0.667	3	6	3	0	1	1	4	3	5	2	0	1	0	1	3	6	3	0	1	0	2	5.98057	4.02429	2	0.857143	2.84614	0	0.933286	2.37735	FALSE	TRUE	3	3	TRUE	3.2155	1.25981	1.35184	0.657991
135	1	CTBP1_MOUSE	CTBP1_MOUSE		22	441	47746	C-terminal-binding protein 1 OS=Mus musculus GN=Ctbp1 PE=1 SV=2	21	19	0.905	1	3	7	1	0	4	5	1	3	7	1	0	4	3	1	3	7	1	0	4	4.2	1.78571	1.32143	4.77686	3.22857	0	2.85714	2.66886	2.37694	FALSE	TRUE	4	2	TRUE	2.77814	1.842	0.592848	0.0403593
496	1	ZN800_MOUSE	ZN800_MOUSE		20.4	662	74814	Zinc finger protein 800 OS=Mus musculus GN=Znf800 PE=1 SV=1	20	20	1	0	5	7	1	0	4	3	0	5	7	1	0	4	3	0	5	7	1	0	4	3	0.285714	2.85714	5.02386	3.76186	0.285714	2.85714	1.42857	2.35714	FALSE	TRUE	3	2	TRUE	2.98214	1.52381	0.968667	0.396392
498	1	CDK12_MOUSE	CDK12_MOUSE		4.7	1484	163682	Cell division protein kinase 12 OS=Mus musculus GN=Cdk12 PE=1 SV=2	37	6	0.162	1	5	11	1	4	9	6	1	0	1	0	2	2	0	1	0	5.75	0	3.333	3.633	0	2.28571	0	4.052	0.285714	7.19043	2.61429	0	2.34688	FALSE	FALSE	4	3	TRUE	1.65586	3.26824	-0.980935	-1.48362
319	1	ABCD3_MOUSE	ABCD3_MOUSE		7.7	659	75484	ATP-binding cassette sub-family D member 3 OS=Mus musculus GN=Abcd3 PE=1 SV=1	23	23	1	2	2	6	0	0	1	12	2	2	6	0	0	1	12	2	2	6	0	0	1	12	3.85714	0.857143	4.14286	0	0	0.642857	6.85714	2.33673	FALSE	TRUE	3	2	TRUE	2.21429	2.5	-0.175087	-0.589451
1071	1	PSMD6_MOUSE	PSMD6_MOUSE		10.5	389	45537	26S proteasome non-ATPase regulatory subunit 6 OS=Mus musculus GN=Psmd6 PE=2 SV=1	10	10	1	1	6	0	2	0	0	1	1	6	0	2	0	0	1	1	6	0	2	0	0	1	2.85714	4.14286	0	7.28571	1.14286	0.285714	0.571429	2.32653	FALSE	TRUE	3	1	TRUE	3.57143	0.666667	2.42146	2.12482
76	1	FAAH1_MOUSE	FAAH1_MOUSE		14.2	579	63222	Fatty-acid amide hydrolase 1 OS=Mus musculus GN=Faah PE=2 SV=1	19	19	1	2	3	6	0	2	2	4	2	3	6	0	2	2	4	2	3	6	0	2	2	4	3.53371	1.28571	4.14286	0	3.88886	1.14286	2.28571	2.32567	FALSE	TRUE	3	3	TRUE	2.24057	2.43914	-0.122508	-0.512919
157	1	HS90A_MOUSE	HS90A_MOUSE		18.3	733	84789	Heat shock protein HSP 90-alpha OS=Mus musculus GN=Hsp90aa1 PE=1 SV=4	49	8	0.163	6	12	7	8	4	6	6	1	2	2	0	0	0	3	3.5	7	4	0	0	0	4.8	6.68943	4.28571	2.47271	0	0	0	2.8	2.32112	FALSE	FALSE	4	3	TRUE	3.36196	0.933333	1.84884	1.21322
1298	1	REFP2_MOUSE	REFP2_MOUSE		38.1	218	23731	RNA and export factor-binding protein 2 OS=Mus musculus GN=Refbp2 PE=1 SV=1	290	10	0.034	40	31	33	69	47	31	39	0	2	2	0	0	2	4	0	3.381	3.24	0	0	3.611	6.188	1.42857	1.91157	2.32	2.62929	1.42857	2.60971	3.884	2.31596	FALSE	FALSE	4	3	TRUE	2.07236	2.64076	-0.349682	-0.737366
348	1	RPB9_MOUSE	RPB9_MOUSE		15.2	125	14524	DNA-directed RNA polymerase II subunit RPB9 OS=Mus musculus GN=Polr2i PE=2 SV=1	24	24	1	0	6	8	0	0	5	5	0	6	8	0	0	5	5	0	6	8	0	0	5	5	0	3.71429	5.85714	0	0	3.75157	2.85714	2.31145	FALSE	TRUE	2	2	TRUE	2.39286	2.2029	0.119327	-0.338592
219	1	XRCC6_MOUSE	XRCC6_MOUSE		10.9	608	69485	X-ray repair cross-complementing protein 6 OS=Mus musculus GN=Xrcc6 PE=2 SV=5	16	16	1	2	2	3	1	1	4	3	2	2	3	1	1	4	3	2	2	3	1	1	4	3	3.724	0.747286	1.72929	3.29914	2.28571	2.85714	1.42857	2.29588	FALSE	TRUE	4	3	TRUE	2.37493	2.19048	0.11664	-0.371346
931	1	CC137_MOUSE	CC137_MOUSE		15.2	290	32919	Coiled-coil domain-containing protein 137 OS=Mus musculus GN=Ccdc137 PE=2 SV=1	13	13	1	0	3	0	1	2	4	3	0	3	0	1	2	4	3	0	3	0	1	2	4	3	0.857143	1.42857	0	4.57143	4.57143	2.85714	1.72929	2.28786	FALSE	TRUE	2	3	TRUE	1.71429	3.05262	-0.83244	-1.1349
139	1	PIAS1_MOUSE	PIAS1_MOUSE		7.2	651	71619	E3 SUMO-protein ligase PIAS1 OS=Mus musculus GN=Pias1 PE=1 SV=2	11	11	1	2	4	0	2	2	0	1	2	4	0	2	2	0	1	2	4	0	2	2	0	1	3.66171	2.18186	0	5.85714	4.02429	0	0.285714	2.28724	FALSE	TRUE	3	2	TRUE	2.92518	1.43667	1.0258	0.574792
396	1	CYC_MOUSE	CYC_MOUSE		48.6	105	11606	Cytochrome c, somatic OS=Mus musculus GN=Cycs PE=1 SV=2	20	20	1	0	6	9	1	0	1	3	0	6	9	1	0	1	3	0	6	9	1	0	1	3	0	3.73214	6.42857	3.66171	0	0.657143	1.42857	2.27259	FALSE	TRUE	3	2	TRUE	3.45561	0.695238	2.31336	1.71888
626	1	NDUA4_MOUSE	NDUA4_MOUSE		26.8	82	9328	NADH dehydrogenase [ubiquinone] 1 alpha subcomplex subunit 4 OS=Mus musculus GN=Ndufa4 PE=1 SV=2	18	18	1	1	6	3	0	1	3	4	1	6	3	0	1	3	4	1	6	3	0	1	3	4	2.28571	3.884	1.97957	0.571429	2.57143	2.28571	2.28571	2.26622	FALSE	TRUE	3	3	TRUE	2.18018	2.38095	-0.127092	-0.381982
1199	1	PHF14_MOUSE	PHF14_MOUSE		8.4	881	99106	PHD finger protein 14 OS=Mus musculus GN=Phf14 PE=1 SV=1	15	15	1	0	2	4	0	1	0	8	0	2	4	0	1	0	8	0	2	4	0	1	0	8	1.28571	1.14286	2.85714	2.28571	3.28571	0.285714	4.71071	2.2648	FALSE	TRUE	2	2	TRUE	1.89286	2.76071	-0.544476	-0.741398
1179	1	LMAN1_MOUSE	LMAN1_MOUSE		12.2	517	57790	Protein ERGIC-53 OS=Mus musculus GN=Lman1 PE=2 SV=1	14	14	1	1	3	2	0	1	2	5	1	3	2	0	1	2	5	1	3	2	0	1	2	5	2.85714	1.57143	1.42857	2.28571	3.28571	1.42857	2.85714	2.2449	FALSE	TRUE	3	3	TRUE	2.03571	2.52381	-0.310068	-0.431868
222	1	CATA_MOUSE	CATA_MOUSE		9.9	527	59766	Catalase OS=Mus musculus GN=Cat PE=1 SV=3	22	22	1	0	18	1	0	0	2	1	0	18	1	0	0	2	1	0	18	1	0	0	2	1	0	13.8129	0.428571	0	0	1.14286	0.285714	2.23857	FALSE	TRUE	2	2	TRUE	3.56036	0.47619	2.90241	2.28417
1317	1	TBL1X_MOUSE	TBL1X_MOUSE		26.2	527	56803	F-box-like/WD repeat-containing protein TBL1X OS=Mus musculus GN=Tbl1x PE=2 SV=2	34	13	0.382	4	6	4	4	3	6	7	0	3	3	0	0	3	4	0	3.75	3.375	0	0	3.643	4.923	1.42857	1.96429	2.33929	2.85714	1.57143	2.61571	2.84614	2.2318	FALSE	TRUE	4	3	TRUE	2.14732	2.34443	-0.126698	-0.293156
914	1	ZN828_MOUSE	ZN828_MOUSE		12.2	802	87562	Zinc finger protein 828 OS=Mus musculus GN=Znf828 PE=1 SV=1	10	10	1	3	0	2	0	2	2	1	3	0	2	0	2	2	1	3	0	2	0	2	2	1	6.27571	0	1.35614	1.19643	4.57143	1.42857	0.571429	2.19996	FALSE	TRUE	2	3	TRUE	2.20707	2.19048	0.0108888	-0.185145
1295	1	NO66_MOUSE	NO66_MOUSE		10.4	603	67558	Lysine-specific demethylase NO66 OS=Mus musculus GN=No66 PE=1 SV=2	14	14	1	0	5	5	0	0	2	2	0	5	5	0	0	2	2	0	5	5	0	0	2	2	1.42857	3.28571	3.85714	2.60971	1.42857	1.57143	1.19043	2.19594	FALSE	TRUE	2	2	TRUE	2.79529	1.39681	1.00086	0.733303
661	1	K2C1B_MOUSE	K2C1B_MOUSE		11.4	572	61360	Keratin, type II cytoskeletal 1b OS=Mus musculus GN=Krt77 PE=1 SV=1	100	4	0.04	11	12	14	9	29	14	11	0	1	0	1	2	0	0	0	2.051	0	1.541	4.12	0	0	0.428571	1.15014	0	5.64871	8.11257	0	0	2.19143	FALSE	FALSE	4	3	TRUE	1.80686	2.70419	-0.581714	-0.721118
972	1	PHIP_MOUSE	PHIP_MOUSE		4.7	1821	206727	PH-interacting protein OS=Mus musculus GN=Phip PE=1 SV=2	10	10	1	2	0	0	0	3	1	4	2	0	0	0	3	1	4	2	0	0	0	3	1	4	4.28571	0	0	1.42857	6.33329	0.857143	2.42857	2.19047	FALSE	TRUE	1	3	TRUE	1.42857	3.20633	-1.16635	-1.33383
758	1	R12BA_MOUSE	R12BA_MOUSE		6.1	836	96597	RNA-binding protein 12B-A OS=Mus musculus GN=Rbm12ba PE=1 SV=2	17	10	0.588	0	4	3	1	0	3	6	0	2	3	1	0	1	3	0	4	3	1	0	3	5.25	0.595286	2.28571	2.17143	4.14286	0.714286	2.28571	3.11729	2.18751	FALSE	TRUE	3	2	TRUE	2.29882	2.0391	0.172965	-0.0889953
1235	1	LMAN2_MOUSE	LMAN2_MOUSE		8.9	358	40417	Vesicular integral-membrane protein VIP36 OS=Mus musculus GN=Lman2 PE=2 SV=1	15	15	1	0	2	2	0	0	6	5	0	2	2	0	0	6	5	0	2	2	0	0	6	5	1.35714	1.14286	1.42857	2.31629	1.42857	4.77686	2.85714	2.18678	FALSE	TRUE	2	2	TRUE	1.56121	3.02086	-0.952289	-1.02663
974	1	PSMD2_MOUSE	PSMD2_MOUSE		3.1	908	100204	26S proteasome non-ATPase regulatory subunit 2 OS=Mus musculus GN=Psmd2 PE=1 SV=1	15	15	1	0	7	2	0	1	5	0	0	7	2	0	1	5	0	0	7	2	0	1	5	0	0.892286	4.57143	1.36514	1.42857	2.85714	4.14286	0	2.17963	FALSE	TRUE	2	2	TRUE	2.06436	2.33333	-0.1767	-0.319796
1093	1	NOG2_MOUSE	NOG2_MOUSE		12.4	728	83331	Nucleolar GTP-binding protein 2 OS=Mus musculus GN=Gnl2 PE=2 SV=1	16	16	1	0	2	3	0	1	2	8	0	2	3	0	1	2	8	0	2	3	0	1	2	8	1.14286	1.12857	2.28571	1.77686	2.85714	1.42857	4.602	2.17453	FALSE	TRUE	2	3	TRUE	1.5835	2.96257	-0.903733	-1.07514
1355	1	RFC2_MOUSE	RFC2_MOUSE		14	349	38726	Replication factor C subunit 2 OS=Mus musculus GN=Rfc2 PE=2 SV=1	5	5	1	3	1	0	1	0	0	0	3	1	0	1	0	0	0	3	1	0	1	0	0	0	6.57143	0.571429	0.285714	5.42857	1.91071	0.428571	0	2.17092	FALSE	TRUE	3	0	TRUE	3.21429	0.779762	2.04339	1.73778
921	1	NSUN5_MOUSE	NSUN5_MOUSE		21.3	465	51031	Putative methyltransferase NSUN5 OS=Mus musculus GN=Nsun5 PE=2 SV=2	13	13	1	3	0	3	0	0	1	6	3	0	3	0	0	1	6	3	0	3	0	0	1	6	6.28571	0	2.28571	1.28571	0.857143	0.857143	3.60957	2.16871	FALSE	TRUE	2	2	TRUE	2.46429	1.77462	0.47366	0.399004
668	1	DNJC8_MOUSE	DNJC8_MOUSE		23.3	253	29814	DnaJ homolog subfamily C member 8 OS=Mus musculus GN=Dnajc8 PE=2 SV=2	12	12	1	1	1	3	1	2	1	3	1	1	3	1	2	1	3	1	1	3	1	2	1	3	2.28571	0.285714	2	4.14286	4.25	0.760429	1.42857	2.16476	FALSE	TRUE	4	3	TRUE	2.17857	2.14633	0.0215083	-0.0958032
151	1	K2C1_MOUSE	K2C1_MOUSE		6.3	637	65607	Keratin, type II cytoskeletal 1 OS=Mus musculus GN=Krt1 PE=1 SV=4	101	5	0.05	13	8	16	9	35	12	8	0	0	2	1	1	1	0	0	0	3.571	1.541	2.799	2.105	0	0	0	2.36729	5.64871	5.39986	1.72929	0	2.16359	FALSE	FALSE	4	3	TRUE	2.004	2.37638	-0.245884	-0.345027
1075	1	ECHB_MOUSE	ECHB_MOUSE		5.7	475	51387	Trifunctional enzyme subunit beta, mitochondrial OS=Mus musculus GN=Hadhb PE=1 SV=1	14	14	1	0	5	1	1	0	2	5	0	5	1	1	0	2	5	0	5	1	1	0	2	5	1.14286	3	0.857143	4.71071	1.14286	1.42857	2.85714	2.16276	FALSE	TRUE	3	2	TRUE	2.42768	1.80952	0.423967	0.503445
1371	1	EHMT2_MOUSE	EHMT2_MOUSE		6.7	1263	138040	Histone-lysine N-methyltransferase, H3 lysine-9 specific 3 OS=Mus musculus GN=Ehmt2 PE=1 SV=2	10	10	1	1	3	6	0	0	0	0	1	3	6	0	0	0	0	1	3	6	0	0	0	0	3.28571	1.85714	4.57143	2.85714	1.97957	0.428571	0.142857	2.16035	FALSE	TRUE	3	0	TRUE	3.14286	0.850333	1.88598	2.07335
652	1	CLH_MOUSE	CLH_MOUSE		7.4	1675	191558	Clathrin heavy chain 1 OS=Mus musculus GN=Cltc PE=1 SV=3	20	20	1	0	4	6	0	0	6	4	0	4	6	0	0	6	4	0	4	6	0	0	6	4	0.428571	2.28571	4.26529	0.666714	0.571429	4.57143	2.28571	2.15355	FALSE	TRUE	2	2	TRUE	1.91157	2.47619	-0.373363	-0.456588
946	1	GLE1_MOUSE	GLE1_MOUSE		9.7	699	79575	Nucleoporin GLE1 OS=Mus musculus GN=Gle1 PE=2 SV=2	12	12	1	1	0	3	0	2	4	2	1	0	3	0	2	4	2	1	0	3	0	2	4	2	2.85714	0	2.28571	1.35714	4.57143	2.85714	1.12857	2.15102	FALSE	TRUE	2	3	TRUE	1.625	2.85238	-0.811727	-0.704991
1236	1	GPTC1_MOUSE	GPTC1_MOUSE		14	930	103009	G patch domain-containing protein 1 OS=Mus musculus GN=Gpatch1 PE=2 SV=1	10	10	1	2	3	2	0	1	1	1	2	3	2	0	1	1	1	2	3	2	0	1	1	1	4.58929	1.73586	1.42857	2.32	3.28571	0.933286	0.714286	2.14386	FALSE	TRUE	3	3	TRUE	2.51843	1.64443	0.614937	0.58821
622	1	TAF6_MOUSE	TAF6_MOUSE		23.3	678	72674	Transcription initiation factor TFIID subunit 6 OS=Mus musculus GN=Taf6 PE=2 SV=1	18	18	1	2	7	2	0	0	2	5	2	7	2	0	0	2	5	2	7	2	0	0	2	5	4.14286	4.57143	1.14286	0.571429	0.428571	1.28571	2.85714	2.14286	FALSE	TRUE	3	2	TRUE	2.60714	1.52381	0.774787	0.757806
629	1	VPS72_MOUSE	VPS72_MOUSE		14.4	368	40785	Vacuolar protein sorting-associated protein 72 homolog OS=Mus musculus GN=Vps72 PE=2 SV=2	21	21	1	0	4	6	0	0	4	7	0	4	6	0	0	4	7	0	4	6	0	0	4	7	0.428571	2.28571	4.25	0.571429	0.428571	2.85714	4.14286	2.13776	FALSE	TRUE	2	2	TRUE	1.88393	2.47619	-0.394378	-0.327888
899	1	ESRP2_MOUSE	ESRP2_MOUSE		8.8	717	77362	Epithelial splicing regulatory protein 2 OS=Mus musculus GN=Esrp2 PE=2 SV=1	13	13	1	1	5	1	1	0	3	2	1	5	1	1	0	3	2	1	5	1	1	0	3	2	2.62929	2.85714	0.714286	4.57143	0.857143	2.28571	1.03571	2.13582	FALSE	TRUE	4	2	TRUE	2.69304	1.39286	0.951186	1.15505
740	1	FA98B_MOUSE	FA98B_MOUSE		16.8	429	45350	Protein FAM98B OS=Mus musculus GN=Fam98b PE=2 SV=1	11	11	1	2	0	3	0	3	2	1	2	0	3	0	3	2	1	2	0	3	0	3	2	1	4.14286	0	2.14286	0.857143	6	1.36514	0.428571	2.1338	FALSE	TRUE	2	3	TRUE	1.78571	2.5979	-0.540847	-0.340862
1262	1	3BHS7_MOUSE	3BHS7_MOUSE		12.5	369	41136	3 beta-hydroxysteroid dehydrogenase type 7 OS=Mus musculus GN=Hsd3b7 PE=2 SV=1	14	14	1	0	3	1	0	0	4	6	0	3	1	0	0	4	6	0	3	1	0	0	4	6	1.42857	1.76186	0.857143	2.37143	1.42857	3.322	3.75	2.13137	FALSE	TRUE	2	2	TRUE	1.60475	2.83352	-0.820249	-0.646245
654	1	CDK13_MOUSE	CDK13_MOUSE		4.7	1511	164610	Cell division protein kinase 13 OS=Mus musculus GN=Cdk13 PE=1 SV=2	40	9	0.225	0	8	10	1	2	10	9	0	3	0	0	0	3	3	0	6.8	0	0	0	5.45	7.8	0.428571	4.25714	0	0.714286	0.571429	4.42443	4.47143	2.1239	FALSE	FALSE	3	3	TRUE	1.35	3.15576	-1.22503	-0.891285
558	1	TSR1_MOUSE	TSR1_MOUSE		5.1	803	92106	Pre-rRNA-processing protein TSR1 homolog OS=Mus musculus GN=Tsr1 PE=2 SV=1	21	21	1	0	7	1	0	0	6	7	0	7	1	0	0	6	7	0	7	1	0	0	6	7	0.285714	4.57143	0.571429	0.428571	0.285714	4.57143	4.14286	2.12245	FALSE	TRUE	2	2	TRUE	1.46429	3	-1.03477	-0.731989
1260	1	DHB11_MOUSE	DHB11_MOUSE		16.8	298	32882	Estradiol 17-beta-dehydrogenase 11 OS=Mus musculus GN=Hsd17b11 PE=2 SV=1	30	10	0.333	0	8	6	1	0	7	8	0	4	3	1	0	0	2	0	4.8	3.36	1	0	0	2.706	1.42857	2.66886	2.33714	5.3	1.42857	0.285714	1.38657	2.11935	FALSE	TRUE	3	2	TRUE	2.93364	1.03362	1.50499	1.67695
214	1	TGM2_MOUSE	TGM2_MOUSE		15	686	77062	Protein-glutamine gamma-glutamyltransferase 2 OS=Mus musculus GN=Tgm2 PE=1 SV=4	16	16	1	1	3	0	0	3	6	3	1	3	0	0	3	6	3	1	3	0	0	3	6	3	1.91043	1.35714	0	0	5.42857	4.57143	1.42857	2.09945	FALSE	TRUE	2	3	TRUE	0.816893	3.80952	-2.22139	-1.78754
1152	1	NIP7_MOUSE	NIP7_MOUSE		16.7	180	20453	60S ribosome subunit biogenesis protein NIP7 homolog OS=Mus musculus GN=Nip7 PE=2 SV=1	13	13	1	0	5	2	0	1	3	2	0	5	2	0	1	3	2	0	5	2	0	1	3	2	1.14286	3.19043	1.42857	2.17143	3.21771	2.36729	1.14286	2.09445	FALSE	TRUE	2	3	TRUE	1.98332	2.24262	-0.177266	0.0424456
245	1	PABP1_MOUSE	PABP1_MOUSE		8.8	636	70644	Polyadenylate-binding protein 1 OS=Mus musculus GN=Pabpc1 PE=1 SV=1	15	15	1	0	5	0	1	2	3	4	0	5	0	1	2	3	4	0	5	0	1	2	3	4	0	2.85714	0	3.322	4.14286	1.96643	2.28571	2.08202	FALSE	TRUE	2	3	TRUE	1.54479	2.79833	-0.857161	-0.576429
371	1	RS11_MOUSE	RS11_MOUSE		31.6	158	18432	40S ribosomal protein S11 OS=Mus musculus GN=Rps11 PE=2 SV=3	23	23	1	0	5	5	0	0	5	8	0	5	5	0	0	5	8	0	5	5	0	0	5	8	0	2.85714	3.29243	0	0	3.76186	4.57143	2.06898	FALSE	TRUE	2	2	TRUE	1.53739	2.77776	-0.853437	-0.524544
863	1	ATAD2_MOUSE	ATAD2_MOUSE		5.8	1040	117944	ATPase family AAA domain-containing protein 2 OS=Mus musculus GN=Atad2 PE=1 SV=1	11	11	1	1	1	2	0	3	3	1	1	1	2	0	3	3	1	1	1	2	0	3	3	1	2.57143	0.428571	1.28571	1.14286	6.14286	2.28571	0.571429	2.06122	FALSE	TRUE	3	3	TRUE	1.35714	3	-1.14439	-0.732057
1367	1	IF2G_MOUSE	IF2G_MOUSE		11.7	472	51066	Eukaryotic translation initiation factor 2 subunit 3, X-linked OS=Mus musculus GN=Eif2s3x PE=1 SV=2	10	10	1	1	2	2	0	0	3	2	1	2	2	0	0	3	2	1	2	2	0	0	3	2	3.28571	1.14286	1.42857	2.85714	1.96643	2.43257	1.28571	2.057	FALSE	TRUE	3	2	TRUE	2.17857	1.8949	0.201257	0.509745
785	1	CGBP1_MOUSE	CGBP1_MOUSE		32.3	167	18762	CGG triplet repeat-binding protein 1 OS=Mus musculus GN=Cggbp1 PE=2 SV=1	10	10	1	1	2	3	2	0	2	0	1	2	3	2	0	2	0	1	2	3	2	0	2	0	2.39629	0.892286	2.19043	6.75929	0.724857	1.42857	0	2.05596	FALSE	TRUE	4	1	TRUE	3.05957	0.71781	2.09166	2.24167
725	1	RPF1_MOUSE	RPF1_MOUSE		16.6	349	40038	Ribosome production factor 1 OS=Mus musculus GN=Rpf1 PE=2 SV=2	14	14	1	1	0	1	0	2	1	9	1	0	1	0	2	1	9	1	0	1	0	2	1	9	2.347	0	0.642857	0.857143	4.28571	0.821429	5.37143	2.04651	FALSE	TRUE	2	3	TRUE	0.96175	3.49286	-1.86067	-1.45042
1160	1	PAIRB_MOUSE	PAIRB_MOUSE		12.3	407	44715	Plasminogen activator inhibitor 1 RNA-binding protein OS=Mus musculus GN=Serbp1 PE=1 SV=2	6	6	1	2	0	0	1	1	1	1	2	0	0	1	1	1	1	2	0	0	1	1	1	1	4.57143	0	0.142857	4.78414	3.22857	0.877571	0.642857	2.03535	FALSE	TRUE	2	3	TRUE	2.37461	1.583	0.585028	0.742409
807	1	CN021_MOUSE	CN021_MOUSE		10.8	636	70047	Pumilio domain-containing protein C14orf21 homolog OS=Mus musculus PE=2 SV=1	18	18	1	0	0	6	0	0	4	8	0	0	6	0	0	4	8	0	0	6	0	0	4	8	0.714286	0	4.30257	1	0.761857	2.85714	4.57143	2.02961	FALSE	TRUE	1	2	TRUE	1.50421	2.73014	-0.859966	-0.67658
1356	1	UCHL5_MOUSE	UCHL5_MOUSE		13.7	329	37618	Ubiquitin carboxyl-terminal hydrolase isozyme L5 OS=Mus musculus GN=Uchl5 PE=2 SV=2	11	11	1	0	2	4	0	0	2	3	0	2	4	0	0	2	3	0	2	4	0	0	2	3	1.57143	1.14286	3.00486	2.85714	1.91157	1.57143	2.14286	2.02888	FALSE	TRUE	2	2	TRUE	2.14407	1.87529	0.193243	0.454313
1309	1	PIAS4_MOUSE	PIAS4_MOUSE		12.8	507	55571	E3 SUMO-protein ligase PIAS4 OS=Mus musculus GN=Pias4 PE=1 SV=2	7	7	1	2	1	1	0	1	2	0	2	1	1	0	1	2	0	2	1	1	0	1	2	0	4.71429	0.571429	0.857143	2.85714	3.615	1.57143	0	2.02663	FALSE	TRUE	3	2	TRUE	2.25	1.72881	0.380146	0.600803
1302	1	HYOU1_MOUSE	HYOU1_MOUSE		6.1	999	111182	Hypoxia up-regulated protein 1 OS=Mus musculus GN=Hyou1 PE=1 SV=1	7	7	1	2	1	1	0	1	0	2	2	1	1	0	1	0	2	2	1	1	0	1	0	2	4.71429	0.571429	0.857143	2.84614	3.556	0.428571	1.19043	2.02343	FALSE	TRUE	3	2	TRUE	2.24725	1.725	0.381564	0.613038
244	1	GRN_MOUSE	GRN_MOUSE		10.4	589	63459	Granulins OS=Mus musculus GN=Grn PE=1 SV=2	18	18	1	1	3	5	0	1	4	4	1	3	5	0	1	4	4	1	3	5	0	1	4	4	1.96643	1.381	3.28571	0	2.28571	2.85714	2.28571	2.00882	FALSE	TRUE	3	3	TRUE	1.65829	2.47619	-0.57843	-0.467709
469	1	GABPA_MOUSE	GABPA_MOUSE		20.3	454	51364	GA-binding protein alpha chain OS=Mus musculus GN=Gabpa PE=1 SV=1	22	22	1	0	6	1	0	0	3	12	0	6	1	0	0	3	12	0	6	1	0	0	3	12	0	3.75157	0.571429	0.285714	0	2.18186	7.24486	2.00506	FALSE	TRUE	2	2	TRUE	1.15218	3.14224	-1.44743	-1.11681
54	1	RSRC2_MOUSE	RSRC2_MOUSE		11.7	376	43877	Arginine/serine-rich coiled-coil protein 2 OS=Mus musculus GN=Rsrc2 PE=2 SV=1	14	14	1	3	2	2	1	0	5	1	3	2	2	1	0	5	1	3	2	2	1	0	5	1	5.294	0.714286	1	3	0	3.71429	0.285714	2.00118	FALSE	TRUE	4	2	TRUE	2.50207	1.33333	0.908085	0.50337
878	1	PHC3_MOUSE	PHC3_MOUSE		7.4	981	105440	Polyhomeotic-like protein 3 OS=Mus musculus GN=Phc3 PE=1 SV=1	18	11	0.611	0	5	5	0	1	2	5	0	3	3	0	1	1	3	0	4.5	4	0	1	2	3.75	0.857143	2.565	2.85714	1.14286	2.85714	1.42857	2.25	1.99398	FALSE	TRUE	2	3	TRUE	1.85554	2.17857	-0.231547	-0.28667
917	1	PLCB_MOUSE	PLCB_MOUSE		31.3	278	31012	1-acyl-sn-glycerol-3-phosphate acyltransferase beta OS=Mus musculus GN=Agpat2 PE=1 SV=1	11	11	1	2	1	3	0	1	3	1	2	1	3	0	1	3	1	2	1	3	0	1	3	1	4.28571	0.428571	2.28571	1.22443	2.85714	2.28571	0.571429	1.99124	FALSE	TRUE	3	3	TRUE	2.05611	1.90476	0.110305	0.0212441
560	1	SFR19_MOUSE	SFR19_MOUSE		3.7	1256	133843	Splicing factor, arginine/serine-rich 19 OS=Mus musculus GN=Scaf1 PE=1 SV=1	15	15	1	3	2	3	0	0	3	4	3	2	3	0	0	3	4	3	2	3	0	0	3	4	5.85714	0.857143	1.91071	0.428571	0.285714	2.28571	2.28571	1.98724	FALSE	TRUE	3	2	TRUE	2.26339	1.61905	0.483342	0.291898
1151	1	BCL7A_MOUSE	BCL7A_MOUSE		17.6	210	22782	B-cell CLL/lymphoma 7 protein family member A OS=Mus musculus GN=Bcl7a PE=2 SV=1	30	4	0.133	1	5	6	0	2	8	8	1	1	1	0	0	1	0	1	3	3.5	0	0	4.5	0	2.85714	1.57143	2.35714	2.16886	1.28571	3.64286	0	1.98331	FALSE	FALSE	3	3	TRUE	2.23864	1.64286	0.446417	0.261344
136	1	RPP30_MOUSE	RPP30_MOUSE		31.3	268	29474	Ribonuclease P protein subunit p30 OS=Mus musculus GN=Rpp30 PE=2 SV=1	19	19	1	1	5	1	0	1	3	8	1	5	1	0	1	3	8	1	5	1	0	1	3	8	1.85714	2.8	0.428571	0	2.28571	1.87243	4.57143	1.97361	FALSE	TRUE	3	3	TRUE	1.27143	2.90986	-1.1945	-0.989047
1164	1	CJ058_MOUSE	CJ058_MOUSE		14.7	218	24396	Uncharacterized protein C10orf58 homolog OS=Mus musculus PE=1 SV=2	9	9	1	2	1	0	0	0	5	1	2	1	0	0	0	5	1	2	1	0	0	0	5	1	4.57143	0.571429	0.285714	2.18186	1.28571	4.26529	0.642857	1.97204	FALSE	TRUE	2	2	TRUE	1.90261	2.06462	-0.117898	-0.250566
834	1	POGZ_MOUSE	POGZ_MOUSE		7.2	1409	154911	Pogo transposable element with ZNF domain OS=Mus musculus GN=Pogz PE=1 SV=2	10	10	1	2	2	1	0	2	3	0	2	2	1	0	2	3	0	2	2	1	0	2	3	0	4.20886	0.933429	0.714286	1.07143	4.57143	2.28571	0	1.96931	FALSE	TRUE	3	2	TRUE	1.732	2.28571	-0.400206	-0.463299
221	1	CRYAB_MOUSE	CRYAB_MOUSE		35.4	175	20070	Alpha-crystallin B chain OS=Mus musculus GN=Cryab PE=1 SV=2	7	7	1	0	0	0	6	0	0	1	0	0	0	6	0	0	1	0	0	0	6	0	0	1	0	0	0	13.4486	0	0	0.285714	1.96204	FALSE	TRUE	1	1	FALSE	3.36214	0.0952381	5.1417	3.2989
886	1	NUPL2_MOUSE	NUPL2_MOUSE		13.3	420	44338	Nucleoporin-like protein 2 OS=Mus musculus GN=Nupl2 PE=2 SV=1	13	13	1	0	5	1	1	0	3	3	0	5	1	1	0	3	3	0	5	1	1	0	3	3	0.857143	2.85714	0.714286	4.57143	0.857143	2.28571	1.57143	1.95918	FALSE	TRUE	3	2	TRUE	2.25	1.57143	0.517848	0.120725
969	1	ES31L_MOUSE	ES31L_MOUSE		12.9	568	63008	Liver carboxylesterase 31-like OS=Mus musculus PE=2 SV=1	88	3	0.034	2	8	25	2	14	21	16	1	0	0	0	1	1	0	2	0	0	0	2.857	3.5	0	4.28571	0	0	1.42857	5.40814	2.57143	0	1.95627	FALSE	FALSE	4	3	TRUE	1.42857	2.65986	-0.896776	-0.974401
1113	1	ZMAT2_MOUSE	ZMAT2_MOUSE		13.6	199	23613	Zinc finger matrin-type protein 2 OS=Mus musculus GN=Zmat2 PE=2 SV=1	12	12	1	1	2	3	0	0	4	2	1	2	3	0	0	4	2	1	2	3	0	0	4	2	2.85714	1.14286	2.28571	1.881	1.14286	3.22857	1.14286	1.95443	FALSE	TRUE	3	2	TRUE	2.04168	1.8381	0.151544	-0.19465
1312	1	PHC2_MOUSE	PHC2_MOUSE		6.2	850	89800	Polyhomeotic-like protein 2 OS=Mus musculus GN=Phc2 PE=1 SV=1	16	9	0.563	0	3	5	0	0	1	7	0	1	3	0	0	0	5	0	1.5	4	0	0	0	6.25	1.42857	0.642857	2.85714	2.85714	1.53571	0.428571	3.90443	1.95063	FALSE	TRUE	2	2	TRUE	1.94643	1.95624	-0.00725257	-0.30804
774	1	C19L2_MOUSE	C19L2_MOUSE		8.6	887	103174	CWF19-like protein 2 OS=Mus musculus GN=Cwf19l2 PE=2 SV=1	15	15	1	0	4	0	0	2	2	7	0	4	0	0	2	2	7	0	4	0	0	2	2	7	0.642857	2.28571	0	0.859143	4.30257	1.4	4.14286	1.94759	FALSE	TRUE	1	3	TRUE	0.946929	3.28181	-1.79316	-1.51614
494	1	CHD8_MOUSE	CHD8_MOUSE		7.5	2582	290848	Chromodomain-helicase-DNA-binding protein 8 OS=Mus musculus GN=Chd8 PE=1 SV=1	33	12	0.364	2	11	8	2	0	2	8	0	3	4	0	0	0	5	0	6.571	6.138	0	0	0	6.614	0.142857	4.22443	4.59114	0.285714	0.285714	0	4.052	1.94027	FALSE	TRUE	4	2	TRUE	2.31104	1.4459	0.676567	0.1672
1322	1	VAPB_MOUSE	VAPB_MOUSE		11.1	243	26947	Vesicle-associated membrane protein-associated protein B OS=Mus musculus GN=Vapb PE=2 SV=3	11	11	1	0	3	3	0	0	3	2	0	3	3	0	0	3	2	0	3	3	0	0	3	2	1.42857	1.78571	2.28571	2.85714	1.57143	2.42857	1.22443	1.94022	FALSE	TRUE	2	2	TRUE	2.08929	1.74148	0.262699	-0.110311
1299	1	TBA8_MOUSE	TBA8_MOUSE		20.3	449	50053	Tubulin alpha-8 chain OS=Mus musculus GN=Tuba8 PE=1 SV=1	35	1	0.029	0	10	2	3	0	10	10	0	1	0	0	0	0	0	0	10	0	0	0	0	0	1.42857	7.31614	0.285714	2.66886	1.42857	0.428571	0	1.93663	FALSE	FALSE	3	2	TRUE	2.92482	0.619048	2.24023	1.16661
1108	1	IN80B_MOUSE	IN80B_MOUSE		14.7	375	40566	INO80 complex subunit B OS=Mus musculus GN=Ino80b PE=1 SV=2	7	7	1	3	2	0	0	1	1	0	3	2	0	0	1	1	0	3	2	0	0	1	1	0	6.42857	1.14286	0.142857	1.85714	3.00486	0.857143	0	1.91906	FALSE	TRUE	2	2	TRUE	2.39286	1.28733	0.894349	0.198496
879	1	CMLO2_MOUSE	CMLO2_MOUSE		23.5	238	26425	Probable N-acetyltransferase CML2 OS=Mus musculus GN=Cml2 PE=2 SV=1	12	12	1	0	2	6	1	0	1	2	0	2	6	1	0	1	2	0	2	6	1	0	1	2	0.857143	1	4.33043	4.47143	0.857143	0.857143	1	1.91047	FALSE	TRUE	3	2	TRUE	2.66475	0.904762	1.55839	0.628345
123	1	SP3_MOUSE	SP3_MOUSE		4.7	783	82363	Transcription factor Sp3 OS=Mus musculus GN=Sp3 PE=1 SV=2	16	13	0.813	2	3	4	0	1	4	2	2	3	2	0	1	4	1	2	3	4	0	1	4	2	3.64286	1.29243	2.43871	0	2.23586	2.85714	0.857143	1.90345	FALSE	TRUE	3	3	TRUE	1.8435	1.98338	-0.105514	-0.490185
1125	1	DENR_MOUSE	DENR_MOUSE		12.6	198	22167	Density-regulated protein OS=Mus musculus GN=Denr PE=2 SV=1	5	5	1	0	0	2	3	0	0	0	0	0	2	3	0	0	0	0	0	2	3	0	0	0	1.14286	0	1.42857	9.28571	1.17	0.285714	0	1.90184	FALSE	TRUE	2	0	FALSE	2.96429	0.485238	2.61092	1.61352
806	1	TM214_MOUSE	TM214_MOUSE		13.7	687	76431	Transmembrane protein 214 OS=Mus musculus GN=Tmem214 PE=2 SV=1	14	14	1	0	3	3	0	1	5	2	0	3	3	0	1	5	2	0	3	3	0	1	5	2	0.714286	1.42857	2.21429	0.933429	2.85714	4.14286	1	1.89865	FALSE	TRUE	2	3	TRUE	1.32264	2.66667	-1.01161	-1.32349
401	1	YBOX1_MOUSE	YBOX1_MOUSE		21.4	322	35731	Nuclease-sensitive element-binding protein 1 OS=Mus musculus GN=Ybx1 PE=1 SV=3	10	10	1	4	1	0	0	2	2	1	4	1	0	0	2	2	1	4	1	0	0	2	2	1	7.28571	0.285714	0	0	4.14286	1.14286	0.428571	1.89796	FALSE	TRUE	2	3	TRUE	1.89286	1.90476	-0.00904514	-0.486462
718	1	S22AI_MOUSE	S22AI_MOUSE		6.2	406	43014	Solute carrier family 22 member 18 OS=Mus musculus GN=Slc22a18 PE=2 SV=2	8	8	1	2	0	1	1	1	0	3	2	0	1	1	1	0	3	2	0	1	1	1	0	3	4.14286	0	0.626143	4.14286	2.85714	0	1.43871	1.88682	FALSE	TRUE	3	2	TRUE	2.22796	1.43195	0.637743	0.043776
1148	1	CXXC1_MOUSE	CXXC1_MOUSE		6.8	660	76168	CpG-binding protein OS=Mus musculus GN=Cxxc1 PE=2 SV=1	6	6	1	1	0	1	0	3	0	1	1	0	1	0	3	0	1	1	0	1	0	3	0	1	2.85714	0	0.857143	2.14286	6.43614	0.285714	0.626143	1.88645	FALSE	TRUE	2	2	TRUE	1.46429	2.44933	-0.742192	-1.29529
1153	1	RBM33_MOUSE	RBM33_MOUSE		6.8	1231	137326	RNA-binding protein 33 OS=Mus musculus GN=Rbm33 PE=1 SV=2	11	11	1	1	3	3	0	0	3	1	1	3	3	0	0	3	1	1	3	3	0	0	3	1	2.85714	1.57143	2.28571	2.17457	1.28571	2.37143	0.642857	1.88412	FALSE	TRUE	3	2	TRUE	2.22221	1.43333	0.632624	-0.069304
1253	1	CQ049_MOUSE	CQ049_MOUSE		24.6	171	17997	MLL1/MLL complex subunit C17orf49 homolog OS=Mus musculus PE=1 SV=1	8	8	1	0	3	0	1	0	0	4	0	3	0	1	0	0	4	0	3	0	1	0	0	4	1.42857	1.75	0.285714	5.294	1.42857	0.285714	2.60971	1.8689	FALSE	TRUE	2	1	FALSE	2.18957	1.44133	0.603244	-0.156956
1321	1	ABCBB_MOUSE	ABCBB_MOUSE		3.6	1321	146678	Bile salt export pump OS=Mus musculus GN=Abcb11 PE=1 SV=1	7	7	1	2	0	4	0	0	1	0	2	0	4	0	0	1	0	2	0	4	0	0	1	0	4.77686	0	2.85714	2.85714	1.57143	1	0	1.86608	FALSE	TRUE	2	1	FALSE	2.62279	0.857143	1.61349	0.831107
1110	1	RL17_MOUSE	RL17_MOUSE		13	184	21424	60S ribosomal protein L17 OS=Mus musculus GN=Rpl17 PE=2 SV=3	11	11	1	1	2	3	0	0	4	1	1	2	3	0	0	4	1	1	2	3	0	0	4	1	2.85714	1.14286	2.28571	1.85714	1.14286	3.19043	0.572857	1.86414	FALSE	TRUE	3	2	TRUE	2.03571	1.63538	0.315908	-0.278457
601	1	HIRA_MOUSE	HIRA_MOUSE		7.9	1015	111768	Protein HIRA OS=Mus musculus GN=Hira PE=1 SV=3	11	11	1	3	0	3	0	1	2	2	3	0	3	0	1	2	2	3	0	3	0	1	2	2	5.85714	0	1.96643	0.571429	2.47271	1.28571	0.881	1.86206	FALSE	TRUE	2	3	TRUE	2.09875	1.54648	0.440546	-0.122376
510	1	PSMD1_MOUSE	PSMD1_MOUSE		12.8	953	105731	26S proteasome non-ATPase regulatory subunit 1 OS=Mus musculus GN=Psmd1 PE=1 SV=1	10	10	1	3	3	2	1	0	0	1	3	3	2	1	0	0	1	3	3	2	1	0	0	1	5.85714	1.42857	1.14286	3.85714	0.285714	0	0.428571	1.85714	FALSE	TRUE	4	1	TRUE	3.07143	0.238095	3.6893	2.71893
643	1	CP3AD_MOUSE	CP3AD_MOUSE		14.5	503	57493	Cytochrome P450 3A13 OS=Mus musculus GN=Cyp3a13 PE=2 SV=1	15	15	1	1	6	2	0	0	6	0	1	6	2	0	0	6	0	1	6	2	0	0	6	0	2.28571	3.90443	1.14286	0.642857	0.428571	4.57143	0	1.85369	FALSE	TRUE	3	1	TRUE	1.99396	1.66667	0.258674	-0.175092
1274	1	XPO4_MOUSE	XPO4_MOUSE		2	1151	129966	Exportin-4 OS=Mus musculus GN=Xpo4 PE=1 SV=1	11	11	1	0	0	4	0	0	1	6	0	0	4	0	0	1	6	0	0	4	0	0	1	6	1.42857	0	2.85714	2.43871	1.42857	0.933429	3.76186	1.83547	FALSE	TRUE	1	2	TRUE	1.68111	2.04129	-0.280066	-0.704073
492	1	GATA4_MOUSE	GATA4_MOUSE		19.5	440	44544	Transcription factor GATA-4 OS=Mus musculus GN=Gata4 PE=1 SV=3	15	13	0.867	0	5	2	1	1	3	3	0	5	0	1	1	3	3	0	5	0	1	1	3	3	0.142857	2.85714	0	3.75157	2.347	2.23586	1.42857	1.82329	FALSE	TRUE	3	3	TRUE	1.68789	2.00381	-0.247522	-0.68243
1189	1	SYF2_MOUSE	SYF2_MOUSE		21.1	242	28713	Pre-mRNA-splicing factor SYF2 OS=Mus musculus GN=Syf2 PE=2 SV=1	7	7	1	1	0	2	1	0	0	3	1	0	2	1	0	0	3	1	0	2	1	0	0	3	2.85714	0	1.42857	4.873	1.36514	0.285714	1.91071	1.81718	FALSE	TRUE	3	1	TRUE	2.28968	1.18719	0.947594	0.496229
1192	1	RAB1B_MOUSE	RAB1B_MOUSE		34.8	201	22188	Ras-related protein Rab-1B OS=Mus musculus GN=Rab1b PE=1 SV=1	41	5	0.122	4	11	6	2	2	11	5	0	3	0	0	0	2	0	0	7	0	0	0	3.8	0	1.24229	4.71429	0.285714	2.28571	1.38657	2.8	0	1.81637	FALSE	FALSE	4	3	TRUE	2.132	1.39552	0.611401	0.130051
352	1	RAB6B_MOUSE	RAB6B_MOUSE		13.9	208	23463	Ras-related protein Rab-6B OS=Mus musculus GN=Rab6b PE=1 SV=1	27	4	0.148	0	6	5	4	1	7	4	0	0	0	3	1	0	0	0	0	0	4	1	0	0	0	0	0	10.4286	2.28571	0	0	1.81633	FALSE	FALSE	3	3	TRUE	2.60714	0.761905	1.77479	1.29317
1346	1	PSA4_MOUSE	PSA4_MOUSE		17.6	261	29472	Proteasome subunit alpha type-4 OS=Mus musculus GN=Psma4 PE=1 SV=1	9	9	1	0	3	3	0	0	1	2	0	3	3	0	0	1	2	0	3	3	0	0	1	2	1.5	1.85714	2.28571	2.85714	1.85714	1	1.28571	1.80612	FALSE	TRUE	2	2	TRUE	2.125	1.38095	0.621799	0.203295
1111	1	PNO1_MOUSE	PNO1_MOUSE		16.1	248	27455	RNA-binding protein PNO1 OS=Mus musculus GN=Pno1 PE=2 SV=1	12	12	1	0	1	3	0	0	4	4	0	1	3	0	0	4	4	0	1	3	0	0	4	4	1.14286	0.428571	2.28571	1.87243	1.14286	3.21771	2.47271	1.79469	FALSE	TRUE	2	2	TRUE	1.43239	2.27776	-0.66919	-1.04621
1296	1	SO1B2_MOUSE	SO1B2_MOUSE		11	689	76730	Solute carrier organic anion transporter family member 1B2 OS=Mus musculus GN=Slco1b2 PE=1 SV=1	8	8	1	0	2	4	0	1	1	0	0	2	4	0	1	1	0	0	2	4	0	1	1	0	1.42857	1.14286	2.85714	2.61429	3.51943	1	0	1.79461	FALSE	TRUE	2	2	TRUE	2.01071	1.50648	0.41653	-0.0264885
1004	1	TE2IP_MOUSE	TE2IP_MOUSE		19.1	393	43354	Telomeric repeat-binding factor 2-interacting protein 1 OS=Mus musculus GN=Terf2ip PE=1 SV=1	14	14	1	0	2	2	0	0	4	6	0	2	2	0	0	4	6	0	2	2	0	0	4	6	1	1.00657	1.38657	1.42857	1	3	3.71229	1.79057	FALSE	TRUE	2	2	TRUE	1.20543	2.57076	-1.09265	-1.46415
196	1	SPTA2_MOUSE	SPTA2_MOUSE		8.3	2472	284598	Spectrin alpha chain, brain OS=Mus musculus GN=Sptan1 PE=1 SV=4	16	16	1	1	6	5	0	1	1	2	1	6	5	0	1	1	2	1	6	5	0	1	1	2	1.881	3.64286	3.28571	0	2.28571	0.571429	0.857143	1.78912	FALSE	TRUE	3	3	TRUE	2.20239	1.2381	0.83095	0.766426
888	1	CA131_MOUSE	CA131_MOUSE		22.8	281	31345	Uncharacterized protein C1orf131 homolog OS=Mus musculus PE=1 SV=1	10	10	1	1	1	2	0	2	0	4	1	1	2	0	2	0	4	1	1	2	0	2	0	4	2.61429	0.428571	1.30614	1.14286	4.57143	0	2.37143	1.77639	FALSE	TRUE	3	2	TRUE	1.37296	2.31429	-0.753273	-1.3893
1288	1	ENY2_MOUSE	ENY2_MOUSE		15.8	101	11530	Enhancer of yellow 2 transcription factor homolog OS=Mus musculus GN=Eny2 PE=2 SV=1	10	10	1	0	2	3	0	0	2	3	0	2	3	0	0	2	3	0	2	3	0	0	2	3	1.42857	1.14286	2.28571	2.565	1.42857	1.57143	2	1.77459	FALSE	TRUE	2	2	TRUE	1.85554	1.66667	0.15487	-0.215211
796	1	HMBX1_MOUSE	HMBX1_MOUSE		8.6	419	47117	Homeobox-containing protein 1 OS=Mus musculus GN=Hmbox1 PE=2 SV=1	29	11	0.379	1	8	4	0	0	4	12	1	3	1	0	0	2	4	1	4.071	1.3	0	0	2.5	5.524	2.42857	2.43871	0.9	0.897571	0.747286	1.78571	3.21771	1.77365	FALSE	TRUE	3	2	TRUE	1.66621	1.9169	-0.202205	-0.474741
696	1	RIF1_MOUSE	RIF1_MOUSE		6.4	2419	266229	Telomere-associated protein RIF1 OS=Mus musculus GN=Rif1 PE=1 SV=2	9	9	1	1	2	1	1	1	2	1	1	2	1	1	1	2	1	1	2	1	1	1	2	1	2.31629	0.857143	0.572857	4.14286	2.76514	1.32143	0.428571	1.77204	FALSE	TRUE	4	3	TRUE	1.97229	1.50505	0.390059	0.190068
355	1	DAD1_MOUSE	DAD1_MOUSE		19.5	113	12498	Dolichyl-diphosphooligosaccharide--protein glycosyltransferase subunit DAD1 OS=Mus musculus GN=Dad1 PE=2 SV=3	12	12	1	2	5	1	0	2	1	1	2	5	1	0	2	1	1	2	5	1	0	2	1	1	3.884	2.85714	0.571429	0	4.14286	0.642857	0.285714	1.76914	FALSE	TRUE	3	3	TRUE	1.82814	1.69048	0.112949	-0.103466
1043	1	EXOS4_MOUSE	EXOS4_MOUSE		16.3	245	26251	Exosome complex exonuclease RRP41 OS=Mus musculus GN=Exosc4 PE=2 SV=3	13	13	1	0	2	4	0	0	3	4	0	2	4	0	0	3	4	0	2	4	0	0	3	4	1.03571	1.07143	2.85714	1.5	1.14286	2.33929	2.43257	1.76843	FALSE	TRUE	2	2	TRUE	1.61607	1.97157	-0.286855	-0.368173
49	1	TITIN_MOUSE	TITIN_MOUSE		0.4	35213	3906489	Titin OS=Mus musculus GN=Ttn PE=1 SV=1	8	8	1	2	1	1	2	1	0	1	2	1	1	2	1	0	1	2	1	1	2	1	0	1	3.51943	0.142857	0.428571	5.85714	2.14286	0	0.285714	1.76808	FALSE	TRUE	4	2	TRUE	2.487	0.809524	1.61926	1.79541
1180	1	RFC5_MOUSE	RFC5_MOUSE		15	339	38097	Replication factor C subunit 5 OS=Mus musculus GN=Rfc5 PE=2 SV=1	11	11	1	0	5	3	0	0	1	2	0	5	3	0	0	1	2	0	5	3	0	0	1	2	1.19043	3.21771	2.28571	2.28571	1.35714	0.892857	1.14286	1.76749	FALSE	TRUE	2	2	TRUE	2.24489	1.13095	0.989108	1.03731
714	1	RS27L_MOUSE	RS27L_MOUSE		38.1	84	9478	40S ribosomal protein S27-like OS=Mus musculus GN=Rps27l PE=2 SV=3	15	15	1	1	3	4	0	0	4	3	1	3	4	0	0	4	3	1	3	4	0	0	4	3	2.33929	1.42857	2.85714	0.857143	0.571429	2.85714	1.42857	1.76276	FALSE	TRUE	3	2	TRUE	1.87054	1.61905	0.208306	0.3269
1327	1	DNJB1_MOUSE	DNJB1_MOUSE		9.7	340	38168	DnaJ homolog subfamily B member 1 OS=Mus musculus GN=Dnajb1 PE=2 SV=3	9	9	1	0	2	3	0	0	2	2	0	2	3	0	0	2	2	0	2	3	0	0	2	2	1.42857	1.14286	2.28571	2.85714	1.72929	1.57143	1.28571	1.75724	FALSE	TRUE	2	2	TRUE	1.92857	1.52881	0.335124	0.323818
860	1	RYBP_MOUSE	RYBP_MOUSE		25.9	228	24778	RING1 and YY1-binding protein OS=Mus musculus GN=Rybp PE=1 SV=1	13	13	1	1	1	4	0	0	1	6	1	1	4	0	0	1	6	1	1	4	0	0	1	6	2.565	0.428571	2.85714	1.14286	0.857143	0.857143	3.53371	1.7488	FALSE	TRUE	3	2	TRUE	1.74839	1.74933	-0.00077583	-0.00404414
195	1	ASSY_MOUSE	ASSY_MOUSE		20.1	412	46585	Argininosuccinate synthase OS=Mus musculus GN=Ass1 PE=1 SV=1	16	16	1	0	6	3	1	0	4	2	0	6	3	1	0	4	2	0	6	3	1	0	4	2	0	3.64286	1.57143	3.28571	0	2.85714	0.857143	1.7449	FALSE	TRUE	3	2	TRUE	2.125	1.2381	0.779341	0.664555
481	1	CO6A2_MOUSE	CO6A2_MOUSE		7.8	1034	110335	Collagen alpha-2(VI) chain OS=Mus musculus GN=Col6a2 PE=2 SV=3	18	18	1	0	3	2	0	0	8	5	0	3	2	0	0	8	5	0	3	2	0	0	8	5	0	1.42857	1.14286	0.285714	0.142857	6.29386	2.85714	1.73586	FALSE	TRUE	2	2	TRUE	0.714286	3.09795	-2.11674	-2.06269
1202	1	SUN1_MOUSE	SUN1_MOUSE		8.3	913	101977	SUN domain-containing protein 1 OS=Mus musculus GN=Sun1 PE=1 SV=2	9	9	1	1	5	0	0	0	1	2	1	5	0	0	0	1	2	1	5	0	0	0	1	2	2.85714	3.22857	0.285714	2.28571	1.42857	0.895429	1.14286	1.732	FALSE	TRUE	2	2	TRUE	2.16429	1.15562	0.905225	0.714463
801	1	SIRT7_MOUSE	SIRT7_MOUSE		7.7	402	45147	NAD-dependent deacetylase sirtuin-7 OS=Mus musculus GN=Sirt7 PE=2 SV=2	15	15	1	0	7	2	0	0	3	3	0	7	2	0	0	3	3	0	7	2	0	0	3	3	0.714286	4.57143	1.28571	0.933286	0.760429	2.28571	1.57143	1.73176	FALSE	TRUE	2	2	TRUE	1.87618	1.53919	0.285625	0.114646
787	1	SLU7_MOUSE	SLU7_MOUSE		8.5	585	68081	Pre-mRNA-splicing factor SLU7 OS=Mus musculus GN=Slu7 PE=1 SV=1	14	14	1	0	2	2	0	1	2	7	0	2	2	0	1	2	7	0	2	2	0	1	2	7	0.666714	0.892857	1.22443	0.881	2.85714	1.42857	4.14286	1.72765	FALSE	TRUE	2	3	TRUE	0.91625	2.80952	-1.61651	-1.52618
1311	1	HDGR3_MOUSE	HDGR3_MOUSE		19.3	202	22432	Hepatoma-derived growth factor-related protein 3 OS=Mus musculus GN=Hdgfrp3 PE=1 SV=2	11	7	0.636	1	2	0	0	0	1	7	1	2	0	0	0	1	3	1	2	0	0	0	1	3.222	3.00486	1.14286	0.285714	2.85714	1.50743	1	2.17457	1.71037	FALSE	TRUE	2	2	TRUE	1.82264	1.56067	0.223869	0.142784
407	1	PP1G_MOUSE	PP1G_MOUSE		46.1	323	36985	Serine/threonine-protein phosphatase PP1-gamma catalytic subunit OS=Mus musculus GN=Ppp1cc PE=1 SV=1	560	3	0.005	34	95	84	45	47	126	129	0	1	0	0	0	2	0	0	4.939	0	0	0	11.583	0	0	2.76514	0	0	0	9.19043	0	1.70794	FALSE	FALSE	4	3	TRUE	0.691286	3.06348	-2.14782	-1.90264
894	1	N42L2_MOUSE	N42L2_MOUSE		13.6	575	66251	NEDD4-binding protein 2-like 2 OS=Mus musculus GN=N4bp2l2 PE=2 SV=2	11	11	1	1	1	0	0	0	7	2	1	1	0	0	0	7	2	1	1	0	0	0	7	2	2.61571	0.428571	0	1.14286	0.857143	5.85714	1.01857	1.70286	FALSE	TRUE	2	2	TRUE	1.04679	2.57762	-1.30007	-1.12201
1086	1	IF2B_MOUSE	IF2B_MOUSE		19.3	331	38093	Eukaryotic translation initiation factor 2 subunit 2 OS=Mus musculus GN=Eif2s2 PE=1 SV=1	7	7	1	3	1	1	0	0	2	0	3	1	1	0	0	2	0	3	1	1	0	0	2	0	6.42857	0.428571	0.857143	1.579	1.14286	1.42857	0	1.69496	FALSE	TRUE	3	1	TRUE	2.32332	0.857143	1.43858	1.40345
140	1	ZBT7A_MOUSE	ZBT7A_MOUSE		16	569	60282	Zinc finger and BTB domain-containing protein 7A OS=Mus musculus GN=Zbtb7a PE=1 SV=2	8	8	1	1	0	2	2	1	0	2	1	0	2	2	1	0	2	1	0	2	2	1	0	2	1.85714	0	1	5.85714	2.28571	0	0.857143	1.69388	FALSE	TRUE	3	2	TRUE	2.17857	1.04762	1.05627	0.799939
134	1	PRS6A_MOUSE	PRS6A_MOUSE		20.4	442	49494	26S protease regulatory subunit 6A OS=Mus musculus GN=Psmc3 PE=2 SV=1	13	13	1	0	2	6	1	1	2	1	0	2	6	1	1	2	1	0	2	6	1	1	2	1	0	0.714286	4.14286	3.21771	2.28571	1.14286	0.285714	1.68416	FALSE	TRUE	3	3	TRUE	2.01871	1.2381	0.705314	0.262825
773	1	PSD11_MOUSE	PSD11_MOUSE		12.3	422	47438	26S proteasome non-ATPase regulatory subunit 11 OS=Mus musculus GN=Psmd11 PE=1 SV=3	8	8	1	3	2	1	0	1	0	1	3	2	1	0	1	0	1	3	2	1	0	1	0	1	6.06457	0.877571	0.657143	0.857143	2.85714	0	0.428571	1.67745	FALSE	TRUE	3	2	TRUE	2.11411	1.09524	0.948804	0.391944
1106	1	ZN318_MOUSE	ZN318_MOUSE		2.9	2064	228221	Zinc finger protein 318 (Fragment) OS=Mus musculus GN=Znf318 PE=1 SV=2	8	8	1	1	2	2	0	1	1	1	1	2	2	0	1	1	1	1	2	2	0	1	1	1	2.85714	1.14286	1.42857	1.85714	3	0.857143	0.571429	1.67347	FALSE	TRUE	3	3	TRUE	1.82143	1.47619	0.303192	-0.0535387
908	1	PTAD1_MOUSE	PTAD1_MOUSE		8.6	362	43132	Protein tyrosine phosphatase-like protein PTPLAD1 OS=Mus musculus GN=Ptplad1 PE=1 SV=2	13	13	1	0	2	7	0	0	1	3	0	2	7	0	0	1	3	0	2	7	0	0	1	3	0.857143	1	5.33543	1.17	0.857143	0.857143	1.579	1.66512	FALSE	TRUE	2	2	TRUE	2.09064	1.09776	0.929381	0.402774
683	1	REXO4_MOUSE	REXO4_MOUSE		20.4	432	47600	RNA exonuclease 4 OS=Mus musculus GN=Rexo4 PE=2 SV=2	12	12	1	1	2	1	0	1	3	4	1	2	1	0	1	3	4	1	2	1	0	1	3	4	2.28571	0.857143	0.571429	0.724857	2.61429	2.28571	2.31629	1.66506	FALSE	TRUE	3	3	TRUE	1.10979	2.40543	-1.11601	-0.848911
790	1	ZN592_MOUSE	ZN592_MOUSE		9.7	1262	137515	Zinc finger protein 592 OS=Mus musculus GN=Znf592 PE=1 SV=3	11	11	1	1	2	0	0	1	4	3	1	2	0	0	1	4	3	1	2	0	0	1	4	3	2.42857	0.895429	0	0.892857	2.85714	2.85714	1.57143	1.64322	FALSE	TRUE	2	3	TRUE	1.05421	2.42857	-1.20394	-0.998064
808	1	FBX38_MOUSE	FBX38_MOUSE		4.4	1194	133929	F-box only protein 38 OS=Mus musculus GN=Fbxo38 PE=1 SV=1	11	11	1	1	2	2	0	1	2	3	1	2	2	0	1	2	3	1	2	2	0	1	2	3	2.43257	0.897571	1.28571	1	2.85714	1.42857	1.57143	1.639	FALSE	TRUE	3	3	TRUE	1.40396	1.95238	-0.475728	-0.537114
981	1	RPR1A_MOUSE	RPR1A_MOUSE		15.1	312	35702	Regulation of nuclear pre-mRNA domain-containing protein 1A OS=Mus musculus GN=Rprd1a PE=2 SV=1	23	11	0.478	0	7	3	1	0	4	8	0	5	1	0	0	1	4	0	5.278	1.077	0	0	1.13	4.667	0.897571	3.426	0.868143	1.42857	1	1.01857	2.76514	1.62914	FALSE	TRUE	3	2	TRUE	1.65507	1.59457	0.0537248	-0.263105
680	1	PCNP_MOUSE	PCNP_MOUSE		36	178	18964	PEST proteolytic signal-containing nuclear protein OS=Mus musculus GN=Pcnp PE=1 SV=1	15	15	1	0	7	2	0	0	3	3	0	7	2	0	0	3	3	0	7	2	0	0	3	3	0.571429	4.57143	1.14286	0.714286	0.571429	2.28571	1.42857	1.61224	FALSE	TRUE	2	2	TRUE	1.75	1.42857	0.292782	-0.251719
687	1	MSL1_MOUSE	MSL1_MOUSE		18.2	616	67321	Male-specific lethal 1 homolog OS=Mus musculus GN=Msl1 PE=2 SV=1	9	9	1	4	2	2	0	0	0	1	4	2	2	0	0	0	1	4	2	2	0	0	0	1	7.5	0.857143	1.14286	0.760429	0.571429	0	0.428571	1.60863	FALSE	TRUE	3	1	TRUE	2.56511	0.333333	2.94398	1.43083
497	1	PP4R2_MOUSE	PP4R2_MOUSE		15.1	417	46480	Serine/threonine-protein phosphatase 4 regulatory subunit 2 OS=Mus musculus GN=Ppp4r2 PE=1 SV=1	7	7	1	0	2	2	3	0	0	0	0	2	2	3	0	0	0	0	2	2	3	0	0	0	0.285714	0.857143	1.14286	8.66943	0.285714	0	0	1.60584	FALSE	TRUE	3	0	TRUE	2.73879	0.0952381	4.84585	2.55059
1386	1	PSA7_MOUSE	PSA7_MOUSE		11.7	248	27856	Proteasome subunit alpha type-7 OS=Mus musculus GN=Psma7 PE=1 SV=1	3	3	1	2	1	0	0	0	0	0	2	1	0	0	0	0	0	2	1	0	0	0	0	0	4.89614	0.571429	0.285714	2.85714	2	0.428571	0.142857	1.59741	FALSE	TRUE	2	0	FALSE	2.15261	0.857143	1.32848	0.463963
1147	1	PIN4_MOUSE	PIN4_MOUSE		30.5	131	13816	Peptidyl-prolyl cis-trans isomerase NIMA-interacting 4 OS=Mus musculus GN=Pin4 PE=2 SV=1	10	10	1	0	2	2	0	0	0	6	0	2	2	0	0	0	6	0	2	2	0	0	0	6	1.14286	1.14286	1.42857	2.14286	1.28571	0.285714	3.724	1.59322	FALSE	TRUE	2	1	FALSE	1.46429	1.76514	-0.269588	-0.465938
1228	1	RRP8_MOUSE	RRP8_MOUSE		9.2	457	51067	Ribosomal RNA-processing protein 8 OS=Mus musculus GN=Rrp8 PE=1 SV=1	5	5	1	0	0	0	0	2	3	0	0	0	0	0	2	3	0	0	0	0	0	2	3	0	1.35614	0	0.285714	2.28571	4.78414	2.42857	0	1.59147	FALSE	TRUE	0	2	TRUE	0.981893	2.40424	-1.29194	-1.06686
592	1	MRE11_MOUSE	MRE11_MOUSE		5.2	706	80224	Double-strand break repair protein MRE11A OS=Mus musculus GN=Mre11a PE=2 SV=1	14	14	1	0	5	3	0	1	1	4	0	5	3	0	1	1	4	0	5	3	0	1	1	4	0.285714	2.85714	1.96429	0.571429	2.43257	0.714286	2.28571	1.58731	FALSE	TRUE	2	3	TRUE	1.41964	1.81086	-0.351145	-0.468675
1218	1	ING5_MOUSE	ING5_MOUSE		8.8	240	27800	Inhibitor of growth protein 5 OS=Mus musculus GN=Ing5 PE=1 SV=1	10	8	0.8	0	5	1	0	0	2	2	0	3	1	0	0	2	2	0	4.5	1	0	0	2	2	1.28571	2.57143	0.857143	2.28571	1.42857	1.48571	1.14286	1.57959	FALSE	TRUE	2	2	TRUE	1.75	1.35238	0.371853	-0.0919879
1284	1	TF2H2_MOUSE	TF2H2_MOUSE		4.8	396	44688	General transcription factor IIH subunit 2 OS=Mus musculus GN=Gtf2h2 PE=1 SV=1	8	8	1	0	3	2	0	0	0	3	0	3	2	0	0	0	3	0	3	2	0	0	0	3	1.42857	1.77686	1.42857	2.511	1.42857	0.428571	2	1.57173	FALSE	TRUE	2	1	FALSE	1.78625	1.28571	0.474364	-0.0659488
965	1	PLBL1_MOUSE	PLBL1_MOUSE		5.8	550	62999	Putative phospholipase B-like 1 OS=Mus musculus GN=Plbd1 PE=1 SV=1	11	11	1	0	4	1	0	0	5	1	0	4	1	0	0	5	1	0	4	1	0	0	5	1	0.877571	2.28571	0.761857	1.42857	0.933429	4.14286	0.571429	1.57163	FALSE	TRUE	2	2	TRUE	1.33843	1.88257	-0.492164	-0.666066
618	1	SYCP1_MOUSE	SYCP1_MOUSE		2.6	993	115964	Synaptonemal complex protein 1 OS=Mus musculus GN=Sycp1 PE=1 SV=1	4	4	1	2	0	0	2	0	0	0	2	0	0	2	0	0	0	2	0	0	2	0	0	0	4.14286	0	0	6.42857	0.428571	0	0	1.57143	FALSE	TRUE	2	0	FALSE	2.64286	0.142857	4.20945	2.05594
829	1	THIM_MOUSE	THIM_MOUSE		13.1	397	41859	3-ketoacyl-CoA thiolase, mitochondrial OS=Mus musculus GN=Acaa2 PE=1 SV=2	12	12	1	0	1	3	0	0	6	2	0	1	3	0	0	6	2	0	1	3	0	0	6	2	0.747286	0.428571	2.23586	1.00457	0.857143	4.71429	1	1.56967	FALSE	TRUE	2	2	TRUE	1.10407	2.19048	-0.988411	-0.947299
73	1	CLOCK_MOUSE	CLOCK_MOUSE		3.2	855	96394	Circadian locomoter output cycles protein kaput OS=Mus musculus GN=Clock PE=1 SV=1	6	6	1	3	0	1	1	1	0	0	3	0	1	1	1	0	0	3	0	1	1	1	0	0	5.3	0	0.428571	3.00486	2.17457	0	0	1.55829	FALSE	TRUE	3	1	TRUE	2.18336	0.724857	1.59078	0.629892
439	1	RAD50_MOUSE	RAD50_MOUSE		6.9	1312	153489	DNA repair protein RAD50 OS=Mus musculus GN=Rad50 PE=1 SV=1	15	15	1	0	3	5	0	1	2	4	0	3	5	0	1	2	4	0	3	5	0	1	2	4	0	1.42857	3.426	0.285714	2.33714	1.14286	2.28571	1.558	FALSE	TRUE	2	3	TRUE	1.28507	1.9219	-0.580688	-0.519147
1244	1	FOXP4_MOUSE	FOXP4_MOUSE		7.4	795	85982	Forkhead box protein P4 OS=Mus musculus GN=Foxp4 PE=1 SV=1	6	6	1	0	1	3	0	1	0	1	0	1	3	0	1	0	1	0	1	3	0	1	0	1	1.38657	0.571429	2.28571	2.33929	3.29914	0.285714	0.714286	1.55459	FALSE	TRUE	2	2	TRUE	1.64575	1.43305	0.199659	0.0698547
1139	1	FCF1_MOUSE	FCF1_MOUSE		17.2	198	23342	rRNA-processing protein FCF1 homolog OS=Mus musculus GN=Fcf1 PE=2 SV=2	10	10	1	0	4	1	0	0	2	3	0	4	1	0	0	2	3	0	4	1	0	0	2	3	1.14286	2.347	0.857143	2	1.22443	1.42857	1.85714	1.55102	FALSE	TRUE	2	2	TRUE	1.58675	1.50338	0.0778642	-0.0363323
887	1	COPA_MOUSE	COPA_MOUSE		3.9	1224	138447	Coatomer subunit alpha OS=Mus musculus GN=Copa PE=1 SV=1	9	9	1	1	2	1	0	1	2	2	1	2	1	0	1	2	2	1	2	1	0	1	2	2	2.60971	1	0.714286	1.14286	2.85714	1.42857	1.00657	1.53702	FALSE	TRUE	3	3	TRUE	1.36671	1.7641	-0.368217	-0.398417
1169	1	MED7_MOUSE	MED7_MOUSE		18.9	233	27206	Mediator of RNA polymerase II transcription subunit 7 OS=Mus musculus GN=Med7 PE=2 SV=2	9	9	1	0	3	3	0	0	0	3	0	3	3	0	0	0	3	0	3	3	0	0	0	3	1.14286	1.57143	2.28571	2.23557	1.30614	0.285714	1.91043	1.53398	FALSE	TRUE	2	1	FALSE	1.80889	1.16743	0.631773	0.317745
1143	1	BCCIP_MOUSE	BCCIP_MOUSE		11.1	316	35943	BRCA2 and CDKN1A-interacting protein OS=Mus musculus GN=Bccip PE=2 SV=1	10	10	1	0	3	2	0	0	1	4	0	3	2	0	0	1	4	0	3	2	0	0	1	4	1.14286	1.53571	1.42857	2	1.24229	0.868143	2.511	1.53265	FALSE	TRUE	2	2	TRUE	1.52679	1.54048	-0.0128788	-0.128455
1348	1	BMAL1_MOUSE	BMAL1_MOUSE		7.9	632	69453	Aryl hydrocarbon receptor nuclear translocator-like protein 1 OS=Mus musculus GN=Arntl PE=1 SV=2	6	6	1	0	0	1	0	0	1	4	0	0	1	0	0	1	4	0	0	1	0	0	1	4	1.50743	0	0.857143	2.85714	1.87243	1	2.62929	1.53192	FALSE	TRUE	1	2	TRUE	1.30543	1.8339	-0.490395	-0.448325
835	1	DOC10_MOUSE	DOC10_MOUSE		1.4	2150	245759	Dedicator of cytokinesis protein 10 OS=Mus musculus GN=Dock10 PE=1 SV=3	3	3	1	0	0	0	3	0	0	0	0	0	0	3	0	0	0	0	0	0	3	0	0	0	0.821429	0	0	9	0.857143	0	0	1.52551	FALSE	TRUE	1	0	FALSE	2.45536	0.285714	3.10329	1.97416
249	1	SUH_MOUSE	SUH_MOUSE		15.8	526	58538	Recombining binding protein suppressor of hairless OS=Mus musculus GN=Rbpj PE=1 SV=1	18	18	1	0	6	1	0	0	3	8	0	6	1	0	0	3	8	0	6	1	0	0	3	8	0	3.66171	0.428571	0	0	1.97957	4.57143	1.52018	FALSE	TRUE	2	2	TRUE	1.02257	2.18367	-1.09455	-0.955763
224	1	CP2DA_MOUSE	CP2DA_MOUSE		10.9	504	57234	Cytochrome P450 2D10 OS=Mus musculus GN=Cyp2d10 PE=2 SV=2	20	6	0.3	0	5	8	0	0	5	2	0	2	3	0	0	1	0	0	4.25	6.214	0	0	4.25	0	0	2.47271	4.602	0	0	3.556	0	1.51867	FALSE	FALSE	2	2	TRUE	1.76868	1.18533	0.577379	0.460704
138	1	HDAC3_MOUSE	HDAC3_MOUSE		11.1	424	48365	Histone deacetylase 3 OS=Mus musculus GN=Hdac3 PE=1 SV=1	14	14	1	0	1	3	0	2	1	7	0	1	3	0	2	1	7	0	1	3	0	2	1	7	0	0.285714	1.57143	0	3.99629	0.571429	4.14286	1.50967	FALSE	TRUE	2	3	TRUE	0.464286	2.90352	-2.64472	-2.44742
557	1	MYST2_MOUSE	MYST2_MOUSE		10.1	613	70642	Histone acetyltransferase MYST2 OS=Mus musculus GN=Myst2 PE=2 SV=1	16	5	0.313	0	4	3	0	0	5	4	0	1	1	0	0	2	1	0	4	3	0	0	5	2.5	0.285714	2.28571	1.91043	0.428571	0.285714	3.99629	1.35714	1.50708	FALSE	FALSE	2	2	TRUE	1.22761	1.87971	-0.614664	-0.642684
254	1	RAB5C_MOUSE	RAB5C_MOUSE		27.8	216	23414	Ras-related protein Rab-5C OS=Mus musculus GN=Rab5c PE=1 SV=2	20	7	0.35	2	6	1	0	1	5	5	2	2	1	0	0	2	0	2	4.667	1	0	0	5	0	3.75157	2.61429	0.428571	0	0	3.73214	0	1.5038	FALSE	TRUE	3	3	TRUE	1.69861	1.24405	0.449311	0.297687
1345	1	CETN2_MOUSE	CETN2_MOUSE		33.7	172	19798	Centrin-2 OS=Mus musculus GN=Cetn2 PE=1 SV=1	4	4	1	1	0	0	0	0	2	1	1	0	0	0	0	2	1	1	0	0	0	0	2	1	3.21771	0	0.285714	2.85714	1.85714	1.57143	0.714286	1.50049	FALSE	TRUE	1	2	TRUE	1.59014	1.38095	0.203493	0.042884
1077	1	MED24_MOUSE	MED24_MOUSE		4.5	987	109986	Mediator of RNA polymerase II transcription subunit 24 OS=Mus musculus GN=Med24 PE=1 SV=1	8	8	1	0	0	2	0	1	3	2	0	0	2	0	1	3	2	0	0	2	0	1	3	2	1.14286	0	1.42857	1.57143	2.85714	2.347	1.14286	1.49855	FALSE	TRUE	1	3	TRUE	1.03571	2.11567	-1.03049	-1.1024
1082	1	MLF2_MOUSE	MLF2_MOUSE		17.8	247	28056	Myeloid leukemia factor 2 OS=Mus musculus GN=Mlf2 PE=1 SV=1	7	7	1	1	4	0	0	1	1	0	1	4	0	0	1	1	0	1	4	0	0	1	1	0	2.85714	2.33929	0	1.57143	2.85714	0.857143	0	1.49745	FALSE	TRUE	2	2	TRUE	1.69196	1.2381	0.450577	0.223366
1340	1	TMED2_MOUSE	TMED2_MOUSE		10.4	201	22706	Transmembrane emp24 domain-containing protein 2 OS=Mus musculus GN=Tmed2 PE=1 SV=1	6	6	1	0	2	1	0	0	1	2	0	2	1	0	0	1	2	0	2	1	0	0	1	2	1.46943	1.14286	0.857143	2.85714	1.85714	1	1.28571	1.49563	FALSE	TRUE	2	2	TRUE	1.58164	1.38095	0.19576	-0.0148262
826	1	SENP7_MOUSE	SENP7_MOUSE		4.1	1037	116347	Sentrin-specific protease 7 OS=Mus musculus GN=Senp7 PE=2 SV=1	12	12	1	0	7	2	0	0	2	1	0	7	2	0	0	2	1	0	7	2	0	0	2	1	0.723857	4.57143	1.28571	1	0.857143	1.42857	0.571429	1.49116	FALSE	TRUE	2	2	TRUE	1.89525	0.952381	0.992777	0.704352
1372	1	SUMO3_MOUSE	SUMO3_MOUSE		19.1	110	12431	Small ubiquitin-related modifier 3 OS=Mus musculus GN=Sumo3 PE=2 SV=1	29	1	0.034	3	3	0	7	6	4	6	0	0	0	0	0	1	0	0	0	0	0	0	4	0	1.57143	0	0.285714	2.85714	2	3.48057	0.142857	1.47682	FALSE	FALSE	3	3	TRUE	1.17857	1.87448	-0.669448	-0.787358
902	1	SNR27_MOUSE	SNR27_MOUSE		23.2	155	18886	U4/U6.U5 small nuclear ribonucleoprotein 27 kDa protein OS=Mus musculus GN=Snrnp27 PE=2 SV=1	7	7	1	2	2	0	0	1	0	2	2	2	0	0	1	0	2	2	2	0	0	1	0	2	4.26529	1	0	1.14286	2.85714	0	1.05957	1.47498	FALSE	TRUE	2	2	TRUE	1.60204	1.30557	0.295225	0.0285984
1053	1	MOSC2_MOUSE	MOSC2_MOUSE		8.9	338	38195	MOSC domain-containing protein 2, mitochondrial OS=Mus musculus GN=Mosc2 PE=1 SV=1	9	9	1	0	6	1	0	0	1	1	0	6	1	0	0	1	1	0	6	1	0	0	1	1	1.07143	4.14286	0.857143	1.53571	1.14286	0.857143	0.571429	1.45408	FALSE	TRUE	2	2	TRUE	1.90179	0.857143	1.14975	0.840874
1226	1	MED27_MOUSE	MED27_MOUSE		8.7	311	35299	Mediator of RNA polymerase II transcription subunit 27 OS=Mus musculus GN=Med27 PE=2 SV=2	7	7	1	0	1	3	0	0	0	3	0	1	3	0	0	0	3	0	1	3	0	0	0	3	1.32143	0.571429	2.28571	2.28571	1.42857	0.285714	1.96643	1.44929	FALSE	TRUE	2	1	FALSE	1.61607	1.2269	0.397468	-0.0126279
282	1	SRPRB_MOUSE	SRPRB_MOUSE		23.4	269	29580	Signal recognition particle receptor subunit beta OS=Mus musculus GN=Srprb PE=1 SV=1	6	6	1	4	0	0	0	1	1	0	4	0	0	0	1	1	0	4	0	0	0	1	1	0	7.25	0	0	0	2.28571	0.571429	0	1.44388	FALSE	TRUE	1	2	TRUE	1.8125	0.952381	0.92837	0.507534
1344	1	NSDHL_MOUSE	NSDHL_MOUSE		12.7	362	40687	Sterol-4-alpha-carboxylate 3-dehydrogenase, decarboxylating OS=Mus musculus GN=Nsdhl PE=2 SV=1	5	5	1	0	3	1	0	0	0	1	0	3	1	0	0	0	1	0	3	1	0	0	0	1	1.48571	1.85714	0.857143	2.85714	1.85714	0.428571	0.714286	1.43673	FALSE	TRUE	2	1	FALSE	1.76429	1	0.819084	0.377873
1294	1	CCNL2_MOUSE	CCNL2_MOUSE		9.8	518	58006	Cyclin-L2 OS=Mus musculus GN=Ccnl2 PE=1 SV=1	5	5	1	1	1	0	0	0	1	2	1	1	0	0	0	1	2	1	1	0	0	0	1	2	3	0.571429	0.285714	2.57486	1.42857	1	1.17	1.43294	FALSE	TRUE	2	2	TRUE	1.608	1.19952	0.422806	-0.023452
418	1	RS10_MOUSE	RS10_MOUSE		23	165	18917	40S ribosomal protein S10 OS=Mus musculus GN=Rps10 PE=1 SV=1	16	16	1	0	5	6	0	0	1	4	0	5	6	0	0	1	4	0	5	6	0	0	1	4	0	2.85714	4.14286	0	0	0.714286	2.28571	1.42857	FALSE	TRUE	2	2	TRUE	1.75	1	0.807355	0.382232
692	1	GNL3L_MOUSE	GNL3L_MOUSE		10.7	577	65196	Guanine nucleotide-binding protein-like 3-like protein OS=Mus musculus GN=Gnl3l PE=2 SV=1	7	7	1	2	0	2	0	1	2	0	2	0	2	0	1	2	0	2	0	2	0	1	2	0	4.14286	0	1.14286	0.760429	2.61571	1.30686	0	1.4241	FALSE	TRUE	2	2	TRUE	1.51154	1.30752	0.209178	-0.185403
1328	1	ABT1_MOUSE	ABT1_MOUSE		17.1	269	30660	Activator of basal transcription 1 OS=Mus musculus GN=Abt1 PE=2 SV=1	3	3	1	0	0	0	0	1	0	2	0	0	0	0	1	0	2	0	0	0	0	1	0	2	1.42857	0	0.285714	2.85714	3.64286	0.428571	1.28571	1.41837	FALSE	TRUE	0	2	TRUE	1.14286	1.78571	-0.643856	-1.06896
189	1	PSMD3_MOUSE	PSMD3_MOUSE		18.3	530	60700	26S proteasome non-ATPase regulatory subunit 3 OS=Mus musculus GN=Psmd3 PE=2 SV=2	11	11	1	1	5	2	1	0	0	2	1	5	2	1	0	0	2	1	5	2	1	0	0	2	1.87243	2.85714	1.03571	3.28571	0	0	0.857143	1.41545	FALSE	TRUE	4	1	TRUE	2.26275	0.285714	2.98543	2.79356
463	1	KRT86_MOUSE	KRT86_MOUSE		22.8	486	53252	Keratin, type II cuticular Hb6 OS=Mus musculus GN=Krt86 PE=2 SV=2	29	4	0.138	6	5	0	0	18	0	0	1	3	0	0	0	0	0	3.5	5	0	0	0	0	0	6.75929	2.85714	0	0.285714	0	0	0	1.41459	FALSE	FALSE	2	1	FALSE	2.47554	0		-0.391725
1072	1	TINAL_MOUSE	TINAL_MOUSE		7.7	466	52666	Tubulointerstitial nephritis antigen-like OS=Mus musculus GN=Tinagl1 PE=1 SV=1	7	7	1	0	0	4	0	1	0	2	0	0	4	0	1	0	2	0	0	4	0	1	0	2	1.14286	0	2.85714	1.57143	2.85714	0.285714	1.14286	1.40816	FALSE	TRUE	1	2	TRUE	1.39286	1.42857	-0.0365259	-0.404706
304	1	DHB2_MOUSE	DHB2_MOUSE		19.9	381	41837	Estradiol 17-beta-dehydrogenase 2 OS=Mus musculus GN=Hsd17b2 PE=2 SV=2	9	9	1	0	4	2	1	1	1	0	0	4	2	1	1	1	0	0	4	2	1	1	1	0	0	2.28571	1.12857	3.53371	2.28571	0.595286	0	1.40414	FALSE	TRUE	3	2	TRUE	1.737	0.960333	0.854991	0.556567
1230	1	TF2H1_MOUSE	TF2H1_MOUSE		10.2	547	61852	General transcription factor IIH subunit 1 OS=Mus musculus GN=Gtf2h1 PE=2 SV=2	7	7	1	0	4	2	0	0	0	1	0	4	2	0	0	0	1	0	4	2	0	0	0	1	1.35714	2.35714	1.42857	2.28571	1.42857	0.285714	0.666714	1.40137	FALSE	TRUE	2	1	FALSE	1.85714	0.793667	1.22648	0.984471
1330	1	IIGP1_MOUSE	IIGP1_MOUSE		7	413	47573	Interferon-inducible GTPase 1 OS=Mus musculus GN=Iigp1 PE=1 SV=2	5	5	1	0	1	2	0	0	1	1	0	1	2	0	0	1	1	0	1	2	0	0	1	1	1.42857	0.571429	1.42857	2.85714	1.73586	1	0.714286	1.39084	FALSE	TRUE	2	2	TRUE	1.57143	1.15005	0.450383	0.296722
713	1	IF2A_MOUSE	IF2A_MOUSE		21.9	315	36109	Eukaryotic translation initiation factor 2 subunit 1 OS=Mus musculus GN=Eif2s1 PE=1 SV=3	10	10	1	0	3	2	0	2	0	3	0	3	2	0	2	0	3	0	3	2	0	2	0	3	0.571429	1.42857	1.15014	0.857143	4.28571	0	1.42857	1.3888	FALSE	TRUE	2	2	TRUE	1.00182	1.90476	-0.926985	-0.468736
1319	1	TINF2_MOUSE	TINF2_MOUSE		10.3	341	37858	TERF1-interacting nuclear factor 2 OS=Mus musculus GN=Tinf2 PE=2 SV=1	5	5	1	0	0	1	0	0	1	3	0	0	1	0	0	1	3	0	0	1	0	0	1	3	1.42857	0	0.857143	2.85714	1.57143	1	2	1.38776	FALSE	TRUE	1	2	TRUE	1.28571	1.52381	-0.245112	0.0342181
843	1	TAF2_MOUSE	TAF2_MOUSE		3.5	1104	126998	Transcription initiation factor TFIID subunit 2 OS=Mus musculus GN=Taf2 PE=2 SV=2	7	7	1	0	1	1	0	2	2	1	0	1	1	0	2	2	1	0	1	1	0	2	2	1	0.857143	0.428571	0.714286	1.12857	4.57143	1.42857	0.571429	1.38571	FALSE	TRUE	2	3	TRUE	0.782143	2.19048	-1.48574	-0.584463
1168	1	QCR1_MOUSE	QCR1_MOUSE		14.8	480	52770	Cytochrome b-c1 complex subunit 1, mitochondrial OS=Mus musculus GN=Uqcrc1 PE=1 SV=1	7	7	1	0	0	3	0	0	1	3	0	0	3	0	0	1	3	0	0	3	0	0	1	3	1.14286	0	2.28571	2.21429	1.29243	0.877571	1.881	1.38484	FALSE	TRUE	1	2	TRUE	1.41071	1.35033	0.0631102	0.220227
1254	1	MD2BP_MOUSE	MD2BP_MOUSE		9.4	276	31141	MAD2L1-binding protein OS=Mus musculus GN=Mad2l1bp PE=2 SV=2	6	6	1	0	2	1	0	0	3	0	0	2	1	0	0	3	0	0	2	1	0	0	3	0	1.42857	1.14286	0.857143	2.36729	1.42857	2.42857	0	1.379	FALSE	TRUE	2	1	FALSE	1.44896	1.28571	0.172452	0.243509
1063	1	WAC_MOUSE	WAC_MOUSE		12.7	646	70681	WW domain-containing adapter protein with coiled-coil OS=Mus musculus GN=Wac PE=1 SV=2	9	9	1	0	2	2	0	0	1	4	0	2	2	0	0	1	4	0	2	2	0	0	1	4	1.12857	1.07143	1.42857	1.57143	1.14286	0.857143	2.43871	1.37696	FALSE	TRUE	2	2	TRUE	1.3	1.47957	-0.186668	0.107992
1354	1	NCOR2_MOUSE	NCOR2_MOUSE		2.5	2472	270860	Nuclear receptor corepressor 2 OS=Mus musculus GN=Ncor2 PE=1 SV=2	4	4	1	0	0	1	0	0	0	3	0	0	1	0	0	0	3	0	0	1	0	0	0	3	1.53571	0	0.857143	2.85714	1.91043	0.428571	2	1.36986	FALSE	TRUE	1	1	FALSE	1.3125	1.44633	-0.140083	0.110931
744	1	LYRIC_MOUSE	LYRIC_MOUSE		7.8	579	63847	Protein LYRIC OS=Mus musculus GN=Mtdh PE=1 SV=1	9	9	1	2	3	1	0	0	1	2	2	3	1	0	0	1	2	2	3	1	0	0	1	2	4.14286	1.42857	0.642857	0.857143	0.657143	0.857143	1	1.36939	FALSE	TRUE	3	2	TRUE	1.76786	0.838095	1.07682	0.684597
1006	1	DDX1_MOUSE	DDX1_MOUSE		6.4	740	82501	ATP-dependent RNA helicase DDX1 OS=Mus musculus GN=Ddx1 PE=2 SV=1	10	10	1	0	3	1	0	0	2	4	0	3	1	0	0	2	4	0	3	1	0	0	2	4	1	1.42857	0.857143	1.42857	1	1.42857	2.42857	1.36735	FALSE	TRUE	2	2	TRUE	1.17857	1.61905	-0.458106	-0.188473
423	1	TBA4A_MOUSE	TBA4A_MOUSE		20.8	448	49925	Tubulin alpha-4A chain OS=Mus musculus GN=Tuba4a PE=1 SV=1	43	2	0.047	0	9	6	3	0	12	13	0	0	0	0	0	2	0	0	0	0	0	0	12	0	0	0	0	0.142857	0	9.40471	0	1.36394	FALSE	FALSE	3	2	TRUE	0.0357143	3.1349	-6.45578	-3.05414
1363	1	APC7_MOUSE	APC7_MOUSE		7.1	565	63022	Anaphase-promoting complex subunit 7 OS=Mus musculus GN=Anapc7 PE=1 SV=3	4	4	1	0	2	0	0	0	0	2	0	2	0	0	0	0	2	0	2	0	0	0	0	2	1.57143	1.14286	0.285714	2.85714	1.96429	0.428571	1.28571	1.36224	FALSE	TRUE	1	1	FALSE	1.46429	1.22619	0.256014	0.214187
411	1	SUMO1_MOUSE	SUMO1_MOUSE		18.8	101	11558	Small ubiquitin-related modifier 1 OS=Mus musculus GN=Sumo1 PE=1 SV=1	14	14	1	0	2	0	0	1	2	9	0	2	0	0	1	2	9	0	2	0	0	1	2	9	0	0.857143	0	0	2.32	1.14286	5.17186	1.35598	FALSE	TRUE	1	3	TRUE	0.214286	2.87824	-3.74758	-1.75986
394	1	GBB2_MOUSE	GBB2_MOUSE		14.1	340	37332	Guanine nucleotide-binding protein G(I)/G(S)/G(T) subunit beta-2 OS=Mus musculus GN=Gnb2 PE=1 SV=3	11	11	1	1	2	3	0	1	0	4	1	2	3	0	1	0	4	1	2	3	0	1	0	4	2.19043	0.857143	1.85714	0	2.28571	0	2.28571	1.35373	FALSE	TRUE	3	2	TRUE	1.22618	1.52381	-0.313513	-0.107291
1231	1	FTSJ2_MOUSE	FTSJ2_MOUSE		4.9	837	95677	S-adenosyl-L-methionine-dependent methyltransferase FTSJD2 OS=Mus musculus GN=Ftsjd2 PE=1 SV=1	5	5	1	1	1	0	0	0	1	2	1	1	0	0	0	1	2	1	1	0	0	0	1	2	2.85714	0.571429	0.285714	2.28571	1.42857	0.9	1.14286	1.35306	FALSE	TRUE	2	2	TRUE	1.5	1.15714	0.374396	0.204204
1306	1	ZMYM3_MOUSE	ZMYM3_MOUSE		3.4	1370	152880	Zinc finger MYM-type protein 3 OS=Mus musculus GN=Zmym3 PE=2 SV=1	5	5	1	0	1	2	0	0	0	2	0	1	2	0	0	0	2	0	1	2	0	0	0	2	1.42857	0.571429	1.42857	2.85714	1.48571	0.428571	1.19643	1.34235	FALSE	TRUE	2	1	FALSE	1.57143	1.0369	0.599793	0.304145
1336	1	ACOX1_MOUSE	ACOX1_MOUSE		8	661	74636	Peroxisomal acyl-coenzyme A oxidase 1 OS=Mus musculus GN=Acox1 PE=1 SV=4	4	4	1	0	1	3	0	0	0	0	0	1	3	0	0	0	0	0	1	3	0	0	0	0	1.43871	0.571429	2.28571	2.85714	1.77686	0.428571	0	1.33692	FALSE	TRUE	2	0	FALSE	1.78825	0.735143	1.28245	0.554078
1117	1	DHSB_MOUSE	DHSB_MOUSE		13.1	282	31815	Succinate dehydrogenase [ubiquinone] iron-sulfur subunit, mitochondrial OS=Mus musculus GN=Sdhb PE=1 SV=1	6	6	1	1	1	1	0	0	1	2	1	1	1	0	0	1	2	1	1	1	0	0	1	2	2.85714	0.571429	0.857143	1.91043	1.14286	0.859143	1.14286	1.33443	FALSE	TRUE	3	2	TRUE	1.54904	1.04829	0.563338	0.230481
549	1	BRE1A_MOUSE	BRE1A_MOUSE		8.9	973	113521	E3 ubiquitin-protein ligase BRE1A OS=Mus musculus GN=Rnf20 PE=1 SV=2	14	9	0.643	1	9	1	0	0	1	2	1	6	1	0	0	0	1	1	7.8	1	0	0	0	1.333	2.28571	4.982	0.571429	0.428571	0.285714	0	0.761857	1.33076	FALSE	TRUE	3	2	TRUE	2.06693	0.34919	2.5654	1.17366
637	1	TIF1A_MOUSE	TIF1A_MOUSE		9.6	1051	116658	Transcription intermediary factor 1-alpha OS=Mus musculus GN=Trim24 PE=1 SV=1	9	7	0.778	3	4	0	0	0	2	0	3	4	0	0	0	0	0	3	4	0	0	0	0	0	5.92857	2.28571	0	0.626143	0.428571	0	0	1.32414	FALSE	TRUE	2	1	FALSE	2.21011	0.142857	3.95147	1.81808
1185	1	WDR89_MOUSE	WDR89_MOUSE		11.1	386	42471	WD repeat-containing protein 89 OS=Mus musculus GN=Wdr89 PE=2 SV=1	6	6	1	0	1	0	0	0	3	2	0	1	0	0	0	3	2	0	1	0	0	0	3	2	1.19643	0.571429	0.285714	2.28571	1.35714	2.41171	1.14286	1.32157	FALSE	TRUE	1	2	TRUE	1.08482	1.63724	-0.593807	-0.333512
737	1	TAF1_MOUSE	TAF1_MOUSE		6.8	1891	214420	Transcription initiation factor TFIID subunit 1 OS=Mus musculus GN=Taf1 PE=2 SV=2	12	12	1	0	4	2	0	0	2	4	0	4	2	0	0	2	4	0	4	2	0	0	2	4	0.571429	2.28571	1.19043	0.857143	0.642857	1.35714	2.33929	1.32057	FALSE	TRUE	2	2	TRUE	1.22618	1.44643	-0.238326	-0.44878
1129	1	1433B_MOUSE	1433B_MOUSE		23.6	246	28087	14-3-3 protein beta/alpha OS=Mus musculus GN=Ywhab PE=1 SV=3	37	6	0.162	6	6	6	5	2	6	6	0	0	3	0	0	0	3	0	0	3.429	0	0	0	3.651	1.14286	0	2.347	1.97957	1.19043	0.285714	2.23586	1.31163	FALSE	FALSE	4	3	TRUE	1.36736	1.23733	0.144156	-0.220298
1013	1	CXXC5_MOUSE	CXXC5_MOUSE		12.6	317	32813	CXXC-type zinc finger protein 5 OS=Mus musculus GN=Cxxc5 PE=2 SV=1	5	5	1	1	2	1	0	1	0	0	1	2	1	0	1	0	0	1	2	1	0	1	0	0	2.85714	1.03571	0.857143	1.42857	2.85714	0.142857	0	1.31122	FALSE	TRUE	3	1	TRUE	1.54464	1	0.627273	-0.016028
776	1	KRR1_MOUSE	KRR1_MOUSE		18.9	380	43539	KRR1 small subunit processome component homolog OS=Mus musculus GN=Krr1 PE=2 SV=1	11	11	1	0	2	3	0	0	4	2	0	2	3	0	0	4	2	0	2	3	0	0	4	2	0.657143	0.877571	2.17457	0.864571	0.714286	2.85714	1	1.30647	FALSE	TRUE	2	2	TRUE	1.14346	1.52381	-0.414271	-0.892551
1096	1	YAF2_MOUSE	YAF2_MOUSE		34.1	179	19656	YY1-associated factor 2 OS=Mus musculus GN=Yaf2 PE=1 SV=1	6	6	1	1	1	1	0	0	1	2	1	1	1	0	0	1	2	1	1	1	0	0	1	2	2.85714	0.428571	0.857143	1.78571	1.14286	0.857143	1.14286	1.29592	FALSE	TRUE	3	2	TRUE	1.48214	1.04762	0.50057	-0.114161
961	1	GYS2_MOUSE	GYS2_MOUSE		6.5	704	80886	Glycogen [starch] synthase, liver OS=Mus musculus GN=Gys2 PE=1 SV=1	5	5	1	0	1	3	1	0	0	0	0	1	3	1	0	0	0	0	1	3	1	0	0	0	0.859143	0.428571	2.28571	4.57143	0.897571	0	0	1.29178	FALSE	TRUE	3	0	TRUE	2.03621	0.29919	2.76675	1.60291
350	1	RAB10_MOUSE	RAB10_MOUSE		16.5	200	22542	Ras-related protein Rab-10 OS=Mus musculus GN=Rab10 PE=1 SV=1	43	7	0.163	4	9	8	2	2	10	8	0	1	2	0	0	1	3	0	2.333	4	0	0	1.9	6.75	0	1.19043	2.61571	0	0	1.12857	4.08329	1.28829	FALSE	FALSE	4	3	TRUE	0.951536	1.73729	-0.868505	-0.911263
599	1	DD19A_MOUSE	DD19A_MOUSE		11.3	478	53890	ATP-dependent RNA helicase DDX19A OS=Mus musculus GN=Ddx19a PE=1 SV=1	8	8	1	1	1	2	0	1	3	0	1	1	2	0	1	3	0	1	1	2	0	1	3	0	2.28571	0.285714	1.14286	0.571429	2.43871	2.28571	0	1.28716	FALSE	TRUE	3	2	TRUE	1.07143	1.57481	-0.555642	-0.682388
253	1	APOC3_MOUSE	APOC3_MOUSE		38.4	99	10983	Apolipoprotein C-III OS=Mus musculus GN=Apoc3 PE=2 SV=2	5	5	1	0	2	0	2	1	0	0	0	2	0	2	1	0	0	0	2	0	2	1	0	0	0	0.760429	0	5.92857	2.28571	0	0	1.2821	FALSE	TRUE	2	1	FALSE	1.67225	0.761905	1.13411	0.554258
1267	1	SALL1_MOUSE	SALL1_MOUSE		2.9	1322	140231	Sal-like protein 1 OS=Mus musculus GN=Sall1 PE=1 SV=1	5	5	1	0	4	0	0	0	0	1	0	4	0	0	0	0	1	0	4	0	0	0	0	1	1.42857	2.39629	0.285714	2.42857	1.42857	0.285714	0.714286	1.2811	FALSE	TRUE	1	1	FALSE	1.63479	0.809524	1.01396	0.74347
1324	1	NDRG2_MOUSE	NDRG2_MOUSE		9.7	371	40790	Protein NDRG2 OS=Mus musculus GN=Ndrg2 PE=1 SV=1	4	4	1	0	0	2	0	0	0	2	0	0	2	0	0	0	2	0	0	2	0	0	0	2	1.42857	0	1.42857	2.85714	1.57143	0.428571	1.24229	1.27951	FALSE	TRUE	1	1	FALSE	1.42857	1.08076	0.402524	0.308522
1362	1	PSD13_MOUSE	PSD13_MOUSE		9.6	376	42810	26S proteasome non-ATPase regulatory subunit 13 OS=Mus musculus GN=Psmd13 PE=1 SV=1	3	3	1	0	2	1	0	0	0	0	0	2	1	0	0	0	0	0	2	1	0	0	0	0	1.57143	1.14286	0.857143	2.85714	1.93757	0.428571	0.142857	1.2768	FALSE	TRUE	2	0	FALSE	1.60714	0.836333	0.942348	0.644711
702	1	INO80_MOUSE	INO80_MOUSE		7.6	1559	176521	Putative DNA helicase INO80 complex homolog 1 OS=Mus musculus GN=Ino80 PE=2 SV=2	10	10	1	1	2	1	0	0	3	3	1	2	1	0	0	3	3	1	2	1	0	0	3	3	2.32	0.857143	0.595286	0.857143	0.571429	2.28571	1.42857	1.27361	FALSE	TRUE	3	2	TRUE	1.15739	1.42857	-0.303695	-0.18688
1059	1	STEA4_MOUSE	STEA4_MOUSE		8.9	470	52995	Metalloreductase STEAP4 OS=Mus musculus GN=Steap4 PE=2 SV=1	7	7	1	0	0	3	0	0	1	3	0	0	3	0	0	1	3	0	0	3	0	0	1	3	1.12857	0	2.28571	1.57143	1.14286	0.857143	1.85714	1.26327	FALSE	TRUE	1	2	TRUE	1.24643	1.28571	-0.0447699	-0.00144516
582	1	NCOA2_MOUSE	NCOA2_MOUSE		5.1	1462	158513	Nuclear receptor coactivator 2 OS=Mus musculus GN=Ncoa2 PE=1 SV=2	7	7	1	2	1	0	0	1	0	3	2	1	0	0	1	0	3	2	1	0	0	1	0	3	4.08329	0.285714	0	0.571429	2.42857	0	1.42857	1.2568	FALSE	TRUE	2	2	TRUE	1.23511	1.28571	-0.0579339	-0.0644248
364	1	PRS8_MOUSE	PRS8_MOUSE		18.5	406	45627	26S protease regulatory subunit 8 OS=Mus musculus GN=Psmc5 PE=1 SV=1	12	12	1	1	5	4	0	0	1	1	1	5	4	0	0	1	1	1	5	4	0	0	1	1	2.17143	2.85714	2.66886	0	0	0.642857	0.428571	1.25269	FALSE	TRUE	3	2	TRUE	1.92436	0.357143	2.4298	1.42825
42	1	OBSCN_MOUSE	OBSCN_MOUSE		0.6	8891	966373	Obscurin OS=Mus musculus GN=Obscn PE=2 SV=2	11	11	1	0	2	1	0	2	4	2	0	2	1	0	2	4	2	0	2	1	0	2	4	2	0	0.714286	0.428571	0	3.85714	2.84614	0.857143	1.24333	FALSE	TRUE	2	3	TRUE	0.285714	2.52014	-3.14086	-1.84508
258	1	FOXA1_MOUSE	FOXA1_MOUSE		19.4	468	48855	Hepatocyte nuclear factor 3-alpha OS=Mus musculus GN=Foxa1 PE=1 SV=2	15	11	0.733	0	2	6	0	0	1	6	0	2	5	0	0	1	3	0	2	5.833	0	0	1	6	0	0.761857	4.08329	0	0	0.571429	3.28571	1.24318	FALSE	TRUE	2	2	TRUE	1.21129	1.28571	-0.0860309	0.112291
954	1	HEXI1_MOUSE	HEXI1_MOUSE		17.4	356	40244	Protein HEXIM1 OS=Mus musculus GN=Hexim1 PE=1 SV=1	9	9	1	0	1	1	0	0	2	5	0	1	1	0	0	2	5	0	1	1	0	0	2	5	0.857143	0.428571	0.760429	1.381	0.892857	1.42857	2.85714	1.22939	FALSE	TRUE	2	2	TRUE	0.856786	1.72619	-1.01059	-0.482682
1246	1	KC1D_MOUSE	KC1D_MOUSE		8.9	415	47317	Casein kinase I isoform delta OS=Mus musculus GN=Csnk1d PE=1 SV=2	5	5	1	0	0	0	0	0	0	5	0	0	0	0	0	0	5	0	0	0	0	0	0	5	1.4	0	0.285714	2.347	1.42857	0.285714	2.85714	1.22916	FALSE	TRUE	0	1	FALSE	1.00818	1.52381	-0.595931	-0.229607
56	1	UBP36_MOUSE	UBP36_MOUSE		9.9	1098	119914	Ubiquitin carboxyl-terminal hydrolase 36 OS=Mus musculus GN=Usp36 PE=2 SV=1	11	11	1	0	1	1	0	2	3	4	0	1	1	0	2	3	4	0	1	1	0	2	3	4	0	0.142857	0.428571	0	3.85714	1.85714	2.28571	1.22449	FALSE	TRUE	2	3	TRUE	0.142857	2.66667	-4.22239	-2.29701
903	1	RPA49_MOUSE	RPA49_MOUSE		11.6	482	54035	DNA-directed RNA polymerase I subunit RPA49 OS=Mus musculus GN=Polr1e PE=1 SV=2	5	5	1	1	0	2	0	1	0	1	1	0	2	0	1	0	1	1	0	2	0	1	0	1	2.66886	0	1.30686	1.14286	2.85714	0	0.571429	1.22102	FALSE	TRUE	2	2	TRUE	1.27964	1.14286	0.163096	0.222779
475	1	SC23A_MOUSE	SC23A_MOUSE		2.7	765	86163	Protein transport protein Sec23A OS=Mus musculus GN=Sec23a PE=1 SV=2	6	6	1	1	1	0	1	0	3	0	1	1	0	1	0	3	0	1	1	0	1	0	3	0	2.28571	0.285714	0	3.75	0	2.21429	0	1.21939	FALSE	TRUE	3	1	TRUE	1.58036	0.738095	1.09837	0.779419
440	1	TP53B_MOUSE	TP53B_MOUSE		5.1	1957	211341	Tumor suppressor p53-binding protein 1 OS=Mus musculus GN=Tp53bp1 PE=1 SV=2	8	8	1	3	3	2	0	0	0	0	3	3	2	0	0	0	0	3	3	2	0	0	0	0	5.64871	1.42857	1.14286	0.285714	0	0	0	1.21512	FALSE	TRUE	3	0	TRUE	2.12646	0		0.180341
1303	1	ADRM1_MOUSE	ADRM1_MOUSE		6.1	407	42061	Proteasomal ubiquitin receptor ADRM1 OS=Mus musculus GN=Adrm1 PE=1 SV=2	3	3	1	0	0	3	0	0	0	0	0	0	3	0	0	0	0	0	0	3	0	0	0	0	1.42857	0	2.28571	2.85714	1.46943	0.428571	0	1.20992	FALSE	TRUE	1	0	FALSE	1.64286	0.632667	1.37669	0.81167
777	1	CG026_MOUSE	CG026_MOUSE		9.6	448	49909	Uncharacterized protein C7orf26 homolog OS=Mus musculus PE=2 SV=1	8	8	1	1	2	3	0	0	2	0	1	2	3	0	0	2	0	1	2	3	0	0	2	0	2.37143	0.881	2.18186	0.868143	0.714286	1.42857	0	1.20647	FALSE	TRUE	3	1	TRUE	1.57561	0.714286	1.14133	0.68757
756	1	MED23_MOUSE	MED23_MOUSE		3.4	1367	156088	Mediator of RNA polymerase II transcription subunit 23 OS=Mus musculus GN=Med23 PE=1 SV=2	8	8	1	0	1	0	0	1	4	2	0	1	0	0	1	4	2	0	1	0	0	1	4	2	0.572857	0.285714	0	0.857143	2.85714	2.85714	1	1.20429	FALSE	TRUE	1	3	TRUE	0.428929	2.2381	-2.38346	-1.10923
280	1	ALDH2_MOUSE	ALDH2_MOUSE		20.4	519	56539	Aldehyde dehydrogenase, mitochondrial OS=Mus musculus GN=Aldh2 PE=1 SV=1	14	14	1	0	2	1	0	0	4	7	0	2	1	0	0	4	7	0	2	1	0	0	4	7	0	0.857143	0.428571	0	0	2.85714	4.14286	1.18367	FALSE	TRUE	2	2	TRUE	0.321429	2.33333	-2.85982	-1.55493
799	1	KC1A_MOUSE	KC1A_MOUSE		13.4	337	38916	Casein kinase I isoform alpha OS=Mus musculus GN=Csnk1a1 PE=2 SV=2	9	9	1	0	6	2	0	0	0	1	0	6	2	0	0	0	1	0	6	2	0	0	0	1	0.714286	4.08329	1.24229	0.9	0.760429	0	0.571429	1.18167	FALSE	TRUE	2	1	FALSE	1.73496	0.443952	1.96643	1.18844
567	1	MYL6_MOUSE	MYL6_MOUSE		15.9	151	16931	Myosin light polypeptide 6 OS=Mus musculus GN=Myl6 PE=1 SV=3	8	8	1	0	2	0	1	0	2	3	0	2	0	1	0	2	3	0	2	0	1	0	2	3	0.285714	0.857143	0	4.02429	0.428571	1.24229	1.42857	1.18094	FALSE	TRUE	2	2	TRUE	1.29179	1.03314	0.322327	0.213367
569	1	NR1H2_MOUSE	NR1H2_MOUSE		6.5	446	49721	Oxysterols receptor LXR-beta OS=Mus musculus GN=Nr1h2 PE=2 SV=1	12	12	1	0	4	3	0	0	2	3	0	4	3	0	0	2	3	0	4	3	0	0	2	3	0.285714	2.28571	1.91157	0.571429	0.428571	1.28571	1.42857	1.17104	FALSE	TRUE	2	2	TRUE	1.26361	1.04762	0.270434	0.169921
720	1	RPA43_MOUSE	RPA43_MOUSE		10	330	36722	DNA-directed RNA polymerase I subunit RPA43 OS=Mus musculus GN=Twistnb PE=1 SV=1	6	6	1	0	0	1	1	0	1	3	0	0	1	1	0	1	3	0	0	1	1	0	1	3	0.571429	0	0.642857	4.14286	0.595286	0.771429	1.46943	1.17047	FALSE	TRUE	2	2	TRUE	1.33929	0.945381	0.502496	0.207604
1174	1	BR44_MOUSE	BR44_MOUSE		18.1	127	14287	Brain protein 44 OS=Mus musculus GN=Brp44 PE=1 SV=1	5	5	1	0	3	0	0	0	1	1	0	3	0	0	0	1	1	0	3	0	0	0	1	1	1.15014	1.57143	0.285714	2.28571	1.32143	0.881	0.642857	1.16261	FALSE	TRUE	1	2	TRUE	1.32325	0.948429	0.480475	0.0893842
747	1	COEA1_MOUSE	COEA1_MOUSE		2.2	1797	193014	Collagen alpha-1(XIV) chain OS=Mus musculus GN=Col14a1 PE=2 SV=2	8	8	1	0	1	1	0	1	2	3	0	1	1	0	1	2	3	0	1	1	0	1	2	3	0.571429	0.285714	0.657143	0.857143	2.85714	1.366	1.5	1.15637	FALSE	TRUE	2	3	TRUE	0.592857	1.90771	-1.68609	-1.29605
764	1	XYLT1_MOUSE	XYLT1_MOUSE		2.5	953	107299	Xylosyltransferase 1 OS=Mus musculus GN=Xylt1 PE=2 SV=1	2	2	1	0	0	0	2	0	0	0	0	0	0	2	0	0	0	0	0	0	2	0	0	0	0.642857	0	0	6.68943	0.714286	0	0	1.14951	FALSE	TRUE	1	0	FALSE	1.83307	0.238095	2.94465	1.73734
957	1	ZMY11_MOUSE	ZMY11_MOUSE		7.7	562	66152	Zinc finger MYND domain-containing protein 11 OS=Mus musculus GN=Zmynd11 PE=2 SV=1	7	7	1	0	0	3	0	0	1	3	0	0	3	0	0	1	3	0	0	3	0	0	1	3	0.857143	0	2.28571	1.38657	0.895429	0.857143	1.75	1.14743	FALSE	TRUE	1	2	TRUE	1.13236	1.16752	-0.0441229	-0.220477
369	1	RS23_MOUSE	RS23_MOUSE		26.6	143	15809	40S ribosomal protein S23 OS=Mus musculus GN=Rps23 PE=2 SV=3	14	14	1	0	3	2	0	0	3	6	0	3	2	0	0	3	6	0	3	2	0	0	3	6	0	1.42857	1.14286	0	0	2.16886	3.29043	1.14724	FALSE	TRUE	2	2	TRUE	0.642857	1.81976	-1.50118	-1.05358
935	1	L10K_MOUSE	L10K_MOUSE		17	94	10198	Leydig cell tumor 10 kDa protein homolog OS=Mus musculus GN=D8Ertd738e PE=2 SV=1	8	8	1	0	3	1	0	0	3	1	0	3	1	0	0	3	1	0	3	1	0	0	3	1	0.857143	1.42857	0.724857	1.28571	0.864571	2.28571	0.571429	1.14543	FALSE	TRUE	2	2	TRUE	1.07407	1.24057	-0.207915	-0.272858
1065	1	SMC6_MOUSE	SMC6_MOUSE		2.9	1097	127199	Structural maintenance of chromosomes protein 6 OS=Mus musculus GN=Smc6 PE=2 SV=1	3	3	1	2	1	0	0	0	0	0	2	1	0	0	0	0	0	2	1	0	0	0	0	0	4.57143	0.428571	0	1.57143	1.14286	0.285714	0	1.14286	FALSE	TRUE	2	0	FALSE	1.64286	0.47619	1.7866	1.05065
1241	1	M2GD_MOUSE	M2GD_MOUSE		2.1	869	97256	Dimethylglycine dehydrogenase, mitochondrial OS=Mus musculus GN=Dmgdh PE=1 SV=1	4	4	1	0	0	2	0	0	0	2	0	0	2	0	0	0	2	0	0	2	0	0	0	2	1.366	0	1.42857	2.33714	1.42857	0.285714	1.14286	1.14127	FALSE	TRUE	1	1	FALSE	1.28293	0.952381	0.42983	0.131723
1215	1	MED11_MOUSE	MED11_MOUSE		31.6	117	13132	Mediator of RNA polymerase II transcription subunit 11 OS=Mus musculus GN=Med11 PE=2 SV=1	4	4	1	0	1	0	0	0	2	1	0	1	0	0	0	2	1	0	1	0	0	0	2	1	1.28571	0.571429	0.285714	2.28571	1.42857	1.46943	0.657143	1.14053	FALSE	TRUE	1	2	TRUE	1.10714	1.18505	-0.0981036	-0.339905
944	1	ADAP2_MOUSE	ADAP2_MOUSE		9.4	381	43990	Arf-GAP with dual PH domain-containing protein 2 OS=Mus musculus GN=Adap2 PE=2 SV=1	8	8	1	0	3	2	0	0	2	1	0	3	2	0	0	2	1	0	3	2	0	0	2	1	0.857143	1.42857	1.35714	1.35614	0.892286	1.42857	0.571429	1.12733	FALSE	TRUE	2	2	TRUE	1.24975	0.964095	0.374392	0.0202415
529	1	IQGA2_MOUSE	IQGA2_MOUSE		7	1575	180529	Ras GTPase-activating-like protein IQGAP2 OS=Mus musculus GN=Iqgap2 PE=1 SV=2	9	9	1	1	6	1	0	0	0	1	1	6	1	0	0	0	1	1	6	1	0	0	0	1	2.28571	3.85714	0.571429	0.428571	0.285714	0	0.428571	1.12245	FALSE	TRUE	3	1	TRUE	1.78571	0.238095	2.90689	1.75605
858	1	LENG8_MOUSE	LENG8_MOUSE		10.6	785	86768	Leukocyte receptor cluster member 8 homolog OS=Mus musculus GN=Leng8 PE=1 SV=1	8	8	1	0	4	2	0	0	2	0	0	4	2	0	0	2	0	0	4	2	0	0	2	0	0.857143	2.28571	1.28571	1.14286	0.857143	1.42857	0	1.12245	FALSE	TRUE	2	1	FALSE	1.39286	0.761905	0.870365	0.438556
158	1	PDIA4_MOUSE	PDIA4_MOUSE		10.8	638	71974	Protein disulfide-isomerase A4 OS=Mus musculus GN=Pdia4 PE=1 SV=2	7	7	1	2	0	1	0	1	2	1	2	0	1	0	1	2	1	2	0	1	0	1	2	1	3.71229	0	0.428571	0	2.28571	1.14286	0.285714	1.12216	FALSE	TRUE	2	3	TRUE	1.03521	1.2381	-0.258193	-0.383319
1089	1	DHRS4_MOUSE	DHRS4_MOUSE		8.5	260	27755	Dehydrogenase/reductase SDR family member 4 OS=Mus musculus GN=Dhrs4 PE=2 SV=1	6	6	1	0	3	2	0	0	1	0	0	3	2	0	0	1	0	0	3	2	0	0	1	0	1.14286	1.48571	1.42857	1.75	1.14286	0.857143	0	1.11531	FALSE	TRUE	2	1	FALSE	1.45179	0.666667	1.12279	0.713976
511	1	SOSSC_MOUSE	SOSSC_MOUSE		31.7	104	11412	SOSS complex subunit C OS=Mus musculus GN=Ssbip1 PE=2 SV=1	11	11	1	0	1	2	0	0	5	3	0	1	2	0	0	5	3	0	1	2	0	0	5	3	0.285714	0.285714	1.14286	0.428571	0.285714	3.91671	1.42857	1.11055	FALSE	TRUE	2	2	TRUE	0.535714	1.877	-1.80889	-1.13594
559	1	MED13_MOUSE	MED13_MOUSE		3.5	2171	238592	Mediator of RNA polymerase II transcription subunit 13 OS=Mus musculus GN=Med13 PE=2 SV=1	10	10	1	0	2	2	0	1	2	3	0	2	2	0	1	2	3	0	2	2	0	1	2	3	0.285714	0.857143	1.14286	0.428571	2.39629	1.22443	1.42857	1.10908	FALSE	TRUE	2	3	TRUE	0.678571	1.6831	-1.31054	-0.939659
1325	1	DNJC7_MOUSE	DNJC7_MOUSE		5.3	494	56477	DnaJ homolog subfamily C member 7 OS=Mus musculus GN=Dnajc7 PE=1 SV=2	2	2	1	0	0	2	0	0	0	0	0	0	2	0	0	0	0	0	0	2	0	0	0	0	1.42857	0	1.42857	2.85714	1.579	0.428571	0	1.10312	FALSE	TRUE	1	0	FALSE	1.42857	0.66919	1.09408	0.46623
1042	1	TRFE_MOUSE	TRFE_MOUSE		8	697	76725	Serotransferrin OS=Mus musculus GN=Tf PE=1 SV=1	4	4	1	0	0	1	0	1	2	0	0	0	1	0	1	2	0	0	0	1	0	1	2	0	1.01857	0	0.857143	1.48571	2.85714	1.42857	0	1.09245	FALSE	TRUE	1	2	TRUE	0.840357	1.42857	-0.765499	-0.490518
700	1	UBE2O_MOUSE	UBE2O_MOUSE		2.6	1288	140819	Ubiquitin-conjugating enzyme E2 O OS=Mus musculus GN=Ube2o PE=1 SV=2	2	2	1	0	0	0	2	0	0	0	0	0	0	2	0	0	0	0	0	0	2	0	0	0	0.571429	0	0	6.44671	0.571429	0	0	1.08422	FALSE	TRUE	1	0	FALSE	1.75454	0.190476	3.20341	1.69082
501	1	STT3B_MOUSE	STT3B_MOUSE		2.8	823	93247	Dolichyl-diphosphooligosaccharide--protein glycosyltransferase subunit STT3B OS=Mus musculus GN=Stt3b PE=1 SV=2	12	12	1	0	2	3	0	0	2	5	0	2	3	0	0	2	5	0	2	3	0	0	2	5	0.285714	0.857143	1.85714	0.285714	0.285714	1.14886	2.85714	1.08249	FALSE	TRUE	2	2	TRUE	0.821429	1.43057	-0.800384	-0.47324
522	1	CF153_MOUSE	CF153_MOUSE		9.8	244	28590	UPF0399 protein C6orf153 homolog OS=Mus musculus PE=2 SV=1	9	9	1	1	2	0	0	0	4	2	1	2	0	0	0	4	2	1	2	0	0	0	4	2	2.28571	0.857143	0	0.428571	0.285714	2.85714	0.859143	1.08192	FALSE	TRUE	2	2	TRUE	0.892857	1.334	-0.579257	-0.37336
479	1	S30BP_MOUSE	S30BP_MOUSE		16.6	308	33833	SAP30-binding protein OS=Mus musculus GN=Sap30bp PE=2 SV=2	12	12	1	0	2	2	0	0	4	4	0	2	2	0	0	4	4	0	2	2	0	0	4	4	0	0.857143	1.14286	0.285714	0.142857	2.85714	2.28571	1.08163	FALSE	TRUE	2	2	TRUE	0.571429	1.7619	-1.62449	-0.906857
1177	1	T2EA_MOUSE	T2EA_MOUSE		5.5	440	49594	General transcription factor IIE subunit 1 OS=Mus musculus GN=Gtf2e1 PE=2 SV=1	4	4	1	0	3	0	0	0	1	0	0	3	0	0	0	1	0	0	3	0	0	0	1	0	1.17	1.57143	0.285714	2.28571	1.35614	0.892286	0	1.08018	FALSE	TRUE	1	1	FALSE	1.32821	0.749476	0.825533	0.505685
612	1	DDX3Y_MOUSE	DDX3Y_MOUSE		31	658	73429	ATP-dependent RNA helicase DDX3Y OS=Mus musculus GN=Ddx3y PE=1 SV=2	712	1	0.001	123	93	104	101	120	96	75	0	0	0	0	0	1	0	0	0	0	0	0	7.508	0	0.428571	0	0	0.571429	0.428571	6.07257	0	1.07159	FALSE	FALSE	4	3	TRUE	0.25	2.16705	-3.11573	-1.73403
198	1	ZFX_MOUSE	ZFX_MOUSE		12	799	90027	Zinc finger X-chromosomal protein OS=Mus musculus GN=Zfx PE=1 SV=2	9	9	1	0	5	2	1	0	0	1	0	5	2	1	0	0	1	0	5	2	1	0	0	1	0	2.85714	1.05957	3.29043	0	0	0.285714	1.07041	FALSE	TRUE	3	1	TRUE	1.80179	0.0952381	4.24174	2.52497
942	1	TF3C5_MOUSE	TF3C5_MOUSE		6.2	520	60503	General transcription factor 3C polypeptide 5 OS=Mus musculus GN=Gtf3c5 PE=2 SV=2	5	5	1	1	2	0	0	0	1	1	1	2	0	0	0	1	1	1	2	0	0	0	1	1	2.85714	1	0	1.32143	0.881	0.857143	0.571429	1.06973	FALSE	TRUE	2	2	TRUE	1.29464	0.769857	0.749892	0.437586
794	1	TYDP1_MOUSE	TYDP1_MOUSE		12.5	609	68690	Tyrosyl-DNA phosphodiesterase 1 OS=Mus musculus GN=Tdp1 PE=2 SV=2	6	6	1	0	0	0	0	1	2	3	0	0	0	0	1	2	3	0	0	0	0	1	2	3	0.714286	0	0	0.895429	2.85714	1.42857	1.57143	1.06669	FALSE	TRUE	0	3	TRUE	0.402429	1.95238	-2.27843	-1.31669
748	1	CE024_MOUSE	CE024_MOUSE		28.2	188	20140	UPF0461 protein C5orf24 homolog OS=Mus musculus PE=1 SV=1	9	9	1	0	2	2	0	0	1	4	0	2	2	0	0	1	4	0	2	2	0	0	1	4	0.571429	0.857143	1.19043	0.857143	0.714286	0.857143	2.347	1.05637	FALSE	TRUE	2	2	TRUE	0.869036	1.30614	-0.587825	-0.349935
1221	1	SPCS1_MOUSE	SPCS1_MOUSE		27.5	102	11778	Signal peptidase complex subunit 1 OS=Mus musculus GN=Spcs1 PE=2 SV=2	3	3	1	0	2	0	0	0	0	1	0	2	0	0	0	0	1	0	2	0	0	0	0	1	1.30614	1.14286	0.285714	2.28571	1.42857	0.285714	0.657143	1.05598	FALSE	TRUE	1	1	FALSE	1.25511	0.790476	0.667017	0.280309
246	1	NKTR_MOUSE	NKTR_MOUSE		6.2	1453	163441	NK-tumor recognition protein OS=Mus musculus GN=Nktr PE=1 SV=3	11	11	1	0	3	2	0	1	2	3	0	3	2	0	1	2	3	0	3	2	0	1	2	3	0	1.38657	1.07143	0	2.28571	1.14286	1.42857	1.04502	FALSE	TRUE	2	3	TRUE	0.6145	1.61905	-1.39766	-0.851696
1223	1	WDR83_MOUSE	WDR83_MOUSE		13	315	34445	WD repeat domain-containing protein 83 OS=Mus musculus GN=Wdr83 PE=1 SV=1	3	3	1	0	2	1	0	0	0	0	0	2	1	0	0	0	0	0	2	1	0	0	0	0	1.30686	1.14286	0.857143	2.28571	1.42857	0.285714	0	1.04384	FALSE	TRUE	2	0	FALSE	1.39814	0.571429	1.29087	0.620529
1123	1	MED30_MOUSE	MED30_MOUSE		11.8	178	20359	Mediator of RNA polymerase II transcription subunit 30 OS=Mus musculus GN=Med30 PE=1 SV=1	4	4	1	0	1	0	0	0	3	0	0	1	0	0	0	3	0	0	1	0	0	0	3	0	1.14286	0.571429	0.142857	1.93757	1.14886	2.35714	0	1.04296	FALSE	TRUE	1	1	FALSE	0.948679	1.16867	-0.300872	-0.303357
1383	1	K1C16_MOUSE	K1C16_MOUSE		4.9	469	51607	Keratin, type I cytoskeletal 16 OS=Mus musculus GN=Krt16 PE=1 SV=3	30	0	0	6	8	7	1	5	3	0	0	0	0	0	0	0	0	0	0	0	0	0	0	0	1.57143	0	0.285714	2.85714	2	0.428571	0.142857	1.04082	FALSE	FALSE	4	2	TRUE	1.17857	0.857143	0.459432	0.0838142
884	1	C19L1_MOUSE	C19L1_MOUSE		3.9	537	60252	CWF19-like protein 1 OS=Mus musculus GN=Cwf19l1 PE=2 SV=1	7	7	1	0	1	1	0	0	1	4	0	1	1	0	0	1	4	0	1	1	0	0	1	4	0.857143	0.428571	0.714286	1.14286	0.857143	0.857143	2.36729	1.03206	FALSE	TRUE	2	2	TRUE	0.785714	1.36052	-0.792086	-0.630558
234	1	MAP4_MOUSE	MAP4_MOUSE		3.8	1125	117430	Microtubule-associated protein 4 OS=Mus musculus GN=Map4 PE=1 SV=3	5	5	1	1	0	0	0	2	2	0	1	0	0	0	2	2	0	1	0	0	0	2	2	0	1.93757	0	0	0	4.14286	1.14286	0	1.0319	FALSE	TRUE	1	2	TRUE	0.484393	1.7619	-1.86289	-1.54461
733	1	SUZ12_MOUSE	SUZ12_MOUSE		13	741	83027	Polycomb protein Suz12 OS=Mus musculus GN=Suz12 PE=1 SV=2	7	7	1	1	4	1	0	0	0	1	1	4	1	0	0	0	1	1	4	1	0	0	0	1	2.347	2.28571	0.642857	0.857143	0.642857	0	0.428571	1.02916	FALSE	TRUE	3	1	TRUE	1.53318	0.357143	2.10195	1.21702
743	1	TNC18_MOUSE	TNC18_MOUSE		1.3	2878	307636	Trinucleotide repeat-containing gene 18 protein OS=Mus musculus GN=Tnrc18 PE=1 SV=2	4	4	1	2	0	1	0	0	1	0	2	0	1	0	0	1	0	2	0	1	0	0	1	0	4.14286	0	0.642857	0.857143	0.657143	0.857143	0	1.02245	FALSE	TRUE	2	1	FALSE	1.41071	0.504762	1.48275	0.796487
833	1	CHD9_MOUSE	CHD9_MOUSE		3.4	2885	323861	Chromodomain-helicase-DNA-binding protein 9 OS=Mus musculus GN=Chd9 PE=1 SV=2	25	4	0.16	2	9	5	2	0	3	4	0	1	1	0	0	1	1	0	2.19	1.534	0	0	2.053	1.323	0.771429	1.17	0.933429	1.05957	0.857143	1.579	0.760429	1.01871	FALSE	FALSE	4	2	TRUE	0.983607	1.06552	-0.115409	-0.509739
1050	1	C1TC_MOUSE	C1TC_MOUSE		4.8	935	101257	C-1-tetrahydrofolate synthase, cytoplasmic OS=Mus musculus GN=Mthfd1 PE=1 SV=3	5	5	1	0	4	1	0	0	0	0	0	4	1	0	0	0	0	0	4	1	0	0	0	0	1.05957	2.33329	0.857143	1.50743	1.14286	0.142857	0	1.00616	FALSE	TRUE	2	0	FALSE	1.43936	0.428571	1.74782	0.914404
870	1	TMM56_MOUSE	TMM56_MOUSE		7.2	276	31237	Transmembrane protein 56 OS=Mus musculus GN=Tmem56 PE=2 SV=1	7	7	1	0	3	2	0	0	1	1	0	3	2	0	0	1	1	0	3	2	0	0	1	1	0.857143	1.42857	1.28571	1.14286	0.857143	0.857143	0.571429	1	FALSE	TRUE	2	2	TRUE	1.17857	0.761905	0.629357	0.0250436
47	1	CHD7_MOUSE	CHD7_MOUSE		3	2986	334062	Chromodomain-helicase-DNA-binding protein 7 OS=Mus musculus GN=Chd7 PE=2 SV=1	25	4	0.16	4	8	5	2	0	2	4	2	0	1	0	0	0	1	3	0	1.534	0	0	0	1.323	5.28914	0	0.933429	0	0	0	0.760429	0.997571	FALSE	FALSE	4	2	TRUE	1.55564	0.253476	2.61759	1.28256
1263	1	YIPF5_MOUSE	YIPF5_MOUSE		8.2	257	27874	Protein YIPF5 OS=Mus musculus GN=Yipf5 PE=2 SV=1	2	2	1	0	0	0	0	0	0	2	0	0	0	0	0	0	2	0	0	0	0	0	0	2	1.42857	0	0.285714	2.39629	1.42857	0.285714	1.15014	0.996429	FALSE	TRUE	0	1	FALSE	1.02764	0.95481	0.106054	-0.430903
694	1	RB15B_MOUSE	RB15B_MOUSE		4.2	887	97077	Putative RNA-binding protein 15B OS=Mus musculus GN=Rbm15b PE=1 SV=2	9	9	1	0	2	3	0	0	1	3	0	2	3	0	0	1	3	0	2	3	0	0	1	3	0.571429	0.857143	2	0.761857	0.571429	0.761857	1.42857	0.993184	FALSE	TRUE	2	2	TRUE	1.04761	0.920619	0.186422	-0.419365
1240	1	TMM43_MOUSE	TMM43_MOUSE		10	400	44784	Transmembrane protein 43 OS=Mus musculus GN=Tmem43 PE=1 SV=1	2	2	1	0	0	0	0	0	2	0	0	0	0	0	0	2	0	0	0	0	0	0	2	0	1.36514	0	0.285714	2.33329	1.42857	1.53571	0	0.992633	FALSE	TRUE	0	1	FALSE	0.996036	0.988095	0.0115474	-0.534305
992	1	SEC63_MOUSE	SEC63_MOUSE		6.2	760	87843	Translocation protein SEC63 homolog OS=Mus musculus GN=Sec63 PE=1 SV=3	5	5	1	0	1	3	0	0	1	0	0	1	3	0	0	1	0	0	1	3	0	0	1	0	0.933286	0.428571	2.28571	1.42857	1	0.857143	0	0.990469	FALSE	TRUE	2	1	FALSE	1.26904	0.619048	1.03561	0.0517621
298	1	DHB8_MOUSE	DHB8_MOUSE		10.4	259	26589	Estradiol 17-beta-dehydrogenase 8 OS=Mus musculus GN=Hsd17b8 PE=1 SV=2	4	4	1	0	1	0	2	0	1	0	0	1	0	2	0	1	0	0	1	0	2	0	1	0	0	0.285714	0	6.04757	0	0.572857	0	0.986592	FALSE	TRUE	2	1	FALSE	1.58332	0.190952	3.05167	1.48048
1195	1	MYST1_MOUSE	MYST1_MOUSE		5	458	52575	Probable histone acetyltransferase MYST1 OS=Mus musculus GN=Myst1 PE=1 SV=1	12	1	0.083	0	3	2	0	0	3	4	0	0	0	0	0	0	1	0	0	0	0	0	0	2.5	1.28571	0	0.285714	2.28571	1.4	0.285714	1.35714	0.985714	FALSE	FALSE	2	2	TRUE	0.964286	1.01429	-0.0729315	-0.803025
765	1	UBIP1_MOUSE	UBIP1_MOUSE		8	540	60213	Upstream-binding protein 1 OS=Mus musculus GN=Ubp1 PE=1 SV=1	8	8	1	0	1	4	0	0	0	3	0	1	4	0	0	0	3	0	1	4	0	0	0	3	0.642857	0.285714	2.85714	0.857143	0.714286	0	1.53571	0.984694	FALSE	TRUE	2	1	FALSE	1.16071	0.75	0.63005	-0.238106
517	1	LMF1_MOUSE	LMF1_MOUSE		8.2	574	65879	Lipase maturation factor 1 OS=Mus musculus GN=Lmf1 PE=2 SV=1	8	8	1	1	2	3	0	0	1	1	1	2	3	0	0	1	1	1	2	3	0	0	1	1	2.28571	0.857143	1.881	0.428571	0.285714	0.714286	0.428571	0.983	FALSE	TRUE	3	2	TRUE	1.36311	0.47619	1.51729	0.407047
695	1	NFRKB_MOUSE	NFRKB_MOUSE		5.6	1296	138765	Nuclear factor related to kappa-B-binding protein OS=Mus musculus GN=Nfrkb PE=2 SV=1	4	4	1	1	0	2	0	1	0	0	1	0	2	0	1	0	0	1	0	2	0	1	0	0	2.28571	0	1.14286	0.771429	2.66886	0	0	0.981265	FALSE	TRUE	2	1	FALSE	1.05	0.889619	0.23913	-0.571253
540	1	CC88B_MOUSE	CC88B_MOUSE		2.4	1481	166609	Coiled-coil domain-containing protein 88B OS=Mus musculus GN=Ccdc88b PE=1 SV=2	2	2	1	0	0	0	2	0	0	0	0	0	0	2	0	0	0	0	0	0	2	0	0	0	0.285714	0	0	6.29386	0.285714	0	0	0.980755	FALSE	TRUE	1	0	FALSE	1.64489	0.0952381	4.11031	2.32245
356	1	SUMO2_MOUSE	SUMO2_MOUSE		23.2	95	10872	Small ubiquitin-related modifier 2 OS=Mus musculus GN=Sumo2 PE=2 SV=1	31	3	0.097	3	4	0	7	6	3	8	0	1	0	0	0	0	2	0	4	0	0	0	0	8	0	2.28571	0	0	0	0	4.57143	0.979592	FALSE	FALSE	3	3	TRUE	0.571429	1.52381	-1.41504	-1.52452
1107	1	TRI33_MOUSE	TRI33_MOUSE		4.3	1142	123844	E3 ubiquitin-protein ligase TRIM33 OS=Mus musculus GN=Trim33 PE=2 SV=2	6	4	0.667	0	1	2	0	0	2	1	0	1	2	0	0	0	1	0	1	2	0	0	0	1	1.14286	0.428571	1.42857	1.85714	1.14286	0.285714	0.571429	0.979592	FALSE	TRUE	2	2	TRUE	1.21429	0.666667	0.86507	0.0879545
1088	1	TDIF1_MOUSE	TDIF1_MOUSE		8.5	328	36853	Deoxynucleotidyltransferase terminal-interacting protein 1 OS=Mus musculus GN=Dnttip1 PE=2 SV=1	4	4	1	0	2	0	0	0	1	1	0	2	0	0	0	1	1	0	2	0	0	0	1	1	1.14286	1.12857	0.142857	1.73586	1.14286	0.857143	0.571429	0.960224	FALSE	TRUE	1	2	TRUE	1.03754	0.857143	0.275553	-0.3505
673	1	P4R3A_MOUSE	P4R3A_MOUSE		8.7	820	93844	Serine/threonine-protein phosphatase 4 regulatory subunit 3A OS=Mus musculus GN=Smek1 PE=1 SV=1	8	8	1	0	5	3	0	0	0	0	0	5	3	0	0	0	0	0	5	3	0	0	0	0	0.571429	2.85714	2	0.714286	0.571429	0	0	0.959184	FALSE	TRUE	2	0	FALSE	1.53571	0.190476	3.01123	1.62415
1210	1	MED8_MOUSE	MED8_MOUSE		13.4	268	29200	Mediator of RNA polymerase II transcription subunit 8 OS=Mus musculus GN=Med8 PE=2 SV=1	2	2	1	0	0	2	0	0	0	0	0	0	2	0	0	0	0	0	0	2	0	0	0	0	1.28571	0	1.42857	2.28571	1.42857	0.285714	0	0.959184	FALSE	TRUE	1	0	FALSE	1.25	0.571429	1.12928	0.334374
771	1	NOL12_MOUSE	NOL12_MOUSE		17.1	217	25357	Nucleolar protein 12 OS=Mus musculus GN=Nol12 PE=2 SV=1	8	8	1	0	2	2	0	0	2	2	0	2	2	0	0	2	2	0	2	2	0	0	2	2	0.642857	0.864571	1.19643	0.857143	0.714286	1.38657	1	0.951694	FALSE	TRUE	2	2	TRUE	0.89025	1.03362	-0.215422	-0.524565
275	1	NR5A2_MOUSE	NR5A2_MOUSE		14.5	560	64021	Nuclear receptor subfamily 5 group A member 2 OS=Mus musculus GN=Nr5a2 PE=1 SV=3	13	10	0.769	0	4	5	0	0	0	4	0	2	4	0	0	0	4	0	2.571	4.571	0	0	0	4	0	1.22443	3.11729	0	0	0	2.28571	0.946776	FALSE	TRUE	2	1	FALSE	1.08543	0.761905	0.510582	-0.00647687
962	1	MED17_MOUSE	MED17_MOUSE		7.7	649	72463	Mediator of RNA polymerase II transcription subunit 17 OS=Mus musculus GN=Med17 PE=1 SV=1	5	5	1	0	0	3	0	0	0	2	0	0	3	0	0	0	2	0	0	3	0	0	0	2	0.864571	0	2.28571	1.42857	0.9	0	1.14286	0.945959	FALSE	TRUE	1	1	FALSE	1.14471	0.680952	0.749362	0.20059
1039	1	EED_MOUSE	EED_MOUSE		8.2	441	50199	Polycomb protein EED OS=Mus musculus GN=Eed PE=1 SV=1	5	5	1	0	3	2	0	0	0	0	0	3	2	0	0	0	0	0	3	2	0	0	0	0	1.00657	1.43871	1.42857	1.46943	1.12857	0.142857	0	0.944959	FALSE	TRUE	2	0	FALSE	1.33582	0.42381	1.65624	0.931976
615	1	TTF1_MOUSE	TTF1_MOUSE		6.9	859	97724	Transcription termination factor 1 OS=Mus musculus GN=Ttf1 PE=1 SV=2	7	7	1	0	2	1	0	1	1	2	0	2	1	0	1	1	2	0	2	1	0	1	1	2	0.428571	0.857143	0.571429	0.571429	2.565	0.724857	0.892857	0.944469	FALSE	TRUE	2	3	TRUE	0.607143	1.39424	-1.19937	-1.10419
883	1	BAG5_MOUSE	BAG5_MOUSE		9.4	447	50944	BAG family molecular chaperone regulator 5 OS=Mus musculus GN=Bag5 PE=1 SV=1	6	6	1	0	1	0	0	0	3	2	0	1	0	0	0	3	2	0	1	0	0	0	3	2	0.857143	0.428571	0	1.14286	0.857143	2.28571	1.00457	0.939429	FALSE	TRUE	1	2	TRUE	0.607143	1.38248	-1.18715	-1.18663
598	1	ZN148_MOUSE	ZN148_MOUSE		7.9	794	88752	Zinc finger protein 148 OS=Mus musculus GN=Znf148 PE=1 SV=2	9	9	1	0	5	1	0	0	1	2	0	5	1	0	0	1	2	0	5	1	0	0	1	2	0.428571	2.85714	0.571429	0.571429	0.428571	0.723857	0.877571	0.922653	FALSE	TRUE	2	2	TRUE	1.10714	0.676667	0.710324	0.317358
999	1	MBOA5_MOUSE	MBOA5_MOUSE		4.5	487	56148	Lysophospholipid acyltransferase 5 OS=Mus musculus GN=Lpcat3 PE=1 SV=1	5	5	1	0	2	1	0	0	0	2	0	2	1	0	0	0	2	0	2	1	0	0	0	2	0.933429	1.00457	0.857143	1.42857	1	0	1.14286	0.90951	FALSE	TRUE	2	1	FALSE	1.05593	0.714286	0.563939	0.218207
1026	1	ATLA3_MOUSE	ATLA3_MOUSE		15.9	541	60576	Atlastin-3 OS=Mus musculus GN=Atl3 PE=2 SV=1	4	4	1	0	0	1	0	0	1	2	0	0	1	0	0	1	2	0	0	1	0	0	1	2	1	0	0.857143	1.42857	1.07143	0.857143	1.14286	0.908163	FALSE	TRUE	1	2	TRUE	0.821429	1.02381	-0.31774	-0.479975
832	1	NKRF_MOUSE	NKRF_MOUSE		3.5	690	77708	NF-kappa-B-repressing factor OS=Mus musculus GN=Nkrf PE=2 SV=2	6	6	1	0	0	1	0	0	2	3	0	0	1	0	0	2	3	0	0	1	0	0	2	3	0.761857	0	0.666714	1.03571	0.857143	1.42857	1.57143	0.903061	FALSE	TRUE	1	2	TRUE	0.616071	1.28571	-1.0614	-1.18937
276	1	CBP_MOUSE	CBP_MOUSE		2.7	2441	265475	CREB-binding protein OS=Mus musculus GN=Crebbp PE=1 SV=2	8	8	1	0	4	2	0	1	1	0	0	4	2	0	1	1	0	0	4	2	0	1	1	0	0	2.28571	1.07143	0	2.28571	0.571429	0	0.887755	FALSE	TRUE	2	2	TRUE	0.839286	0.952381	-0.182377	-0.299249
141	1	LGMN_MOUSE	LGMN_MOUSE		6.7	435	49374	Legumain OS=Mus musculus GN=Lgmn PE=1 SV=1	7	7	1	0	3	3	1	0	0	0	0	3	3	1	0	0	0	0	3	3	1	0	0	0	0	1.35614	1.57143	3.26686	0	0	0	0.884918	FALSE	TRUE	3	0	TRUE	1.54861	0		-0.114897
990	1	MPCP_MOUSE	MPCP_MOUSE		14	357	39633	Phosphate carrier protein, mitochondrial OS=Mus musculus GN=Slc25a3 PE=1 SV=1	4	4	1	0	0	1	0	0	1	2	0	0	1	0	0	1	2	0	0	1	0	0	1	2	0.9	0	0.821429	1.42857	1	0.857143	1.14286	0.878571	FALSE	TRUE	1	2	TRUE	0.7875	1	-0.344648	-0.431923
928	1	RBMX2_MOUSE	RBMX2_MOUSE		7.7	326	37537	RNA-binding motif protein, X-linked 2 OS=Mus musculus GN=Rbmx2 PE=1 SV=1	5	5	1	0	0	1	0	0	0	4	0	0	1	0	0	0	4	0	0	1	0	0	0	4	0.857143	0	0.714286	1.28571	0.857143	0	2.39629	0.872939	FALSE	TRUE	1	1	FALSE	0.714286	1.08448	-0.602425	-0.639982
711	1	SYNE1_MOUSE	SYNE1_MOUSE		0.8	8799	1009927	Nesprin-1 OS=Mus musculus GN=Syne1 PE=1 SV=2	9	3	0.333	1	1	1	0	0	1	5	1	0	0	0	0	0	2	1	0	0	0	0	0	4	2.33714	0	0	0.857143	0.571429	0	2.33714	0.871837	FALSE	TRUE	3	2	TRUE	0.798571	0.969524	-0.279855	-0.278864
146	1	ADH1_MOUSE	ADH1_MOUSE		5.9	375	39772	Alcohol dehydrogenase 1 OS=Mus musculus GN=Adh1 PE=2 SV=2	6	6	1	0	4	0	1	0	1	0	0	4	0	1	0	1	0	0	4	0	1	0	1	0	0	2.21429	0	3.28571	0	0.571429	0	0.867347	FALSE	TRUE	2	1	FALSE	1.375	0.190476	2.85175	2.93586
1008	1	ZKSC3_MOUSE	ZKSC3_MOUSE		12.1	553	62643	Zinc finger protein with KRAB and SCAN domains 3 OS=Mus musculus GN=Zkscan3 PE=2 SV=1	4	4	1	0	0	1	0	0	0	3	0	0	1	0	0	0	3	0	0	1	0	0	0	3	1	0	0.857143	1.42857	1	0	1.77686	0.866082	FALSE	TRUE	1	1	FALSE	0.821429	0.925619	-0.172283	-0.455691
243	1	RXRB_MOUSE	RXRB_MOUSE		12.7	520	55867	Retinoic acid receptor RXR-beta OS=Mus musculus GN=Rxrb PE=2 SV=2	32	3	0.094	2	8	11	0	1	0	10	2	0	0	0	1	0	0	2	0	0	0	1	0	0	3.73214	0	0	0	2.28571	0	0	0.859694	FALSE	FALSE	3	2	TRUE	0.933036	0.761905	0.292322	0.185795
941	1	ARP8_MOUSE	ARP8_MOUSE		8	624	70547	Actin-related protein 8 OS=Mus musculus GN=Actr8 PE=2 SV=1	5	5	1	0	1	0	0	0	2	2	0	1	0	0	0	2	2	0	1	0	0	0	2	2	0.857143	0.428571	0	1.30686	0.877571	1.42857	1.10886	0.858224	FALSE	TRUE	1	2	TRUE	0.648143	1.13833	-0.812539	-0.867818
1269	1	TBB3_MOUSE	TBB3_MOUSE		18	450	50420	Tubulin beta-3 chain OS=Mus musculus GN=Tubb3 PE=1 SV=1	19	0	0	0	5	1	0	0	5	8	0	0	0	0	0	0	0	0	0	0	0	0	0	0	1.42857	0	0.285714	2.42857	1.42857	0.428571	0	0.857143	FALSE	FALSE	2	2	TRUE	1.03571	0.619048	0.742504	0.469135
1087	1	MCRS1_MOUSE	MCRS1_MOUSE		5.4	462	51693	Microspherule protein 1 OS=Mus musculus GN=Mcrs1 PE=1 SV=1	3	3	1	0	2	0	0	0	0	1	0	2	0	0	0	0	1	0	2	0	0	0	0	1	1.14286	1.10886	0	1.72929	1.14286	0.285714	0.571429	0.854429	FALSE	TRUE	1	1	FALSE	0.99525	0.666667	0.578093	0.320535
912	1	DDX52_MOUSE	DDX52_MOUSE		7.7	598	67443	Probable ATP-dependent RNA helicase DDX52 OS=Mus musculus GN=Ddx52 PE=2 SV=1	5	5	1	0	1	1	0	0	1	2	0	1	1	0	0	1	2	0	1	1	0	0	1	2	0.857143	0.428571	0.714286	1.19043	0.857143	0.857143	1.07143	0.853735	FALSE	TRUE	2	2	TRUE	0.797607	0.928571	-0.219335	-0.200785
149	1	HBB1_MOUSE	HBB1_MOUSE		42.9	147	15841	Hemoglobin subunit beta-1 OS=Mus musculus GN=Hbb-b1 PE=1 SV=2	32	1	0.031	0	16	3	0	0	5	8	0	1	0	0	0	0	0	0	8.5	0	0	0	0	0	0	5.92857	0	0	0	0	0	0.846939	FALSE	FALSE	2	2	TRUE	1.48214	0		-0.0460573
150	1	HBB2_MOUSE	HBB2_MOUSE		42.9	147	15879	Hemoglobin subunit beta-2 OS=Mus musculus GN=Hbb-b2 PE=1 SV=2	32	1	0.031	0	16	3	0	0	5	8	0	1	0	0	0	0	0	0	8.5	0	0	0	0	0	0	5.92857	0	0	0	0	0	0.846939	FALSE	FALSE	2	2	TRUE	1.48214	0		-0.0612063
979	1	CDIPT_MOUSE	CDIPT_MOUSE		16	213	23600	CDP-diacylglycerol--inositol 3-phosphatidyltransferase OS=Mus musculus GN=Cdipt PE=1 SV=1	5	5	1	0	3	0	0	0	0	2	0	3	0	0	0	0	2	0	3	0	0	0	0	2	0.895429	1.42857	0	1.42857	1	0	1.14286	0.842204	FALSE	TRUE	1	1	FALSE	0.938143	0.714286	0.393306	0.244216
620	1	SPTB2_MOUSE	SPTB2_MOUSE		3.4	2363	274224	Spectrin beta chain, brain 1 OS=Mus musculus GN=Sptbn1 PE=1 SV=2	6	5	0.833	1	2	1	0	0	1	1	1	1	1	0	0	1	1	1	2	1	0	0	1	1	2.28571	0.857143	0.571429	0.571429	0.428571	0.747286	0.428571	0.841449	FALSE	TRUE	3	2	TRUE	1.07143	0.53481	1.00244	0.689569
1092	1	TNPO2_MOUSE	TNPO2_MOUSE		8.2	887	100457	Transportin-2 OS=Mus musculus GN=Tnpo2 PE=2 SV=1	18	2	0.111	0	5	5	3	0	3	2	0	1	1	0	0	0	0	0	1.5	1.25	0	0	0	0	1.14286	0.642857	0.892857	1.76186	1.14286	0.285714	0	0.838429	FALSE	FALSE	3	2	TRUE	1.11011	0.47619	1.22109	1.05638
685	1	HLTF_MOUSE	HLTF_MOUSE		6.3	1003	113318	Helicase-like transcription factor OS=Mus musculus GN=Hltf PE=1 SV=1	7	7	1	0	1	0	0	0	2	4	0	1	0	0	0	2	4	0	1	0	0	0	2	4	0.571429	0.285714	0	0.747286	0.571429	1.30614	2.32	0.828857	FALSE	TRUE	1	2	TRUE	0.401107	1.39919	-1.80253	-1.01618
75	1	ERCC2_MOUSE	ERCC2_MOUSE		10	760	86829	TFIIH basal transcription factor complex helicase subunit OS=Mus musculus GN=Ercc2 PE=2 SV=1	10	10	1	0	4	5	0	0	1	0	0	4	5	0	0	1	0	0	4	5	0	0	1	0	0	2	3.19043	0	0	0.571429	0	0.823122	FALSE	TRUE	2	1	FALSE	1.29761	0.190476	2.76817	2.02224
503	1	ML12B_MOUSE	ML12B_MOUSE		22.7	172	19780	Myosin regulatory light chain 12B OS=Mus musculus GN=Myl12b PE=1 SV=2	9	9	1	0	1	1	0	0	2	5	0	1	1	0	0	2	5	0	1	1	0	0	2	5	0.285714	0.285714	0.571429	0.285714	0.285714	1.15014	2.85714	0.817367	FALSE	TRUE	2	2	TRUE	0.357143	1.431	-2.00245	-1.10514
1012	1	TXND5_MOUSE	TXND5_MOUSE		6	417	46416	Thioredoxin domain-containing protein 5 OS=Mus musculus GN=Txndc5 PE=1 SV=2	4	4	1	0	1	0	0	0	0	3	0	1	0	0	0	0	3	0	1	0	0	0	0	3	1	0.428571	0	1.42857	1.00657	0	1.78571	0.807061	FALSE	TRUE	1	1	FALSE	0.714286	0.930762	-0.381911	-0.0849306
485	1	3MG_MOUSE	3MG_MOUSE		23.1	333	36489	DNA-3-methyladenine glycosylase OS=Mus musculus GN=Mpg PE=2 SV=2	9	9	1	0	1	1	0	0	1	6	0	1	1	0	0	1	6	0	1	1	0	0	1	6	0.142857	0.285714	0.571429	0.285714	0.285714	0.714286	3.322	0.801102	FALSE	TRUE	2	2	TRUE	0.321429	1.44067	-2.16417	-1.15667
932	1	TADA3_MOUSE	TADA3_MOUSE		14.8	432	48901	Transcriptional adapter 3 OS=Mus musculus GN=Tada3 PE=1 SV=1	4	4	1	0	1	1	0	0	2	0	0	1	1	0	0	2	0	0	1	1	0	0	2	0	0.857143	0.428571	0.723857	1.28571	0.857143	1.42857	0	0.797286	FALSE	TRUE	2	1	FALSE	0.823821	0.761905	0.112721	0.255466
308	1	MAT1_MOUSE	MAT1_MOUSE		18.8	309	35849	CDK-activating kinase assembly factor MAT1 OS=Mus musculus GN=Mnat1 PE=2 SV=2	9	9	1	0	3	6	0	0	0	0	0	3	6	0	0	0	0	0	3	6	0	0	0	0	0	1.42857	4.14286	0	0	0	0	0.795918	FALSE	TRUE	2	0	FALSE	1.39286	0		0.0632452
340	1	KDM2A_MOUSE	KDM2A_MOUSE		9	1161	132681	Lysine-specific demethylase 2A OS=Mus musculus GN=Kdm2a PE=1 SV=2	10	10	1	0	3	1	0	0	3	3	0	3	1	0	0	3	3	0	3	1	0	0	3	3	0	1.42857	0.571429	0	0	2.14286	1.42857	0.795918	FALSE	TRUE	2	2	TRUE	0.5	1.19048	-1.25154	-0.555978
504	1	T2FA_MOUSE	T2FA_MOUSE		8.3	508	57247	General transcription factor IIF subunit 1 OS=Mus musculus GN=Gtf2f1 PE=1 SV=1	4	4	1	0	0	0	0	2	0	2	0	0	0	0	2	0	2	0	0	0	0	2	0	2	0.285714	0	0	0.285714	4.14286	0	0.857143	0.795918	FALSE	TRUE	0	2	TRUE	0.142857	1.66667	-3.54432	-1.82686
1031	1	K1826_MOUSE	K1826_MOUSE		16.8	345	41248	Coiled-coil domain-containing protein KIAA1826 homolog OS=Mus musculus PE=2 SV=1	3	3	1	0	0	0	0	0	1	2	0	0	0	0	0	1	2	0	0	0	0	0	1	2	1	0	0	1.42857	1.10886	0.857143	1.14286	0.791061	FALSE	TRUE	0	2	TRUE	0.607143	1.03629	-0.771314	-0.251465
964	1	DHC24_MOUSE	DHC24_MOUSE		3.7	516	60113	24-dehydrocholesterol reductase OS=Mus musculus GN=Dhcr24 PE=2 SV=1	4	4	1	0	3	0	0	0	1	0	0	3	0	0	0	1	0	0	3	0	0	0	1	0	0.877571	1.42857	0	1.42857	0.933286	0.857143	0	0.789306	FALSE	TRUE	1	1	FALSE	0.933679	0.59681	0.645655	0.526835
70	1	NFIL3_MOUSE	NFIL3_MOUSE		5.4	462	50944	Nuclear factor interleukin-3-regulated protein OS=Mus musculus GN=Nfil3 PE=1 SV=1	5	5	1	0	0	0	0	2	2	1	0	0	0	0	2	2	1	0	0	0	0	2	2	1	0	0	0	0	3.884	1.14286	0.285714	0.758939	FALSE	TRUE	0	3	TRUE	0	1.77086		0.136535
69	1	BCL7C_MOUSE	BCL7C_MOUSE		10.1	217	23446	B-cell CLL/lymphoma 7 protein family member C OS=Mus musculus GN=Bcl7c PE=1 SV=1	28	2	0.071	0	4	6	0	2	7	9	0	0	1	0	0	0	1	0	0	3.5	0	0	0	5	0	0	2.35714	0	0	0	2.85714	0.744898	FALSE	FALSE	2	3	TRUE	0.589286	0.952381	-0.692571	-0.219371
120	1	DGC14_MOUSE	DGC14_MOUSE		13.4	479	52605	Protein DGCR14 OS=Mus musculus GN=Dgcr14 PE=2 SV=2	6	6	1	2	2	0	0	0	0	2	2	2	0	0	0	0	2	2	2	0	0	0	0	2	3.64286	0.714286	0	0	0	0	0.857143	0.744898	FALSE	TRUE	2	1	FALSE	1.08929	0.285714	1.93074	1.32735
124	1	DHB12_MOUSE	DHB12_MOUSE		18.6	312	34743	Estradiol 17-beta-dehydrogenase 12 OS=Mus musculus GN=Hsd17b12 PE=2 SV=1	10	10	1	0	3	2	0	0	1	4	0	3	2	0	0	1	4	0	3	2	0	0	1	4	0	1.30614	1	0	0	0.571429	2.28571	0.737612	FALSE	TRUE	2	2	TRUE	0.576536	0.952381	-0.724129	-0.407514
98	1	KLF12_MOUSE	KLF12_MOUSE		13.4	402	44216	Krueppel-like factor 12 OS=Mus musculus GN=Klf12 PE=2 SV=1	10	10	1	0	4	2	0	0	1	3	0	4	2	0	0	1	3	0	4	2	0	0	1	3	0	2.14286	1	0	0	0.571429	1.42857	0.734694	FALSE	TRUE	2	2	TRUE	0.785714	0.666667	0.237039	0.0881393
621	1	S26A2_MOUSE	S26A2_MOUSE		4.6	739	81605	Sulfate transporter OS=Mus musculus GN=Slc26a2 PE=1 SV=1	2	2	1	2	0	0	0	0	0	0	2	0	0	0	0	0	0	2	0	0	0	0	0	0	4.14286	0	0	0.571429	0.428571	0	0	0.734694	FALSE	TRUE	1	0	FALSE	1.17857	0.142857	3.04439	1.6863
262	1	PRDX1_MOUSE	PRDX1_MOUSE		22.6	199	22178	Peroxiredoxin-1 OS=Mus musculus GN=Prdx1 PE=1 SV=1	9	9	1	0	2	0	0	0	4	3	0	2	0	0	0	4	3	0	2	0	0	0	4	3	0	0.821429	0	0	0	2.85714	1.42857	0.729592	FALSE	TRUE	1	2	TRUE	0.205357	1.42857	-2.79837	-1.69784
630	1	MINT_MOUSE	MINT_MOUSE		2.4	3644	398755	Msx2-interacting protein OS=Mus musculus GN=Spen PE=1 SV=2	7	7	1	0	3	1	0	0	1	2	0	3	1	0	0	1	2	0	3	1	0	0	1	2	0.428571	1.42857	0.571429	0.572857	0.428571	0.760429	0.897571	0.726857	FALSE	TRUE	2	2	TRUE	0.750357	0.695524	0.109478	0.0327078
911	1	CN093_MOUSE	CN093_MOUSE		14	541	58781	Uncharacterized protein C14orf93 homolog OS=Mus musculus PE=2 SV=1	3	3	1	0	0	1	0	0	2	0	0	0	1	0	0	2	0	0	0	1	0	0	2	0	0.857143	0	0.714286	1.19043	0.857143	1.42857	0	0.721082	FALSE	TRUE	1	1	FALSE	0.690464	0.761905	-0.142044	-0.237406
977	1	CX056_MOUSE	CX056_MOUSE		14.4	222	25595	UPF0428 protein CXorf56 homolog OS=Mus musculus PE=2 SV=1	3	3	1	0	2	1	0	0	0	0	0	2	1	0	0	0	0	0	2	1	0	0	0	0	0.892857	1	0.771429	1.42857	0.933429	0	0	0.718041	FALSE	TRUE	2	0	FALSE	1.02321	0.311143	1.71746	0.930529
122	1	TF2H4_MOUSE	TF2H4_MOUSE		10.8	463	52225	General transcription factor IIH subunit 4 OS=Mus musculus GN=Gtf2h4 PE=2 SV=1	10	10	1	0	3	2	0	0	3	2	0	3	2	0	0	3	2	0	3	2	0	0	3	2	0	1.28571	1	0	0	1.85714	0.857143	0.714286	FALSE	TRUE	2	2	TRUE	0.571429	0.904762	-0.662965	-0.488906
474	1	TOP2A_MOUSE	TOP2A_MOUSE		9.2	1528	172878	DNA topoisomerase 2-alpha OS=Mus musculus GN=Top2a PE=1 SV=1	178	3	0.017	9	33	33	19	14	32	38	1	0	0	0	0	0	2	1.151	0	0	0	0	0	2.493	3.32771	0	0	0.285714	0	0	1.35614	0.709939	FALSE	FALSE	4	3	TRUE	0.903357	0.452048	0.998822	0.493463
993	1	SDOS_MOUSE	SDOS_MOUSE		11.4	211	23415	Protein syndesmos OS=Mus musculus GN=Nudt16l1 PE=1 SV=2	3	3	1	0	2	0	0	0	0	1	0	2	0	0	0	0	1	0	2	0	0	0	0	1	0.933429	1	0	1.42857	1	0	0.571429	0.704776	FALSE	TRUE	1	1	FALSE	0.8405	0.52381	0.682206	0.298765
102	1	NTHL1_MOUSE	NTHL1_MOUSE		12.7	300	33648	Endonuclease III-like protein 1 OS=Mus musculus GN=Nthl1 PE=2 SV=1	9	9	1	0	4	4	0	0	0	1	0	4	4	0	0	0	1	0	4	4	0	0	0	1	0	2.16886	2.43257	0	0	0	0.285714	0.698163	FALSE	TRUE	2	1	FALSE	1.15036	0.0952381	3.5944	2.17241
907	1	DHSA_MOUSE	DHSA_MOUSE		7.5	664	72586	Succinate dehydrogenase [ubiquinone] flavoprotein subunit, mitochondrial OS=Mus musculus GN=Sdha PE=1 SV=1	3	3	1	0	0	0	0	0	2	1	0	0	0	0	0	2	1	0	0	0	0	0	2	1	0.857143	0	0	1.15014	0.857143	1.42857	0.571429	0.694918	FALSE	TRUE	0	2	TRUE	0.501821	0.952381	-0.924365	-0.516956
53	1	TRM1L_MOUSE	TRM1L_MOUSE		8.9	728	80862	TRM1-like protein OS=Mus musculus GN=Trm1l PE=2 SV=1	10	10	1	0	3	3	0	0	1	3	0	3	3	0	0	1	3	0	3	3	0	0	1	3	0	1.28571	1.57143	0	0	0.571429	1.42857	0.693878	FALSE	TRUE	2	2	TRUE	0.714286	0.666667	0.0995357	0.103307
345	1	CIRBP_MOUSE	CIRBP_MOUSE		26.7	172	18608	Cold-inducible RNA-binding protein OS=Mus musculus GN=Cirbp PE=1 SV=1	9	9	1	0	5	1	0	0	0	3	0	5	1	0	0	0	3	0	5	1	0	0	0	3	0	2.85714	0.571429	0	0	0	1.42857	0.693878	FALSE	TRUE	2	1	FALSE	0.857143	0.47619	0.847997	0.733638
413	1	SPT41_MOUSE	SPT41_MOUSE		30.8	117	13194	Transcription elongation factor SPT4 1 OS=Mus musculus GN=Supt4h1 PE=2 SV=1	9	9	1	0	1	1	0	0	2	5	0	1	1	0	0	2	5	0	1	1	0	0	2	5	0	0.285714	0.571429	0	0	1.14286	2.85714	0.693878	FALSE	TRUE	2	2	TRUE	0.214286	1.33333	-2.63743	-1.62653
936	1	ZCHC9_MOUSE	ZCHC9_MOUSE		9.5	273	30765	Zinc finger CCHC domain-containing protein 9 OS=Mus musculus GN=Zcchc9 PE=2 SV=1	3	3	1	0	0	1	0	0	0	2	0	0	1	0	0	0	2	0	0	1	0	0	0	2	0.857143	0	0.747286	1.29243	0.868143	0	1.07143	0.690918	FALSE	TRUE	1	1	FALSE	0.724214	0.646524	0.163713	0.28582
292	1	CX7A2_MOUSE	CX7A2_MOUSE		27.7	83	9292	Cytochrome c oxidase subunit 7A2, mitochondrial OS=Mus musculus GN=Cox7a2 PE=1 SV=2	6	6	1	0	0	2	0	1	2	1	0	0	2	0	1	2	1	0	0	2	0	1	2	1	0	0	1.10886	0	2.28571	1.14286	0.285714	0.68902	FALSE	TRUE	1	3	TRUE	0.277214	1.2381	-2.15905	-1.27667
595	1	SMRD1_MOUSE	SMRD1_MOUSE		9.1	515	58246	SWI/SNF-related matrix-associated actin-dependent regulator of chromatin subfamily D member 1 OS=Mus musculus GN=Smarcd1 PE=1 SV=3	54	4	0.074	0	12	9	2	9	10	12	0	1	1	0	0	0	2	0	2.375	1.533	0	0	0	2.556	0.285714	1.19643	0.933286	0.571429	0.428571	0	1.36514	0.682939	FALSE	FALSE	3	3	TRUE	0.746714	0.597905	0.320641	0.529332
1038	1	FADS1_MOUSE	FADS1_MOUSE		4.3	447	52324	Fatty acid desaturase 1 OS=Mus musculus GN=Fads1 PE=2 SV=1	2	2	1	0	2	0	0	0	0	0	0	2	0	0	0	0	0	0	2	0	0	0	0	0	1.00457	1.05957	0	1.43871	1.12857	0.142857	0	0.682041	FALSE	TRUE	1	0	FALSE	0.875714	0.42381	1.04704	0.993907
112	1	NIPS1_MOUSE	NIPS1_MOUSE		12.7	284	33364	Protein NipSnap homolog 1 OS=Mus musculus GN=Nipsnap1 PE=1 SV=1	9	9	1	0	4	0	0	0	2	3	0	4	0	0	0	2	3	0	4	0	0	0	2	3	0	2.17143	0	0	0	1.14286	1.42857	0.677551	FALSE	TRUE	1	2	TRUE	0.542857	0.857143	-0.658963	-0.15574
64	1	ERR1_MOUSE	ERR1_MOUSE		15.4	422	45439	Steroid hormone receptor ERR1 OS=Mus musculus GN=Esrra PE=1 SV=3	7	7	1	0	1	2	0	1	0	3	0	1	2	0	1	0	3	0	1	2	0	1	0	3	0	0.142857	1	0	2.16886	0	1.42857	0.677184	FALSE	TRUE	2	2	TRUE	0.285714	1.19914	-2.06936	-1.09979
39	1	GPTC8_MOUSE	GPTC8_MOUSE		6	1505	164988	G patch domain-containing protein 8 OS=Mus musculus GN=Gpatch8 PE=2 SV=1	10	7	0.7	0	3	1	0	0	2	4	0	3	0	0	0	1	3	0	3	0	0	0	2	4	0	1.28571	0	0	0	1.14286	2.28571	0.673469	FALSE	TRUE	2	2	TRUE	0.321429	1.14286	-1.83007	-0.847743
46	1	VIR_MOUSE	VIR_MOUSE		5	1811	201440	Protein virilizer homolog OS=Mus musculus GN=Kiaa1429 PE=1 SV=1	8	8	1	0	0	4	0	0	0	4	0	0	4	0	0	0	4	0	0	4	0	0	0	4	0	0	2.42857	0	0	0	2.28571	0.673469	FALSE	TRUE	1	1	FALSE	0.607143	0.761905	-0.327575	0.341574
117	1	CBX4_MOUSE	CBX4_MOUSE		8.5	551	60524	E3 SUMO-protein ligase CBX4 OS=Mus musculus GN=Cbx4 PE=1 SV=2	6	6	1	0	3	0	0	1	2	0	0	3	0	0	1	2	0	0	3	0	0	1	2	0	0	1.28571	0	0	2.23557	1.14286	0	0.666306	FALSE	TRUE	1	2	TRUE	0.321429	1.12614	-1.80882	-0.784831
142	1	COPE_MOUSE	COPE_MOUSE		19.5	308	34568	Coatomer subunit epsilon OS=Mus musculus GN=Cope PE=2 SV=3	9	9	1	0	2	2	0	0	1	4	0	2	2	0	0	1	4	0	2	2	0	0	1	4	0	0.723857	1	0	0	0.571429	2.28571	0.654429	FALSE	TRUE	2	2	TRUE	0.430964	0.952381	-1.14397	-0.212972
521	1	NOM1_MOUSE	NOM1_MOUSE		2.7	854	95947	Nucleolar MIF4G domain-containing protein 1 OS=Mus musculus GN=Nom1 PE=2 SV=1	4	4	1	0	1	2	0	1	0	0	0	1	2	0	1	0	0	0	1	2	0	1	0	0	0.285714	0.285714	1.14286	0.428571	2.36729	0	0	0.644306	FALSE	TRUE	2	1	FALSE	0.535714	0.789095	-0.558736	0.182125
104	1	CP2J5_MOUSE	CP2J5_MOUSE		9.8	501	57785	Cytochrome P450 2J5 OS=Mus musculus GN=Cyp2j5 PE=2 SV=1	8	6	0.75	0	0	4	0	0	0	4	0	0	3	0	0	0	3	0	0	3.214	0	0	0	3.273	0	0	2.31629	0	0	0	2.18186	0.642592	FALSE	TRUE	1	1	FALSE	0.579071	0.727286	-0.328781	0.431152
605	1	LAMA3_MOUSE	LAMA3_MOUSE		1.2	3333	366038	Laminin subunit alpha-3 OS=Mus musculus GN=Lama3 PE=1 SV=3	3	3	1	0	0	0	0	1	0	2	0	0	0	0	1	0	2	0	0	0	0	1	0	2	0.428571	0	0	0.571429	2.511	0	0.892286	0.629041	FALSE	TRUE	0	2	TRUE	0.25	1.13443	-2.18197	-1.32609
840	1	ING4_MOUSE	ING4_MOUSE		8.4	249	28529	Inhibitor of growth protein 4 OS=Mus musculus GN=Ing4 PE=1 SV=2	4	2	0.5	0	3	0	0	0	1	0	0	1	0	0	0	1	0	0	1.5	0	0	0	1	0	0.857143	0.642857	0	1.10886	0.857143	0.857143	0	0.617592	FALSE	TRUE	1	1	FALSE	0.652214	0.571429	0.190773	0.622531
131	1	MEN1_MOUSE	MEN1_MOUSE		6.2	611	67474	Menin OS=Mus musculus GN=Men1 PE=2 SV=1	9	9	1	0	3	3	0	0	0	3	0	3	3	0	0	0	3	0	3	3	0	0	0	3	0	1.30686	1.57143	0	0	0	1.42857	0.615265	FALSE	TRUE	2	1	FALSE	0.719571	0.47619	0.595599	1.07097
651	1	PAPD5_MOUSE	PAPD5_MOUSE		7	633	69705	PAP-associated domain-containing protein 5 OS=Mus musculus GN=Papd5 PE=2 SV=2	5	5	1	0	2	0	0	0	2	1	0	2	0	0	0	2	1	0	2	0	0	0	2	1	0.428571	0.857143	0	0.657143	0.571429	1.28571	0.428571	0.604082	FALSE	TRUE	1	2	TRUE	0.485714	0.761905	-0.649503	-0.0348181
81	1	TERF2_MOUSE	TERF2_MOUSE		10	541	60265	Telomeric repeat-binding factor 2 OS=Mus musculus GN=Terf2 PE=1 SV=2	6	6	1	0	1	1	0	1	2	1	0	1	1	0	1	2	1	0	1	1	0	1	2	1	0	0.142857	0.428571	0	2.19043	1.14286	0.285714	0.598633	FALSE	TRUE	2	3	TRUE	0.142857	1.20633	-3.07798	-2.08741
534	1	KDM5A_MOUSE	KDM5A_MOUSE		3	1690	192217	Lysine-specific demethylase 5A OS=Mus musculus GN=Kdm5a PE=1 SV=2	3	3	1	1	0	0	0	0	2	0	1	0	0	0	0	2	0	1	0	0	0	0	2	0	2.28571	0	0	0.428571	0.285714	1.19043	0	0.598633	FALSE	TRUE	1	1	FALSE	0.678571	0.492048	0.463703	0.69097
66	1	MTP_MOUSE	MTP_MOUSE		6.8	894	99100	Microsomal triglyceride transfer protein large subunit OS=Mus musculus GN=Mttp PE=2 SV=2	6	6	1	0	2	1	0	1	1	1	0	2	1	0	1	1	1	0	2	1	0	1	1	1	0	0.714286	0.428571	0	2.17143	0.571429	0.285714	0.595918	FALSE	TRUE	2	3	TRUE	0.285714	1.00952	-1.82103	-1.10249
938	1	TMED4_MOUSE	TMED4_MOUSE		12.3	227	26023	Transmembrane emp24 domain-containing protein 4 OS=Mus musculus GN=Tmed4 PE=2 SV=1	12	1	0.083	0	3	2	0	0	2	5	0	0	0	0	0	1	0	0	0	0	0	0	1.5	0	0.857143	0	0	1.30614	0.877571	1.07143	0	0.587469	FALSE	FALSE	2	2	TRUE	0.540821	0.649667	-0.264547	0.0154362
772	1	NELFA_MOUSE	NELFA_MOUSE		6.6	530	57586	Negative elongation factor A OS=Mus musculus GN=Whsc2 PE=1 SV=1	4	4	1	0	2	0	0	0	0	2	0	2	0	0	0	0	2	0	2	0	0	0	0	2	0.642857	0.868143	0	0.857143	0.714286	0	1	0.583204	FALSE	TRUE	1	1	FALSE	0.592036	0.571429	0.051111	0.308519
230	1	3BHS3_MOUSE	3BHS3_MOUSE		7	373	42032	3 beta-hydroxysteroid dehydrogenase/Delta 5-->4-isomerase type 3 OS=Mus musculus GN=Hsd3b3 PE=2 SV=3	8	8	1	0	3	1	0	0	3	1	0	3	1	0	0	3	1	0	3	1	0	0	3	1	0	1.36514	0.428571	0	0	1.93757	0.285714	0.573857	FALSE	TRUE	2	2	TRUE	0.448429	0.741095	-0.724781	-0.271516
827	1	AOFB_MOUSE	AOFB_MOUSE		6	520	58545	Amine oxidase [flavin-containing] B OS=Mus musculus GN=Maob PE=1 SV=3	3	3	1	0	3	0	0	0	0	0	0	3	0	0	0	0	0	0	3	0	0	0	0	0	0.724857	1.42857	0	1	0.857143	0	0	0.572939	FALSE	TRUE	1	0	FALSE	0.788357	0.285714	1.46428	1.24544
934	1	SIRT3_MOUSE	SIRT3_MOUSE		11.3	257	28823	NAD-dependent deacetylase sirtuin-3 OS=Mus musculus GN=Sirt3 PE=2 SV=1	2	2	1	0	2	0	0	0	0	0	0	2	0	0	0	0	0	0	2	0	0	0	0	0	0.857143	1	0	1.28571	0.859143	0	0	0.571714	FALSE	TRUE	1	0	FALSE	0.785714	0.286381	1.45607	1.23871
823	1	APC5_MOUSE	APC5_MOUSE		4.3	740	83099	Anaphase-promoting complex subunit 5 OS=Mus musculus GN=Anapc5 PE=2 SV=1	2	2	1	0	0	0	0	0	2	0	0	0	0	0	0	2	0	0	0	0	0	0	2	0	0.714286	0	0	1	0.857143	1.42857	0	0.571429	FALSE	TRUE	0	1	FALSE	0.428571	0.761905	-0.830075	-0.259348
1057	1	K2C5_MOUSE	K2C5_MOUSE		6.4	580	61768	Keratin, type II cytoskeletal 5 OS=Mus musculus GN=Krt5 PE=1 SV=1	127	0	0	22	14	24	12	28	15	12	0	0	0	0	0	0	0	0	0	0	0	0	0	0	1.10886	0	0	1.57143	1.14286	0.142857	0	0.566571	FALSE	FALSE	4	3	TRUE	0.670071	0.428571	0.644779	0.785856
533	1	NR1D1_MOUSE	NR1D1_MOUSE		8	615	66803	Nuclear receptor subfamily 1 group D member 1 OS=Mus musculus GN=Nr1d1 PE=1 SV=1	6	4	0.667	0	5	0	0	0	0	1	0	3	0	0	0	0	1	0	4.5	0	0	0	0	1	0.285714	2.511	0	0.428571	0.285714	0	0.428571	0.562796	FALSE	TRUE	1	1	FALSE	0.806321	0.238095	1.75982	1.48865
741	1	DHX33_MOUSE	DHX33_MOUSE		3.4	698	78348	Putative ATP-dependent RNA helicase DHX33 OS=Mus musculus GN=Dhx33 PE=1 SV=1	3	3	1	0	0	0	0	0	1	2	0	0	0	0	0	1	2	0	0	0	0	0	1	2	0.571429	0	0	0.857143	0.642857	0.857143	1	0.561224	FALSE	TRUE	0	2	TRUE	0.357143	0.833333	-1.22239	-0.590261
732	1	RSBN1_MOUSE	RSBN1_MOUSE		4.5	795	89252	Round spermatid basic protein 1 OS=Mus musculus GN=Rsbn1 PE=1 SV=3	3	3	1	0	0	0	0	0	1	2	0	0	0	0	0	1	2	0	0	0	0	0	1	2	0.571429	0	0	0.857143	0.642857	0.857143	0.933429	0.551714	FALSE	TRUE	0	2	TRUE	0.357143	0.811143	-1.18345	-0.515899
885	1	BAG4_MOUSE	BAG4_MOUSE		3.3	457	49096	BAG family molecular chaperone regulator 4 OS=Mus musculus GN=Bag4 PE=1 SV=2	2	2	1	0	2	0	0	0	0	0	0	2	0	0	0	0	0	0	2	0	0	0	0	0	0.857143	1	0	1.14286	0.857143	0	0	0.55102	FALSE	TRUE	1	0	FALSE	0.75	0.285714	1.39232	1.20698
211	1	PLMN_MOUSE	PLMN_MOUSE		8.4	812	90783	Plasminogen OS=Mus musculus GN=Plg PE=1 SV=2	7	7	1	0	0	1	0	0	2	4	0	0	1	0	0	2	4	0	0	1	0	0	2	4	0	0	0.428571	0	0	1.14286	2.28571	0.55102	FALSE	TRUE	1	2	TRUE	0.107143	1.14286	-3.41504	-2.13715
316	1	CNBP_MOUSE	CNBP_MOUSE		19.7	178	19593	Cellular nucleic acid-binding protein OS=Mus musculus GN=Cnbp PE=2 SV=2	7	7	1	0	2	3	0	0	2	0	0	2	3	0	0	2	0	0	2	3	0	0	2	0	0	0.857143	1.76186	0	0	1.14286	0	0.537408	FALSE	TRUE	2	1	FALSE	0.65475	0.380952	0.781333	0.793938
334	1	EF2_MOUSE	EF2_MOUSE		4.8	858	95315	Elongation factor 2 OS=Mus musculus GN=Eef2 PE=1 SV=2	29	5	0.172	4	3	4	2	2	6	8	0	1	1	0	0	1	2	0	1.01	1.014	0	0	1.032	2.047	0	0.572857	0.859143	0	0	1.00457	1.29243	0.532714	FALSE	FALSE	4	3	TRUE	0.358	0.765667	-1.09676	-0.545124
715	1	B4GN4_MOUSE	B4GN4_MOUSE		1.9	1034	117374	N-acetyl-beta-glucosaminyl-glycoprotein 4-beta-N-acetylgalactosaminyltransferase 1 OS=Mus musculus GN=B4galnt4 PE=2 SV=1	4	4	1	0	1	0	0	0	0	3	0	1	0	0	0	0	3	0	1	0	0	0	0	3	0.571429	0.285714	0	0.857143	0.572857	0	1.42857	0.530816	FALSE	TRUE	1	1	FALSE	0.428571	0.667143	-0.63846	-0.18118
57	1	ZCHC7_MOUSE	ZCHC7_MOUSE		5.7	541	63001	Zinc finger CCHC domain-containing protein 7 OS=Mus musculus GN=Zcchc7 PE=2 SV=1	7	7	1	0	1	1	0	0	4	1	0	1	1	0	0	4	1	0	1	1	0	0	4	1	0	0.142857	0.428571	0	0	2.85714	0.285714	0.530612	FALSE	TRUE	2	2	TRUE	0.142857	1.04762	-2.87447	-1.64763
635	1	CCPG1_MOUSE	CCPG1_MOUSE		4.6	753	86127	Cell cycle progression protein 1 OS=Mus musculus GN=Ccpg1 PE=1 SV=2	4	4	1	0	0	0	0	0	2	2	0	0	0	0	0	2	2	0	0	0	0	0	2	2	0.428571	0	0	0.595286	0.428571	1.28571	0.9	0.519735	FALSE	TRUE	0	2	TRUE	0.255964	0.871429	-1.76744	-0.922703
550	1	CJ018_MOUSE	CJ018_MOUSE		4.2	2382	264279	Uncharacterized protein C10orf18 homolog OS=Mus musculus GN=Kiaa2006 PE=2 SV=2	5	5	1	0	1	2	0	0	2	0	0	1	2	0	0	2	0	0	1	2	0	0	2	0	0.285714	0.285714	1.14286	0.428571	0.285714	1.19643	0	0.517857	FALSE	TRUE	2	1	FALSE	0.535714	0.494048	0.116814	0.477565
830	1	AT2L1_MOUSE	AT2L1_MOUSE		5.6	499	55497	Alanine--glyoxylate aminotransferase 2-like 1 OS=Mus musculus GN=Agxt2l1 PE=2 SV=1	2	2	1	0	0	0	0	0	0	2	0	0	0	0	0	0	2	0	0	0	0	0	0	2	0.760429	0	0	1.00657	0.857143	0	1	0.517735	FALSE	TRUE	0	1	FALSE	0.44175	0.619048	-0.48682	0.22006
225	1	CP2DB_MOUSE	CP2DB_MOUSE		8.9	505	57156	Cytochrome P450 2D11 OS=Mus musculus GN=Cyp2d11 PE=2 SV=1	17	3	0.176	0	3	6	0	0	4	4	0	0	1	0	0	0	2	0	0	2.071	0	0	0	3.182	0	0	1.43871	0	0	0	2.16886	0.515367	FALSE	FALSE	2	2	TRUE	0.359679	0.722952	-1.00719	-0.209056
55	1	PHRF1_MOUSE	PHRF1_MOUSE		7.1	1682	184082	PHD and RING finger domain-containing protein 1 OS=Mus musculus GN=Phrf1 PE=1 SV=2	5	5	1	1	0	2	0	0	0	2	1	0	2	0	0	0	2	1	0	2	0	0	0	2	1.73586	0	1	0	0	0	0.857143	0.513286	FALSE	TRUE	2	1	FALSE	0.683964	0.285714	1.25935	1.18446
125	1	WIZ_MOUSE	WIZ_MOUSE		5.7	1684	184292	Protein Wiz OS=Mus musculus GN=Wiz PE=1 SV=2	6	6	1	0	1	5	0	0	0	0	0	1	5	0	0	0	0	0	1	5	0	0	0	0	0	0.285714	3.21771	0	0	0	0	0.50049	FALSE	TRUE	2	0	FALSE	0.875857	0		0.422893
162	1	ITB1_MOUSE	ITB1_MOUSE		3.9	798	88232	Integrin beta-1 OS=Mus musculus GN=Itgb1 PE=1 SV=1	7	7	1	0	1	2	0	0	3	1	0	1	2	0	0	3	1	0	1	2	0	0	3	1	0	0.285714	1.00657	0	0	1.91071	0.285714	0.498388	FALSE	TRUE	2	2	TRUE	0.323071	0.732143	-1.18027	-0.516852
820	1	CP080_MOUSE	CP080_MOUSE		14.5	193	22749	UPF0468 protein C16orf80 homolog OS=Mus musculus GN=Gtl3 PE=2 SV=1	2	2	1	0	2	0	0	0	0	0	0	2	0	0	0	0	0	0	2	0	0	0	0	0	0.714286	0.933286	0	1	0.821429	0	0	0.495571	FALSE	TRUE	1	0	FALSE	0.661893	0.27381	1.27343	1.16026
152	1	MUP3_MOUSE	MUP3_MOUSE		10.3	184	21466	Major urinary protein 3 OS=Mus musculus GN=Mup3 PE=1 SV=1	8	2	0.25	0	0	5	0	0	2	1	0	0	2	0	0	0	0	0	0	5	0	0	0	0	0	0	3.22857	0	0	0	0	0.461224	FALSE	FALSE	1	2	TRUE	0.807143	0		0.257577
201	1	SBP1_MOUSE	SBP1_MOUSE		7.8	472	52515	Selenium-binding protein 1 OS=Mus musculus GN=Selenbp1 PE=1 SV=2	5	5	1	0	0	0	0	0	4	1	0	0	0	0	0	4	1	0	0	0	0	0	4	1	0	0	0	0	0	2.85714	0.285714	0.44898	FALSE	TRUE	0	2	TRUE	0	1.04762		0.254947
482	1	CDK7_MOUSE	CDK7_MOUSE		20.5	346	38969	Cell division protein kinase 7 OS=Mus musculus GN=Cdk7 PE=1 SV=2	5	5	1	0	3	0	0	0	1	1	0	3	0	0	0	1	1	0	3	0	0	0	1	1	0.142857	1.42857	0	0.285714	0.142857	0.714286	0.428571	0.44898	FALSE	TRUE	1	2	TRUE	0.464286	0.428571	0.115477	0.272633
228	1	URIC_MOUSE	URIC_MOUSE		20.1	303	35040	Uricase OS=Mus musculus GN=Uox PE=1 SV=2	6	6	1	0	1	0	0	0	3	2	0	1	0	0	0	3	2	0	1	0	0	0	3	2	0	0.285714	0	0	0	1.91157	0.857143	0.436347	FALSE	TRUE	1	2	TRUE	0.0714286	0.922905	-3.69161	-2.85462
671	1	PAXI1_MOUSE	PAXI1_MOUSE		2.7	1056	119270	PAX-interacting protein 1 OS=Mus musculus GN=Paxip1 PE=1 SV=1	2	2	1	0	0	0	0	0	2	0	0	0	0	0	0	2	0	0	0	0	0	0	2	0	0.428571	0	0	0.714286	0.571429	1.29243	0	0.429531	FALSE	TRUE	0	1	FALSE	0.285714	0.621286	-1.12068	-0.808414
746	1	FBLL1_MOUSE	FBLL1_MOUSE		22.6	314	33340	rRNA/tRNA 2'-O-methyltransferase fibrillarin-like protein 1 OS=Mus musculus GN=Fbll1 PE=2 SV=1	303	1	0.003	32	19	39	31	48	17	117	0	0	1	0	0	0	0	0	0	1.268	0	0	0	0	0.571429	0	0.895429	0.857143	0.666714	0	0	0.427245	FALSE	FALSE	4	3	TRUE	0.581	0.222238	1.38643	0.92019
346	1	IF4A1_MOUSE	IF4A1_MOUSE		12.8	406	46155	Eukaryotic initiation factor 4A-I OS=Mus musculus GN=Eif4a1 PE=2 SV=1	123	4	0.033	7	25	26	5	2	29	29	0	0	2	0	0	0	2	0	0	2.552	0	0	0	2.562	0	0	1.50743	0	0	0	1.366	0.41049	FALSE	FALSE	4	3	TRUE	0.376857	0.455333	-0.272905	-0.265284
43	1	MED14_MOUSE	MED14_MOUSE		4.1	1459	160967	Mediator of RNA polymerase II transcription subunit 14 OS=Mus musculus GN=Med14 PE=1 SV=1	6	6	1	0	4	0	0	0	0	2	0	4	0	0	0	0	2	0	4	0	0	0	0	2	0	2	0	0	0	0	0.857143	0.408163	FALSE	TRUE	1	1	FALSE	0.5	0.285714	0.807355	0.567779
574	1	GCDH_MOUSE	GCDH_MOUSE		10.7	438	48648	Glutaryl-CoA dehydrogenase, mitochondrial OS=Mus musculus GN=Gcdh PE=2 SV=1	3	3	1	0	2	0	0	0	1	0	0	2	0	0	0	1	0	0	2	0	0	0	1	0	0.285714	0.857143	0	0.571429	0.428571	0.714286	0	0.408163	FALSE	TRUE	1	1	FALSE	0.428571	0.380952	0.169925	0.206825
255	1	RAB18_MOUSE	RAB18_MOUSE		21.4	206	23036	Ras-related protein Rab-18 OS=Mus musculus GN=Rab18 PE=2 SV=2	5	5	1	0	4	0	0	0	1	0	0	4	0	0	0	1	0	0	4	0	0	0	1	0	0	2.28571	0	0	0	0.571429	0	0.408163	FALSE	TRUE	1	1	FALSE	0.571429	0.190476	1.58496	1.12625
306	1	HDGF_MOUSE	HDGF_MOUSE		24.9	237	26270	Hepatoma-derived growth factor OS=Mus musculus GN=Hdgf PE=1 SV=2	9	5	0.556	0	3	0	0	0	1	5	0	3	0	0	0	1	1	0	3	0	0	0	1	1.074	0	1.4	0	0	0	0.626143	0.724857	0.393	FALSE	TRUE	1	2	TRUE	0.35	0.450333	-0.363638	-0.0515046
82	1	GOSR2_MOUSE	GOSR2_MOUSE		12.7	212	24726	Golgi SNAP receptor complex member 2 OS=Mus musculus GN=Gosr2 PE=2 SV=2	6	6	1	0	1	2	0	0	1	2	0	1	2	0	0	1	2	0	1	2	0	0	1	2	0	0.285714	1	0	0	0.571429	0.857143	0.387755	FALSE	TRUE	2	2	TRUE	0.321429	0.47619	-0.567041	-0.259445
289	1	RFX1_MOUSE	RFX1_MOUSE		5.7	963	103695	MHC class II regulatory factor RFX1 OS=Mus musculus GN=Rfx1 PE=2 SV=1	6	6	1	0	2	1	0	0	1	2	0	2	1	0	0	1	2	0	2	1	0	0	1	2	0	0.857143	0.428571	0	0	0.571429	0.857143	0.387755	FALSE	TRUE	2	2	TRUE	0.321429	0.47619	-0.567041	-0.289288
478	1	CTNB1_MOUSE	CTNB1_MOUSE		5.4	781	85472	Catenin beta-1 OS=Mus musculus GN=Ctnnb1 PE=1 SV=1	5	5	1	0	1	2	0	0	0	2	0	1	2	0	0	0	2	0	1	2	0	0	0	2	0	0.285714	1.14286	0.285714	0.142857	0	0.857143	0.387755	FALSE	TRUE	2	1	FALSE	0.428571	0.333333	0.36257	0.301295
148	1	HA1B_MOUSE	HA1B_MOUSE		14.1	369	41303	H-2 class I histocompatibility antigen, K-B alpha chain OS=Mus musculus GN=H2-K1 PE=1 SV=1	6	3	0.5	0	3	2	0	0	0	1	0	1	1	0	0	0	1	0	3	2	0	0	0	1	0	1.35714	1	0	0	0	0.285714	0.377551	FALSE	TRUE	2	1	FALSE	0.589286	0.0952381	2.62936	1.84391
815	1	MYST4_MOUSE	MYST4_MOUSE		1	1872	208540	Histone acetyltransferase MYST4 OS=Mus musculus GN=Myst4 PE=2 SV=2	27	0	0	1	7	5	0	1	5	8	0	0	0	0	0	0	0	0	0	0	0	0	0	0	0.714286	0	0	1	0.771429	0	0	0.355102	FALSE	FALSE	3	3	TRUE	0.428571	0.257143	0.736966	0.520999
650	1	R12BB_MOUSE	R12BB_MOUSE		3.7	834	96437	RNA-binding protein 12B-B OS=Mus musculus GN=Rbm12bb PE=1 SV=1	8	1	0.125	0	2	0	0	0	2	4	0	0	0	0	0	0	1	0	0	0	0	0	0	1.75	0.428571	0	0	0.657143	0.571429	0	0.821429	0.354082	FALSE	FALSE	1	2	TRUE	0.271429	0.464286	-0.77444	-0.539803
528	1	NXT2_MOUSE	NXT2_MOUSE		21.1	142	16258	NTF2-related export protein 2 OS=Mus musculus GN=Nxt2 PE=2 SV=1	15	2	0.133	0	5	4	0	1	2	3	0	1	0	0	0	0	1	0	1.667	0	0	0	0	1.4	0.285714	0.666714	0	0.428571	0.285714	0	0.771429	0.348306	FALSE	FALSE	2	3	TRUE	0.34525	0.352381	-0.0294945	-0.0304949
441	1	DHB5_MOUSE	DHB5_MOUSE		6.5	323	37049	Estradiol 17 beta-dehydrogenase 5 OS=Mus musculus GN=Akr1c6 PE=1 SV=1	4	4	1	0	0	0	0	0	1	3	0	0	0	0	0	1	3	0	0	0	0	0	1	3	0	0	0	0.285714	0	0.714286	1.42857	0.346939	FALSE	TRUE	0	2	TRUE	0.0714286	0.714286	-3.32193	-2.25474
551	1	ACD_MOUSE	ACD_MOUSE		10.3	416	44714	Adrenocortical dysplasia protein OS=Mus musculus GN=Acd PE=1 SV=1	3	3	1	0	0	0	0	0	0	3	0	0	0	0	0	0	3	0	0	0	0	0	0	3	0.285714	0	0	0.428571	0.285714	0	1.42857	0.346939	FALSE	TRUE	0	1	FALSE	0.178571	0.571429	-1.67807	-1.04732
627	1	TLE1_MOUSE	TLE1_MOUSE		2.3	770	83098	Transducin-like enhancer protein 1 OS=Mus musculus GN=Tle1 PE=1 SV=2	2	2	1	0	0	0	0	0	0	2	0	0	0	0	0	0	2	0	0	0	0	0	0	2	0.428571	0	0	0.571429	0.428571	0	0.895429	0.332	FALSE	TRUE	0	1	FALSE	0.25	0.441333	-0.819941	-0.470247
500	1	CUL4A_MOUSE	CUL4A_MOUSE		6.7	759	87754	Cullin-4A OS=Mus musculus GN=Cul4a PE=2 SV=1	3	3	1	0	2	1	0	0	0	0	0	2	1	0	0	0	0	0	2	1	0	0	0	0	0.285714	0.857143	0.571429	0.285714	0.285714	0	0	0.326531	FALSE	TRUE	2	0	FALSE	0.5	0.0952381	2.39232	1.52736
781	1	K2C75_MOUSE	K2C75_MOUSE		8.9	551	59742	Keratin, type II cytoskeletal 75 OS=Mus musculus GN=Krt75 PE=1 SV=1	149	0	0	24	18	27	17	32	17	14	0	0	0	0	0	0	0	0	0	0	0	0	0	0	0.657143	0	0	0.877571	0.723857	0	0	0.322653	FALSE	FALSE	4	3	TRUE	0.383679	0.241286	0.669156	0.463796
95	1	CP4AE_MOUSE	CP4AE_MOUSE		8.3	507	58721	Cytochrome P450 4A14 OS=Mus musculus GN=Cyp4a14 PE=2 SV=1	25	2	0.08	0	4	7	0	4	4	6	0	2	0	0	0	0	0	0	4	0	0	0	0	0	0	2.14286	0	0	0	0	0	0.306122	FALSE	FALSE	2	3	TRUE	0.535714	0		0.0500844
462	1	GRM1_MOUSE	GRM1_MOUSE		2.3	1199	133213	Metabotropic glutamate receptor 1 OS=Mus musculus GN=Grm1 PE=2 SV=2	4	4	1	0	1	0	0	0	1	2	0	1	0	0	0	1	2	0	1	0	0	0	1	2	0	0.285714	0	0.285714	0	0.714286	0.857143	0.306122	FALSE	TRUE	1	2	TRUE	0.142857	0.52381	-1.87447	-1.01644
518	1	ESYT1_MOUSE	ESYT1_MOUSE		3.9	1092	121555	Extended synaptotagmin-1 OS=Mus musculus GN=Esyt1 PE=2 SV=2	3	3	1	0	1	0	0	0	0	2	0	1	0	0	0	0	2	0	1	0	0	0	0	2	0.285714	0.285714	0	0.428571	0.285714	0	0.857143	0.306122	FALSE	TRUE	1	1	FALSE	0.25	0.380952	-0.607683	-0.23903
606	1	FGFR3_MOUSE	FGFR3_MOUSE		2.6	801	87759	Fibroblast growth factor receptor 3 OS=Mus musculus GN=Fgfr3 PE=1 SV=1	20	1	0.05	0	4	7	1	0	5	3	0	1	0	0	0	0	0	0	1.6	0	0	0	0	0	0.428571	0.657143	0	0.571429	0.428571	0	0	0.297959	FALSE	FALSE	3	2	TRUE	0.414286	0.142857	1.53605	1.15366
63	1	EMD_MOUSE	EMD_MOUSE		6.9	259	29437	Emerin OS=Mus musculus GN=Emd PE=1 SV=1	5	5	1	0	2	1	0	0	1	1	0	2	1	0	0	1	1	0	2	1	0	0	1	1	0	0.714286	0.428571	0	0	0.571429	0.285714	0.285714	FALSE	TRUE	2	2	TRUE	0.285714	0.285714	0	0.187118
406	1	CH60_MOUSE	CH60_MOUSE		9.6	573	60956	60 kDa heat shock protein, mitochondrial OS=Mus musculus GN=Hspd1 PE=1 SV=1	4	4	1	0	2	2	0	0	0	0	0	2	2	0	0	0	0	0	2	2	0	0	0	0	0	0.857143	1.14286	0	0	0	0	0.285714	FALSE	TRUE	2	0	FALSE	0.5	0		0.154692
89	1	AN32A_MOUSE	AN32A_MOUSE		9.7	247	28539	Acidic leucine-rich nuclear phosphoprotein 32 family member A OS=Mus musculus GN=Anp32a PE=1 SV=1	10	3	0.3	0	3	1	0	0	3	3	0	1	0	0	0	0	2	0	1.5	0	0	0	0	2.143	0	0.642857	0	0	0	0	1.30614	0.278429	FALSE	FALSE	2	2	TRUE	0.160714	0.435381	-1.43778	-0.893768
571	1	NR1D2_MOUSE	NR1D2_MOUSE		3.5	576	64303	Nuclear receptor subfamily 1 group D member 2 OS=Mus musculus GN=Nr1d2 PE=2 SV=1	3	1	0.333	0	3	0	0	0	0	0	0	1	0	0	0	0	0	0	1.5	0	0	0	0	0	0.285714	0.642857	0	0.571429	0.428571	0	0	0.27551	FALSE	TRUE	1	0	FALSE	0.375	0.142857	1.39232	0.860129
509	1	K22E_MOUSE	K22E_MOUSE		4.7	707	70924	Keratin, type II cytoskeletal 2 epidermal OS=Mus musculus GN=Krt2 PE=1 SV=1	58	1	0.017	6	5	11	7	12	9	8	0	0	1	0	0	0	0	0	0	1.052	0	0	0	0	0.285714	0	0.864571	0.428571	0.285714	0	0	0.266367	FALSE	FALSE	4	3	TRUE	0.394714	0.0952381	2.0512	1.18322
443	1	TCPB_MOUSE	TCPB_MOUSE		9.2	535	57478	T-complex protein 1 subunit beta OS=Mus musculus GN=Cct2 PE=1 SV=4	3	3	1	0	0	0	0	0	2	1	0	0	0	0	0	2	1	0	0	0	0	0	2	1	0	0	0	0.285714	0	1.14286	0.428571	0.265306	FALSE	TRUE	0	2	TRUE	0.0714286	0.52381	-2.87447	-1.84812
106	1	CSK22_MOUSE	CSK22_MOUSE		15.1	350	41216	Casein kinase II subunit alpha' OS=Mus musculus GN=Csnk2a2 PE=2 SV=1	11	3	0.273	0	3	1	0	0	0	7	0	1	1	0	0	0	1	0	1.167	1	0	0	0	1.231	0	0.595286	0.428571	0	0	0	0.747286	0.25302	FALSE	FALSE	2	1	FALSE	0.255964	0.249095	0.0392451	0.0448914
68	1	MYH11_MOUSE	MYH11_MOUSE		2.3	1972	227029	Myosin-11 OS=Mus musculus GN=Myh11 PE=1 SV=1	11	1	0.091	1	3	2	0	0	3	2	1	0	0	0	0	0	0	1	0	0	0	0	0	0	1.75	0	0	0	0	0	0	0.25	FALSE	FALSE	3	2	TRUE	0.4375	0		0.0203872
662	1	K2C72_MOUSE	K2C72_MOUSE		3.7	520	56751	Keratin, type II cytoskeletal 72 OS=Mus musculus GN=Krt72 PE=2 SV=1	54	0	0	5	5	10	7	10	9	8	0	0	0	0	0	0	0	0	0	0	0	0	0	0	0.428571	0	0	0.714286	0.571429	0	0	0.244898	FALSE	FALSE	4	3	TRUE	0.285714	0.190476	0.584963	0.313599
325	1	CTBP2_MOUSE	CTBP2_MOUSE		11	445	48958	C-terminal-binding protein 2 OS=Mus musculus GN=Ctbp2 PE=1 SV=2	5	3	0.6	0	1	0	0	0	0	4	0	1	0	0	0	0	2	0	1	0	0	0	0	2.8	0	0.285714	0	0	0	0	1.4	0.240816	FALSE	TRUE	1	1	FALSE	0.0714286	0.466667	-2.70782	-1.62895
644	1	CP3AG_MOUSE	CP3AG_MOUSE		14.9	504	57931	Cytochrome P450 3A16 OS=Mus musculus GN=Cyp3a16 PE=2 SV=1	104	0	0	6	26	36	4	4	14	14	0	0	0	0	0	0	0	0	0	0	0	0	0	0	0.428571	0	0	0.642857	0.428571	0	0	0.214286	FALSE	FALSE	4	3	TRUE	0.267857	0.142857	0.906891	0.682742
647	1	H2A2C_MOUSE	H2A2C_MOUSE		60.5	129	13989	Histone H2A type 2-C OS=Mus musculus GN=Hist2h2ac PE=1 SV=3	8097	0	0	1489	815	557	1145	2400	827	864	0	0	0	0	0	0	0	0	0	0	0	0	0	0	0.428571	0	0	0.642857	0.428571	0	0	0.214286	FALSE	FALSE	4	3	TRUE	0.267857	0.142857	0.906891	0.668206
111	1	COPB2_MOUSE	COPB2_MOUSE		6.1	905	102450	Coatomer subunit beta' OS=Mus musculus GN=Copb2 PE=2 SV=2	4	4	1	0	2	1	0	0	0	1	0	2	1	0	0	0	1	0	2	1	0	0	0	1	0	0.714286	0.428571	0	0	0	0.285714	0.204082	FALSE	TRUE	2	1	FALSE	0.285714	0.0952381	1.58496	1.03526
67	1	MLX_MOUSE	MLX_MOUSE		9.4	298	33340	Max-like protein X OS=Mus musculus GN=Mlx PE=1 SV=1	3	3	1	0	0	1	0	0	0	2	0	0	1	0	0	0	2	0	0	1	0	0	0	2	0	0	0.428571	0	0	0	0.857143	0.183673	FALSE	TRUE	1	1	FALSE	0.107143	0.285714	-1.41504	-0.826197
147	1	CO3_MOUSE	CO3_MOUSE		2.4	1663	186484	Complement C3 OS=Mus musculus GN=C3 PE=1 SV=2	3	3	1	0	0	2	0	0	0	1	0	0	2	0	0	0	1	0	0	2	0	0	0	1	0	0	1	0	0	0	0.285714	0.183673	FALSE	TRUE	1	1	FALSE	0.25	0.0952381	1.39232	0.889876
349	1	RAB5B_MOUSE	RAB5B_MOUSE		16.7	215	23708	Ras-related protein Rab-5B OS=Mus musculus GN=Rab5b PE=1 SV=1	14	1	0.071	0	5	0	0	1	3	5	0	1	0	0	0	0	0	0	2.333	0	0	0	0	0	0	1.19043	0	0	0	0	0	0.170061	FALSE	FALSE	1	3	TRUE	0.297607	0		0.175895
427	1	1433F_MOUSE	1433F_MOUSE		17.1	246	28213	14-3-3 protein eta OS=Mus musculus GN=Ywhah PE=1 SV=2	29	1	0.034	6	4	4	5	2	5	3	0	0	1	0	0	0	0	0	0	1.143	0	0	0	0	0	0	0.877571	0.285714	0	0	0	0.166184	FALSE	FALSE	4	3	TRUE	0.290821	0		0.0490626
328	1	CP239_MOUSE	CP239_MOUSE		9.6	490	55904	Cytochrome P450 2C39 OS=Mus musculus GN=Cyp2c39 PE=2 SV=1	70	1	0.014	7	21	25	4	2	6	5	0	1	0	0	0	0	0	0	2.042	0	0	0	0	0	0	1.14886	0	0	0	0	0	0.164122	FALSE	FALSE	4	3	TRUE	0.287214	0		0.0532876
317	1	ELN_MOUSE	ELN_MOUSE		2.9	860	71955	Elastin OS=Mus musculus GN=Eln PE=2 SV=1	2	2	1	0	0	0	0	0	2	0	0	0	0	0	0	2	0	0	0	0	0	0	2	0	0	0	0	0	0	1.14286	0	0.163265	FALSE	TRUE	0	1	FALSE	0	0.380952		0.0532876
416	1	RALA_MOUSE	RALA_MOUSE		8.3	206	23554	Ras-related protein Ral-A OS=Mus musculus GN=Rala PE=1 SV=1	3	3	1	0	1	0	0	0	0	2	0	1	0	0	0	0	2	0	1	0	0	0	0	2	0	0.285714	0	0	0	0	0.857143	0.163265	FALSE	TRUE	1	1	FALSE	0.0714286	0.285714	-2	-1.11238
437	1	TERF1_MOUSE	TERF1_MOUSE		5.5	421	48225	Telomeric repeat-binding factor 1 OS=Mus musculus GN=Terf1 PE=2 SV=1	2	2	1	0	0	0	0	0	0	2	0	0	0	0	0	0	2	0	0	0	0	0	0	2	0	0	0	0.285714	0	0	0.857143	0.163265	FALSE	TRUE	0	1	FALSE	0.0714286	0.285714	-2	-1.43812
320	1	RAB8A_MOUSE	RAB8A_MOUSE		16.4	207	23669	Ras-related protein Rab-8A OS=Mus musculus GN=Rab8a PE=1 SV=2	37	1	0.027	4	8	6	2	2	10	5	0	0	0	0	0	1	0	0	0	0	0	0	1.9	0	0	0	0	0	0	1.12857	0	0.161224	FALSE	FALSE	4	3	TRUE	0	0.37619		-0.022753
52	1	ARI4B_MOUSE	ARI4B_MOUSE		3.6	1314	147644	AT-rich interactive domain-containing protein 4B OS=Mus musculus GN=Arid4b PE=2 SV=1	3	3	1	0	2	0	0	0	0	1	0	2	0	0	0	0	1	0	2	0	0	0	0	1	0	0.714286	0	0	0	0	0.285714	0.142857	FALSE	TRUE	1	1	FALSE	0.178571	0.0952381	0.906891	0.609137
532	1	K22O_MOUSE	K22O_MOUSE		6.2	594	62846	Keratin, type II cytoskeletal 2 oral OS=Mus musculus GN=Krt76 PE=2 SV=1	79	0	0	7	10	14	12	14	12	10	0	0	0	0	0	0	0	0	0	0	0	0	0	0	0.285714	0	0	0.428571	0.285714	0	0	0.142857	FALSE	FALSE	4	3	TRUE	0.178571	0.0952381	0.906891	0.79776
260	1	FOXA3_MOUSE	FOXA3_MOUSE		10.2	353	37602	Hepatocyte nuclear factor 3-gamma OS=Mus musculus GN=Foxa3 PE=1 SV=1	5	1	0.2	0	0	2	0	0	0	3	0	0	1	0	0	0	0	0	0	1.167	0	0	0	0	0	0	0.881	0	0	0	0	0.125857	FALSE	FALSE	1	1	FALSE	0.22025	0		0.0938175
121	1	NMT1_MOUSE	NMT1_MOUSE		7.1	496	56889	Glycylpeptide N-tetradecanoyltransferase 1 OS=Mus musculus GN=Nmt1 PE=1 SV=1	2	2	1	0	0	0	0	0	0	2	0	0	0	0	0	0	2	0	0	0	0	0	0	2	0	0	0	0	0	0	0.857143	0.122449	FALSE	TRUE	0	1	FALSE	0	0.285714		0.325661
129	1	ZF106_MOUSE	ZF106_MOUSE		2.2	1888	208975	Zinc finger protein 106 OS=Mus musculus GN=Zfp106 PE=1 SV=2	2	2	1	0	0	0	0	0	0	2	0	0	0	0	0	0	2	0	0	0	0	0	0	2	0	0	0	0	0	0	0.857143	0.122449	FALSE	TRUE	0	1	FALSE	0	0.285714		0.325661
192	1	IFI4_MOUSE	IFI4_MOUSE		3.4	640	71651	Interferon-activable protein 204 OS=Mus musculus GN=Ifi204 PE=1 SV=2	2	1	0.5	0	0	0	0	0	0	2	0	0	0	0	0	0	1	0	0	0	0	0	0	1.067	0	0	0	0	0	0	0.723857	0.103408	FALSE	TRUE	0	1	FALSE	0	0.241286		0.325661
40	1	ITB4_MOUSE	ITB4_MOUSE		1.4	1818	201651	Integrin beta-4 OS=Mus musculus GN=Itgb4 PE=1 SV=1	2	2	1	0	2	0	0	0	0	0	0	2	0	0	0	0	0	0	2	0	0	0	0	0	0	0.714286	0	0	0	0	0	0.102041	FALSE	TRUE	1	0	FALSE	0.178571	0		0.325661
188	1	HA17_MOUSE	HA17_MOUSE		9.3	334	37925	H-2 class I histocompatibility antigen, Q7 alpha chain OS=Mus musculus GN=H2-Q7 PE=1 SV=1	4	1	0.25	0	2	1	0	0	0	1	0	0	0	0	0	0	1	0	0	0	0	0	0	1	0	0	0	0	0	0	0.285714	0.0408163	FALSE	FALSE	2	1	FALSE	0	0.0952381		0.325661
467	1	TBB5_MOUSE	TBB5_MOUSE		17.6	444	49672	Tubulin beta-5 chain OS=Mus musculus GN=Tubb5 PE=1 SV=1	18	0	0	2	5	1	0	0	4	6	0	0	0	0	0	0	0	0	0	0	0	0	0	0	0	0	0	0.285714	0	0	0	0.0408163	FALSE	FALSE	3	2	TRUE	0.0714286	0		0.325661
424	1	TBA1A_MOUSE	TBA1A_MOUSE		20.6	451	50137	Tubulin alpha-1A chain OS=Mus musculus GN=Tuba1a PE=1 SV=1	38	0	0	0	11	2	3	0	12	10	0	0	0	0	0	0	0	0	0	0	0	0	0	0	0	0	0	0.142857	0	0	0	0.0204082	FALSE	FALSE	3	2	TRUE	0.0357143	0		0.325661
425	1	TBB2C_MOUSE	TBB2C_MOUSE		17.5	445	49832	Tubulin beta-2C chain OS=Mus musculus GN=Tubb2c PE=1 SV=1	19	0	0	2	4	0	0	0	5	8	0	0	0	0	0	0	0	0	0	0	0	0	0	0	0	0	0	0.142857	0	0	0	0.0204082	FALSE	FALSE	2	2	TRUE	0.0357143	0		0.325661
153	1	TBA1B_MOUSE	TBA1B_MOUSE		20.6	451	50153	Tubulin alpha-1B chain OS=Mus musculus GN=Tuba1b PE=1 SV=2	45	0	0	0	11	6	3	0	12	13	0	0	0	0	0	0	0	0	0	0	0	0	0	0	0	0	0	0	0	0	0	0	FALSE	FALSE	3	2	TRUE	0	0		0.325661
178	1	MUP2_MOUSE	MUP2_MOUSE		46.1	180	20665	Major urinary protein 2 OS=Mus musculus GN=Mup2 PE=1 SV=1	95	0	0	1	6	36	0	19	17	16	0	0	0	0	0	0	0	0	0	0	0	0	0	0	0	0	0	0	0	0	0	0	FALSE	FALSE	3	3	TRUE	0	0		0.325661
197	1	HS71L_MOUSE	HS71L_MOUSE		19.7	641	70638	Heat shock 70 kDa protein 1-like OS=Mus musculus GN=Hspa1l PE=2 SV=4	620	0	0	105	58	63	127	126	63	78	0	0	0	0	0	0	0	0	0	0	0	0	0	0	0	0	0	0	0	0	0	0	FALSE	FALSE	4	3	TRUE	0	0		0.325661
274	1	H13_MOUSE	H13_MOUSE		38	221	22101	Histone H1.3 OS=Mus musculus GN=Hist1h1d PE=1 SV=2	2964	0	0	666	332	213	637	611	285	220	0	0	0	0	0	0	0	0	0	0	0	0	0	0	0	0	0	0	0	0	0	0	FALSE	FALSE	4	3	TRUE	0	0		0.325661
[truncated: 5 more columns]
